# Supplementary material for: Bumble Bee Foraged Pollen Analyses in Spring Time in Southern Estonia Shows Abundant Food Sources
Source: MDPI journal article supplement (doi:10.3390/insects12100922), 2021-10-09
Supplement: s1 [file s1]

**Table S1.** The strength of correlations based on r-values between land use parameters and proportions of plant families, proportions of strawberry pollen and numbers of plant families in bumble bee corbicular pollen. The estimations are based on microscopy pollen grain counts and proportions of reads from DNA metabarcoding over pooled samples per hive, location and date. Red colours indicate negative and green colours positive correlations, the intensity of the colour increases towards values closer to -1 or 1. Pale colours indicate values close to zero. The statistically significant correlations are indicated with black frames.

|               |                            | Microscopy |             |           |      |               | DNA barcoding |             |           |      |               |
|---------------|----------------------------|------------|-------------|-----------|------|---------------|---------------|-------------|-----------|------|---------------|
|               |                            | Woodland   | Arable land | Grassland | Yard | Fruit gardens | Woodland      | Arable land | Grassland | Yard | Fruit gardens |
| 400 m radius  | Apiaceae                   |            |             |           |      |               |               |             |           |      |               |
|               | Asteraceae                 |            |             |           |      |               |               |             |           |      |               |
|               | Brassicaceae               |            |             |           |      |               |               |             |           |      |               |
|               | Caryophyllaceae            |            |             |           |      |               |               |             |           |      |               |
|               | Ericaceae                  |            |             |           |      |               |               |             |           |      |               |
|               | Fabaceae                   |            |             |           |      |               |               |             |           |      |               |
|               | Lamiaceae                  |            |             |           |      |               |               |             |           |      |               |
|               | Papaveraceae               |            |             |           |      |               |               |             |           |      |               |
|               | Plantaginaceae             |            |             |           |      |               |               |             |           |      |               |
|               | Ranunculaceae              |            |             |           |      |               |               |             |           |      |               |
|               | Rosaceae                   |            |             |           |      |               |               |             |           |      |               |
|               | Violaceae                  |            |             |           |      |               |               |             |           |      |               |
|               | Boraginaceae               |            |             |           |      |               |               |             |           |      |               |
|               | Orobanchaceae              |            |             |           |      |               |               |             |           |      |               |
|               | Primulaceae                |            |             |           |      |               |               |             |           |      |               |
|               | Salicaceae                 |            |             |           |      |               |               |             |           |      |               |
|               | <i>Fragaria x ananassa</i> |            |             |           |      |               |               |             |           |      |               |
|               | No. of Families            |            |             |           |      |               |               |             |           |      |               |
| 1000 m radius | Apiaceae                   |            |             |           |      |               |               |             |           |      |               |
|               | Asteraceae                 |            |             |           |      |               |               |             |           |      |               |
|               | Brassicaceae               |            |             |           |      |               |               |             |           |      |               |
|               | Caryophyllaceae            |            |             |           |      |               |               |             |           |      |               |
|               | Ericaceae                  |            |             |           |      |               |               |             |           |      |               |
|               | Fabaceae                   |            |             |           |      |               |               |             |           |      |               |
|               | Lamiaceae                  |            |             |           |      |               |               |             |           |      |               |
|               | Papaveraceae               |            |             |           |      |               |               |             |           |      |               |
|               | Plantaginaceae             |            |             |           |      |               |               |             |           |      |               |
|               | Ranunculaceae              |            |             |           |      |               |               |             |           |      |               |
|               | Rosaceae                   |            |             |           |      |               |               |             |           |      |               |
|               | Violaceae                  |            |             |           |      |               |               |             |           |      |               |
|               | Boraginaceae               |            |             |           |      |               |               |             |           |      |               |
|               | Orobanchaceae              |            |             |           |      |               |               |             |           |      |               |
|               | Primulaceae                |            |             |           |      |               |               |             |           |      |               |
|               | Salicaceae                 |            |             |           |      |               |               |             |           |      |               |
|               | <i>Fragaria x ananassa</i> |            |             |           |      |               |               |             |           |      |               |
|               | No. of Families            |            |             |           |      |               |               |             |           |      |               |
|               |                            |            |             |           |      |               |               |             |           |      |               |
|               | r-value                    | 1          | 0.5         | 0         | -0.5 | -1            |               |             |           |      |               |
