# Supplementary material for: Bumble Bee Foraged Pollen Analyses in Spring Time in Southern Estonia Shows Abundant Food Sources
Source: MDPI journal article supplement (doi:10.3390/insects12100922), 2021-10-09

**Figure S3.** The correlation matrixes of proportions of pollen grains counted with microscopy and relative abundance of reads of the results of DNA barcoding

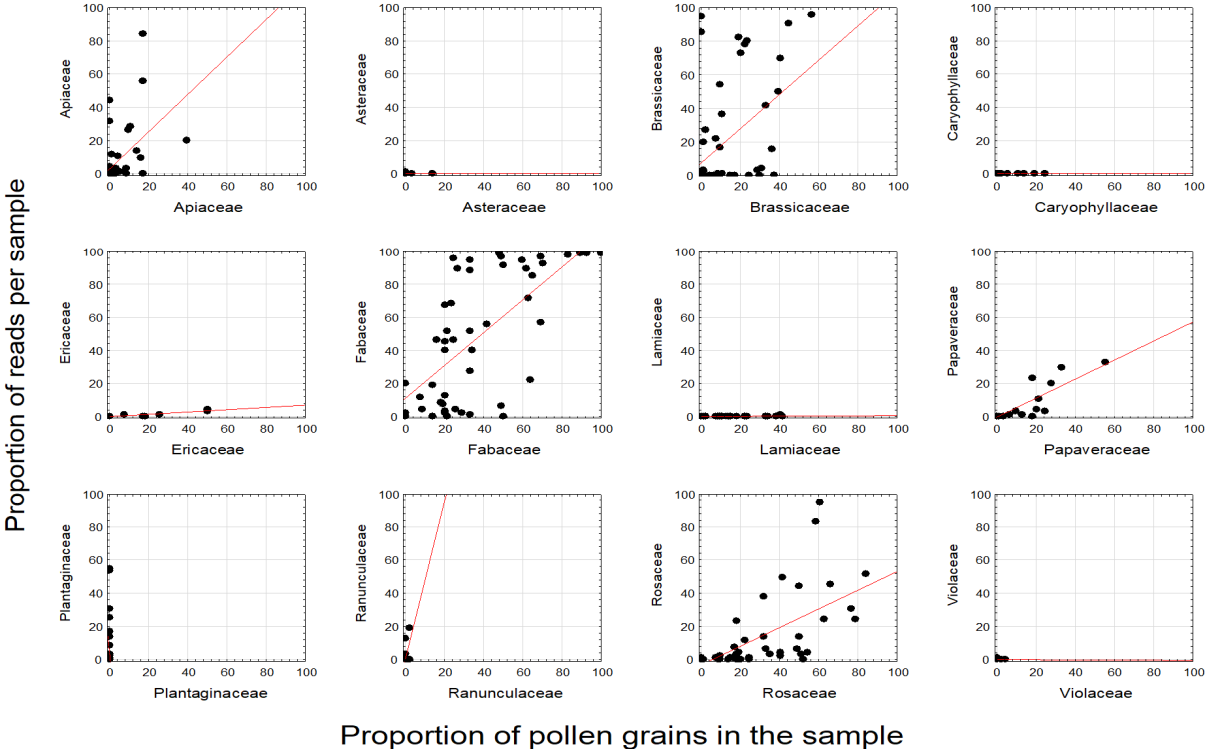

Supplement: s1 [file s1]
