# Supplementary material for: Bumble Bee Foraged Pollen Analyses in Spring Time in Southern Estonia Shows Abundant Food Sources
Source: MDPI journal article supplement (doi:10.3390/insects12100922), 2021-10-09

Field

X-GIS. Maa-amet. Koik õigused kaitstud.

X-GIS. Maa-amet. Kõik õigused kaitstud.

[illegible]

**X-GIS. Maa-amet. Kõik õigused kaitstud.**



## Orchard

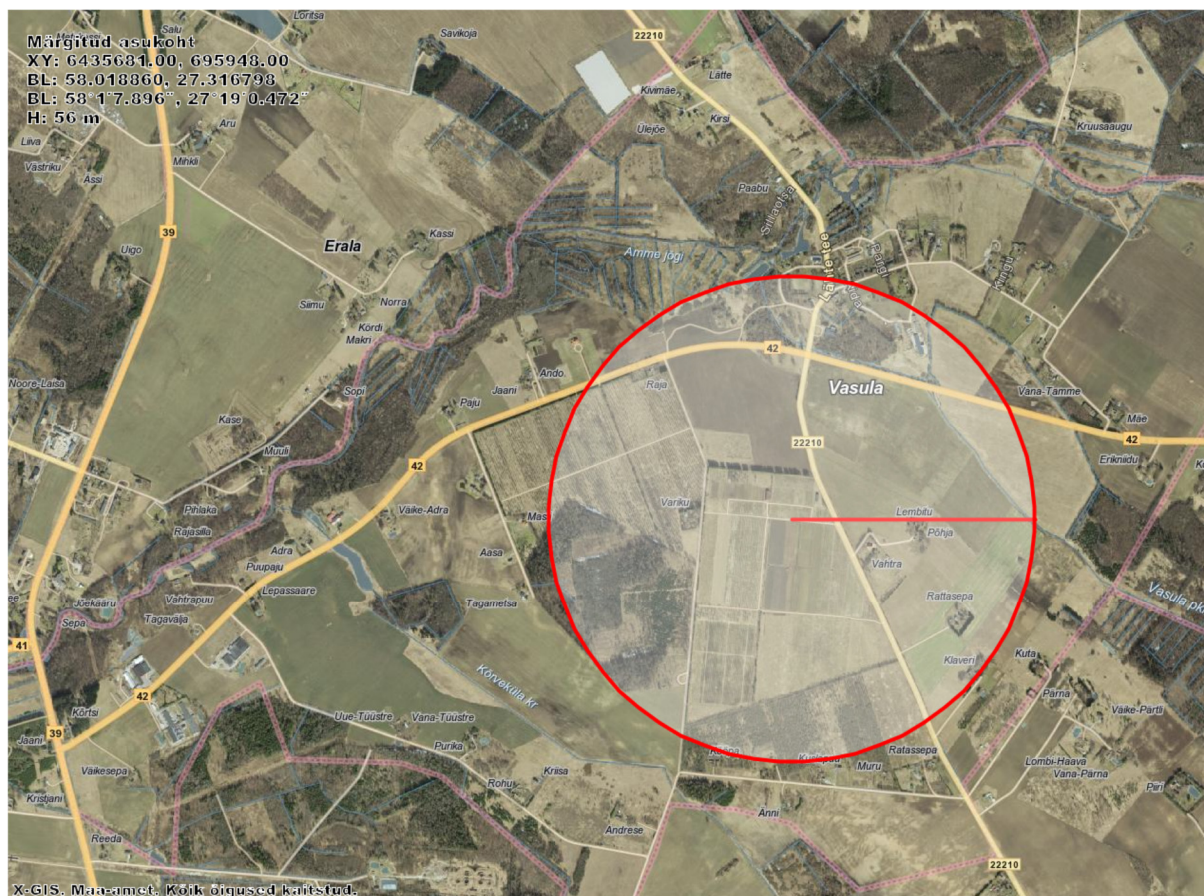

Supplement: s1 [file s1]
