# Supplementary material for: Bumble Bee Foraged Pollen Analyses in Spring Time in Southern Estonia Shows Abundant Food Sources
Source: MDPI journal article supplement (doi:10.3390/insects12100922), 2021-10-09
Supplement: s1 [file s1]

**Table S2.** Results of statistical analyses (Kruskal-Wallis H test and relevant DF values) of variation of proportions of plant families on both microscopy and DNA barcoding data at site and landscape level. P-values in bold indicate statistically significant differences.

| Plant family    | Microscopy       |                  |                    |              | DNA metabarcoding |                  |                    |              |
|-----------------|------------------|------------------|--------------------|--------------|-------------------|------------------|--------------------|--------------|
|                 | Site             |                  | Landscape category |              | Site              |                  | Landscape category |              |
|                 | <i>H</i> (14;54) | <i>P</i>         | <i>H</i> (2;54)    | <i>P</i>     | <i>H</i> (14;54)  | <i>P</i>         | <i>H</i> (2;54)    | <i>P</i>     |
| Apiaceae        | 27.63            | <b>0.016</b>     | 7.08               | <b>0.03</b>  | 29.21             | <b>0.009</b>     | 5.53               | 0.06         |
| Asteraceae      | 14.10            | 0.44             | 0.58               | 0.75         | 12.22             | 0.59             | 3.73               | 0.15         |
| Brassicaceae    | 28.69            | <b>0.012</b>     | 10.86              | <b>0.004</b> | 31.76             | <b>0.004</b>     | 6.54               | <b>0.04</b>  |
| Caryophyllaceae | 13.16            | 0.51             | 0.57               | 0.75         | 12.20             | 0.59             | 2.05               | 0.36         |
| Ericaceae       | 40.10            | <b>&lt;0.001</b> | 3.69               | 0.16         | 34.05             | <b>0.002</b>     | 0.86               | 0.65         |
| Fabaceae        | 32.67            | <b>0.003</b>     | 3.96               | 0.14         | 36.70             | <b>0.001</b>     | 7.07               | <b>0.029</b> |
| Lamiaceae       | 22.17            | 0.075            | 5.13               | 0.08         | 28.04             | <b>0.014</b>     | 2.61               | 0.27         |
| Papaveraceae    | 32.68            | <b>0.003</b>     | 5.27               | 0.07         | 31.62             | <b>0.005</b>     | 10.93              | <b>0.004</b> |
| Plantaginaceae  | 16.31            | 0.29             | 2.29               | 0.32         | 31.61             | <b>0.005</b>     | 0.22               | 0.90         |
| Ranunculaceae   | 6.98             | 0.93             | 0.20               | 0.91         | 14.87             | 0.38             | 4.23               | 0.12         |
| Rosaceae        | 28.36            | <b>0.013</b>     | 0.28               | 0.87         | 33.62             | <b>0.002</b>     | 0.82               | 0.66         |
| Violaceae       | 12.36            | 0.58             | 1.49               | 0.47         | 16.30             | 0.29             | 0.47               | 0.79         |
| Boraginaceae    |                  |                  |                    |              | 31.57             | <b>0.005</b>     | 0.06               | 0.97         |
| Orobanchaceae   |                  |                  |                    |              | 38.43             | <b>&lt;0.001</b> | 2.30               | 0.32         |
| Primulaceae     |                  |                  |                    |              | 38.81             | <b>&lt;0.001</b> | 1.55               | 0.46         |
| Salicaceae      |                  |                  |                    |              | 19.98             | 0.13             | <b>7.76</b>        | <b>0.02</b>  |
