# Supplementary material for: Bumble Bee Foraged Pollen Analyses in Spring Time in Southern Estonia Shows Abundant Food Sources
Source: Insects. 2021 Oct 9;12(10):922. doi: 10.3390/insects12100922 (PMC8538635; doi:10.3390/insects12100922)
Supplement: Supplementary file 1 [file insects-12-00922-s001.zip]

Archive with 6 entries (6 files):
- Bontšutšnaja 2021 dataset.xlsx
- Insects-1346492_Suppl_Figure_S1.pdf
- Insects-1346492_Suppl_Figure_S2.pdf
- Insects-1346492_Suppl_Figure_S3.pdf
- Insects-1346492_Suppl_Table_S2.pdf
- insects_1346492_Suppl_Table_S1.pdf
