# Supplementary material for: Bumble Bee Foraged Pollen Analyses in Spring Time in Southern Estonia Shows Abundant Food Sources
Source: Insects. 2021 Oct 9;12(10):922. doi: 10.3390/insects12100922 (PMC8538635; doi:10.3390/insects12100922)
Supplement: Supplementary file 1 [file insects-12-00922-s001.zip › Bontšutšnaja 2021 dataset.xlsx]

## Sheet: Sequences
106	>M01634_72_000000000-C3HGL_1_1101_10432_8661	M01634_72_000000000-C3HGL_1_1101_10432_8661	TGCAGAATCCCGTGAACCATCGAGTCTTTGAACGCA-AGTTGCG-------------CCCCAAGCC-TTCTGGCCGAGGGCATGTCTGCCTGGGTGTC---ACAAAT----CGTCG--------T-----------CC---------------------CC---C------CATC--CTCT-----C-----------------------GAG---GAT----------------A-TGGGACG----GAATCTGATC-TCCCATGTG----T---TAGCG-CACGCTGTTGGCCAAAAT----CAAAGCTA-AGGACG-CCAAGAGCG--TCTT-GACATGCGG----TGGTG------------------AA----------------TTCA-----…
2	>M01634_72_000000000-C3HGL_1_1101_10611_3917	M01634_72_000000000-C3HGL_1_1101_10611_3917	TGCAGAATCCCGTGAACCATCGAGTTTTTGAACGCA-AGTTGCG-------------CCCGAGACC-TTTAGGTTGAGGGCACGTCTGCCTGGGCGTC---ACACAC--AGCGTCG--------------------CT---------------------CT---A------CACCAACCTA-----------------------------GTT---GGT----------------A-GGGAGCG----GATATTGGCC-CCCCGAGTC--------CTTTG-GGCACGGTCGGCACAAAT----ATTGGTCC-CCGGCA---GCGAGTG--TCGC-GGTCAGCGG----TGGTTGTATTTTCCTCCAAAGACAA-------AATGACGCGTTC------…
528	>M01634_72_000000000-C3HGL_1_1101_11053_10072	M01634_72_000000000-C3HGL_1_1101_11053_10072	TGTAGAATCCCGTGAACCATCGAGTCTTTGAACGCA-AGTTGCG-------------CCCGAAGCC-TTCTGGTTGAGGGCACGTCTGCCTGGGCGTC---ACGCAT--CGCATCG-----CA-------------TC---------------------CC---A---ACTCGTCCCCTTC-----------------------------GGGAGTGAT-------------AGAGTGGGATCA----GATATTGGTC-CCCCGTGCG--------CACCAGCGCGCGGTTAGCCTAAAT----GCAAACTC-GCGGCG---ACTCGCG--TTGC-GACAAGTGG----TGGTT------------------GA------------ACGCTCAA-----…
460	>M01634_72_000000000-C3HGL_1_1101_11154_6140	M01634_72_000000000-C3HGL_1_1101_11154_6140	TGTAGAATCTCGTGAATCACCGAGTCTTTGAATGCA-AGTTGCG-------------CCCAAAGCC-TTTAGGCTAAGGGCACGTCTGCCTAGGTGTC---ACGTAT--ACCATCG-----TA-------------CC---------------------CC---A---ACCCATCCCAACT-----C-----------------------AGGCATGAT-----------TGTTAGGGGGAGTG----GATATTGGCC-TCCCGTGTA--------CTCGC-ATTATGGTTGGTCTAAAA----TCGAGCCC-CAAGCG---ATGACCG--TCAT-GACAAGTGG----TGGTC------------TATAATAG------------CTATTTCG-----…
9	>M01634_72_000000000-C3HGL_1_1101_11767_10929	M01634_72_000000000-C3HGL_1_1101_11767_10929	TGCAGAATCCCGTGAACCATTGAGTCTTTGAACGCA-AGTTGCG-------------CCCGAAGCC-ACTAGGCTAAGGGCACGTCTGCCTGGGTGTC---ACGCAT-CT-AGTTG--------------------CC---------------------CC---C---TGACCAAACTAAT-----CTTCT-------------------AAG---AGATTTTGTCG---GT--TT-GGGGGCG----GAAATTAGCC-TCCTGTGC---------CATGT-TGTGCGGCTGGCGTAAAA----CTGAGTCT-ATGGTG---ACGAATG--TCAC-GACAT-CGG----TGGTTGTA-------------AGAA------------GACCTTCT-----…
591	>M01634_72_000000000-C3HGL_1_1101_11915_15590	M01634_72_000000000-C3HGL_1_1101_11915_15590	TGCAGAATCCCGTGAACCATCGAGTCTTTGAACGCA-AGTTGCG-------------CCCCAAGCC-TTCTGGCCGAGGGCACGTCTGCCTGGGTGTC---ACAAAT----CGTCG------------------TTCC---------------------CC---C------TCAT--CCTT-----C-----------------------AAG---GAT----------------T-CGGGACG----GAAGCTGATC-TCCCGTGTG----T---TACCG-CACGCGGTTGATCGAAAT----CCGAGCTA-AGGACG-TCAGGAGCG--TCTT-GACATGCGG----TGGTG------------------AA----------------TTTA-----…
174	>M01634_72_000000000-C3HGL_1_1101_11917_6807	M01634_72_000000000-C3HGL_1_1101_11917_6807	CGATACTTGGTGTGAATTGC---AGAATCC---CGTGA-------------------ACC---------------------AT---C------GAGT--CTTT-----G-----------------------AACG--CAA----------------G-TTGCGCC----CCAAGCCTTC-TCCCGTGTG----T---TACCG-CACGCGGTTGGCCAAAAT----CCGAGCTA-AGGACG-TCAGAAGCG--TCTT-GACATGCGG----TGGTG------------------AA----------------TTTA--------------------ATT-----------------CTCG-------TCATAT---AG--TCA---GACGT---TC---…
811	>M01634_72_000000000-C3HGL_1_1101_12050_18851	M01634_72_000000000-C3HGL_1_1101_12050_18851	TGCTGAATCCCGTGAACCATCGAGTCTTTGAACCCA-AGTTGCG-------------CCAGAAGCC-ATTAGGCCGAGGGCACGTCTGCCTGGGCGTC---ACACGT----CGTTG--------CC----------CC---------------------CC----------CAAC-CCCCT-----C-----------------------GGG---AGT-----TG--------GA-TGGGATG----GATGATGGCA-TCCCGTGTG----C---TCAGT-CACGTGGTTGGTATAAAT---ACCAAGTCC-TCAGCG---ACCAACA--CCAC-GACAATCGG----TGGTTG---------------TCAA------------A-CCTCGG-----…
778	>M01634_72_000000000-C3HGL_1_1101_12097_24078	M01634_72_000000000-C3HGL_1_1101_12097_24078	T---------------------TA---C---------ACATCGT-----ACGCCTGGTGCTGG------TATGCGA---TAC----------------T-TGGTGTG----AATGTTGGCC-TCCCGTGAG----C---TTTGT-CTCACGGTTGGTTGAAAA----TCGAGTGC-ATGGTG---TCGGGTGTACCAT-GATGGATGG--TGGTTGAGTGATGATGCTCGAGACCAA-----------------TCA------------TGGGT---AAC-----------------TCCA-------CCAGAA---TT----------G-G---GC----TCGGTGACC------CACA-TGC------------GTCCCT-TGG---A----TGCT-…
393	>M01634_72_000000000-C3HGL_1_1101_12356_24967	M01634_72_000000000-C3HGL_1_1101_12356_24967	TGCAGAATTTCGTGAATCATCGAGTCTTTGAACGCA-AGTTGCT-------------CCAGAAGCC-ATTAGGCCGAGGGCACGTCTGCCTGGGCATC---ACACAT--CGCGTCG--------------------CC---------------------CC---C---ACTCCCC--CCAA-----------------------------GGGGCGAGC------------------GGGGGTG----GAGATTGGCC-CCCCGTGCG--CGCATCCCGCG-CGCGCGGCCGACCCAAAT----TCGAATCCGCCATCG---ACGCACG--TCGC-GACCAGTGG----TGATT------------------GA------------ATCTTCAA-----…
555	>M01634_72_000000000-C3HGL_1_1101_12515_17176	M01634_72_000000000-C3HGL_1_1101_12515_17176	TGCAGAATCCCGTGAACCATCGAGTCTTTGAACGCA-AGTTGCG-------------CCCGAAGCC-ATTAGGTCGAGGGCACGCCTGCCT--G-G-----G----T-----GTTG--------------------CC---------------------CC---C---GTGCCTTGGCCAC-----GTTCC-------------------AGG---CAC-----------CA--AG-TGGGGCG----AATATTGGCT-TCTCGCGAG----C---AATGT-CTCACGGTTGGTTGAAAA----CTGAGTCC-GCGGTG---GAGGGCG--CCGT-GATGGATGG----TGGCTGAGTTAAAGCTCGAGACCGA-----------------TCG-----…
444	>M01634_72_000000000-C3HGL_1_1101_12909_13070	M01634_72_000000000-C3HGL_1_1101_12909_13070	TGCAGAATCCCGTGAACCATCGAGTCTTTGAACGCA-AGTTGCG-------------CCCGAAGCC-ATCAGGCCGAGGGCACGCCTGCCTGGGCGTC---ACACGC----CGTTGC-------C----------CTC---------------------CC---C-----CGCGCATCCCT-----C-----------------------GGG---AGC-----------GTCGGG-AGGGGCG----GACGATGGCC-TCCCGTGCG----T---CACCC-CGCGCGGTTGGCACAAAT---GCCGGGTCC-TCGGCG---ACGAACG--CCAC-GACAATCGG-TGGTCGTCGAA------TCGAACCTCGG-----------------TTG-----…
1	>M01634_72_000000000-C3HGL_1_1101_12995_2137	M01634_72_000000000-C3HGL_1_1101_12995_2137	TGCAGAATCCCGTGAACCATCGAGTCTTTGAACGCA-AGTTGCG-------------CCCGAAGCC-ATTAGGCCGAGGGCACGTCTGCCTGGGCGTC---ACACGT----CGTTG--------CC----------CC---------------------CC---C------CGAC-CCCTT-----C-----------------------CGG---AGT-----CG--------GG-CGGGACG----GATGGTGATC-TCCCGTGCG--------CCAGT-CGCGCGGTTGGTCTAAAT---ATCGAGTCC-CCGGCG---ACCGGCG--CCGC-GACAATCGG----TGGTTG---------------TGAG------------A-CCTCGG-----…
632	>M01634_72_000000000-C3HGL_1_1101_13300_14698	M01634_72_000000000-C3HGL_1_1101_13300_14698	TGCAGAATCCCGTGAACCATCGAGTCTTTGAACGCA-AGTTGCG-------------CCCCAAGCC-TTCTGGCCGAGGGCACGTCTGCATGGGTGTC---ACAAAT----CGTCG-------T------------CC---------------------CC---C------CATC--CTCT-----C-----------------------GAG---GAT----------------A-TGGGACG----GAAGCTGATC-TCCCGTGTG----T---TACCG-CACGCGGTTGGCCAAAAT----CCGAGCTA-AAGACG-TCAGGAGCG--TCTT-GACATGCGG----TGGTA------------------AA----------------TTTA-----…
356	>M01634_72_000000000-C3HGL_1_1101_13572_25635	M01634_72_000000000-C3HGL_1_1101_13572_25635	TGCAGAATCCCGTGAACCATCGAGTTTTTGAACGCA-AGTTGCG-------------CCCTAGGCC-ATCCGGCTGAGGGCACGCCTGCCTGGGCGTC---ACGCAC-TG-AGTCG--------------------CC---------------------CC---T--------TCTTCTCC-----------------------------GAG---GAG------------A--GA-TGGAGCG----GAGATTGGCC-CCCCGTGC---------TTCCG-AGTGCGGTCGGCCTAAAA----CTTGGCCC-TTGGAG---GCCGGCG--TCAC-GATCCGTGG----TGGTTGGC---------------------------------ATCA-----…
448	>M01634_72_000000000-C3HGL_1_1101_13591_11676	M01634_72_000000000-C3HGL_1_1101_13591_11676	TGCAGAATCCTGTGAACTATCGAGTCTTTGAACGCA-AGTTTTG-------------CCCAAGGCC-TCCTGGTCGAGGGCACGTCTGCTTGGGTGTC---ACGCAT----CGTCG--------------------CC---------------------CC---C------GCTCCCCTCAGCTCAC-----------------------GAG---GGC------------------GGGGGCG----GATACTGGTC-TCCCGCGGG----C---TCCCG-CCCGTGGTTGGCCTAAAA----TTGAGTCC-CCGGTG---ATGGTCG--CCAT-GACAAACGG----TGGTTGA----------------GA------------GACCCTCG-----…
689	>M01634_72_000000000-C3HGL_1_1101_13991_7752	M01634_72_000000000-C3HGL_1_1101_13991_7752	TGCAGAATCTCGTGAACCATCGAGTCTTTGAACGCA-AGTTGCG-------------CCCGAAGCC-ATTAGGCCGAAGGCACGTCTGCCTGGGCGTC---TCGCAA--CGCGTCG--------------------CC---------------------CC---C-----AACCCCCCCCCT-------------------GTCCTCCGGACATCCGGGTGCGTT------------GTGGGCG----GATGATGGTC-TCCCGTGCG--------CGAAAGCCCGCGGCTGGCCTAAAA----GTGAAGTCCCCGACG--ATGGATCG--TCAC-GACACGTGG----TGGTTGAAC--------------AA-------------------------…
518	>M01634_72_000000000-C3HGL_1_1101_14222_10150	M01634_72_000000000-C3HGL_1_1101_14222_10150	TGTAGAATCCCGTGAATCACCGAGTCTTTGAACGCA-TGTTGTG-------------CCCAATACC-TTTAGGCTGAGGGCACGTATGGCTGGGCGTC---ACATAT--CCCGTCG-----CAC------------CC---------------------CC---A---ACCCATCCCAACT-----C-----------------------GGGCATGAT-----------GGATGGTGGGAGCG----GATATTGGCC-TCCCATGTA--------CTCGC-GTTACGGTTGGTCTAAAA----TTAAGCCC-CAAGTG---ACGAATG--TCAC-GACAAGTGG----TGGTC------------TATAATAG------------CTATTTTG-----…
684	>M01634_72_000000000-C3HGL_1_1101_14478_11732	M01634_72_000000000-C3HGL_1_1101_14478_11732	TGC-AGAATCCCGTGAACCATCGAGTCTTTG-AAC---GCAAGT--TGCGCCC--------------------GA---------------------AG---C---CATTAGG--CCGA-----------------------------GGGCACGTC------------------TGCCTGG----GCGTCACGCA-TCGCGTCGCC-CCCACTCCCCC-CTAGGGGCGAGCGGGGGC----GGAGATTGGCC--CC---CCGCACG--TCGC-GACCAGTGG----TGGTT------------------GA------------ATCCTCAA--------------------CTCGCGT-------------GCTG-------TCGCGT---AC--CAAT…
803	>M01634_72_000000000-C3HGL_1_1101_15024_10643	M01634_72_000000000-C3HGL_1_1101_15024_10643	TGCAGAATCCCGTGAACCATCGAGTCTTTGAACGCA-AGTTGCG-------------CCCGATGCC-ATTAGGTTGAGGGCACGTCTGCCTGGGTGTC---ACATAT----CGAAG--------------------CC---------------------CT----------TCCCCAAATT-----------------------------AAACTTGGT---------------GTGCAGGGTG----AATGATGGCT-TCCCGTGAG-----CCATTTGGTCTCATGGTTGGCTGAAAA----TTGAGACC-TTGGCA---GGGTGTG--CCAT-GATTAATGG----TGGTTGTGTGACGCACGAAGCCCAA-------TCATGATCATTAC-----…
37	>M01634_72_000000000-C3HGL_1_1101_15224_1926	M01634_72_000000000-C3HGL_1_1101_15224_1926	TGCAGAATCCCGTGAACCATCGAGTCTTTGAACGCA-AGTTGCG-------------CCCGAAGCC-ATTAGGCTGAGGGCACGCCTGCCTGGGTGTT---GCACAT----CGTTG--------------------CC---------------------CCAGTG------CCTTGGCCAC-----------------------------GTGCTAGGC------------ACCGAGCGGGGCG----AATGTTGGCT-TCCCGCGAG--------CAGCGTCTCACGGTTGGTTGAAAA----CTGAGTCC-GCGGTG---GAGGGCG--CCGT-GATGGATGG----TGGCTGAGTTAAAGCTCGAGACCGA-------------------------…
4	>M01634_72_000000000-C3HGL_1_1101_15572_14655	M01634_72_000000000-C3HGL_1_1101_15572_14655	TGCAGAATCCCGTGAACCATCGAGTCTTTGAACGCA-AGTTGCG-------------CCCCAAGCC-TTTTGGCCGAGGGCACGTCTGCCTGGGTGTC---ACAAAT----CGTCG--------------------TC---------------------CC---C------CATC--CTCT-----T-----------------------AAG---GAT----------------A-CGGGACG----GAAGCTGGTC-TCCCGTGTT----T---TACCG-AATGCGGTTGGCCAAAAT----CTGAGCTA-AGGACG-CCAGGAGTG--TCTC-GACATGCGG----TGGTG------------------AA----------------TTCA-----…
368	>M01634_72_000000000-C3HGL_1_1101_16005_5054	M01634_72_000000000-C3HGL_1_1101_16005_5054	TGCAGAATCCCGTGAACCATCGAGTCTTTGAACGCA-AGTTGCG-------------GCCGAAGCC-ATTTGGTTGAGGCCACGTCTGCCTGGGCGTC---ACGCAT--CGCGTCG-----CAAC-----------CG---------------------GC---C---CAAATCCACCTCT-----C-----------------------GGT---GATTTGAACT-----------GGGCGCG----GATATTGGCC-CCCCGTTTG--------CGCAAGCGCGCGGTTGGCCTAAAC----ACGAACCC-GAGGCG---GCTCGCG--TCAC-GACAAGTGG----TGGTT------------------GA------------GCACTCAA-----…
452	>M01634_72_000000000-C3HGL_1_1101_17254_1752	M01634_72_000000000-C3HGL_1_1101_17254_1752	TGCAGAATCTCGTGAACCATTATGTCTTTGAACAAA-AGTTGCG-------------TCCGAGGAC-TCCTGGTCGAGGGCATGTCTGCCTGTGTGTC---ACGCAT----CGTCG--------------------CC---------------------CC---C-------CTCCCCTCGGCTCAC-----------------------GAG---GGC------------------GGGGGCG----GATACTGGTC-TCCCGCGCG----C---TCCCG-CCCGTGGTTGGCCTAAAA----TCGAGTCC-CCGGCG---ACGGTCG--CCAC-GACAAGCGG----TGGTTGAG---------------AG-------------------------…
646	>M01634_72_000000000-C3HGL_1_1101_17266_14423	M01634_72_000000000-C3HGL_1_1101_17266_14423	TGCAGAATCCCGTGAACCATCGAGTCTTTGAACGCA-AGTTGCG-------------CCCCAAGCC-TTCTGGCCAAGGGCACGTTTGCCTGGGTGTC---ACAAAC----CGTCG-------T-C----------CC---------------------TC---T------CATC--CT-T-----C-----------------------TCG---GAT----------------A-TGGGACG----G-AA---G-----CC--------------AACA-CACGCGGTTGGCCAAAAT----CCGAGCTA-AGGGCG-CCTAGAGCA--TCAC-GACATGCGG----TGGTG------------------AA----------------CTAA-----…
483	>M01634_72_000000000-C3HGL_1_1101_17284_16023	M01634_72_000000000-C3HGL_1_1101_17284_16023	TGCAGAATCCTGTGAATCAATGAGTCTTTGAACGCA-AGTTGCG-------------CCCAAAGCC-TTTAGGCTGAGGGCACGTCTGCCTGGGCGTC---ACGTAT--CCCATCG-----TA-------------CC---------------------CC---A---ACCCGTCCTAACT-----T-----------------------GGGCATGAT-----------GGCTGGTGAGAGCG----GATATTGGCC-TCCCGTTTA--------CTCGC-GTTACGGTTGGTCTAAAA----TTGAGCCC-CGAGCG---ACGAACG--TCAC-GACAAGTGG----TGGTC------------TGTAATAG------------CTATTTCG-----…
724	>M01634_72_000000000-C3HGL_1_1101_17726_28276	M01634_72_000000000-C3HGL_1_1101_17726_28276	TGCAGAATCCCGTGAACCATCGAGTCTTTGAACGCA-AGTTGCG-------------CCCCAAGCC-TTCTGGCCGAGGGCACGTCTGCCTGGGTGTC---ACAAAT----CGTCG--------T-----------CC---------------------CC---C------CATC--CTCT-----C-----------------------GAG---GAT----------------A-TGGGACG----GAAGCTGATC-TCCCGTGTG----T---TACCG-CACGCGGTTGGCCAAAAT----CTGAGCTA-ACGACG-CCAGGAGCG--TCTT-GACATGCGC----TGGTG------------------AA----------------TTCA-----…
443	>M01634_72_000000000-C3HGL_1_1101_17810_13638	M01634_72_000000000-C3HGL_1_1101_17810_13638	TGCAAAATCCCGTGAACCATCGAGTTTTTGAATGCA-AGTTGCA-------------CCCGAAGCC-ATTAGGCAAAGGGCATGCCTACTTAGATGTC---ACACAC----TGTTG-------------------CCC---------------------CT---CCCCCCGCACCTCCCTT-----------------------------GGGAGCATT----------------A-GGGGTTG----GATAATGGCC-TTCATTGAG--------TCACCCCGCACGGTTGGCACAAAT----ACAGGTCC-TCGACG---ACGAACA--CCAC-AACAATCGG----TTGTTGTC---------------AA--------------TCCTCG-----…
389	>M01634_72_000000000-C3HGL_1_1101_18142_1918	M01634_72_000000000-C3HGL_1_1101_18142_1918	TGCAGAATCCCGTGAACCATCGAGTCTTTGAACGCA-AGTTGCG-------------CCCGATGCC-ATTAGGTTGAGGGCACGTCTGCCTGGGTGTC---ACATAT----CGAAG--------------------CC---------------------CT----------TCCCCAAATT-----------------------------AAACTTGGT---------------GTGCAGGGCG----AATGATGGC--T----T---------C-------C-C-------G-TGAAAA----TTGAGACC-TTGGCA---GGGTGTG--CCAT-GATTAATGG----TGGTTGTGTGACGCACGAAGCCCAA-------TCATGATCATTGC-----…
332	>M01634_72_000000000-C3HGL_1_1101_18188_13764	M01634_72_000000000-C3HGL_1_1101_18188_13764	TGCAGAATCCCGTGAACCATCGAGTCTTTGAACGCA-AGTTGCG-------------CCCCAAACC-TTCTGGCTGAGGGCACGTCTGCCTGGGTGTC---ACAAAT----CGTCG--------T-----------CC---------------------CC---C------CATC--CTCT-----C-----------------------GAG---GAT----------------A-TGGGACG----GAAGTTGATC-TCTCGTGTG----T---TACCG-CACGCGGTTGGCCAAAAT----CCGAGCTA-AGGACG-TCAGGAGCG--TCTT-GACATGCGG----TGGTG------------------AA----------------TTTA-----…
610	>M01634_72_000000000-C3HGL_1_1101_18214_3768	M01634_72_000000000-C3HGL_1_1101_18214_3768	TGCAGAATCCCGTGAACCATCGAGTCTTTGAACGCA-AGTTGCG-------------CCCGAAGCC-ATCAGGCCGAGGGCACGCCTGCCTGGGCGTC---ACACGC----CGTTG--------C-----------CC---------------------CC---C------CCGCATCCCT-----C-----------------------GGG---AGC-----------GTCGGG-AGGGGCG----GACGATGGCC-TCCCGTGCG----T---CACCC-CGCGCGGTTGGCACAAAT---GCCGGGTCC-TCGGCG---ACGAACG--CCAC-GACAATCGG----TGGTCG--------TCGAACCTCGG-----------------TTG-----…
195	>M01634_72_000000000-C3HGL_1_1101_18830_2179	M01634_72_000000000-C3HGL_1_1101_18830_2179	TGCAGAATCCCGTGAACCATCGAGTCTTTGAACGCA-AGTTGCG-------------CCCGAAGCC-ATTAGGCTAAAGGCACGTCTGCCTGGGCGTC---ACGCAT-CT-CGTCA---------------------C---------------------CA---C---ATCCCTAATTTTT-----------------------------GTGGATCGT------------------TGGAATG---------TGACC-TCCTGC-------T---CCTAGTTGTGCAGTTGGTTAAAAC----TTGAGTATGTGGATT----AGGACT--TCAC-GACAAGTGG----TGGTTGGAT--------------AA------------CAACTCTC-----…
212	>M01634_72_000000000-C3HGL_1_1101_19285_2213	M01634_72_000000000-C3HGL_1_1101_19285_2213	TGCAGAATCCCGTGAACCATCGAGTCTTTGAACGCA-AGTTGCG-------------CCCGAAACC-ATTAGGTCGAGGGCACGTCTGCCTGGGTGTC---ACACAT----CGTTG--------------------CC---------------------CC---A---------ACGCCAA-----ATGCT--TCGTGCT------ATGCG-G---CGT----------------G-CGGGGTG----AATGTTGGCC-TCCCGCGAG----C---TAAGG-CTCACGGTTGGCTTAAAT----TTGGGTCC-ATGGTA---GGGTATG--CCAT-GATGGATGG----TGGTTGAG-TAACGCTCGAGACCAA-----------------TCA-----…
228	>M01634_72_000000000-C3HGL_1_1101_19411_6853	M01634_72_000000000-C3HGL_1_1101_19411_6853	TGCAGAATTCCGTGAACCATCGAGTCTTTGAACGCA-AGTTGCG-------------CCCCAAGCT-TTCTGGCTGAGGGCACGTCTGCCTGGGTGTC---ACAAAT----ATTCG-------T------------CC---------------------CT---C------TATA--CTCT-----C-----------------------GAG---GAT----------------A-GGGGACG----GAAGCTGATC-TCCCATGTG----T---TTCCG-CACGCTGTTGGCCAAAAT----CCGAGCTA-AGGACG-CCAGGAGCG--TCTT-GACATGCGG----TGGTG------------------AA----------------TTCA-----…
459	>M01634_72_000000000-C3HGL_1_1101_19730_2192	M01634_72_000000000-C3HGL_1_1101_19730_2192	TGCAGAATCCCGTGAATCACCGAGTCTTTGAACGCA-AGTTGCG-------------CCCAAAGCC-TTTAGGTTGAGGGCACGTCTGCCTGGGCGTC---ACGTAT--CCCGTCG-----CAC------------CC---------------------CC---A---ACCCGTCCCAACT-----C-----------------------GGGCATGAT-----------GGCTGGTGGGAGCG----GATATTGGCC-TCCCGTGTA--------CTCGC-GTTACGGTTGGTCTAAAA----TTGAGCCC-CGAGCA---ACGAACG--TCAC-GACAAGTGG----TGGTC------------TGTAATAG------------CTATTTCG-----…
291	>M01634_72_000000000-C3HGL_1_1101_19770_26700	M01634_72_000000000-C3HGL_1_1101_19770_26700	TGAAGAATCCCGTGAACCATCGAGTCTTTGAATGCA-AGGTGCG-------------CCCGAAGCC-ATTAGGCCGAGGGCATGCCTGCTTGGTTGTT---GCACAT----CGTTG--------------------CC---------------------CC---C---GTGCCTTGGCCAT-----GTGCC-------------------TGG---CAC-----------TA--AG-CAGGGCA----AATGTTGGCT-TTATGCGAG----C---AATGT-CTCACGGTTGGTTGAAAA----CTGAGTCC-GCGGTG---GAGGGCG--CCGT-GACGAATGG----TGGCTGAGTTAAAGCTCGAGATCGA-----------------TCG-----…
3	>M01634_72_000000000-C3HGL_1_1101_19995_10690	M01634_72_000000000-C3HGL_1_1101_19995_10690	TGCAGAATCCCGTGAACCATCGAGTCTTTGAACGCA-AGTTGCG-------------CCCGAAGCC-ATTAGGCCGAGGGCACGTCTGCCTGGGCGTC---ACGCAT--CGCGTCG--------------------CC---------------------CC---C---ACTCCCC--CCAA-----------------------------GGGGCGAGC------------------GGGGGCG----GAGATTGGCC-CCCCGTGCG--CGCATCCCGCG-CGCGCGGCCGGCCCAAAT----GCGAATCCGCCGTCG---ACGCACG--TCGC-GACCAGTGG----TGGTT------------------GA------------ATCCTCAA-----…
196	>M01634_72_000000000-C3HGL_1_1101_20313_2677	M01634_72_000000000-C3HGL_1_1101_20313_2677	TGCAGAATCCCGTGAACCATCGAGTCTTTCAACGCA-AGTTGCG-------------CCCAAAGCC-ATTAGGCTATCAGCACGTCTGCCTAGGCGTC---ACACAT---ATGTGG-------------------------------------------AT---T---------------------------------------------AGG---AAT-----------------TCACGACA----AGTGGTGGTT-----GGATAACAAC---TCTCGTCATGTCGTGTGCCAAACC--TACTTGACTT-TCAATA------------CCCT-AAGGTGCAA------GTT------------------AA-------------------------…
352	>M01634_72_000000000-C3HGL_1_1101_20380_2671	M01634_72_000000000-C3HGL_1_1101_20380_2671	TGCAGAATCCCGTGAACCATCGAGTCTTTGAACACGTCGTTGCC-------------CCCCCGACC------------------CCTTCC--GGAGTC----------------------------------------------------------------------------------------------------------------GGG------------------------CGGGACG----GATGGTGATC-TCCCGTGCG---------CCAGTCGCGCGGTTGGTCTAAAT---ATCGAGTCC-CCGGCG---ACCGGCG--CCGC-GACAATCGG----TGGTTGT----------------GA------------GACCTCGG-----…
716	>M01634_72_000000000-C3HGL_1_1101_20452_5070	M01634_72_000000000-C3HGL_1_1101_20452_5070	CGAGATCTACACACTATCTGCCTGGTGCTGGTATGCGATACTTGGTGTGAATTGCAGAATCCCGTGAACCATCGAGTCTTTGAACGCA-AGTTGCG-------------CCCCAAGCC-TTCTGGCCGAGGGCACGTCTGCCTGGGTGTC---ACAAAC----CGTCG--------------------TC---------------------CC---T---CTCATCCTTCTCG-----------------------------------GAT----------------A-TGGGACG----GAAATTGGTC-TCCCGTGTG----T---TACCG-CACGCGGTTGGCCAAAAT-----------------------------------------------…
182	>M01634_72_000000000-C3HGL_1_1101_21153_2849	M01634_72_000000000-C3HGL_1_1101_21153_2849	TGCAGAATCCCGTGAACCATCGAGTCTTTGAACGCA-AGTTGCG-------------CCCGAAGCC-GTTAGGCCGAGGGCACGTCTGCCTGGGCGTC---ACACGT----CGTTG--------------------CC---------------------CC---C---C--CGAC-CCCTT-----C-----------------------GGG---GGT-----------CG--GA-CGGGACG----GATGATGGCCTTCCCGTGTG--------CCCTGTCACGCGGTTGGCATAAAT---ACCGAGTCC-TCGGCG---ACCGGCG--TCGC-GGCGATCGG----TGGTTGT----------------CA------------AACCTCGG-----…
668	>M01634_72_000000000-C3HGL_1_1101_21279_10624	M01634_72_000000000-C3HGL_1_1101_21279_10624	TGCGGAATCCCGTGAACCATCGAGTCTTTGAACGCA-AGTTGCG-------------CCCCAAGCC-TTCTGGCCGAGGGCACGTCTGCCTGGGTGTC---ACAAAT----CGTCG--------T-----------CC---------------------CC---C------CATC--CTCT-----C-----------------------GAG---GAT----------------A-TGGGACG----GAAGCTGATC-TCCCGTGTG----T---TACCG-CACGCGGTTGGCCAAAAT----CCAAGCTA-AGGACG-TCAGAAGCG--TCTT-GACATGCGG----TGGCG------------------AA----------------TTCA-----…
137	>M01634_72_000000000-C3HGL_1_1101_21937_23915	M01634_72_000000000-C3HGL_1_1101_21937_23915	TGAAGAATCCCATGAACCATCGAGTCTTTGAACGCA-AGTTGCA-------------CCCCAAGCC-TTCTGGCCGAGGGCACGTATGCCTGGGTGTC---ACAAAT----CGTCG--------T-----------CC---------------------CC---C------CATC--CTCT-----C-----------------------GAG---GAT----------------A-TGGGACG----GAAGCTGATC-TCCCGTGTG----T---TACCA-TACGCGGTTGGCCAAAAT----CCGAGCTA-AGGACG-CCAGGAGCG--TCTT-GACATGCGG----TGGTG------------------AA----------------TTCA-----…
369	>M01634_72_000000000-C3HGL_1_1101_22033_24500	M01634_72_000000000-C3HGL_1_1101_22033_24500	TGCAGAATCCCGTGAACCATCGAGTCTTTGAACGCA-AGTTGCG-------------CCCGAAGCC-TTCTGGCTGAGGGCACGTCTGCCTGGGCGTC---ACGCAT--CGCGTCG-----CA-------------TC---------------------CC---A---ACTCGCCTCCTTC-----------------------------GGGAGCAGT-------------AGAGTGGGATCG----GATATTGGTC-CCCCGTGCG--------CACCAGCGCGCGGTCGGCCTAAAT----GCGAACCC-GCGGCG---ACTCGCG--TCGC-GACAAGTGG----TGGTT------------------GA------------GCACTCAA-----…
192	>M01634_72_000000000-C3HGL_1_1101_23205_24894	M01634_72_000000000-C3HGL_1_1101_23205_24894	TGCAGAATCCCGTGAACCATCGAGTCTTTGAACGCA-AGTTGCG-------------CCCGAAGCC-ATTAGGTTGAGGGCACGTCTGCCTGGGTGTC---ACGTAT-CG-TGTTG--------------------CC---------------------CC---C----AACCACTC-ACT-----CCTCT-------------------GGG---AGC-TATTCCG---GT--TT-AGGGGCG----GAAATTGGCC-TCCCGTAC---------CTTGC-GGTGCGGATGGCACAAAA----GTGAGTCT-CCGATG---ACGGACG--TCGT-GACAT-TGG----TGGTTGTT-------------AAAA------------GAACTTCT-----…
57	>M01634_72_000000000-C3HGL_1_1101_23465_11484	M01634_72_000000000-C3HGL_1_1101_23465_11484	TGCAGAATCCCGTGAACCATCGAGTCTTTGAACGCA-AGTTGCG-------------CCCGATGCC-ATTAGGTTGAGGGCACGTCTGCCTGGGTGTC---ACATAT----CGAAG--------------------CC---------------------TC---C---TGCCAATTTCCCT---------------------------TTGATTATTGT----------------G-CAGGGTG----GATGTTGGCC-TCCCGTGAA----CTCTTTTTG-GTCATGGTTGGTTGAAAA----TTGAGACC-TTGGTA---GGGTGTG--CCAT-GATAGATGG----TGGTTGTGT--------------GA----------------TCCA-----…
519	>M01634_72_000000000-C3HGL_1_1101_24117_11083	M01634_72_000000000-C3HGL_1_1101_24117_11083	TGCAGAATCCCGTGAATCACCGAGTCTTTGAACGCA-AGTTGCG-------------CCCGAGGCC-TCCTGGTCGAGGGCACGTCTGCCTGGGTGTC---ACGCAT----CGTCG--------------------CC---------------------CC---C------GCTCCCCTCGGCTCAC-----------------------GAG---GGC------------------GGGGGCG----GATACTGGTC-TCCCGCGCG----C---TCCCG-CCCGTGGTTGGCCTAAAA----TCGAGCCC-CGAGCG---ACGAACG--TCAC-GACAAGTGG----TGGTC------------TGTAATAG------------CTATTTCG-----…
454	>M01634_72_000000000-C3HGL_1_1101_24207_11842	M01634_72_000000000-C3HGL_1_1101_24207_11842	TGCAGAATCCCGTGAACCATCGAGTCTTTGAACGCA-AGTTGCG-------------CCCGAGGCC-TCCTGGTCGAGGGCACGTCTGCCTGGGTGTC---ACGCAT----CGTCG--------------------CC---------------------CC---C------GCTCCCCTCGGCTCAC-----------------------GAG---GGC------------------GGGGGCG----GATACTGGTC-TCCCGCGCG----C---TCCCG-CCCGTGGTTGGCCTAAAA----TCGAGTCC-CCGGCG---ACGGTCG--CCAC-GACAAGCGG----TGGTTGAG---------------AG-------------------------…
239	>M01634_72_000000000-C3HGL_1_1101_24782_14634	M01634_72_000000000-C3HGL_1_1101_24782_14634	TGCAGAATCCCGTGAACCATCGAGTCTTTGAACGCA-AGTTGCG-------------CCCTAGGCC-TTCTGGTCGAGGGCACGTCTGCCTGGGCGTC---ACGCAC--AGCGTCG--------------------CC---------------------CC---C---C--AATCCACACTTGTTGT-----------------------------GGT----------------AGGGGAGCG----GAGATTGGCC-CCCCGAGCC----C---TCGCG-GGCGCGGTCGGCACAAAT----GCTGGTCC-CTGGCA---GCGGTCG--CCGCGGTCAAGTGG----TGGCT---------TCAAATACCAT------------TTCGGTGA-----…
172	>M01634_72_000000000-C3HGL_1_1101_25076_7787	M01634_72_000000000-C3HGL_1_1101_25076_7787	TGCAGAATCCCGTGAACCATCGAGTTTGTGAACGCA-AGTTGCA-------------CCCCAGGCC-TTCTGGCCGAGGGCACGTCTGCCTGGGTGTC---ACAAGT----CGTCG--------T-----------CC---------------------CC---C------AATC--CTCT-----C-----------------------GAG---GAT----------------A-TGGGACG----GAAGCTGATC-TCCCGTGTG----T---TGCCG-CACGCGGTTGGACAAAAT----CCGAGCTA-AGGACG-CAAGGAGCG--TCTT-GACATGCGG----TGGTG------------------AA----------------TTTA-----…
49	>M01634_72_000000000-C3HGL_1_1101_25474_7714	M01634_72_000000000-C3HGL_1_1101_25474_7714	TCCAGAATCCTGTGAACCATCGAGTCTTTGAACGCA-AGTTGCG-------------CCCCAAGCC-TTCTGGCCGAGGGCACGTCTGCTTGGGTGTC---ACAAAT----CATTG--------T-----------CC---------------------CC---C------CATC--CTCT-----C-----------------------GAG---GAT----------------A-TGGGATG----GAAGCTGATC-TCCTGTGTG----T---TACCG-CACGCGGTTGGCCAAAAT----CCAAGCTA-AGGACG-TCAGGAGCG--TCTT-GACATGCGG----TGGTG------------------AA----------------TTTA-----…
28	>M01634_72_000000000-C3HGL_1_1101_25554_23300	M01634_72_000000000-C3HGL_1_1101_25554_23300	TGCAGAATCCCGTGAACCATCGAGTCTTTGAACGCA-AGTTGCG-------------CCCGAAGCC-TTCTGGCTGAGGGCACGTCTGCCTGGGCGTC---ACGCAT--CGCGTCG-----CA-------------TC---------------------CC---A---ACTCGCCTCCTTC-----------------------------GGGAGCAGT-------------AGAGTGGGATCG----GATATTGGTC-CCCCGTGCG--------CACCAGCGCGCGGTCGGCCTAAAT----GCGAACCC-GCGGCG---ACTCGCG--TCGC-GACAAGTGG----TGGTT------------------GA------------ACTCTCAA-----…
7	>M01634_72_000000000-C3HGL_1_1101_25659_20616	M01634_72_000000000-C3HGL_1_1101_25659_20616	TGCAGAATCCCGTGAACCATCGAGTTTTTGAACGCA-AGTTGCG-------------CCCGAGACC-TTTAGGTTGAGGGCACGTCTGCCTGGGCGTC---ACACAC--AGCGTCG--------------------TT---------------------CCACAC------CAACCTAGTT-----------------------------------GGT----------------A-GAGAGCG----GATATTGGCC-CCCCGAGTC--------CTTTG-GGCACGGTCGGCACAAAT----ATTGGTCC-TCGGCA---GCGAGTG--TCGC-GGTCAGCGG----TGGTTGTATTTCCTCCAAAGACAAA---------TGACGCGTTC------…
234	>M01634_72_000000000-C3HGL_1_1101_25779_9031	M01634_72_000000000-C3HGL_1_1101_25779_9031	TGCAGAATCCCGTGAACCATCGAGTCTTTGAACGCA-AGTTACG-------------CCCCAAGTC-TTCTGGTCGAGGGCACGTCTGTCTGGGTGTC---ACAAAT----TGTCG--------T-----------CC---------------------CC---C------CATC--CTCT-----C-----------------------GAG---GAT----------------A-TGGGACG----GAAGCTGATC-TCCCGTGTG----T---TACCG-CACGCGGTTGGCCAAAAT----CCTAGCTA-AGGACG-CCAGGAGCG--TCTT-GACATGCGG----TGGTG------------------AA----------------TTCA-----…
472	>M01634_72_000000000-C3HGL_1_1101_25849_7698	M01634_72_000000000-C3HGL_1_1101_25849_7698	TGTAGAATCTCGTGAATCACCGAGTCTTTGAACGCA-AGTTGCG-------------CCCAAAGCC-TTTAGGCTGAGGGCACGTCTGCCTGGGCGTC---ACGTAT--CCCGTCG--------------------------------------------C-------A-CC--CCCAACT-----C-----------------------GGGCATGAT-----------GGCTGGTGGGAGCG----GATATTGGCC-TCCCGTGTA--------CTCGC-ATTATGGTTGGTCTAAAA----TTGAGCTC-CGAGCG---ACGAACA--TCAA-GATAAGTGT----TGGTC------------TGTAATAG------------CTATTGCG-----…
687	>M01634_72_000000000-C3HGL_1_1101_26114_6616	M01634_72_000000000-C3HGL_1_1101_26114_6616	TGCAGAATCTCGTGAACCATCGAGTCTTTGAACGCA-AGTTGCG-------------CCCGAAGCC-ATTAGGCCGAAGGCACGTCTGCCTGGGCGTC---TCGCAA--CGCGTCG--------------------CC---------------------CC---C------AACCCCCCCC-----------------------------GGGTGTGTT------------------GTGGGCG----GATGATGGCC-TCCCGTGCG--------CGAAAGCCCGCGGCTGGCCTAAAA----GTGAAGTCCCCGACG--ATGGATCG--TCAC-GACACGTGG----TGGTTGAAC--------------AA-------------------------…
138	>M01634_72_000000000-C3HGL_1_1101_26213_12828	M01634_72_000000000-C3HGL_1_1101_26213_12828	TGCAGAATCCCGTGAACCATCGAGTCTTTGAACGTA-AGTTGCG-------------CACCAAGCC-TCCTGGCCGAGGGCACGTCTACCTGGGTGTC---ACAAAT----CATCG--------T-----------CC---------------------CC---C-------ATT--CTCT-----C-----------------------GAG---GAT----------------A-TGGGACG----GAAGCTGATC-TCCCATGTG----T---TACCG-CACGCGGTTGGCCAAAAT----ACGAGCTA-ATGACG-CCAGGAGCA--TCTT-GACATGCGG----TGGTG------------------AA----------------TTCA-----…
61	>M01634_72_000000000-C3HGL_1_1101_27388_18022	M01634_72_000000000-C3HGL_1_1101_27388_18022	TGCAGAATCCCGTGAACCATCGAGTCTTTGAACGCA-AGTTGCG-------------CCCGAAGCC-ATTAGGCCGAGGGCACGCCTGCCTGGGTGTT---GCACAT----CG-T------------------------------------------------------TGCC----CC-C-----GTGCC-------------------AGG---CAC-----------CA--AG-CGGGGCG----AATGTTGGCT-TCCCGCGAG----C---AATGT-CTCACGGTTGGTTGAAAA----CTGAGTCC-GCGGTG---GAGGGCG--CCGT-GATGGATGG----TGGCTGAGTTAAAGCTCGAGACCGA-----------------TCG-----…
442	>M01634_72_000000000-C3HGL_1_1101_27567_16325	M01634_72_000000000-C3HGL_1_1101_27567_16325	TGCAGAATCCCGTGAACCATCGAGTCTTTGAACACA-AGTTGCG-------------CCCCAAGCC-TTCTGGCCGAGGGCACGTCTGCCTGGGTGTC---ACAAAT----CGTCG-------------------TCC---------------------CC---C------AATC--CTCT-----C-----------------------GAG---GAT----------------A-TGGGACG----GAAGCTGATC-TCCCGTGTG----T---TACCG-TACGCGGTTGGCCAAAAT----CCAAGCTA-AGGACG-CCAGAAGCG--TCTT-GACATGCGG----TGGTG------------------AA----------------TTTA-----…
10	>M01634_72_000000000-C3HGL_1_1101_27716_15208	M01634_72_000000000-C3HGL_1_1101_27716_15208	TGCAGAATCCCGTGAACCATCGAGTCTTTGAACGCA-AGTTGCG-------------CCCGAAGCC-ATTAGGCCGAGGGCACGCCTGCCTGGGCGTC---ACACGC----CGTTG--------------------CC---------------------CC---C---CCACGCC-TCCCT-----C-----------------------GGG---AGC-------------GTCG-GGGGGCG----GACGATGGCC-TCCCATGCG----T---CACCC-CGCGTGGTTGGCACAAAT---GACGAGTCC-TCGGCG---ACGAACG--CCAC-GACAATCGG----TGGTTGT----------------CA------------AACCTCGG-----…
68	>M01634_72_000000000-C3HGL_1_1101_28011_11134	M01634_72_000000000-C3HGL_1_1101_28011_11134	TGCAGAATCCCGTGAACCATCGAGTCTTTGAACGCA-AGTTGCG-------------CCCGAAGCC-ATTAGGCCAAAGGCACGTCTGCCTGGGCGTC---ACGCAT-CT-CGTCA--------------------CC---------------------GC---A---T--CATTAATTTT-----T-----------------------GTG---TAT--------------------CGGTG----GAATGTGACC-TCCTGC-------T---CCTAGTTGTGCAGTTGGTTAAAAC----TTGAGTATGTGGATT---ATGACT---TCAT-GACAAGTGG----TGGTTGGATA-------------AC------------AACTCTCG-----…
242	>M01634_72_000000000-C3HGL_1_1101_28753_12644	M01634_72_000000000-C3HGL_1_1101_28753_12644	TGCAGAATCCCGTGAACCATCGAGTCTTTGAACGCA-AGTTGCG-------------CCCGAAGCC-ATTAGGCCGAGGGCACGCCTGCCTGGGCGTC---ACACGT----CGTTG--------------------CC---------------------CC---C------CCAAACCCCT-----C-----------------------GGG---AGT--------------TGGGCGGGACG----GATGATGGCC-TCCCGTGTG--------CTCTGTCATGCGGTTGGCATAAAA----ACAAGTCC-TCGGCG---ACTAACG--CCAC-GACAATTGG----TGGTTGTC---------------AA-------------ACCTCTG-----…
130	>M01634_72_000000000-C3HGL_1_1101_28862_12548	M01634_72_000000000-C3HGL_1_1101_28862_12548	TGCATAATCCCGTTAGCCATCGAGTCTTTGAACGCA-AGTTGTG-------------CCCCAAGCC-TTCTGGCCGAGGACACGTCTGCCTGGGTGTC---ACAAAT----CGTCG-------T------------CC---------------------CC---C------CATC--CTCT-----C-----------------------GAG---GAT----------------A-TCGGACG----GAAGCTAGTC-TCCCATGTG----T---TACCA-TACGCGGTTGGCCAAAAT----CTGAGCTA-AGGATG-TCAGGAGCG--TCTT-TACATGCGG----TGGTG------------------AA----------------TTCA-----…
455	>M01634_72_000000000-C3HGL_1_1101_2992_19043	M01634_72_000000000-C3HGL_1_1101_2992_19043	TGCAGAATCCCGTGAACCATCGAGCCTTTGAACGCA-TGTTGAG-------------CCCGAGGCC-TCCTGGTTGAGGGCACATCTGCTTGGGTGTC---ACACAT----CATCG--------------------CC---------------------CC---T------ACTCCCCTCGGCTCAT-----------------------GAG---GGC------------------GGGGGCG----GATACTGGTC-TCCCGCACG----A---TCCCG-CCCATGGTTGGCCTAAAA----TCGAGTCC-CCGGCG---ACGGTCG--CCAC-GACAAGCGG----TGGTTGAG---------------AG-------------------------…
6	>M01634_72_000000000-C3HGL_1_1101_3234_13986	M01634_72_000000000-C3HGL_1_1101_3234_13986	TGCAGAATCCCGTGAACCATCGAGTCTTTGAACGCA-AGTTGCG-------------CCCCAAGCC-TTCTGGCCGAGGGCACGTCTGCCTGGGTGTC---ACAAAC----CGTCG-------T-C----------CC---------------------TC---T------CATC--CT-T-----C-----------------------TCG---GAT----------------A-TGGGACG----GAAACTGGTC-TCCCGTGTG----T---TACCG-CACGCGGTTGGCCAAAAT----CCGAGCTA-AGGGCG-CCTAGAGCG--TCAC-GACATGCGG----TGGTG------------------AA----------------CTAA-----…
465	>M01634_72_000000000-C3HGL_1_1101_4039_18063	M01634_72_000000000-C3HGL_1_1101_4039_18063	TATAGAATCTCGTGAATCACCAAGTCTTTGAACGCA-AGTTGTG-------------CCCAAAGCC-TTTAGGCTGAGGGCACGTCTGTATGGGCGTC---ATGTAT--CCCGTCG-----CAC------------CC---------------------CT---A---ACCCATGCCAACT-----C-----------------------GGGCATGAT-----------GGCTGGTGGGAGTG----GATATTGTCC-CTCCATGTA--------CTCGC-ATTACAGTTGGTTTAAAA----TTGAGCCC-CGAGCG---ATGAATG--TTAT-GACAAGTGG----TGGTC------------TGTAATAG------------CTATTTCG-----…
183	>M01634_72_000000000-C3HGL_1_1101_5873_10443	M01634_72_000000000-C3HGL_1_1101_5873_10443	TGCAGAATCCCGTGAACCATCGAGTCTTTGAACGCA-AGTTGCG-------------CCCGAAGCC-ATTAGGCCGAGGGCACGCCTGCCTGGGCGTC---ACACGC----CGTTG-----CTCCC----------CC---------------------CC---G------CACC-TCCAT-----C-----------------------GGG---AGC-----GTC-GGT---GG-GGGGGCG----GACGATGGCC-TCCCGTGCG----T---CACCC-CGCGCGGCTGGCATAAAT---GCCGAGTCC-TCGGCG---ACGAACG--CCAC-GACAATCGG----TGGTTG---------------TCGA------------A-CCTCGG-----…
21	>M01634_72_000000000-C3HGL_1_1101_6137_18715	M01634_72_000000000-C3HGL_1_1101_6137_18715	TGCAGAATCCCGTGAACCATCGAGTCTTTGAACGCA-AGTTGCG-------------CCTGAAGCC-ATTAGGCCAAGGGCACGTCTGCCTGGGCGTC---ACGCAT-CG-CGTCA--------------------CC---------------------CC---T------CCTCCTATTT-----C-----------------------------GGT------------G--GA-TGGGGTG----GAATGTGACC-TCCTGTG----------CCGAGAGGTGCAGCTGGTCGAAAT----TTGAGTCC-GGAGCT---TAGGATG--TCAC-GGCAAGTGG----TGGTTGGA---------------TA------------ACAACTCG-----…
63	>M01634_72_000000000-C3HGL_1_1101_6147_8419	M01634_72_000000000-C3HGL_1_1101_6147_8419	TGCAGAATCCCGTGAACCATCGAGTCTTTGAACGCA-AGTTGCG-------------CCCCAAGCC-TTTTGGCCGAGGGCACGTCTGCCTGGGTGTC---ACAAAT----CGTCG-------------------TCC---------------------CC---C------CATCCATTTT------------------------------TG---GAT----------------A-CGGGACG----GAAGCTGGTC-TCCCGTGTG----G---TACCG-CACGCGGTTGACCAAAAT----CCGAGCTT-AGGACG-TCAAGAGCG--TCTC-GACATGCGG----TGGTG------------------AA----------------TTCA-----…
372	>M01634_72_000000000-C3HGL_1_1101_7147_15665	M01634_72_000000000-C3HGL_1_1101_7147_15665	TGCAGAATCCCGTGAACCGTCAAGTTTTTGAACACA-AGTTGCG-------------CCCGAGGCC-TCCTGATCGAGGGCACTTCTGCCTGGGTGTC---ACGCAT----CATCG--------------------CC---------------------AC---C------ACTCTCCTCGACTCAC-----------------------GAG---GAC------------------AAGGGCG----AATACTGGTC-TCCCGCGCG----C---TCCCG-CCCGTAGTTGCCCTAAAA----TTGAGTCC-TTGGCG---ACCATCG--CCAC-GACAAGCGG----TGGTTGA----------------GA------------GACCCTCG-----…
551	>M01634_72_000000000-C3HGL_1_1101_7575_11734	M01634_72_000000000-C3HGL_1_1101_7575_11734	CGCAGAATCCCGTGAACCATCGAGTCTTTGAACGCA-AGTTGCG-------------CCCGAAACC-ATTAGGTTGAGGGCACGTCTGCCTGGGTATC---ACACAT----CGTTG--------------------CC---------------------CC---A---------ACGCCAA-----ATGCT--TTGTGCC------ATGCG-G---CGT----------------G-TGGGGTG----AATGTTGGCC-TCCCGCGAG----C---TAAGG-CTCACGGCTGGTTTAAAT----TTGGGTCC-ATGGTA---GGGTATG--CCAT-GATGGATGG----TGGTTGAG-TAACGCTCGAGACCAA-----------------TCA-----…
8	>M01634_72_000000000-C3HGL_1_1101_8150_25099	M01634_72_000000000-C3HGL_1_1101_8150_25099	TGCAGAATCCCGTGAACCATCGAGTCTTTGAACGCA-AGTTGCG-------------CCCGATGCC-ATTAGGTTGAGGGCACGTCTGCCTGGGTGTC---ACATAT----CGAAG--------------------CC---------------------CT----------TCCCCAAATT-----------------------------AAACTTGGT---------------GTGCAGGGTG----AATGATGGCT-TCCCGTGAG-----CCATTTGGTCTCATGGTTGGCTGAAAA----TTGAGACC-TTGGCA---GGGTGTG--CCAT-GATTAATGG----TGGTTGTGTGACGCACGAAGCCCAA-------TCATGATCATTGC-----…
731	>M01634_72_000000000-C3HGL_1_1101_9117_15722	M01634_72_000000000-C3HGL_1_1101_9117_15722	CGAGATCTACACTAGCGAGTCCTGGTGCTGGTATGCGATACTTGGTGTGAATTGCAGAATCCCGTGAACCATCGAGTCTTTGAACGCA-AGTTGCG-------------CCCCAAGCC-TTCTGGCCGAGGGCACGTCTGCCTGGGTGTC---ACAAAC----CGTCG--------------------TC---------------------CC---T---CTCATCCTTCTCG-----------------------------------GAT----------------A-TGGGACG----GAAATTGGTC-TCCCGTGTG----T---TACCG-CACGCGGTTGGCCAAAAT-----------------------------------------------…
654	>M01634_72_000000000-C3HGL_1_1101_9143_12295	M01634_72_000000000-C3HGL_1_1101_9143_12295	TGCAGAATCCCGTGAACCATCGAGTTTTTGAACGCA-AGTTGCG-------------CCCGAAGCC-TTTTGGCCGAGGGCACGTCTGCCTGGGCGTC---ACGCAT-CG-CGTCG--------------------CC---------------------CC---C---CACAATTATTTGT-----T------------------------------------------------T-GGGGGCG----GATATTGGTC-TCCCGTGCT--------CATGG---CGTGGTTGGCCGAAAT----AGGAGTCC-----CTTCGATGGACG---CACAAACTAGTGG----TGGTCGTA---------------AA------------AACCCTCG-----…
245	>M01634_72_000000000-C3HGL_1_1101_9289_6469	M01634_72_000000000-C3HGL_1_1101_9289_6469	TGCAGAATCCCGTGAATCATCGAGTCTTTGAACGCA-AGTTGCG-------------CCCGAAGCC-TTTTGGCCGAGGGCACGTCTGCCTGGGTGTC---ACGCAA----CGTCG--------------------CC---------------------GC---C---AA-CGCCGCCCTT-----------------------------AGG---GGC----------GCGCAGTTGGGGGCG----GAATATGGCC-TCCCGTGCG--------CCTCGGCGCGCGGTTGGCCTAAAT----ATCAACCC-CCGGCG---AGGATCG--CCAC-GACAAGCGG----TGGTTTTTTCAACG---------AA------------GGACCTCG-----…
645	>M01634_72_000000000-C3HGL_1_1101_9402_4850	M01634_72_000000000-C3HGL_1_1101_9402_4850	AGCAGAATCCCGTGAACCATGGAGTCTTTGAACGCA-AGTTACG-------------CCCAAAGCC-TTATGGCCGAGGGCACGTCTGCCTGGGTGTC---ACAAAT----CGTCG-------------------TCC---------------------CC---C------CATC--CTCT-----C-----------------------GAG---GAT----------------A-TGGGACG----GAAGCTGATC-TCCCGTGTG----T---TACCG-CACGCGGTTGGCCAAAAT----CCAAGCTA-AGGACG-TCAGAAGTG--TCTT-GACATGCGG----TGGTG------------------AA----------------TTTA-----…
557	>M01634_72_000000000-C3HGL_1_1102_10587_12830	M01634_72_000000000-C3HGL_1_1102_10587_12830	TGCAGAATCCCGTGAACCATCGAGTCTTTGAACGCA-AGTTGCG-------------CCCGATGCC-ATTAGGTTGAGGGCACGTCTGCCTGGGTGTC---ACATAT----CGAAG--------------------CC---------------------CT----------TCCCCAAATT-----------------------------AAACTTGGT---------------GTGCAGGGTG----AATGATGGCT-TCCCGTGAG-----CCATTTGGTCTCATGGTTGGCTGAAAA----TTGAGACC-TTGGCA---GGGTGTG--CCAT-GCATATCAA----TAAGCGGAGGAGGC-TGACTGACTG-------TC-TGCTAATCTCG----…
398	>M01634_72_000000000-C3HGL_1_1102_11103_7793	M01634_72_000000000-C3HGL_1_1102_11103_7793	TGCAGAATCCCGTGAACCATCGAGTCTTTGAACGCA-AGTTGCG-------------CCCCAAGCC-TTCTGGCCGAGGGCACGTCTGCCTGGGTGTC---ACAAAT----CGTCG--------T-----------CC---------------------CC---C------CATC--CTCT-----C-----------------------GAG---GAT----------------A-TCGGACG----GAAGCTGGTC-TCCCGTGTG----T---TACCG-CACGCGGTTGGCCAAAAT----CCTAGCTA-AGGATG-CCAGGAGCG--TCTT-GACATGCGG----TGGTG------------------AA----------------TTTA-----…
578	>M01634_72_000000000-C3HGL_1_1102_11847_24186	M01634_72_000000000-C3HGL_1_1102_11847_24186	TGCAGAATCCCGTGAACCATCGAGTCTTTGAACGCA-AGTTGCG-------------CCCCAAGCC-TTCTGGCCGAGGGCACGTCTGGCTGGGTGTC---ACAAAT----ATTCG-------T------------CC---------------------CC---C------CATC--CTCT-----T-----------------------GAG---GAA----------------A-GGGGATG----GAAGCTGATC-TCCCGTGTG----T---TACCG-CATGCGGTTGGCCAAAAT----CCAAGCTA-AGGATG-CCAGGAGCG--TCTT-GACATGCGG----TGGTG------------------AA----------------TTCA-----…
193	>M01634_72_000000000-C3HGL_1_1102_12058_18032	M01634_72_000000000-C3HGL_1_1102_12058_18032	TGCAGAATCCCGTGAACCATCGAGTCTTTGAACGCA-AGTTGCG-------------CCCGAAGCC-GTTAGGCCGAGGGCACGTCTGCCTGGGCGTC---ACACGT----CGTTG--------------------CC---------------------CC---C-----CCGACCCCTTC-----------------------------GGG---GGT--------------CGGACGGGACG----GATGATGGCCTTCCCGTGTG--------CCCCGTCACGCGGTTGGCATAAAT---ACCGAGTCC-TCGGCG---AACGGCG--CCGC-GACGATCGG----TGGTTGTC---------------AA-------------ACCTCGG-----…
296	>M01634_72_000000000-C3HGL_1_1102_12062_7179	M01634_72_000000000-C3HGL_1_1102_12062_7179	TGGTGCTGGTATG-----CGATA-------------------CTT---GGTGTGAATCG---GT--TT-GGGGGCG----GAAATTAGCC-TCCTGTGC---------CATGT-TGTGCGGCTGGCGTAAAA----CTGAGTCT-ATGGTG---ACGAATG--TCAC-GACAT-CGG----TGGTTGTA-------------AGAA------------GACCTTCT--------------------TGT-----------------CTTG-------TCGTGT---GA--ATGTCCGTCAT---CT----TATACGGCT------CAAT-GAC-------------CCTTAGGCG--------CCAA---------AAACTTTG-GCAC------T---…
488	>M01634_72_000000000-C3HGL_1_1102_14384_21289	M01634_72_000000000-C3HGL_1_1102_14384_21289	TGCAGAATCTCGTGAATCACCGAGTCTTTGAACGCA-AGTTGTG-------------TCCAAAGCC-TTTAGGATGAGGGCACGTCTGCCTGGGTGTC---ACGTAT--CCCGTCA-----CA-------------CC---------------------CC---A---ACCCGTCCCAACT-----C-----------------------GGACATGAT-----------GGATGGTGGGAGCA----GATATTGGCC-TCCCGTGTA--------CTCGC-ATTACAGTTGGTCTAAAA----TTGAGCCC-CGAGCG---ACGAACG--TTAC-GACAAGTGG----TGGTC------------TGTAATAG------------CTATTTCG-----…
216	>M01634_72_000000000-C3HGL_1_1102_14950_10765	M01634_72_000000000-C3HGL_1_1102_14950_10765	TGCAGAATCCCGTGAACCATCGAGTCTTTGAACGCA-AGTTGCG-------------CCCGAAGCC-ATTAGGCCGAGGGCACGTCTGCCTGGGTGTC---ACACGT----CGTTGCC----CCCCA---------CCTT-------------------CC----------CAAC-CCCCT-----C-----------------------GGG---AGT-----TG--------GA-TGGGACG----GATGATGGCC-TCTCGTATG----C---TCAGT-CACGCAGTTGGCATAAAT---ACTAAGTCC-TCGGCG---ACCAACG--CCAC-GACAATCGG----TGGTTG---------------TCAA------------A-CCTCGG-----…
205	>M01634_72_000000000-C3HGL_1_1102_15035_20681	M01634_72_000000000-C3HGL_1_1102_15035_20681	TGCAGAATCCCGTGAACCATCGAGTCTTTGAACGCA-AGTTGCG-------------CCCGACGCC-TTCGGGCTGAGGGCACGCCTGCCTGGGCGTC---ACGCAT--CGCGTCG-------TCC----------CC---------------------TC---C------CATT--CCCT-----C-----------------------ACG---GGT-----TTG---GT--TA-TGGGACG----GATAATGGCT-TCCCGTTAG----------------CTCGGTTAGCCCAAAA----AGGATCCC-TCATCG---ACGGATG--TCAC-AACCAGTGG----TGGTTG---------------AAAG----------------ATCA-----…
114	>M01634_72_000000000-C3HGL_1_1102_15251_14158	M01634_72_000000000-C3HGL_1_1102_15251_14158	TGCAGAATCTCGTGAACCATCGAGTCTTTGAACGCA-AGCTGCG-------------GCCCAAGCT-TTCTAGCCGAGGGCACGTCTGCCTGGGTGTC---ACAAAT----ATTCA--------T-----------CC---------------------CC---C------CATC--CTCT-----C-----------------------GAT---GAT----------------A-GGGGACG----GAAGCTGATC-TCCCGTGTG----T---TACCG-CACGCGGTTGGCAAAAAT----CCGAGTTA-AGGACG-CTAGGAGCG--TCTT-GACATGCGG----TGGTG------------------AA----------------TTCA-----…
268	>M01634_72_000000000-C3HGL_1_1102_15492_14327	M01634_72_000000000-C3HGL_1_1102_15492_14327	TGCAGAATCCCGTGAACGCA-AGTTGCG-------------CCCCAAGCC-TTCTGGCCGAGGGCACGTCTGCCTGGGTGTC---ACAAAT----CGTCG-------T------------CC---------------------CC---C------CATC--CTCT-----C-----------------------GAG---GAT----------------A-TCGGACG----GAAGCTGGTC-TCCCGTGTG----T---TACCG-CACGCGGTTGGCCAAAAT----CCTAGCTA-AGGATG-CCAGGAGCG--TCTT-GACATGCGG----TGGTG------------------AA----------------TTCA--------------------A…
23	>M01634_72_000000000-C3HGL_1_1102_15766_3990	M01634_72_000000000-C3HGL_1_1102_15766_3990	TGCAGAATCCCGTGAACCATCGAGTCTTTGAACGTA-AGTTGCG-------------CCCGAAGCC-GTTAGGCCGAGGGCACGTCTGCCTGGGCGTC---ACAAGT----CGTTG--------------------CC---------------------CC---C-----CCGACCCCTTT-----------------------------GGG---GGT--------------CAGACGGGACG----GATGATGGCCTTCCCGTGTG--------CCCCGTCACGCGGTTGGCATAAAT---ACCGAGTCC-TCGGCG---ACCGGCG--CCGC-GGCGATCGG----TGGTTG--------------------------------------------…
207	>M01634_72_000000000-C3HGL_1_1102_16027_6889	M01634_72_000000000-C3HGL_1_1102_16027_6889	TGCAGAATCCCGTGAACCATCGAGTCTTTGAACGCA-AGTTGCG-------------CCCGATGCC-TTCGGGCTGAGGGCACGCCTGCCTGGGCATC---ACGCAT--TGCGTCG---------------------C---------------------CC---C------ATACCAATTT-----------------------------------GGT----------------G-CGGGGCG----AATAATGGCA-CCCTGTTAG----------------CTCGGTTTGCCCAAAA----ATGATCCC-ACATCC---ACGGATG--TCAG-AACTAGTGG----TGGTTGAA---------------GG----------------ATCA-----…
461	>M01634_72_000000000-C3HGL_1_1102_16190_9419	M01634_72_000000000-C3HGL_1_1102_16190_9419	TG-------------CAGAATCCCGTGAATCACCAAGTCTTTGAACGCAAGTTGCGC--CCAAAG--CCTTTAG-----GAT------------GA---------------------GG---G---CACGTCTGCCTGG-----G-----------------------CGTCATGTA-----------TCCCATTGTACCCC----CAACCTGTCC-TAACTCGGG--------CATGA-TGGCTGGTTGGTCTAAAA----TCAAGCCC-CAAGCG---ATGAACG--TCAC-GACAAGTGG----TGGTC------------TGTAATAG------------CTATTTTG-----------------------------------TGTTGTGCG---…
265	>M01634_72_000000000-C3HGL_1_1102_16849_22802	M01634_72_000000000-C3HGL_1_1102_16849_22802	TGCAGAATCCCGTGAACCATCGAGTCTTTGAACGCA-AGTTGCG-------------CCCCAAGCC-TTCTGGCCGAGGGCACGTCTGCCTGGGTGTC---ACAAAT----CGTCG--------T-----------CC---------------------CC---C------CATC--CTCT-----C-----------------------GAG---GAT----------------A-TGGGACG----GAAGCTGATC-TCCCGTGTG----T---TACCG-CACGCGGTTGGCCAAAAT----CCGAGCTA-AGGACC-CCAGGAGCG--TTCT-TACATACGG----TGGTG------------------AA----------------TTCA-----…
406	>M01634_72_000000000-C3HGL_1_1102_17798_6180	M01634_72_000000000-C3HGL_1_1102_17798_6180	TGCAGAGTCCCGTGAACCATCGAGTCTTTGAACGCA-AGTTGCG-------------CCCGATGCC-ATTAGGTTGAGGGCACGTCTGCCTGGGTGTC---ACAAAT----CGTCG-------T------------CC---------------------CC---C------CATC--CTCT-----C-----------------------GAG---GAT----------------A-TGGGATG----GAAGCTGATC-TCCCGTGTG----T---TACCG-CACGCGGTTGGCCAAAAT----CCTAGCTA-AGGATG-CCAGGGGCG--TCTT-GACATGCGG----TGGTG------------------AA----------------TTCA-----…
531	>M01634_72_000000000-C3HGL_1_1102_18161_25503	M01634_72_000000000-C3HGL_1_1102_18161_25503	TGCAGAATCCCGTGAACCATTGAGTCTTTGAACGCA-AGTTGCG-------------CCCGAAGCC-ACTAGGCTAAGGGCACGTCTGCCTGGGTGTC---ACGCAT-CT-AGTTG--------------------CC---------------------CC---C---TGACCAAACTAAT-----CTTCT-------------------AAG---AGATTTTGTCG---GT--TT-GGGGGCG----GAAATTAGCC-TCCTGTGC---------CATGT-TGTGCGGCTGGCGTAAAA----CTGAGTCT-ATGGTG---ACGAATG--TCAC-GACAT-CGG----TGGTTGT-------------------------------A-----------…
355	>M01634_72_000000000-C3HGL_1_1102_18267_12636	M01634_72_000000000-C3HGL_1_1102_18267_12636	TGCAGAATCCCGTGAACCATCGAGTCTTTGAATGCA-AGTTGCG-------------CCCCAAGCC-TTCTGGCCGAGGGCACGTCTGCCTGGGTGTC---ACAAAT----CGTCA-------T-------------C---------------------CC---C------CATC--CTCT-----C-----------------------GAG---TAT----------------A-TCGGACG----GAAGCTGGTC-TCCTGTGTG----T---TACCA-CACGTGGTTGGCAAAAAT----CCGAGCTA-GGGATG-CCAGGAGCG--TCTT-GACATGCGG----TGGTG------------------AA----------------TTCA-----…
690	>M01634_72_000000000-C3HGL_1_1102_18724_5136	M01634_72_000000000-C3HGL_1_1102_18724_5136	TGCAGAATCCCGTGAACCATCGAGTTTTTGAACGCA-AGTTGCG-------------CCCAAAGCC-ATTAGGCCGAGGGCACGTCTGCCTGGGCGTC---ACGCAT--TGCGTCG--------------------CC---------------------CC---CACACCCCGTGTCCCCAAAAGGG-----------------------GCACCGGGC----------------GAGGGGGCG----GATATTGGCC-TCCCGTGC---------TCCCG-GGTGCGGTTGGCCCAAAA----GCGAGTCC-CCGGCA---GCGGACG--TCAC-GACAAGTGG----TGGTTGA----------------AA------------AGCCTTCT-----…
712	>M01634_72_000000000-C3HGL_1_1102_19672_6944	M01634_72_000000000-C3HGL_1_1102_19672_6944	TGCAGAATCCCGTGAACCATCGAG-TCTTTGA-------------ACGCAAG---TTGCGCCCCAAGCCTTCT-GGCCTGGGTGTC---ACAAAT----CGTCG--------------------TT---------------------CC---C------CCTCATCCTT-----C-----------------------AAG---GAT----------------T-CGGGACG----GAAGCTGATC-TCCCGTGTG----T---TACCG-CACGCGGTTGATCGAAAT----CCGAGCCA-AGGATG-CCTTGAGCG--TCCC-GACATGCGG----TGGTG------------------AA------------CTCGTTCA-----------------…
203	>M01634_72_000000000-C3HGL_1_1102_19893_16741	M01634_72_000000000-C3HGL_1_1102_19893_16741	TGCAGAATCCCGTGAACCATCGAGTCTTTGAACGCA-AGTTGCG-------------CCTGATGCC-ATTAGGTTGAGGGCACGTCTGCCTGGGCGTC---ACATAT----CGAAG--------------------CC---------------------TC---T---TGCCAATTTCCTA-----TTGAT-------------------TGG---TAT-------------TGTG-CAAGATG-----ATGTTGGCC-TCCCGTGAG--CAC---CATCGCCTCATGGTTGGTTGAAAA----TCGAGACC-TTGGTA---GGGTGTG--CCAT-GATAGGTGG----TGGCTGTG-TTACGCACGAGACCAA------------GTAAGTCA-----…
271	>M01634_72_000000000-C3HGL_1_1102_20050_4650	M01634_72_000000000-C3HGL_1_1102_20050_4650	TGCAGAATCCCGTGAACGATCGAGTCTTTGAACGCA-AGTTGCA-------------CCCCAAGCC-TTCTGGCCGAGGGCATGTATGCCTGGGTGTC---ACAAAT----CGTTG--------TC----------CC---------------------CC---C------CATC--CTCT-----C-----------------------GAG---GAT----------------A-TGGGATG----GAAGCTGATC-TCCCATGTG----T---TAACG-CATGCGGTTGGCCAAAAT----CCGAACCA-AAGACG-CCTGGAGCA--TCTT-GACATGCGG----TGGTG------------------AA----------------TTCA-----…
213	>M01634_72_000000000-C3HGL_1_1102_20182_5161	M01634_72_000000000-C3HGL_1_1102_20182_5161	TGCAGAATCCCGTGAACCATCGAGTCTTTGAACGCA-AGTTGCG-------------CCCGAAGCC-ATTAGGCCGAGGGCACGTCTGCCTGGGCGTC---ACACGT----CGTTG--------CC----------CC---------------------CC----------CAAC-CCCCT-----C-----------------------GGG---AGT-----TG--------GA-TGGGACG----GATGATGGCC-TCCCGTGTG----C---TCAGT-CACGCGGTTGGCATAAAT---ACCGAGTCC-TCGGCG---ACCGGCG--TCGC-GGCGATCGG----TGGTTG---------------TCAA------------A-CCTCGG-----…
477	>M01634_72_000000000-C3HGL_1_1102_20183_10211	M01634_72_000000000-C3HGL_1_1102_20183_10211	TGCAGAATCCCATGAATCATCAAGTCTTTGGACGCA-AGTTGCG-------------CCCAAAGCC-TTTAGGCTGAGGGCACGTCTTCTTGGGTTTC---ACGTAT--CCCATTG-----CAC------------CC---------------------CC---A---ACCTGTCCCAACT-----C-----------------------GGGCATGAT-----------GGCTGGTGGGAGCA----GATATTGGCC-TCCTGTGTA--------CTCGC-ATTATGGTTGGTCTAAAA----TCGAGCCC-CAAGTA---ACGAACG--TCAC-GACAAGTGG----TGGTC------------TATAATAG------------CTATTTCG-----…
651	>M01634_72_000000000-C3HGL_1_1102_20568_6654	M01634_72_000000000-C3HGL_1_1102_20568_6654	CGAGATCTACACATCGTACGCCTGGTGCTGGTATGCGATACTTGGTGTGAATTGCAGAATCCCGTGAACCATCGAGTCTTTGAACGCA-AGTTGCG-------------CCCCAAGCC-TTCTGGCCGAGGGCACGTCTGCCTGGGTGTC---ACAAAC----CGTCG--------------------TC---------------------CC---T------CTCATCCTTC-----------------------------TCG---GAT----------------A-TGGGACG----GAAATTGGTC-TCCCGTGTG----T---TACCG-CACGCGGTTGGCCAAAAT-----------------------------------------------…
479	>M01634_72_000000000-C3HGL_1_1102_21053_6628	M01634_72_000000000-C3HGL_1_1102_21053_6628	TGCAGAATCTCGTGAATCACTGAGTCTTTGAACGCA-AGTTGCG-------------CCCAAAGCC-TTTAGGCTGAGGGCACGTCTGCCTGGGCGTA---ACGTAT--CCCATCG-----CAC------------CC---------------------CC---A---ACCCATTCCAACT-----C-----------------------GGGCATGAT-----------GTCTGGTGGGAGCG----TATATTAGCC-TCCTATGTA--------CTCGC-ATTACGGTTGGTCTAAAA----TCGAGCCC-CGAGCG---ACAAATG--TCAT-GATAAGTTG----TGGTC------------TGTAATAG------------CTATTTCG-----…
447	>M01634_72_000000000-C3HGL_1_1102_22219_24680	M01634_72_000000000-C3HGL_1_1102_22219_24680	TGCAGAATCCCGTGAACCATCGAGTCTTTGAACGCA-AGTTACG-------------CCCGAGGCC-TCCTGGTCAAGGGCACGTCTGCTTGGGTGTC---ACGCAT----CGTCG--------------------CC---------------------CC---C------GCTCCCCCCGGCTCAT-----------------------GAG---GGC------------------GGGGGTG----GATACTGGTCTTCGCGTGC---------TCCCG-CCCGTGGTTGGCCTAAAA----TCGAGTCC-CCGGCG---ATGGTCG--CCAC-GACAAGCGA----TGGTTGA----------------GA------------GACCCTCG-----…
608	>M01634_72_000000000-C3HGL_1_1102_22775_23774	M01634_72_000000000-C3HGL_1_1102_22775_23774	TGCAGAATCCCGTGAACCATCGAGTCTTTGAACGCA-AGTTGCG-------------CCCGATGCC-ATTAGGTTGAGGGCACGTCTGCCTGGGCGTC---ACATAT----CGAAG--------------------CC---------------------TC---T---CGCCAATTTCCTA--------------------TATTGATAGGGGTATTGT----------------G-CAGGGTG----AATGTTGGCC-TCCCGTGAG--CTC---TATTGCCTCATGGTTGGTTGAAAA----TCGAGACC-TTGGTA---GGGTGTG--CCAT-GATAGGTGG----TGGCTGTGTTA------------------------------CGCA-----…
60	>M01634_72_000000000-C3HGL_1_1102_23371_11858	M01634_72_000000000-C3HGL_1_1102_23371_11858	TGCAGAATTCCGTGAACCATCGAGTCTTTGAACGCA-AGTTGCG-------------CCCCAAGCCTTTCTGGTAGAGGGCACGTCTGCCTGGGTGTC---ACAAAT----CATCG--------T-----------CC---------------------CC---C------CATC--CTCT-----C-----------------------GAG---CAT----------------A-TGGGACG----GAAGCTGATC-TCATGTGTG----T---TACCG-CACGCGGTTGGCCAAAAT----CCGTGCTA-AGGACG-CAAGGAGCG--TCTT-AACATGCGG----TGGTG------------------AA----------------TTCA-----…
187	>M01634_72_000000000-C3HGL_1_1102_25609_18446	M01634_72_000000000-C3HGL_1_1102_25609_18446	TGCAGAATCCCGTGAACCATCGAGTCTTTGAACGCA-AGTTGCG-------------CCCGAAGCC-GTTAGGCCGAGGGCACGTCTGCCTGGGCGTC---ACATAT----CGAAG--------------------CC---------------------TC---C---TGCCAATTTCC-C-----T------------------------TT---GAT----------TATTGTG-CAGGGCG----AATGTTGGCC-TCCCGTGAG--CTT---TATTGCCTCATGGTTGGTTGAAAA----TCGAGACC-TTGGTA---GGGTGTG--CCAT-GATAGGTGG----TGGCTGTG-TTACGCACGAGACCTA------------GTAAGTCA-----…
59	>M01634_72_000000000-C3HGL_1_1102_26063_21341	M01634_72_000000000-C3HGL_1_1102_26063_21341	TGCAGAATCCCGTGAACCATCGAGTCTTTGAACGCA-AGATGCA-------------CCCCAAGCC-ATCTGGCCGAGGGCACGTCTGCCTGGGTGTC---ACAAAT----CGTCA--------T-----------CC---------------------CC---C------CATT--CTCT-----C-----------------------GAG---GAT----------------A-TGGGACG----GAAGCTGATC-TCCTGTGTG----T---TACCG-CACGAGGTTGGCCAAAAT----CCGAGCTA-AGGACG-CCAGGAGCG--TCTT-GACATGTGG----TGGTG------------------AA----------------TTCA-----…
117	>M01634_72_000000000-C3HGL_1_1102_26632_14899	M01634_72_000000000-C3HGL_1_1102_26632_14899	TGCAGAATCCCGTGAACCATCGAGTCTTTGAACGCA-AGTTGCG-------------CCCCAACCC-TTCTGGCCGAGGGCACATCTGCTTGGGTGTC---ACAAAT----CTTCG--------T-----------CC---------------------CC---C------CATC--CTCT-----C-----------------------GAG---GAT----------------A-GGGGACG----GAAGCTGATC-TCCCGTGTG----T---TACCG-CACGCGGTTGGCCAAAAT----CCAAGCTT-AGGACG-CCAGGAGCG--TCTT-GACATGCGG----TGGTG------------------AA----------------TTCA-----…
303	>M01634_72_000000000-C3HGL_1_1102_27398_13039	M01634_72_000000000-C3HGL_1_1102_27398_13039	TGCAGAATCCCGTGAACCATCGAGTCATTGAACGCA-AGTTGCG-------------CGCCAAGCC-TTCTGGCCGAGGACACGTCTTCCTGGGTGTC---ACAAAT----CATC--------------------------------------------CC---C------CGTC--CTCT-----C-----------------------GAG---GAT----------------A-TGGGACG----GAAGCTGATC-TCCCATGTG----T---TACCG-CATGCGGTTGGCCAAAAT----CCGAGCTA-AGGACG-CCATGAGCG--TCTT-GACATGCGG----TGGTG------------------AA----------------TTCA-----…
611	>M01634_72_000000000-C3HGL_1_1102_28309_12779	M01634_72_000000000-C3HGL_1_1102_28309_12779	CGTAGAATCCCGTGAACCATCGAGTCTTTTAACGCA-AGTTGCG-------------CCCGAAGCC-ATCCGGCCAAGGGCACGCCTGCCTGGGCGTC---ACACGC----CGTTG-------CCC----------CC---------------------CC---G------CACA-TCCCT-----A-----------------------GGG---AGC-----GTC-G-----G---GGGGCG----GACGATGGCC-TCCCGTGCG----T---CACCC-CGCGCGGTTGGCACAAAT---GCCGGGTCC-TCGACG---ACGAACG--CCAC-GACAATCGG----TGGTCA---------------TCGA------------A-CCTCGG-----…
781	>M01634_72_000000000-C3HGL_1_1102_4086_12514	M01634_72_000000000-C3HGL_1_1102_4086_12514	TGCAGAATCCCGTGAACCATCGAGTTTTTGAACGCA-AGTTGCG-------------CCCGAAGCC-GTTAGGCCGAGGGCACGCCTGCCTGGGTGTC---ACACAT----CGTTG--------------------CC---------------------CC---A---------ATGCCAA-----TCGCCTCACTTTGT------AGGTATT---TGC----------------T-TGGGGTG----AATGTTGGCC-TCCCGTGAG----C---TTTGT-CTCACGGTTGGTTGAAAA----TCGAGTGC-ATGGTG---TCGGGTGTACCAT-GATGGATGG--TGGTTGAGTGATGATGCTCGAGACCGA-----------------TCG-----…
5	>M01634_72_000000000-C3HGL_1_1102_4321_11316	M01634_72_000000000-C3HGL_1_1102_4321_11316	TGCAGAATCCCGTGAACCATCGAGTCTTTGAACGCA-AGTTGCG-------------CCCCAAGCC-TTCTGGCCGAGGGCACGTCTGCCTGGGTGTC---ACAAAT----CGTCG--------------------TT---------------------CC---C------CCTCATCCTT-----C-----------------------AAG---GAT----------------T-CGGGACG----GAAGCTGATC-TCCCGTGTG----T---TACCG-CACGCGGTTGATCGAAAT----CCGAGCCA-AGGATG-CCTTGAGCG--TCCC-GACATGCGG----TGGTG------------------AA------------CTCGTTCA-----…
97	>M01634_72_000000000-C3HGL_1_1102_4873_13243	M01634_72_000000000-C3HGL_1_1102_4873_13243	TGCAGAATCCCGTGAACAATCGAGTCTTTGAATGCA-AGTTGCG-------------CCCCAAGCG-TTCTGGCCGAGGGCACGTCTGCCTGGGTGTC---ACAAAT----CGTCG--------T-----------CC---------------------CC---C------CATC--CTCT-----C-----------------------GAG---GAT----------------A-TGGGACG----GAAGCTGATC-TCCCGTGTG----T---TACCG-GACGCGGTTGGCCAAAAT----CCGAGCTA-AGGACG-CCAGGAGCG--TCTT-GACATGCGG----TGGTG------------------AA----------------TTCA-----…
39	>M01634_72_000000000-C3HGL_1_1102_5256_19627	M01634_72_000000000-C3HGL_1_1102_5256_19627	TGCAGAATCCCGTGAACCATCGAGTCTTTGAACGCA-AGTTGCG-------------CCCGACGCC-TTCGGGCTGAGGGCACGCCTGCCTGGGCGTC---ACGCAT--CGCGTCG--------------------CC---------------------CC---C------ATACCAATTT-----------------------------------GGT----------------G-CGGGGCG----GATAATGGCA-TCCCGTTAG----------------CTCGGTTTGCCCAAAA----ATGATCCC-TCATCG---ACGGATG--TCAC-AACCAGTGG----TGGTTGAA---------------AG----------------ATCA-----…
165	>M01634_72_000000000-C3HGL_1_1102_5987_18405	M01634_72_000000000-C3HGL_1_1102_5987_18405	TGCAGAATCCCGTGAACCATCGAGTCTTTGAACGCA-AGTTGCG-------------CCCCAAGCC-TTCTGGCTGAGGGCACGTCTGCCTGGGTTTT---ACAAAT----CGTCG--------C-----------CC---------------------CC---C------CATC--CTCT-----C-----------------------GAG---GAT----------------A-TGGGACG----GAAGCTGATC-TCCCGTGTG----T---TACCG-CACGCGGTTGGCCAAAAT----CCAAGCTA-AGGACA-TCAGAAGCG--TCTT-GACATGCGG----TGGTG------------------AA----------------TTTA-----…
478	>M01634_72_000000000-C3HGL_1_1102_6382_12786	M01634_72_000000000-C3HGL_1_1102_6382_12786	CGAGATCTACACACTATCTGCCTGGTGCTGGTATGCGATACTTGGTGTGAATTATAGAATTCCGTGAATCACCTAGTCTTTGAACGCA-AGTTGCG-------------CCACAAG---TGATGGTCTGTAATAGCTATTTCATGTTGTG---CGTTAT----C-TCG--------------------TC---------------------GC-------C-CGT-GTGATCT-----------------------------------CAC----------------C-AAGACCC----TAGAGCATTA-TCAC--G-A----T---T------ATGC-TTTTATCGTGAC-----------------------------------------------…
798	>M01634_72_000000000-C3HGL_1_1102_6560_11182	M01634_72_000000000-C3HGL_1_1102_6560_11182	T---TCTACACACT-AT-----CTGCC-------------------TGG---TGCTGGTATGCG--ATA-CT-TGGTGTG----AATTGCAGAA-TCCCGTGA---------ACCAT-TGAGTCTTTGAACGCAAG----TTGCGCCC-GAAGCC---ACTAGGC--TAAG-GGCAC-GTC----TGCCTGGG-------------TG-T------------CA-CGCAT--------------------TGT-----------------CTTG-------TCGTGT---GA--ATGTCCGTCAT---CT----TATACGGCT------CAAT-GAC-------------CCTTAGGCG--------CCAA---------AAACTTTG-GCAC------…
719	>M01634_72_000000000-C3HGL_1_1102_6725_25348	M01634_72_000000000-C3HGL_1_1102_6725_25348	TGCAGAATCCCGTGAACCATCGAGTCTTTGAACGCA-AGTTGCG-------------CCCCAAGCC-TTCTGGCCGAGGGCTCGTCTGCCTGGGTGTC---ACAAAT----CGTCG---------------------T---------------------CC---C---C-CCATCCTCTCG-----------------------------A-G---GA-----------T----A-TGGGA-CG----GAAGCTGATC-TCCCGTGTG--CCT---TCTGG-CCCGCGGCTGGCCTAAAT----GAGATCCT-GCATCG---ACGGATG--TCAC-GACCAGTGG----TGGTTGAA---------------AA----------------CTCA-----…
20	>M01634_72_000000000-C3HGL_1_1102_7988_14944	M01634_72_000000000-C3HGL_1_1102_7988_14944	TGCAGAATCCCATGAACCATCGAGTCTTTGAACGCA-AGTTGCG-------------CCCGAAGCC-ATTAGGCCGAGGGCACGTCTGCCTAGGCGTC---ACACGT----CGTTG--------------------CC---------------------CC---C---C--C-AC-CCCTT-----C-----------------------AGG---GTC-----------TG--GG-CGGGACG----GATGATGGCCTTCCCGTGTG--------CCCCGTCACGCGATTGGCATAAAT---ACCGAGTCC-TCGGCG---ACCGGCG--CCGC-GACAATCGG----TGGTTGT----------------CA------------AACCTCGG-----…
688	>M01634_72_000000000-C3HGL_1_1102_9528_16106	M01634_72_000000000-C3HGL_1_1102_9528_16106	TGCAGGATCCCGTGAACCATCGAGTCTTTGAACTCA-AGTTGCG-------------CCCGAAGTC-GTTAGGCCGAGGGCACGTCTGCTGGG-----------------------------------------------------------------------C------------------------------------------------------------------------GGGGGCG----GACAATGGGC-CCTCGTGAG----C---CGTAGGCTCGTGGCCGGCCCAAAA---AATGATTCA-CCGGCG--ACCTGACG--TCAC-GACAAGTGG----TGGTAGAG---------------AA-------------------------…
626	>M01634_72_000000000-C3HGL_1_1103_10138_7495	M01634_72_000000000-C3HGL_1_1103_10138_7495	TGCAGAATCCCGTGAACCATCGAGTTTTTGAACGCA-AGTTGCG-------------CCCGAAGCC-ATTAGGCTGAGGGCACGTCTGCCTGGGCGTC---ACACAT-TGCCGTCG--------------------CC---------------------CCCTTC------CAATTTCCCA---------------------TTCTTGGGGATGTTGGT----------------AGTCGGGCG----GATATTGGTC-TCCCGTGC---------TCTCG-AGCGCGGTTGGCCCAAAA----GCGAGTCC-CCGACA---ACGGACG--TCAT-GACAAGTGG----TGGTTGA----------------AA------------AGCCTTCT-----…
691	>M01634_72_000000000-C3HGL_1_1103_10151_4379	M01634_72_000000000-C3HGL_1_1103_10151_4379	CGCCCGAAGCCATTAGGCCTAGGGCACGTCTGCCTTGGCATCTCA------------CATCGCGTCGCCCCCCACACACCCTCGGGTGCTGGG-----------------------------------------------------------------------C------------------------------------------------------------------------GGGGGCG----GACAATGGCC-CCTCGTGAG----C---CGTAGGCTCGCGGCCGGCCCAAAA---AAAGAGTCG-CCAGCG--ACCTGACG--TCAC-GACAAGTGG----TGGTAGAG---------------AA-------------------------…
445	>M01634_72_000000000-C3HGL_1_1103_10770_10257	M01634_72_000000000-C3HGL_1_1103_10770_10257	TGCAGAATCCCGTGAACCATCGAGTCTTTGAACGCA-AGTTGCG-------------CCCGAAGCC-ATCAGGCCGAGGGCACGCCTGCCTGGGCGTC---ACACGC----CGTTGCC------C-----------CC---------------------CC---C-----CGCGCATCCCT-----C-----------------------GGG---AGC-----------GTCGGG-AGGGGCG----GACGATGGCC-TCCCGTGCG----T---CACCC-CGCGCGGTTGGCACAAAT---GCCGGGTCC-TCGGCG---ACGAACG--CCAC-GACAATCGG----TGGTCG--------TCGAACCTCGG-----------------TTG-----…
142	>M01634_72_000000000-C3HGL_1_1103_10893_17957	M01634_72_000000000-C3HGL_1_1103_10893_17957	TGCAGAATCCCGTGAACCATCGAGTCTTTGAACGCA-AGTTGTG-------------CCCCAAGCC-TTCTGGCCGAGGGCATGTCTGCCTGGGTGTC---ACAAAT----CGTCG--------T-----------CC---------------------CC---C------TATC--CTCT-----C-----------------------GAG---GAT----------------A-TGGGACG----GAAGCTGATC-TCCCGTGTG----T---TACCG-CACGCGGTTGGCCAAAAT----CCAAGCTA-AGGACG-CTAGGAGCA--TCCT-GACATGCGG----TGGTG------------------AA----------------TTCA-----…
45	>M01634_72_000000000-C3HGL_1_1103_11211_8166	M01634_72_000000000-C3HGL_1_1103_11211_8166	TGCAGAATCCCGTGAACCATCGAGTCTTTGAACGCA-AGTTGCG-------------CCCGAAGCC-ATTAGGTTGAGGGCACGTCTGCCTGGGCGTC---ACATAT----CGTTG--------------------CC---------------------CG-------------ATGCCAA-----TTTCC--TCTTGATAAGGAGGTATG-C---TGT----------------G-CAGGGTG----AATGATGGCT-TCCCGTGAG----CACTGCTGC-CTCATGGTTGGTTGAAAA----TTGAGTCC-TTGGTA---GCGTGTG--CCAT-GATAGATGG----TGGTTGAG-TGATGCACGAGACCAT------------A----TCA-----…
693	>M01634_72_000000000-C3HGL_1_1103_11673_24893	M01634_72_000000000-C3HGL_1_1103_11673_24893	TGCAGAATCCCGTGAACCATCGAGTCTTTGAACGCA-AGTTACG-------------CCCGAAGCC-GTTAGGCCGAGGGTGCGTCTGCCTCACCGTC---TTGCAT--CTCGTCA--------------------CCT--------------------CC---C------CACACAGCCT-----C-----------------------GGG---TGC----------------T-GGGGGGG----GATAATGGTC-CCCCATGCA----C---TACAGGTTTATGGTCGGCCCAAAA---AATGAGTCG-TCGGCA--AC-TGACG--TCAC-GACAAGTGG----TGGT----AGAG-----------AA----------------ATCA-----…
656	>M01634_72_000000000-C3HGL_1_1103_11706_9102	M01634_72_000000000-C3HGL_1_1103_11706_9102	TGAACCATCAAGTCTTTCAACGCAAGTTGTGCCCCAAGCCTTCT-------------CCCCAAGCC-TTCTGGCCGAGGGCATGTCTGCCTGGGTGTC---ACAAAT----CGTCG-------T------------CC---------------------CC---C------CATC--CTCT-----C-----------------------GAG---GAT----------------A-TGGGACG----GAAGCTGATC-TCCCGTGTG----T---TACCG-CACGCGGTTGGCCAAAAT----CCGGGCTA-AGAACG-TCAGGAGCG--TCTT-GACATGCGG----TGGTG------------------AA----------------TTCA-----…
474	>M01634_72_000000000-C3HGL_1_1103_13130_19104	M01634_72_000000000-C3HGL_1_1103_13130_19104	TGCAGAATCCCGTGAATCACCGAGTCTTTGAACGCA-AGTTGCG-------------CCCAAAGCC-TTTAGGCTGAGGGCACGTCTGCCTGGGCGTC---ACGTAT--CCCGTCG-----CAC------------CC---------------------AC---A---ATCCGTCCCAACT-----C-----------------------GGGAATGAT-----------GGCTGGTGGGAGCG----GATATTGGCC-TCCCATGTA--------CTCGC-GTTACGGTTGGTCTAAAA----TCGAGCCC-CGAGCG---ACGAACG--TCAC-GACAAGTGG----TGGTC------------TGTAATAG------------CTATTTCG-----…
283	>M01634_72_000000000-C3HGL_1_1103_13150_23007	M01634_72_000000000-C3HGL_1_1103_13150_23007	TGCAGAATCCCGTGAACCATCGAGTTTTTGAACGCA-AGTTGCG-------------CCCGAAGCC-ATTCGGTTGAGGGCACGTCTGCCTGGGCGTC---ACGCAT-CG-CGTCG--------------------CC---------------------CC---C---ATCATGCCATCCT-----------------------------TGT---GAT----------GCTTTGATGGGGGCG----GATACTGGTC-TCCCGT-------T---CATCACTGAGCGGTTGGCCAAAAT----AAGAGTCC-CATTTG---ACGGGCA---CAC-GACTTGTGG----TGGTTGAC---------------AA------------AACCGGAA-----…
136	>M01634_72_000000000-C3HGL_1_1103_13247_2518	M01634_72_000000000-C3HGL_1_1103_13247_2518	TGCAGAATCCCGTGAACCATCGAGTCTTTGAACGCA-AGTTGCG-------------CCCGAGGCC-TCCTGGTCGAGGGCACGTCTGCCTGGGTGTC---ACAAAT----CGTCG--------T-----------CC---------------------CC---C------CATC--CTCT-----C-----------------------GAG---GAT----------------A-TGGGATG----GAAGCTGGTC-TCCCGTGTG----T---TACCG-CACGCGGTTGGCCAAAAT----CCGAGCTA-TGGACG-TCAGGAGCG--TCTT-GACATGCGG----TGGTG------------------AA----------------TTCA-----…
122	>M01634_72_000000000-C3HGL_1_1103_13355_14162	M01634_72_000000000-C3HGL_1_1103_13355_14162	TACAGAATCCCGTGAACCATCGAGTCTTTGAACGCA-AGTTGCG-------------CCCCAAGCT-TTCTGGCTGAGGGCACGTCTGCCTGGGTGTC---ACAAAT----ATTTG-------T------------CC---------------------CC---C------CATA--CTCT-----C-----------------------GAG---GAT----------------A-GGGGACG----GAAGCTGATC-TCCCGTGTG----T---TTCCG-CACGCGGTTGGCCAAAAT----CTGAGGTA-AGGACG-CCAGGAGCG--TCTT-GACATGCGG----TGGTG------------------AA----------------TTCA-----…
185	>M01634_72_000000000-C3HGL_1_1103_13633_17942	M01634_72_000000000-C3HGL_1_1103_13633_17942	TGCAGAATCCCGTGAACCATCGAGTCTTTGAACGCA-AGTTGCG-------------CCCGAAGCC-ATCAGGCCGAGGGCACGCCTGCCTGGGCGTC---ACACGC----CGTTG--------------------CC---------------------CC---C---CCGCACATCCCTC-----------------------------GGGAGCGTC----------------G-GGGGGCG----GACGATGGCC-TCCCGTGCG----T---CACCA-CGCGCGGTTGGCATAAAT---GTCGGGTCC-TCGGCG---ACGAACG--CCAC-GACAATCGG----TGGTCGTCG--------------AA---------------CCTCG-----…
649	>M01634_72_000000000-C3HGL_1_1103_17478_23149	M01634_72_000000000-C3HGL_1_1103_17478_23149	TGCATAATCCCGTGAACCATCGAGTCTTTGAACGCA-AGTTGCG-------------CCCCAAGCC-TTCTGGCCGAGGGCACGTCTGCCTGGGTGTC---ACGAAT----CGTCG-------------------TCC---------------------CC---C------CATC--CTCT-----C-----------------------GAG---GAT----------------A-TGGGATA----GAAGCTGATC-TCCCGTGTG----T---TACCG-CACGCGGTTGGCCAAAAT----CCGAGCTA-AGGACG-CCAGGAGCG--TCTT-GACATGCGG----TGGTG------------------AA----------------TTTA-----…
475	>M01634_72_000000000-C3HGL_1_1103_17605_22798	M01634_72_000000000-C3HGL_1_1103_17605_22798	TATAGAATCCCGTGAATCACCGAGTCTTTAAACGCA-AGTTGTG-------------CCCAAAGCC-TTTAGGCTGAGGGCATGTATGTCTGGGTGTC---ACGTAT--CCTGTCG-----CAC------------CC---------------------CT---A---ACCCGTCCCAACT-----C-----------------------GAGCATGAT-----------GGCTGGTGGGAGCA----TATATTGGCC-TCCTATGTA--------CTCGC-ATTATGGTTGGTCTAAAA----TCGAGCCC-CGAGTA---ACGAACG--TCAC-GATAAGTAG----TTATC------------TGTAATAG------------TTATTTCA-----…
281	>M01634_72_000000000-C3HGL_1_1103_17821_17627	M01634_72_000000000-C3HGL_1_1103_17821_17627	TGCAGAATCCCGTGAACCATCGAGTCTTTGAACGCA-AGTTGCG-------------CCCCAAGCC-TTCTGGCCGAGGGCACGTCTGCCTGGGTGTC---ACAAAT----CGTCG--------T-----------CC---------------------CC---C------CATC--CTCT-----C-----------------------GAG---GAT----------------A-TGGGACG----GAAGCTGATC-TCCCGTGTG----T---TACCG-CACGCGGTTGGCCAAAAT----TTGAGCTA-AGGACG-CCAGGAGCG--TCTT-GACATGCGG----TGGTG------------------AA----------------TTCA-----…
124	>M01634_72_000000000-C3HGL_1_1103_18159_13114	M01634_72_000000000-C3HGL_1_1103_18159_13114	TGCAGATTCCCGTGAACCATCGAGTCTTTGAACGCA-TGTTGCG-------------CCCCAAGCC--TCTGGCCGAGGGCACGTCTGCCTGGGTGTC---ACAAAT----CGTCA--------T-----------CC---------------------CC---C------CATC--CTCA-----C-----------------------GAG---GAT----------------A-TGGGACG----GAAGCTGATC-TCCCGTGTG----T---TACCG-CACACGGTTGGTCAAAAT----CCGAGCTA-TGGACG-CCAGGAGCG--TTTT-GACATGTGG----TGGGG------------------AA----------------TTCA-----…
232	>M01634_72_000000000-C3HGL_1_1103_19061_19108	M01634_72_000000000-C3HGL_1_1103_19061_19108	TGCATAATCCCGTGAACCATCGAGTCTTTGAACGCA-AGTTGCG-------------CCCCAAGCC-TTCTGGCCGAGGGGACGTATGCCCGGGTGTC---ACAAAT----CGTCG--------T-----------CC---------------------CC---C------CATC--CTCT-----C-----------------------GAG---GAT----------------A-TGGGACG----GAAGCTGATC-TCCTGTGTG----T---TACCG-CACGCGGTTGGCCAAAAT----CCTAGCTA-AGGACG-CCAGGAGCG--TCTT-GACATGCGG----TGGTG------------------AA----------------TTCA-----…
657	>M01634_72_000000000-C3HGL_1_1103_19311_10535	M01634_72_000000000-C3HGL_1_1103_19311_10535	TGCAGAATCCCGTCAACCATCGAGTCTTTGAACGCA-AGTTGCA-------------CCCCAAGCC-TTCTGGCCGTGGGCACGTCTGCCTGGGTGTC---ACAAAT----CGTCG-------T------------CC---------------------CC---C------CATC--CTCT-----C-----------------------GAG---GAT----------------A-TGGGACG----GAAGCTGATC-TCCCGTGTG----T---TACCG-CACGTGGTTGGCCAAAAT----CCGAGCTA-AGAACG-TCAGGAGCG--TCTT-GACATGCGG----TGGTG------------------AA----------------TTCA-----…
497	>M01634_72_000000000-C3HGL_1_1103_20112_21609	M01634_72_000000000-C3HGL_1_1103_20112_21609	TGCAGAATCCCGTGAACCATCGAGTCTTTGAACGCA-AGTTGCG-------------CCCGAAGCC-ATTAGGCCGAGGGCACGCCTGCCTGGGCGTC---ACACGT----CGTTG------CCAC----------CC---------------------CA----------CTAC-TCCCT-----C-----------------------GGG---A-T-----CG--------CG-GGGGGCG----GATGATGGCC-TCCCGTACG----C---TCCGT-CGCGCGGTTGGCATAAAT---ACCAAGTCC-TCGGCG---ACGCACG--CCAC-GACAATCGG----TGGTTG---------------CGAA------------A-CCTCGG-----…
11	>M01634_72_000000000-C3HGL_1_1103_20503_6617	M01634_72_000000000-C3HGL_1_1103_20503_6617	TGCAGAATCCCGTGAACCATCGAGTCTTTGAACGCA-AGTTGCG-------------CCCCAAGCC-TTCTGGCCGAGGGCACGTCTGCCTGGGTGTC---ACAAAT----CGTCG--------------------TC---------------------CC---C------CCCATCCTCT-----C-----------------------GAG---GAT----------------A-TGGGACG----GAAGCTGGTC-TCCCGTGTG----T---TACCG-CACGCGGTTGGCCAAAAT----CCGAGCTA-AGGGCG-CCAGGAGCG--TCTC-GACATGCGG----TGGTG------------------AA----------------TTCA-----…
13	>M01634_72_000000000-C3HGL_1_1103_21404_23200	M01634_72_000000000-C3HGL_1_1103_21404_23200	TGCAGAATCCCGTGAACCATCGAGTCTTTGAACGCA-AGTTGCG-------------CCCCAAGCC-TTCTGGCCGAGGGCACGTCTGCCTGGGTGTC---ACAAAT----CGTCG-------------------TCC---------------------CC---C------CATC--CTCT-----C-----------------------GAG---GAT----------------A-TGGGACG----GAAGCTGATC-TCCCGTGTG----T---TACCG-CACGCGGTTGGCCAAAAT----CCGAGCTA-AGAACG-TCAGGAGCG--TCTT-GACATGCGG----TGGTG------------------AA----------------TTTA-----…
217	>M01634_72_000000000-C3HGL_1_1103_22078_24480	M01634_72_000000000-C3HGL_1_1103_22078_24480	TGCAGAATCCTGTGAACCATCGAGTCGTTGAACGCA-AGTTACG-------------CCCGAAGCC-ACTAGGCTGAGGGCACGTCTGCCTGGGCGTC---ACACGT----CGTTG-------CCC----------CC---------------------CC----------CAAC-CCCCT-----C-----------------------GGG---AGT-----TG--------GA-TGGGGCG----GATGATGGCC-TCCCGTGTG----C---TCAGT-CACGCGGTTGGTATAAAG---ACCAAGTCC-TCAGCG---ACCAACG--CCAC-GACAATCGG----TGGTTG---------------TCAA------------A-CCTCGG-----…
711	>M01634_72_000000000-C3HGL_1_1103_23131_13923	M01634_72_000000000-C3HGL_1_1103_23131_13923	TGCAGAATCCCGTGAACCATCGAGT----------------------------------------------------------------CTGGGTGTC---ACAAAT----CGTCG--------------------TC---------------------CC---C---CCTCATC--CT-T-----C-----------------------AAG---GAT----------------T-CGGGACG----GAAGCTGGTC-TCCCGTGTG----T---TACCG-CAAGCGGTTGATCGAAAT----CCGAGCCA-AGGATG-CCTTGAGCG--TCCC-GACATGCGG----TGGTG------------------AA------------CTCGTTCA-----…
619	>M01634_72_000000000-C3HGL_1_1103_23139_8297	M01634_72_000000000-C3HGL_1_1103_23139_8297	TGCAGAATCCCGTGAACCATCGAGTCTTTGAACGCA-AGTTGCG-------------CCCCAAGCC-TTCTGGCCGAGGGCACGTCTGCCTGAGTGTC---ACAAAT----CGTCG-------------------TCC---------------------CC---C------CATC--CTCT-----C-----------------------GAG---GAT----------------A-TGGGACG----GAAGCTGATC-TCCCGCGTG----T---TACCG-CACGCGGTTGGCCAAAAT----CCGAGCTA-AGGACG-TCAGAAGCA--TCTT-GACATGCGG----TGGTG------------------AA----------------TTTA-----…
621	>M01634_72_000000000-C3HGL_1_1103_25153_14323	M01634_72_000000000-C3HGL_1_1103_25153_14323	TGCAGAATCCCGTGAACCATCGAGTCTTTGAACGCA-AGTTGCG-------------CCCGAAGCC-ATTAGGCCGAGGGCACGTCTGCCTGGGCGTC---ACACAT--CGCGTCG--------------------TC---------------------CC---C------ACTCCCCCCT-----------------------------GGG---GGC--------------GAGCGGGGGCG----GAGATTGGCC-CCCCGTGCGTGCAT---CCCACGCGCGTGGCCGGCCCAAAT----GCGAATCCGCCATCG---ACGCACG--TCGT-GACCAGTGG----TGGTT------------------GA------------ATCCTCAA-----…
252	>M01634_72_000000000-C3HGL_1_1103_25752_24457	M01634_72_000000000-C3HGL_1_1103_25752_24457	TGCAGAATCCCGTGAACCATCGAGTCTTTGAACGCA-AGTTGCG-------------CCCCAAGCC-TTCTGGCCGAGGGCACGTCTGCCTGGGTGTC---ACAAAT----CGTCG-------------------TCC---------------------CC---C------CATC--CTCT-----C-----------------------GAG---GAT----------------A-GGGGACG----GAAGCTGATC-TCCCGTGTG----T---TTCCG-CACGCGGTTGGCCAAAAT----CTGAGGTA-AGGACG-CCAGGAGCG--TCTT-GACATGCGG----AGGTG------------------AA----------------TTCA-----…
103	>M01634_72_000000000-C3HGL_1_1103_25788_18892	M01634_72_000000000-C3HGL_1_1103_25788_18892	TGCAGAATCCCGTGAACTATCGAGTCTTTGAACGCA-AGTTGCA-------------CCCCAAGCC-TTCTGGCTGAGGGCACGTGTGCCTGGGTGTC---ACAAAT----CGTCG----------------------------------------------------------------------------------------------------------------------------------------------------TGTG----T---TACCG-CATGCGGTTGGCCAAAAT----CCGAGCTA-AGGACG-CCAGGAGCA--TTCT-TACATGCGG----TGGTG------------------AA----------------TTCA-----…
602	>M01634_72_000000000-C3HGL_1_1103_25799_9089	M01634_72_000000000-C3HGL_1_1103_25799_9089	TGAACCATCGAGTCTTTGAACGCAAGTTACGCAAGCCTTCTGGC-------------CGAGGGCAC-GTCTGGCCGAGGGCACGTCTGCCTGGGTGTC---ACAAAC----CGTCG-------T-C----------CC---------------------TC---T------CATC--CT-T-----C-----------------------TCG---GAT----------------A-TGGGACG----GAAACTGGTC-TCCCGTGTG----T---TACCG-CACGCGGTTGGCCAAAAT----CCGAGCTA-AGGGCG-CCTAGAGCG--TCAC-GACATGCGG----TGGTG------------------AA----------------CTAA-----…
248	>M01634_72_000000000-C3HGL_1_1103_27235_12157	M01634_72_000000000-C3HGL_1_1103_27235_12157	TACAGAATCCCGTGAACCATCGAGTCTTTGAACGCA-AGTTGCG-------------CCCCAAGCC-TTCTGGCCGAGGGCACGTCTGCCTCAGTGTC---ACAAAT----CGTCG-------T------------CC---------------------CC---C------CATC--CTCT-----C-----------------------GAG---GAT----------------A-TGGGACG----GAAGCTGGTC-TCCTGTGTG----T---TACCG-CACGCAGTTGGCCAAAAT----CCGAGCTA-AGGATG-CCAGGAGCG--TCCT-GACATGCGG----TGGCG------------------AA----------------TTCA-----…
394	>M01634_72_000000000-C3HGL_1_1103_27840_9654	M01634_72_000000000-C3HGL_1_1103_27840_9654	TGCAGAATCCCGTGAACCATCGAGTCTTTGAACGCA-AGTTGCG-------------CCCGATGCC-ATTAGGTTGAGGGCACGTCTGCCTGGGTGTC---ACATAT----CGAAG--------------------CC---------------------CT----------TCCCCAAATT-----------------------------AAACTTGGT---------------GTGC--------------A--G----CCCGTGAG-----CCATTTGGTCTCATGGTTGGCTGAAAA----TTGAGACC-TTGGCA---GGGTGTG--CCAT-GATTAATGG----TGGTTGTGTGACGCACGAAGCCCAA-------TCATGATCATTGC-----…
55	>M01634_72_000000000-C3HGL_1_1103_28473_11184	M01634_72_000000000-C3HGL_1_1103_28473_11184	TGTAGAATCCCGTGAACCATTGAGTCTTTGAACGCA-AGTTGCG-------------CCCCAAGCC-TTCTGGCCGAGGGCACGTCTGCCTGAGTATC---ACAAAT----CATCG--------T-----------AC---------------------CC---C------CATC--CTCT-----T-----------------------GAG---GAT----------------A-TGGGACG----GAAGCTGATC-TCCCGTGTG----T---TACCG-CATGCGGTTGGCCAAAAT----CTGAGCTA-ACGACG-CCAGGAGCG--TCTT-GACATGCGC----TGGTG------------------AA----------------TTCA-----…
627	>M01634_72_000000000-C3HGL_1_1103_3001_19672	M01634_72_000000000-C3HGL_1_1103_3001_19672	AGCAGAATCCCGTGAACCATCGAGTCTTTGAACGCA-AGTTGCG-------------CCCCAAGCC-TTCTGGCCGAGGGCACGTCTGCCTGGGTGTC---ACAAAT----CGTCA-------T------------CC---------------------CC---C------CATC--CTCT-----C-----------------------GAG---GAT----------------A-TGGGACG----GGAGCTGATC-TCCCGTGTG----T---TACCG-CACGC-----------------------------------AGGAGCG--TCTT-GACATGTGG----TGGTG------------------AA----------------TTCA-----…
705	>M01634_72_000000000-C3HGL_1_1103_5604_16059	M01634_72_000000000-C3HGL_1_1103_5604_16059	TGCAGAATCCCGTGAACCATCGAGTCTTTGAACGCA-AGTTGCG-------------CCCCAAGCC-TTCTGGCCGAGGGCACGTCTGCCTGGGTGTC---ACAAAT----CGTCG-----------------T--CC---------------------CC---C------CATC--CTCT-----C-----------------------GAG---GAT----------------A-TGGGATG----GAAGCTGATC-TCCCGTGTG----T---TACCG-CACGCGGTTGGCCAAAAT----CCAAGCTA-AGGACG-TCAGAAGCG--TCTT-GACATGCGG----TGGTG------------------AA----------------TTTA-----…
758	>M01634_72_000000000-C3HGL_1_1103_5801_22881	M01634_72_000000000-C3HGL_1_1103_5801_22881	TGCAGAATCCCGTGAACAATCGAGTCTTTGAACGCA-AGTTGCG-------------CCCCAAGCC-TTTTGGCCGAGGGCACGTCTGCCTGGGTGTC---ACAAAT----CGTCG--------T-----------CC---------------------CC---C------CATC--CTCT-----C-----------------------GAG---GAT----------------A-TGGGACA----GAAGCTGATC-TCCCATGTG----T---TACCG-CATGCGGTTGGCCAAAAT----CCGAGCTA-AGGACG-CCATGAGCG--TCTT-GACATGCGG----TGGTG------------------AA----------------TTCA-----…
127	>M01634_72_000000000-C3HGL_1_1103_7218_22615	M01634_72_000000000-C3HGL_1_1103_7218_22615	TGCAGAATCCCGTGAACCATCGAGTCTTTGAACGCA-AGTTGCG-------------CCCCAAGCC-TTCTGGCCGAGGGCACGTTTACC------------------------------------------------------------------------------------------T-----C-----------------------AAG---GAT----------------A-TGGTACG----GAAGCTGATC-TCCCGTGTG----T---TACCG-CACGTGGTTGGCCAAAAT----CCAAGCTA-AGGACA-CCAGGAGCA--TCTT-GACATGCGG----TGGTG------------------AA----------------TTCA-----…
186	>M01634_72_000000000-C3HGL_1_1103_7588_10966	M01634_72_000000000-C3HGL_1_1103_7588_10966	TGCAGAATCCCGTGAACCATCGAGTCTTTGAACGCA-AGTTGCG-------------CCCGATGCC-ATTAGGTTGAGGGCACGTCTGCCTGGGCGTC---ACATAT----CGAAG--------------------CC---------------------TC---T---CGCCAATTTCCTA--------------------TATTGATAGGGGTATTGT----------------G-CAGGGCG----AATGTTGGCC-TCCCGTGAA--CTC---TTTTTGGTCATGGTTGGTTGAAAA----TTGAGACC-TTGGTA---GGGTGTG--CCAT-GATAGATGG----TGGTTGTGTGA------------------------------TCCA-----…
625	>M01634_72_000000000-C3HGL_1_1103_7828_3836	M01634_72_000000000-C3HGL_1_1103_7828_3836	TGCAGAATCCCGTGAACCATCGAGTCTTTGAACGCA-AGTTGCG-------------CCCCAAGCC-TTCTGGCCGAGGGCACGTCTGCCTGGGTGTC---ACAAAC----CGTCG--------------------TC---------------------CC----------TCTCATCCTT-----C-----------------------TCG---GAT----------------A-TGGGACG----GAAACTGGTC-TCCCGTGTG----T---TACCG-CACGCGGTTGGCCAAAAT----CCGAGCTA-AGGGCG-CCTAGAGCG--TCAC-GACATGCGG----TGGTG------------------AA----------------CTAA-----…
264	>M01634_72_000000000-C3HGL_1_1103_8514_9154	M01634_72_000000000-C3HGL_1_1103_8514_9154	TACAGAATCCCATGAACCATCGAGTCTTTGAACGCA-AGTTGCA-------------CCCCAAGCC-TTCTGGCCGAGGGCACGTCTGCCTGGGTGTC---ACAAAT----CGTCG------------------TTCC---------------------CC----------CATCCTCTCT------------------------------AG---GAT----------------A-TGGGACG----GAAGCTGGTC-TCCCGTGTG----T---TACCG-CACGCGGTTGGCCAAAAT----CCGAGCTA-AGGACA-CCAAGAGCG--TCTC-GACATGCGG----TGGTG------------------AA----------------TTCA-----…
314	>M01634_72_000000000-C3HGL_1_1103_9856_21416	M01634_72_000000000-C3HGL_1_1103_9856_21416	CGAGATCTACACGGATATCTCCTGGTGCTGGTATGCGATACTTGGTGTGAATTGCAGAATCCCGTGAACCATCGAGTCTTTGAACGCA-AGTTGCG-------------CCCCAAGCC-TTCTGGCCGAGGGCACGTCTGCCTGGGTGTC---ACAAAC----CGTCG--------------------TC---------------------CC---T---CTCATCCTTCTCG-----------------------------------GAT----------------A-TGGGACG----GAAATTGGTC-TCCCGTGTG----T---TACCG-CACGCGGTTGGCCAAAAT-----------------------------------------------…
390	>M01634_72_000000000-C3HGL_1_1104_10667_7918	M01634_72_000000000-C3HGL_1_1104_10667_7918	TGCAGAATCCCGTGAACCATCGAGTCTTTGAACGCA-AGTTGCG-------------CCCGATGCC-ATTAGGTTGAGGGCACGTCTGCCTGGGTGTC---ACATAT----CGAAG--------------------CC---------------------CT----------TCCCCAAATT-----------------------------AAACTTGGT---------------GTGCAGGGTG----AATGATGGCT-TCCCGTGAG-----CCATTTGGTCTCATGGTTGGCTGAAAA----TTGAGACC-TTGGCA---GGGTGTG--CCAT-GATTAATGG----TGGTTGTGTGACGCACGAAGCCCAA-------TCATGATCATTGC-----…
144	>M01634_72_000000000-C3HGL_1_1104_11404_23062	M01634_72_000000000-C3HGL_1_1104_11404_23062	AATTGCAGAATCCCGTGAACCATCGAGTCTTTGAACGCA-AGTTGCG-------------CCCCAAGCC-TTCTGGCCGAGGGCACGTCTGCCTGGGTGTC---ACAAATCGT-CGT----------------------CC---------------------CC---C------CATC--CTCT-----C-----------------------GAG---GAT----------------A-TGGGACG----GAAGCTGATC-TCCCGTGTG----T---TACCG-CACGCGGTTGGCCAAAAT----CCGAGCTA-AGGATT-CCATGAGCG--TCTT-GACATGTGG----TGGTG------------------AA----------------TTCA--…
502	>M01634_72_000000000-C3HGL_1_1104_11785_26263	M01634_72_000000000-C3HGL_1_1104_11785_26263	TGTAGAATCCCGTGAATCACCGAGTCTTTGAACGCA-ATTTGTG-------------CCCAAAGCC-TTTAGGCTGAGGGCACGTCTGCCTGGGCATC---ACGTAT--CCCGTCA-----CAC------------CC---------------------CC---A---ACCCATCCCAACT-----T-----------------------GGGCATGAT-----------GGTTGGTGGGAGCG----AATATTATCC-TCCCGTGTA--------CTCGC-GTTATGGTTGGTCTAAAA----TCGAGCTC-CGGGCG---ACGAACG--TCAC-GACAAGTGG----TGGTC------------TGTAATAG------------CTATTTCA-----…
486	>M01634_72_000000000-C3HGL_1_1104_12659_2780	M01634_72_000000000-C3HGL_1_1104_12659_2780	TACAGAATCCCGTGAATCACCGAGTCATTAAATGCA-AGTTGCG-------------CCCAAAGAC-TTTAGGCTGAGGACACGTCTGCCTGGGCGTC---ACGTAT--CCCGTCG-----CAC------------CC---------------------CC---A---ACCCGTCCCAACT-----T-----------------------GGGCATGAT-----------GGCTGGTGGGTGCG----GATATTAGTT-TCCCATGTA--------CTCGC-ATTATAGTTGGTCTAAAA----TCGATCCT-CGAGCG---ACGAACA--TCAC-GATAAGTGG----TGGTC------------TGTAATAG------------TTATTTCA-----…
467	>M01634_72_000000000-C3HGL_1_1104_13504_11131	M01634_72_000000000-C3HGL_1_1104_13504_11131	TGCAGAATCTCGTGAATTACCGAGTCTTTGAACGCA-ATTTGTT-------------CCCAAAGCC-TTTAGGATGAGGGCATATCTGCCTGGGTGTC---ACGTAT--CTCGTCG-----CA-------------TC---------------------CC---A---ACCTGTCCCAACT-----C-----------------------AGGCATGAT-----------GGCTGGTGGGAGCG----GATATTTTCC-TCCCATGTA--------CACGC-GTTAAGGTTGGTCTCAAA----TCGTACCC-CGAGCG---ACGAACG--TCAC-GACAAGTGG----TGGTC------------TGTAATAG------------CCATTTCG-----…
655	>M01634_72_000000000-C3HGL_1_1104_14862_9485	M01634_72_000000000-C3HGL_1_1104_14862_9485	TGCAGAATCCCGTGAACCATCGAGTCTTTGAACGCA-AGTTGCG-------------CCCGAAGCC-TTCTGGCCGAGGGCACGTCTGCCTGGGCGTC---ACGCAT--CGCGTCG---------------------C---------------------CC---C---CTCCAA-ATCCAC-----------------------------TTG---GAC----------TTGTGAGCGGG-GTG----GAAAATGGTC-TCCCGTGTG--CCT---TTGCG-CCCGCGGCTGGCCTAAAT----ACGATCCT-ACATCG---ATGGATG--TCAC-GACCAGTGG----TGGTTGTA---------------TA----------------CTCA-----…
616	>M01634_72_000000000-C3HGL_1_1104_15830_21111	M01634_72_000000000-C3HGL_1_1104_15830_21111	TGCAGAATCCCGTGAACCATCGAGTCTCTGAACGCA-AGTTGCG-------------CCCCAAGCC-TTCTGGCCGAGGGCACGTCTGCCTGGGTGTC---ACAAAC----CGTCG-------T-C----------CC---------------------TC---T------CATC--CT-T-----C-----------------------TCG---GAT----------------A-TGGGACG----GAAGCTGGTC-TCCCGTGTG----T---TACCG-CACGCGGTTGGCCAAAAT----CCGAGCTA-ATGGCG-CCTAGAGCG--TCAC-GACATGCGG---TCGGTC------------------TT----------------TCTT-----…
249	>M01634_72_000000000-C3HGL_1_1104_16720_18698	M01634_72_000000000-C3HGL_1_1104_16720_18698	TGCAGAATCCTGTGAACCATCGAGTCTTTGAACGCA-AGTTGCG-------------CCCCAAGCC-TTCTGGCCGAGGGCACGTCTGCCTGGATGTC---ACAAAT----CATCG--------T-----------CC---------------------CC---C------CATC--CTCT-----T-----------------------GAA---GAT----------------A-TGGGACG----GAAGCTGATC-TCCTGTGTG----T---TACCG-CACGCTGTTGGCCAAAAT----CCAAGCTA-AGGACG-CCAAGAGCG--TCTT-GACATGCGG----TGGTG------------------AA----------------TTTA-----…
440	>M01634_72_000000000-C3HGL_1_1104_16949_3562	M01634_72_000000000-C3HGL_1_1104_16949_3562	TGCAGAATCCCGTGAACCATCGAGTCTTTGAACGCA-AGTTGCG-------------CCCCAAGCC-TTCTGGCCGAGGGCACGTCTGCCTGGGTGTC---ACAAAT----CGTCG--------T-----------CC---------------------CC---C------CATC--CTCT-----C-----------------------GAG---GAT----------------A-GGGGACG----GAAGCCGATC-TCCCGTGTG----T---TACCG-CATGCGGTTGGCCAAAAT----CCAAGCTA-CGGACG-CTAGGAGCG--TCTT-GACATGCGG----TGGTG------------------AA----------------TTCA-----…
225	>M01634_72_000000000-C3HGL_1_1104_17894_3850	M01634_72_000000000-C3HGL_1_1104_17894_3850	TGCAGAATCC-CGTGAAC-------------CATCAAGCC-TTCTGGCTGAGGGCAAGTTTGCCTGGGTGTC---ACAAAT----TTTCG-------------------TCC---------------------CC---C------CATC--CTCT-----C-----------------------GAG---GAT----------------A-TGGGACG----GAAGCTGATC-TCCCGTGTG----T---TACCG-CACGCGGTTGGCCAAAAT----CCGAGCTA-AGGACG-TCAGGAGCG--TCTT-GACATGCGG----TGGTG------------------AA----------------TTTA--------------------ATT--------…
786	>M01634_72_000000000-C3HGL_1_1104_18239_25158	M01634_72_000000000-C3HGL_1_1104_18239_25158	TGCAGAATCCCGTGAACCATCGAGTCTTTGAACGCA-AGTTGCG-------------CCCCAAGCC-TTCTGGCCGAGGGCACGTCTGCCTGGGTGTC---ACAAAT----CGTCA-------T------------CC---------------------CC---C------CATC--CTCT-----C-----------------------GAG---GAT----------------A-TGGGACG----GAAGCTGATC-TCCCGTGTG----T---TACCG-CACGCAG-----------------------------------GAGCG--TCTT-GACATGCGG----TGGTG------------------AA----------------TTCA-----…
58	>M01634_72_000000000-C3HGL_1_1104_18824_5996	M01634_72_000000000-C3HGL_1_1104_18824_5996	TGCAGAATCCCGTGAACCATCGAGTCTTTGAACGCA-AGTTGCG-------------CCCGAAGCC-ATTAGGCCGAGGGCACGCCTGCCTGGGCGTC---ACACGC----TGTTG-------CCC----------CC---------------------CC---G------CGCC-TCCCT-----C-----------------------GGG---AGC-----GTC-G-----G---GGGGCG----GACGATGGCC-TCCCGTGCG----T---CACCC-CGCGCGGTTGGCACAAAT---GCCGAGTCC-TCGGCG---ACGAACG--CCAC-GACAATCGG----TGGTTG---------------TCAA------------A-CCTCGG-----…
692	>M01634_72_000000000-C3HGL_1_1104_19131_8453	M01634_72_000000000-C3HGL_1_1104_19131_8453	TGCAGAATCCCGTGAACCATCGAGTCTTTGAACAGA-AGTTGTG-------------CCCGAAGCC-GTTACGTCGTGGGCACGTCTGCTTGGGCGTC---TCACAT--CGCGTCG--------------------CC---------------------CC---C------CACACA-CCT-----C-----------------------GGG--TGCTA---------------G-GGGGGTG----GATAATGGCC-CCCCGTGCG----C---TGCAAGTTCGCAGTCGGCCCAAAA---AATGAGTCA-CTGACG--AC-TGACG--TCAC-GACAAGTGG----TGGT----AGAG-----------AA----------------ATCA-----…
241	>M01634_72_000000000-C3HGL_1_1104_20746_19747	M01634_72_000000000-C3HGL_1_1104_20746_19747	GGGGGGGGGGGGGGGGGGGGGGGGTGGGGGGGGGCG-GGGGGCG-------------CCCGAAGCC-ACTAGGCTAAGGGCACGTCTGCCTGGGTGTC---ACGCAT-CT-AGTTG--------------------CC---------------------CC---C---TGACCAAACTAAT-----CTTCT-------------------AAG---AGATTTTGTCG---GT--TT-GGGGGCG----GAAATTAGCC-TCCTGTGC---------CATGT-TGTGCGGCTGGCGTAAAA----CTGAGTCT-ATGGTG---ACGAATG--TCAC-GACAT-CGG----TGGTTGTA-------------AGAA------------GACCTTCT-----…
221	>M01634_72_000000000-C3HGL_1_1104_22790_12502	M01634_72_000000000-C3HGL_1_1104_22790_12502	TGCAGAATCCCGTGAACCATCGAGTCTTTGAACGCA-AGTTGCG-------------CCCGAAGCC-ATTAGGCCGAGGGCACGCCTGCCTGGGTGTT---GCACAT----CGTTG--------------------CC---------------------CC---C---GTGCCTTGGCCAC-----GTGCC-------------------AGG---CAC-----------CA--AG-CGGGGCG----AATGTTGGCT-TCCCGCGAG----C---AATGT-CTCACGGTTGGTTGAAAA----CTGAGTCC-GCGGTG---GAGGGCG--CCGT-GATGGATGG----TGGCTGAGTTAAAGCATATCAATAA-----------------GCG-----…
509	>M01634_72_000000000-C3HGL_1_1104_23010_9588	M01634_72_000000000-C3HGL_1_1104_23010_9588	TGCAGAATCCCGTGAATCACCGAGTCTTTGAACGCA-AGTTGCG-------------CCCAAAGCC-TTTAGGCTGAGGGCACGTCTTCCTTGGCGTC---ACGTAT--CCCGTCG-----CAC------------CC---------------------CT---A---ACGCGTCCCAACT-----C-----------------------AGGTATGAT-----------GGCTGGTGGGAGTG----GATATTGGCC-TCCCATGTA--------CTCAC-ATTATGGTTGGTCTAAAA----TCAAGCCC-TGAGCG---ACGAACG--TCAC-GATAAGTGG----TGGTC------------TGTAATAG------------CTATTTTG-----…
399	>M01634_72_000000000-C3HGL_1_1104_23398_4287	M01634_72_000000000-C3HGL_1_1104_23398_4287	TGCAGAATCCCGTGAACCATCGAGTCTTTGAACGCA-AGTTGCG-------------CCCCAAGCCTTCT-GGCCGAGGGCACGTATGTCTGGGTGTC---ACAAAT----CGTTG--------T-----------CC---------------------CC---C------CATC--CTCT-----C-----------------------GAG---GAT----------------A-TGGGTCG----GAAGCTGATC-TCCTGTGTG----C---TACCG-CACGCGGTTGGCCAAAAT----CCTAGCTA-AGGACG-TCAGGAGCG--TCTT-GACATGCGG----TGGTG------------------AA----------------TTCA-----…
468	>M01634_72_000000000-C3HGL_1_1104_23448_10267	M01634_72_000000000-C3HGL_1_1104_23448_10267	TGTAGAATCTCGTGAATCACCGAGTCTTTGAACGCA-AGTTGCG-------------CCCAAAGCC-TTTAGGCTGAGGGCACGTCTGCCTGGGCGTC---ACGTAT--CCCGTCG--------------------------------------------C-------A-CC--CCCAACT-----C-----------------------GGGCATGAT-----------GGCTGGTGGGAGCG----GATATTGGCC-TCCCGTGTA--------CTCGC-GTTACGGTTGGTCTAAAA----TTGAGCCC-CGAGCA---ACGAACG--TCAC-GACAAGTGG----TGGTC------------TGTAATAG------------CTATTTCG-----…
710	>M01634_72_000000000-C3HGL_1_1104_24277_22376	M01634_72_000000000-C3HGL_1_1104_24277_22376	TGCAGAATCCTGTGAACCATCGAGTCTTTGAACGCA-AGTTGCG-------------CCCCAAGCC-TTCTGGCCGAGGGCACGTCTGCCTGGGTGTC---ACAAAT----CGTCG-------T------------CC---------------------CC---C------CATC--CTCT-----C-----------------------GAG---GAT----------------A-TGGGATG----GAAGCTGATC-TCCCGTGTG----T---TACCG-CACGCGGTTGGCCAAAAT----CCGAGCTA-AGGACG-TCAGGAGCG--TCTT-GACATGCGG----TGGTG------------------AA----------------TTCA-----…
151	>M01634_72_000000000-C3HGL_1_1104_24376_23923	M01634_72_000000000-C3HGL_1_1104_24376_23923	TGCAGAATCCCGTGAACCATCGAGTCTTTGAACGCA-AGTTGCG-------------CCCCAAGCC-TTCTGGCCGAGGGCACGTCTGCCTGGGTGTC---ACAAAT----ATTCG-------------------TCC---------------------CC---C------CATC--CTCT-----C-----------------------GAG---GAT----------------A-GGGGACG----GAAGCTGATC-TCCCGTGTG----T---TACCG-CATGCGGTTGGCCAAAAT----CCAAGCTA-AGGACG-CCAGGAGCG--TCTT-GACATGCGG----TGGTG------------------AA----------------TTTA-----…
647	>M01634_72_000000000-C3HGL_1_1104_26389_22638	M01634_72_000000000-C3HGL_1_1104_26389_22638	TGCAGAATCCCGTGAACCATCGAGTTTTTGAACGCA-AGTTGCG-------------CCCGAGACC-TTTAGGTTGAGGGCACGTCTGCCT--G-G--------------GCGTCG--------------------CT---------------------CT---A------CACCAACCTA-----------------------------GTT---GGT----------------A-GGGAGCG----GATATTGGCC-CCCCGAGTC--------CTTTG-GGCACGGTCGGCACAAAT----ATTGGTCC-CCGGCA---GCGAGTG--TCGC-GGTCAGCGG----TGGTTGTATTTTCCTCCAAAGACAA-------AATGACGCGTTC------…
179	>M01634_72_000000000-C3HGL_1_1104_26565_23158	M01634_72_000000000-C3HGL_1_1104_26565_23158	TGCAGAATCCCGTGAACCATCGAGTCTTTGAACGCA-AGTTGCG-------------CCCGATGCC-ATTAGGTTGAGGGCACGTCTGCGTGGGTGTC---ACATAT----CGAAG--------------------CC---------------------TC---C---TGCCAATTTCCTT-----------------------------TTGACAGGT------------ATTGTGCAGGGTG----GATGTTGGCC-TCCCGTGAGCTC-----TTTTGTCTCATGGTTGGTTGAAAA----TTGAGACC-TTGGTA---GGGTGTG--CCAT-GATAAATGG----TGGTTGTGTGACCCACGA-----GA-------------------------…
473	>M01634_72_000000000-C3HGL_1_1104_27946_13833	M01634_72_000000000-C3HGL_1_1104_27946_13833	TACAGAATCCCGTGAATCACTGAGTCTTTGAATAAA-AGTTGTG-------------CCCAAAGCC-TTTAGGCTGAGGGCACGTTTGCCTGGGCGTT---ACGTAT--CCCATCG-----CAC------------CC---------------------CC---A---ACCCGTCCCAACT-----T-----------------------GGGCATGAT-----------GGCTAGTGGGAGTG----GATATTGGCC-TCCCATGTA--------CTCGC-GTTACAGTTTGTCTAAAA----TTGAACCC-CAAGCG---ATGAACG--TCAC-GATAAGTGG----TGGTC------------TGTAATAG------------CTATTTTG-----…
414	>M01634_72_000000000-C3HGL_1_1104_4668_21977	M01634_72_000000000-C3HGL_1_1104_4668_21977	TGCAGAATCCCGTGAACCATCGAGTCTTTGAACGCA-AGTAGCG-------------CCCGAAGCC-TTCTGGCCGAGGGCACGCCTGCCTGGGCGTC---ACGCAT--CGCGTCG--------------------CC---------------------CC---C---CTCCAACGTCCCT-----------------------------AGG---GAC----------TCGCGAGCGGGAGCG----GAAAATGGTC-TCCCGTGTG--CC-----AAGG-CCCGCGGCTGGCCTAAAT----GAGATCCT-GCATCG---ACGGATG--TCAC-GACCAGTGG----TGGTTG--------------------------------------------…
615	>M01634_72_000000000-C3HGL_1_1104_5726_15323	M01634_72_000000000-C3HGL_1_1104_5726_15323	TGCTGGTATGCGATACTTGGTGTGAATTGCAGAATCCCGTGAACCATCGAGTCTTTGAACGCA-AGTTGCG-------------CCCGAGGCC-TCCTGGTCGAGGGCACGTCTGCCTGGGTGTC---ACGCAT----CGTCG--------------------CC---------------------CC---C--------GCTCCCCT-----C--------------------------------------------------GGACACG----G----------TCGTGCGCG--------TGCTT-------GTCGTCC---------CCGGGACC-------------------TCCCGGACCCCCGAGCATTGGCT------------------…
118	>M01634_72_000000000-C3HGL_1_1104_6303_15741	M01634_72_000000000-C3HGL_1_1104_6303_15741	TGCAGAATCCCGTGAACCATCGAGTCTTTGAACGCA-AGTTGCA-------------CCCCAAGCC-TTCTGGCCGAGGGCATGTCTGCTTGGGTGTC---CAAAAT----CGTTG--------T-----------CC---------------------CC---C------TATC--CTCT-----C-----------------------GAG---GAT----------------A-TGGAACG----GAAGCTGATC-TCCCATGTG----T---TACCG-CACACGGTTGGCCAAAAT----CCGAGCTA-AGGACG-CCAGGAGCA--TGTT-GACATGCGG----TGGTG------------------AA----------------TTCA-----…
593	>M01634_72_000000000-C3HGL_1_1104_8127_8507	M01634_72_000000000-C3HGL_1_1104_8127_8507	TGCAGAATCCCGTGAACCATCGAGTCTTTGAACGCA-AGTTGCG-------------CCCGAAGCC-ATTAGGCCGAGGGCACGCCTGCCTGGGCGTC---ACACGT----CGTTG--------------------CC---------------------CC---C------CCAAACCCCT-----C-----------------------GGG---AGT--------------TGGGCGGGACG----GATGATGGCC-TCCCGTGTG--------CTCTGTCATGCTGTT-GCATCGAT----TC--GT-C-GATGCT---TTCAACG--CGAC-CCCAGGTCA----GGCGGGGT---------------TA-------------CCCGCTG-----…
98	>M01634_72_000000000-C3HGL_1_1104_8385_14499	M01634_72_000000000-C3HGL_1_1104_8385_14499	TGCAGAATCCCGTGAACCATCGAGTCTTGGAACGCA-AGTTGCG-------------CCCCAAGCC-TTCGGGCCGAGGGCACGTCTGCCTGGGTGTC---ACAAAT----CGTCG-------T------------CC---------------------CC---C------CATC--CTCT-----C-----------------------GAG---GAT----------------A-TCGGACG----GAAGCTGGTC-TCCCGTGTG----T---TACCG-TACGCGGTTGGACAAAAT----CTGAGCTA-AGGATG-CCAGGAGCG--TCTT-GACACGCGG----TGGTG------------------AA----------------TTCA-----…
227	>M01634_72_000000000-C3HGL_1_1104_8981_13803	M01634_72_000000000-C3HGL_1_1104_8981_13803	TGCAGAATCCCGTGAACCATCGAGTCTTTGAACGCA-AGTTGCA-------------CCCCAAGCC-TTCTGGCCGAGGGCATGTCTGCTTGGGTGTC---CAAAAT----CGTTG--------T-----------CC---------------------CC---C------TATC--CTCT-----C-----------------------GAG---GAT----------------A-TGGAACG----GAAGCTGATC-TCCCATGTG----T---TACCG-CACACGGTTGGCCAAAAT----CCAAGCTA-AGGACG-TCAGAAGCG--TCTT-GACATGCGG----TGGTG------------------AA----------------TTTA-----…
618	>M01634_72_000000000-C3HGL_1_1104_9252_10532	M01634_72_000000000-C3HGL_1_1104_9252_10532	CGAGATCTACACACTATCTGCCTGGTGCTGGTATGCGATACTTGGTGTGAATTGCAGAATCCCGTGAACCATCGAGTCTTTGAACGCA-AGTTGCG-------------CCCGAGGCC-TCCTGGTCGAGGGCACGTCTGCCTGGGTGTC---ACAAAC----CGTCG--------------------TC---------------------CC---T---CTCATCCTTCTCG-----------------------------------GAT----------------A-TGGGACG----GAAATTGGTC-TCCCGTGTG----T---TACCG-CACGCGGTTGGCCAAAAT-----------------------------------------------…
750	>M01634_72_000000000-C3HGL_1_1105_10861_2337	M01634_72_000000000-C3HGL_1_1105_10861_2337	TGCAGAATCCCGTGAACCATCGAGTTTTTGAACGCA-AGTTGCG-------------CCCGAAGCC-ATTATGCTGAGGGCACGTCTGCCTGGGCGTC---ACGCAT-AG-CGTCA--------------------CC---------------------CT---C------CACCTCCGTC-----CCTAAACGGGTTGT----------AGG---CGT----------------T-TGGGTTG----GATATTGGCC-TCCCGTGAG----T---CTCGG-TGTGCGGTTGGCCTAAAT----GTGATTCA-GCATCG-----ACGTA--TGCTCGACAATTGG----TGGTTG-----------------AA------------GAACTCAA-----…
773	>M01634_72_000000000-C3HGL_1_1105_13215_22904	M01634_72_000000000-C3HGL_1_1105_13215_22904	TGCAGAATCCCGTGAACCATCGAGTCTTTGAACGCA-AGTTGCG-------------CCCCAAGCC-TTCTGGCCGAGGGCACGTCTGCCTGAGTATC---ACAAAT----CATCG--------T-----------CC---------------------CC---C------CATC--CTCT-----T-----------------------GAG---GAT----------------A-TGGGATG----GAATCTGATC-TCCCGTGTG----T---TACCG-CATGCGGTTGGCCAAAAT----CTGAGCTA-ACGACG-CCAGGAGCG--TCTT-GACATGCGC----TGGTG------------------AA----------------TTTA-----…
565	>M01634_72_000000000-C3HGL_1_1105_13824_9563	M01634_72_000000000-C3HGL_1_1105_13824_9563	TGCAGAATCCCGTGAACCATCGAGTCTTTGAACGCA-AGTTGCG-------------CCCCAAGCC-TTCTGGCCGAGGGCACGTCTGCCTGGGTGTC---ACAAAT----CGTCG--------T-----------CC---------------------CC---C------CATC--CTCT-----C-----------------------GAG---GAT----------------A-TCGGACG----GAAGCTGGTC-TCCCGTGTG----T---TACCG-CATGCGGTTGGCCAAAAT----CCAAGCTA-AGGACG-TCAGAAGCG--TCTT-GACATGCAG----TGGTG------------------AA----------------TTCA-----…
134	>M01634_72_000000000-C3HGL_1_1105_14221_17736	M01634_72_000000000-C3HGL_1_1105_14221_17736	TGCATAATCCCGTGAACCATCGAGTCTTTGAACGCA-AGTTGCG-------------CCCCAA--------GGCCTAGGGGACGTATGTCTGGGTGTC---ACAAAT----CGTTG--------T-----------CC---------------------CC---C------CATC--CTCT-----C-----------------------GAG---GAT----------------A-TGGGTCG----GAAGCTGATC-TCCTGTGTG----C---TACCG-CACGCGGTTGGCCAAAAT----CCTAGCTA-AGGACG-TCAGGAGCG--TCTT-GACATGCGG----TGGTG------------------AA----------------TTCA-----…
648	>M01634_72_000000000-C3HGL_1_1105_14803_3254	M01634_72_000000000-C3HGL_1_1105_14803_3254	TGCAGAATCCCGTGAACCATCGAGTCTTTGAACGCA-AGTTGCG-------------CCCCAAGCT-TTCTGGCCGAGGGCACGTCTGGCTGGGTGTC---ACAAAT----ATTCG-------------------TCC---------------------CC---C------CATC--CTCT-----C-----------------------GAG---GAT----------------A-GGGGACG----GAAGCTGATC-TCCCGTGTG----T---TACCG-CATGCGGTTGGCCAAAAT----CCAAGCTA-AGGACA-TCAGTAGCG--TCTT-GACATGCGG----TGGTG------------------AA----------------TTTA-----…
594	>M01634_72_000000000-C3HGL_1_1105_14928_1928	M01634_72_000000000-C3HGL_1_1105_14928_1928	TGCAGAATCCCGTGAACCATCGAGTCTTTGAACGCA-AGTTGCG-------------CCCCAAGCC-TTCTGGCCGAGGGCACGTCTGCCTGGGCGTC---ACACGT----CGTTGC-------------------CC---------------------CC---C-----CCAAACCCCTC-----------------------------GGG---AGT--------------TGGGCGGGACG----GATGATGGCC-TCCCGTGTG--------CTCTGTCATGCGGTTGGCAT-AAA---AACAAGTCC-TCGGCG---ACTAACG--CCAC-GACAATCGG----TGGTTGTC---------------AA-------------ACCTCTG-----…
220	>M01634_72_000000000-C3HGL_1_1105_15737_27871	M01634_72_000000000-C3HGL_1_1105_15737_27871	TCCAAAATCCCGTGAACCATCGAGTCTTTAAACGCA-AGTTGCG-------------CCCGAAGTC-CTTAGGCCGAGGGCACGTCTGCCTGGGCATC---TCACAT--TGCATCG--------------------CC---------------------CC---C------CACACACCCT-----C-----------------------GGG---TGT----------------T-GGGGGCG----GATAATGGCC-CCCCGTGAG----C---TGTAGGTTCGTGGCCGGCCCAAAA---AACGAGTCA-CCAGTG--ACTTAACA--TCAC-GACAAGTGG----TGGT----AGAG-----------AA----------------TTCA-----…
129	>M01634_72_000000000-C3HGL_1_1105_15769_8550	M01634_72_000000000-C3HGL_1_1105_15769_8550	TGTAGAATCCCGTGAACAATCGAGTCTTTGAACGCA-AGTTGCA-------------CCCCAAGCC-TTCTGGCTAAGGGCACGTCTGCATGGGTGTC---ACAAAT----CATCG-------------------TCC---------------------CC---C------CATC--CTCT-----C-----------------------GAG---GAT----------------A-TGGGACG----GCAGCTGATC-TCCCGTGTG----T---TACCG-CACGCGGTTGGCCAAAAT----CCAAGCTA-AGGACA-CCAGGGGCA--TCTT-GACATGCGG----TGGTG------------------AA----------------TTCA-----…
95	>M01634_72_000000000-C3HGL_1_1105_16021_6456	M01634_72_000000000-C3HGL_1_1105_16021_6456	TGCAGAATCCCGTGAACCATCGAGTCTTTGAACGCA-AGTTGCG-------------CCCCAAGCC-ATTCGGCCGAGGGCACGTCTGCCTGGGTGTC---ACGCAT----CGTTG--------------------CC---------------------CC---C------GAAC--CCCT-----CCTCCTCGCGTCGTACGCGGGGCGGGG---GGT-----CCC---GT--CG-CGGG-CG----GAGACTGGCC-TCCCGTGGG----C---CTCGG-CCCGCGGTTGGCCCAAAT----ACGAGTCC-TCGGCG---GTGTATG--CCGC-GGCGTTCGG----TGGCGG---------------AAAA------------AACCTCGA-----…
779	>M01634_72_000000000-C3HGL_1_1105_16501_25722	M01634_72_000000000-C3HGL_1_1105_16501_25722	GCGATACTTGGTGTGAATTGAAGAATCTTGTGAACCATCGAGTCTTTGAACGCA-AGTTGTG-------------CCCTAGGCC-TTCTGGTCGAGGGCACGTCTGCCTGGGCGTC---ACGTAG--GGCGTCA------------------------------------------------------------------------------------------------------------------------------------AGTGGTGGCT-TCAAATACC-------ATTTCGGTGACCGGTTGGCT---------CCGCGGCC-ATAGTT---GGGACCGAATC---GACCCGCAG---------------------------AG-------…
805	>M01634_72_000000000-C3HGL_1_1105_17272_21554	M01634_72_000000000-C3HGL_1_1105_17272_21554	TGCAGAATCCCGTGAACCATCGAGTCTTTGAACGCA-AGTTGCG-------------CCCCAAGCC-TTCTGGCCGAGGGCACGTCTGCCTGGGTGTC---ACAAAT----CGTCG-------------------TCC---------------------CC---C------TATC--CTCT-----C-----------------------GAG---GAT----------------A-TGGGACG----GAAGCTGATC-TCCCGTGTG----T---TACCG-CACGCGGTTGGCCAAAAT----CCAAGCTA-AGGACG-TCAGAAGCG--TCGT-GACATGCGG----TGGTG------------------TA----------------TTTA-----…
93	>M01634_72_000000000-C3HGL_1_1105_17847_23146	M01634_72_000000000-C3HGL_1_1105_17847_23146	TGCAGAATCCCATGAACCATCTAGTCTTTGAGCGCA-AGTTGCG-------------CCCCAAGCC-TTCTGGCCGAGGGCACGTCTGCCTGGGTGTC---ACAAAT----CGTCG--------T-----------CC---------------------CC---C------CATC--CTCT-----T-----------------------GAG---GAT----------------A-TGGGACG----GAAGTTGATC-TCCCGTGTG----T---TCTCG-CACGCGGTTGGCCAAAAT----CCGAGCAA-AGGACG-TCAGGAGCG--TCTT-GACATGCGG----TGGTG------------------AA----------------TTTA-----…
278	>M01634_72_000000000-C3HGL_1_1105_18288_19267	M01634_72_000000000-C3HGL_1_1105_18288_19267	TGTAGAATCCCGTGAACCATCAAGTCTTTGAACGCA-AGTTGCA-------------CCCCAAGCC-TTCTAGCCGAGGGCACGTCTGCCTGGGTGTC---ACAAAT----CGTCG-------T------------CC---------------------CC---C------CATC--CTCT-----C-----------------------GAT---GAT----------------A-TGGGAC-----GAAGCTGATC-TCCCGTGTG----T---TACCG-CACGCGGTTGGCCAAAAT----CCAAACTA-AGGATG-CCTGGAGCG--TCTT-GACATGCGC----TGGTG------------------AA----------------TTCA-----…
110	>M01634_72_000000000-C3HGL_1_1105_19501_13110	M01634_72_000000000-C3HGL_1_1105_19501_13110	TGCAGAATCCTGTGAACCATCGAGTCTTTGAACGCA-AGTTGCA-------------CCCCAAGCC-TTCTGGCCGAGGGCGCGTCTGCCTAGGTGTC---ACAAAT----CGTCG--------T-----------CC---------------------CC---C------CATC--CTCT-----C-----------------------GAG---GAT----------------A-TGGGACG----TAAGCTGATC-TCCCGTGTG----T---TACCG-CCCGTGAT-------------------------GACG-CCAGGAGGG--TCTT-GACATGCGG----TGGTG------------------AA----------------TTCA-----…
132	>M01634_72_000000000-C3HGL_1_1105_20320_24729	M01634_72_000000000-C3HGL_1_1105_20320_24729	TGCAGAATCTCGTGAACCATGGAGTCTTTGAACGCA-AGTTGCG-------------CCCCAAGCC-TTCTGGCCGAGGGCACGTCTGCCTTGGTGTC---ACAAAT----CATCG--------T-----------CC---------------------CC---C------CATC--CTCT-----C-----------------------GAG---GAT----------------A-TGGGACA----GAAGCTGAAC-TCCCGTGTG----T---TACCG-CACGCGGTTGGCCAAAAT----CCGAGCTA-AGGACG-CCAGGAGCA--TCTT-GACATCCGA----TGGTG------------------AA----------------TTCA-----…
330	>M01634_72_000000000-C3HGL_1_1105_20948_11856	M01634_72_000000000-C3HGL_1_1105_20948_11856	TGCAGAATCCCGTGAACCATCGAGTCTTTGAACGCA-AGTTGCG-------------CCCCAAGCC-TTCTGGCCGAGGGCACGTCTGCCTGGGTGTC---ACAAAT----CGTCG-------T------------CC---------------------CC---C------CATC--CTCT-----C-----------------------GAG---GAT----------------A-TGGGACG----GAAGCTGATC-TCCCGTGTG----T---TACCGCACATGCGGTGGTGAATTCAATTCTCATCAA-ATCATC-AGTCGTTTCG-GTCC-GA-AAGCTC----TTGAT------------------GA----------------CCCA-----…
412	>M01634_72_000000000-C3HGL_1_1105_21592_13335	M01634_72_000000000-C3HGL_1_1105_21592_13335	TGCAAAATCCCGTGAACCATCGAGTCTTTGAACGCA-AGTTGCA-------------CCCGAAGCC-TTCTGGCCGAGGGCACGCCTGCCTGGGCGTC---ACACAT--CGCGTCG--------------------CCT--------------------CC---C---CTCCAACGTCCCT-----------------------------ATG---GAC----------TCGCAAGAGGGAGCG----GAAAATGGTC-TCCCGTGTG--CCT---TCTGG-CCCGTGGCTGGCCTAAAT----GAGATCCT-GCATTG---ACGGATG--TCAC-GACTAGTGG----TGGTTGAA---------------AA----------------CTCA-----…
419	>M01634_72_000000000-C3HGL_1_1105_22925_12644	M01634_72_000000000-C3HGL_1_1105_22925_12644	TGCAGAATCCCGTGAACCATCGAGTCTTTGAACGCA-AGTTGCG-------------CCCGAAGCC-TTCTGGCCGAGGGCACGCCTTCCTGGGCATC---ACGCAT--CTCGTCG--------------------CC---------------------CC---C---CTCTAACGTCCCT-----------------------------AGG---GAC----------TCGC--GAGGGAGCA----GAAAATGGTC-TCCCGTGTG--CCT---TCTGG-CCCGTGGCTGGCCTAAAT----GAGATCCT-GCATCG---ACGGATG--TCAC-GACCAGAGG----TGGCTGAA---------------AA----------------CCCA-----…
373	>M01634_72_000000000-C3HGL_1_1105_26289_8538	M01634_72_000000000-C3HGL_1_1105_26289_8538	TGCAGAATCCCGTGAACCATCGAGTCTTTGAACGCA-AGTTGCG-------------CCTGATGCC-ATTAGGTTGAGGGCACGTCTGCCTGGGCGTC---ACATAT----CGAAG--------------------CC---------------------TC---T---TGCCAATTTCCTA-----------------------------TTGATTGGT----------------A-TTGTGCAAGATGATGTTGGCC-TCCCGTGAG--CAC---CATCGCCTCATGGTTGGTTGAAAA----TTGAGACC-TTGGTA---GGGTGTG--CCAT-GATAGATGG----TGGTTGTGTGA------------------------------TCCA-----…
548	>M01634_72_000000000-C3HGL_1_1105_2785_12128	M01634_72_000000000-C3HGL_1_1105_2785_12128	TGAAGAATCCCATGAACCATCGAGTCTTTGAACGCA-AGTTGCG-------------CCCCAAGCC-TTCTGGCCGAGGGCACGTCTGCCTGGGTGTC---ACAAAT----CGTCG-------------------TCC---------------------CC---C------CATC--CTCT-----C-----------------------GAG---GAT----------------A-TGGGATG----GAAGCTGATC-TCCCGTGTG----T---TACCG-CACGCGGTTGGCCAAAAT----CCTAGCTA-AGGATG-CCAGGAGCG--TCTT-GACATGCGG----TGGTG------------------AA----------------TTTA-----…
450	>M01634_72_000000000-C3HGL_1_1105_6068_24432	M01634_72_000000000-C3HGL_1_1105_6068_24432	TGCAGAATCCCGTGAACCATCGAGTCTTTGAACGCA-AGTTGCG-------------CCCGAGGCC-TCCTGGTCGAGGGCACGTCTGCCTGGGTGTC---ACGCAT----CGTCG--------------------CC---------------------CC---C------GCTCCCCTCGACTCAC-----------------------GAG---GGC------------------GGGGGAG----GATACTGGTC-TCCCGCGTG----A--TGGTCG-CCATGACAAGTTGTGGTT----GAGAGACCCTCGGAC---ACGGTCG---TGC-GAGTGCTTG----TCGCCCCT---------------GG-------------------------…
270	>M01634_72_000000000-C3HGL_1_1105_6199_18789	M01634_72_000000000-C3HGL_1_1105_6199_18789	TGTAGAATCCCGTGAACCATCGAGTCTTTGAACGCA-AGTTGCG-------------CCCCAAGCC-TTCTGGTCGAGGGCACGTCTGCCTGGGTGTC---ACAAAT----CATCG--------T-----------CC---------------------CC---C------CATC--CTCT-----C-----------------------GAG---GAT----------------A-TGGGACG----GAAGCTGATC-TCACGTGTG----T---TACCG-CACGCGGTTGGCCAAAAT----CCGAGCTA-AGGACG-CCAGGAGCG--TCTT-GACATGCGG----TGGTG------------------AA----------------TTCA-----…
155	>M01634_72_000000000-C3HGL_1_1105_6338_15063	M01634_72_000000000-C3HGL_1_1105_6338_15063	TGCAGAATCCCGTGAACCATCGAGTCTTTGAACGTA-AGTTGCG-------------CCCCAACCC-TTCTAGCCGAGGGCACGTCTGCCTGGGTGTC---ACAAAT----CTTCA--------T-----------CC---------------------CC---C------CATC--CTCT-----C-----------------------GAG---GAT----------------A-GGGGACG----AAAGCTTATC-TCCCGTGTG----T---TACCG-CACGTGGTTGGCAAAAAT----CCGAGCTA-AGGATG-CCAGGAGCA--TCTT-GACATGTGG----TGGTG------------------AA----------------TTCA-----…
16	>M01634_72_000000000-C3HGL_1_1105_6709_7392	M01634_72_000000000-C3HGL_1_1105_6709_7392	TGCAGAATCCCGTGAACCATCGAGTCTTTGAACGCA-AGTTGCG-------------CCTGATGCC-ATTAGGTTGAGGGCACGTCTGCCTGGGCGTC---ACATAT----CGAAG--------------------CC---------------------TC---T---TGCCAATTTCCTA-----TTGAT-------------------TGG---TAT-------------TGTG-CAAGATG-----ATGTTGGCC-TCCCGTGAG----CAC-CATCGCCTCATGGTTGGTTGAAAA----TCGAGACC-TTGGTA-----GAGTGTGCCAT-GATAAATGG----TGCATGTGTTAAGCACGAGACCAAA-------------------------…
342	>M01634_72_000000000-C3HGL_1_1105_7847_24102	M01634_72_000000000-C3HGL_1_1105_7847_24102	TGCAGAATCCCGTGAACCATTGAGTCTTTGAACGCA-AGTTGTT-------------CCCCAAGCC-TTCTGGCCGAGGGCACGTCTGCCTGGGTGTC---ACAAAT----CGTCG-------------------TCC---------------------CC---C------CATC--CTCT------------------------------------AT----------------A-TGGGACG----GAAGCTGATC-TCCCGTGTG----T---TACCG-CACGCGGTTGGCCAAAAT----CCAAGCTA-AGGACG-TCAGGAGCG--TCTT-GACATGCGG----TGGTG------------------AA----------------TTTA-----…
17	>M01634_72_000000000-C3HGL_1_1105_8831_22924	M01634_72_000000000-C3HGL_1_1105_8831_22924	TGCAGAATCCCGTGAACCATCGAGTCTTTGAACGCA-AGTTGCG-------------CCCCAAGCC-TTCTGGCCGAGGGCACGTCTGCCTGGGTGTC---ACAAAT----CGTCG-------T------------CC---------------------CC---C------CATC--CTCT-----C-----------------------GAG---GAT----------------A-TCGGACG----GAAGCTGGTC-TCCCGTGTG----T---TACCG-CACGCGGTTGGCCAAAAT----CCTAGCTA-AGGATG-CCAGGAGCG--TCTT-GACATGCGG----TGGTG------------------AA----------------TTCA-----…
109	>M01634_72_000000000-C3HGL_1_1105_9370_20961	M01634_72_000000000-C3HGL_1_1105_9370_20961	TGCAGAATCCCATGAACCATCCAGTCTTTGAACGCA-AGTTGCG-------------CCCCAAGCC-TTCTGGCCGAGGGCACGTCTGCCTGGGTGTC---ACAAAT----CGTCG--------T-----------CA---------------------CC---C------CATC--CTCT-----C-----------------------GAG---GTT----------------A-TGGGATG----GAAGCTGATC-TCCTGTGTG----T---TACCG-CACGCGGTTGGCCAAAAT----CCGAGCTA-AGGACG-CCAGGAGCG--TCTT-GACATGCGG----TGGTG------------------AA----------------TTTA-----…
802	>M01634_72_000000000-C3HGL_1_1105_9937_3939	M01634_72_000000000-C3HGL_1_1105_9937_3939	TGCAGAATCCCGTGAACCATCGAGTCTTTGAACGCA-AGTTGCA-------------CCCCAAGCC-TTCTAGCCGAGGGCACGTCTGCTTGGGTGTC---ACATAT----CGAAG--------------------CC---------------------CT----------TCCCCAAATT-----------------------------AAACTTGGT---------------GTGCAGGGTG----AATGATGGCT-TCCCGTGAG-----CCATTTGGTCTCATGGTTGGCTGAAAA----TTGAGACC-TTGGCA---GGGTGTG--CCAT-GATTAATGG----TGGTTGTGTGACGCACGAAGCCCAA-------TCATGATCATTGC-----…
280	>M01634_72_000000000-C3HGL_1_1106_10398_19745	M01634_72_000000000-C3HGL_1_1106_10398_19745	TGCACAATCCCATTAACCATCAAGTCTTTGAACGCA-AGTTGCG-------------CCCCAAGCC-TTCTGCCCGAGGGCACGTCTGCCTGGGTGTC---ACAAAT----CGTTG-----T--------------CC---------------------CC---C------CATC--CTCT-----C-----------------------GAG---GAT----------------A-TGGGACG----GAAGCTGATTTTCTCGTGTG----T---TACTG-CACACGGTTGGCC-AAAT----CTGAGCTA-AGGACG-CCAGGATCC--TCTT-GACATGCAG----TGGTG------------------AA----------------TTCA-----…
94	>M01634_72_000000000-C3HGL_1_1106_11703_13789	M01634_72_000000000-C3HGL_1_1106_11703_13789	TGCAGAATCCCGTGAACCATCGAGTCTTTGAACGCA-AGTTGTG-------------CCCCAAGCC-TTCTGGCCGAGGGCACGTCTGCCTGGGTGTC---ACAAAT----CATCG--------T-----------CC---------------------CC---C------CATC--CTGT-----C-----------------------GAG---GAT----------------A-TGGGACT----GAAGCTGATC-TCCCGTGTG----T---TACCG-CACGCGGTTGGCCAAAAT----CCAAGCTA-AGGACA-CCAGGAGCG--TCTT-GACATGCGG----TGGTG------------------AA----------------TTCA-----…
476	>M01634_72_000000000-C3HGL_1_1106_13187_17061	M01634_72_000000000-C3HGL_1_1106_13187_17061	TGTAAAATCCCATGAATCACCGAGTCCTTGAACATA-AGTTGTG-------------CCCAAAGCA-TTTAGGCTGAGGGTACGTCTATCGAGGTGTC---ACATAT--CCCGTCG-----CAC------------CC---------------------CC---A---ACCCATCCCAACT-----C-----------------------GGGCATGTT-----------GGCTGGTGGGAGCA----GATATTAGCC-TCCCGTGTA--------CTCGC-GTTGTGGTTAGTCTAAAA----TCAAGCCC-CGAGTG---ATGAATG--TCAG-GATAAGTGG----TGGTC------------TGTAATAG------------CTATTTCG-----…
511	>M01634_72_000000000-C3HGL_1_1106_13431_21248	M01634_72_000000000-C3HGL_1_1106_13431_21248	TGTAGAATCCCGTGAATCACCGAGTCTTTGAACGCA-ATTTGTG-------------CCCAAAGCC-TTTAGGCTAAGGGCACGTCTTCCTGGGCATC---ACGTAT--CCCGTCA-----CA-------------CC---------------------CC---A---ACCCATCCCAACT-----T-----------------------GGGCATGAT-----------GGCTGGTGGGAGCG----AATATTGGCC-TCCCGTGTA--------CTCGC-GTTATGGTTGGTCTAAAA----TCGAGCTC-CGGGCG---ACGAACG--TCAC-GACAAGTGG----TGGTC------------TGTAATAG------------CTATTTCG-----…
285	>M01634_72_000000000-C3HGL_1_1106_13907_16948	M01634_72_000000000-C3HGL_1_1106_13907_16948	GGCAGAATCCCGTGAACCATCGAGTCTTTGAACGCA-AGTTGCG-------------CCCGAAGTC-ATTAGGTTGAGGGCACGTCTGCTTGGGTGTT---GCACAT----CGTTG--------------------CC---------------------CA---T---GTGCCTTAGCCAC-----GTGCC-------------------AGA---CAC-----------CA--AG-CAGGGCG----AATGTTGGCT-TCCCGCGAG----C---AATGT-CTCACGGTTGGTTGAAAA----CTGAGTCC-GCGGTG---GAGGGCG--CCGT-GATGGATGG----TGGCTGAGTTAAAGCTCGAGACCGA-----------------TCG-----…
424	>M01634_72_000000000-C3HGL_1_1106_13985_7878	M01634_72_000000000-C3HGL_1_1106_13985_7878	TGCAGAATTCAGTGAATCATCGAATCTTTGAACGCA-CATTGCG-------------CCCTTTGGTATTC---CAAAGGGCATGCCTGTTCGAGCGTC---ATTTGTA-----------------------------C---------------------CC---TC---AAGCTTTGCTT------------------------------------GGT-----------------GTTGGGCG-----TCTTTTGTC-TCCAGTTCG--------------CTGGAGACTCGCCTTAAA--------GTCA-TTGGCA------GCCGGCCTAC--------------TGGTT---------------------------------------------…
74	>M01634_72_000000000-C3HGL_1_1106_14267_17567	M01634_72_000000000-C3HGL_1_1106_14267_17567	TGCAGAATCCAGTGAACCATCGAGTCTTTGAACGCA-AGTTGCA-------------CCCCAAGCC-TTCTGGCCGAGGGCACGTCTGCCTGGGTGTC---ACAAAT----CGTCG-------TC-----------CC---------------------CC---C------CATC--CTCT-----T-----------------------GAG---GAT----------------A-TGGGACG----GAAGCTGATC-TCCCGTGTG----T---TACCG-CACGTGGTTGGCCAAAAT----CCGAGCTA-AGGACG-CCAGGAGCG--TCTT-GACATGCGG----TGGTG------------------AA----------------TTCA-----…
339	>M01634_72_000000000-C3HGL_1_1106_14769_19634	M01634_72_000000000-C3HGL_1_1106_14769_19634	TGCAGAATCCCGTGAACCATCGAGTCTTTGAACGCA-AGTTGCG-------------CCCCAAGCC-TTCTGGCCGAGGGCACGTCTGCCTGGGTGTC---ACAAAT----CGTCG-------------------TCC---------------------CC---C------CATC--CTCT-----C-----------------------GAG---GAT----------------A-TGGGACG----GAAGCTGATC-TCCCGTGTG----T---TACCG-CACGCGGTTGGCCAAAAT----CCAAGCTA-AGGACGCCCATGAGCA--TCTT-GATCTGCGG----TGGTT------------------AA----------------TTCA-----…
115	>M01634_72_000000000-C3HGL_1_1106_15951_12255	M01634_72_000000000-C3HGL_1_1106_15951_12255	TGCAGAATCCCGTGAACCATCGAGTCTTTGAACGCA-AGTTGCG-------------CCCCAAGCC-TTCTGGCCGAGCGCACATCTGCCTGGGTGTC---ACAAAT----CGTCA-------T-C----------CC---------------------CC---C------CATC--GTCT-----C-----------------------GAG---GAT----------------A-TGGGACG----GAAGCTGATC-TCCCATGTG----T---TACCG-CACGCGGTTGGCCAAAAT----CCAAGCTA-AGGACG-CCAGGAGCG--TCTT-GACATGCGG----TGGTG------------------AA----------------TTCA-----…
47	>M01634_72_000000000-C3HGL_1_1106_18065_2167	M01634_72_000000000-C3HGL_1_1106_18065_2167	TGCAGAATCCCGTGAACCATCGAGTCTTTGAACGCA-AGTTGCG-------------CCCGATGCC-ATTAGGTTGAGGGCACGTCTGCCTGGGTGTC---ACATAT----CGAAG--------------------CC---------------------CT----------TCCCCAAATT-----------------------------AAACTTGGT---------------GTGCAGGGTG----AATGATGGCT-TCCCGTGAG-----CCATTTGGTCTCATGGTTGGCTGAAAA----TTGAGACC-TTGGCA---GGGTGTGC-CCAA-TCATGATCA---TTGCTCTGTCGAATTAGGCCTCTCTTA------CCCATATGCGTAA-----…
420	>M01634_72_000000000-C3HGL_1_1106_18623_25605	M01634_72_000000000-C3HGL_1_1106_18623_25605	TGCAGAATCCCGTTAACCATCGAGTCTTTGAATGCA-AGTTGCG-------------CCCGAAGCC-ATTAGGCCGAGGGCACGCCTGCCTGGGTGTT---CCACAT----CGTTG--------------------CC---------------------CC---C---GTGCCTTGGCCAC-----GTGTC-------------------AGA---CAC-----------CA--AG-CGGGGTG----AATGTTGGCT-TCCCGCGAG----C---AATGT-CTCACGGTTGGTTGAAAA----CTGAGTCC-GCGGTG---GAGGGCG--TCGT-GATGGATGG----TGAATTTGTTAAAGCTCGAGACCAA-----------------TCG-----…
171	>M01634_72_000000000-C3HGL_1_1106_19166_7187	M01634_72_000000000-C3HGL_1_1106_19166_7187	TGCAGAATCCCGTGAACCATCGAGTCTTTGAACGCA-AGTTGCG-------------CCCCAAGCC-TTCTGGCCGAGGGCACGTCTGCCTGGGTGCC---ACAAAT----CGTCG--------T-----------CC---------------------CC---C------CATC--CTCT-----C-----------------------GAG---GAT----------------A-TCGGACG----GAAGCTGGTC-TCCCGTGTG----T---TACCG-CACGCGGTTGGCCAAAAT----CCAAGCTA-AGGACG-TCAGTAGCG--TCTT-GACATGCGG----TGGTG------------------AA----------------TTTA-----…
292	>M01634_72_000000000-C3HGL_1_1106_19402_3723	M01634_72_000000000-C3HGL_1_1106_19402_3723	TGCAGAATCCTGTGAACCATCGAGTCTTTGAACGCA-AGTTGCG-------------CCCGAAGCC-ATTAGGCTGAGGGCACGCCTGCCTGGGTGTT---GCACAT----CG-T------------------------------------------------------TGCC----CC-C-----GTGCC-------------------AGG---CAC-----------CA--AG-CGGGGCG----AATGTTGGCT-TTCTGCGAG----C---AATGT-CTTACGGTTGGTTGAAAA----CTGAGTCC-GCGGTG---GAGGGTG--TCGT-GATGGATGG----TGGCTGAGTTAAAGCTCGAGACCGA-----------------TCA-----…
279	>M01634_72_000000000-C3HGL_1_1106_19430_2167	M01634_72_000000000-C3HGL_1_1106_19430_2167	TGCAGAATCCCGTGAACCATCGAGTCTTTGAACGCA-AGTTGCG-------------CCTGAAGCC-ATTAGGTTGAAGGCACGTCTGCCTGGGCGTC---ACGCAT--TGCGTCA--------------------CC---------------------CA---C------------CTCC-----CCCGCGCCCCAAGTGGGCACGTCGGTG---TGT--------------------GGGCG----GATATTGGCC-CCCCGTGTG----C---ATCCG-TGCTCGGTCGGCCTAAAA---AACGGGTCC-CCAATG---ACGGACA--TCAC-GACAAGTGG----TGGTTG---------------CTAA------------ACCGTCGC-----…
436	>M01634_72_000000000-C3HGL_1_1106_20569_24504	M01634_72_000000000-C3HGL_1_1106_20569_24504	TGTAGAATCCCGTGAACCATTGAGTCTTTGAACGCA-AGTTGCG-------------CCCCAAGCC-TTCTGGCCGAGGGTACGTCTTCCTGAGTATC---ACAAAT----CATCG--------T-----------CC---------------------CC---C------CATC--CTCT-----T-----------------------GAG---GAT----------------A-TGGGACG----GAAGCTGATC-TCCCGTGTG----T---TACCG-CATGCGGTTGGCCAAAAT----CTGAGCTA-AGGACC-CCAGGAGCG--TCTT-GACATGCGC----TGGTG------------------TA----------------TTCA-----…
146	>M01634_72_000000000-C3HGL_1_1106_20965_15846	M01634_72_000000000-C3HGL_1_1106_20965_15846	TGCAGAATCCCGTGAACCATCGAGTTTGTGAACGCA-AGTTGCA-------------CCCCAAGCC-TTCTGGCCGAGGGCAAGTCTGCCTGGGTGTC---ACAAAT----CGTCG--------T-----------GC---------------------CA---C------CATC--CTCT-----C-----------------------GAG---GAT----------------A-TGGGACG----GAAGCTGATC-TCCCATGTG----T---TACCG-CACGCGGTTGGACAAAAT----CCGAGCTA-AGGACG-CCAGGAGCG--TCTT-GAGCGGCGG----TGGTG------------------AA----------------TTCA-----…
669	>M01634_72_000000000-C3HGL_1_1106_21164_22813	M01634_72_000000000-C3HGL_1_1106_21164_22813	TGCAGAATCCCGTGAACCATCGAGTCTTTGAACGCA-AGTTGCG-------------CCCCAAGCC-TTCTGGCCGAGGGCACGTGTGCCTGGGTGTC---ACAAAT----CATCG-------------------T---------------------------------------------------------------------------------------------------------------------------------GTG----T---TACAG-CACGCGGTTGGCCAAAAT----CCGAGCTA-AGGACG-CCAGGAGCT--TTCT-TACATGCGG----TGGTG------------------AA----------------TTCA-----…
36	>M01634_72_000000000-C3HGL_1_1106_21457_23153	M01634_72_000000000-C3HGL_1_1106_21457_23153	TGCAGAATCCCGTGAACCATCGAGTTTTTGAACGCA-AGTTGCG-------------CCCGAGACC-TTTAGGTTGAGGGCACGTCTGGCTGGGCGTC---ACACAC--AGCGTTG--------------------CT---------------------CCACAC------CAACCTAGTT-----------------------------------GGT----------------A-GAGAGCG----GATATTGGCC-CCCCGAGTC--------CTTTG-GGCACGGTCGGCACAAAT----ATTGGTCA-CCGGCA---GCGAGTG--TCGC-GGTCAGCGG----TGGTTGTATTTCCTCCAAAGACAAAA--------TAACGCGTTC------…
617	>M01634_72_000000000-C3HGL_1_1106_21852_11808	M01634_72_000000000-C3HGL_1_1106_21852_11808	GGCAGAATCCCGTGAACCATCGAGTCTTTGAACGCA-AGTTGCG-------------CCCCAAGCC-TTCTGGCAAAGGGCACGTCTGCCTGGGTGTC---ACAAAC----CGTCG-------T-C----------CC---------------------TC---T------CATC--CT-T-----C-----------------------TCG---GAT----------------A-TGGGACG----GAAGCTGGTC-TCCCGTGTG----T---TACCG-CACGCGGTTGGCCAAAAT----CCGAGCTA-AGGGCG-CCTAGAGCA--TCAC-GACATGCGG----TGGTG------------------AA----------------CTAA-----…
484	>M01634_72_000000000-C3HGL_1_1106_24806_19611	M01634_72_000000000-C3HGL_1_1106_24806_19611	TGCAGAATCCCATGAATCACCGAGTCATTGAACGCA-AGTTTTG-------------CCCAAAGCC-TTTAGGCTGAGGGCATGTCTTCCTGGGCATC---ACGTAT--CATGTCG-----CTC------------CC---------------------CC---A---ACCCGTCCCAACT-----C-----------------------GGGCATGAT-----------GGCTGGTGGGTGCA----GATATTGGCC-TCCCATGTA--------CTTGC-ATTATAGTTGGTCTACAA----TCGAGCCC-CGAGCG---ATGAACA--TCAC-GATAAGTGG----TGGTC------------TGTAATAG------------CTATTTCA-----…
123	>M01634_72_000000000-C3HGL_1_1106_25008_17110	M01634_72_000000000-C3HGL_1_1106_25008_17110	TGTAGAATCCCGTGAACCATTGAGTCTTTGAACGCA-AGTTGCG-------------CCCCAAGCC-TTCTGGCCGAGGGCACGTCTGCCTGAGTATC---ACAAAT----CATCG--------TC----------CC---------------------CC---C------CATC--CTCT-----T-----------------------GAG---GAT----------------A-TGGGACG----GAAGCTGATT-TCCCGTGTG----T---TACCG-CATGCGGTTGGCCAAAAT----TTAAGCTA-AGGACG-CCAGGAGCG--TCTT-GACATGCGC----TGGTG------------------AC----------------TTCA-----…
27	>M01634_72_000000000-C3HGL_1_1106_25828_18992	M01634_72_000000000-C3HGL_1_1106_25828_18992	TGCAGAATCCCGTGAACCATCGAGTCTTTGAACGCA-AGTTGCG-------------CCCGAAGCC-TTCTGGCCGAGGGCACGCCTGCCTGGGCGTC---ACGCAT--CGCGTCG--------------------CC---------------------CC---C---CTCCAACGTCCCT-----------------------------AGG---GAC----------TCGCGAGAGGGAGCG----GAAAATGGTC-TCCCGTGTG--CCT---TCTGG-CCCGCGGCTGGCCTAAAT----GAGATCCT-GCATCG---ACGGATG--TCAC-GACCAGTGG----TGGTTGAA---------------AA----------------CTCA-----…
107	>M01634_72_000000000-C3HGL_1_1106_26293_17041	M01634_72_000000000-C3HGL_1_1106_26293_17041	TGCAGAATCCCGTGAACCATCGAGTCTTTGAACGCA-AGTTGCG-------------CCCTAAGCC-TTCTAGCCGAGGGCACG---------------------------------------------------TCC---------------------CC---C------CATT--CTCT-----C-----------------------GAG---GAT----------------A-TGGGACG----GAAGCTGATC-TCCCGTGTG----T---TACCG-CATGCGGTTGGCCAAAAT----CCGAGCTA-AGGACG-TCAGGAGCG--TCTT-GACATGCGG----TGGTG------------------AA----------------TTTA-----…
322	>M01634_72_000000000-C3HGL_1_1106_26462_19165	M01634_72_000000000-C3HGL_1_1106_26462_19165	TG-------------CAGAATCCC-GTGAACCATCGAGTCTTTGAACGCAAGTTGC---GCCCCA----AGCCT-------T------------CT---------------------GG---C------CGAG--GGCA-----C-----------------------GTC---TGC----------------C-TGGG-TG----TCA-CAAATC--GTCGTGTG----T---TACCG-CACGCGGTTGGCCAAAAT----CCGAGCTA-AGGGCG-CCTAGAGCG--TCAC-GACATGCGG----TGGTG------------------AA----------------CTAA--------------------AGC-----------------CTCT---…
411	>M01634_72_000000000-C3HGL_1_1106_26901_9804	M01634_72_000000000-C3HGL_1_1106_26901_9804	TGCAGATTCCCGTGAACCATCGAGTCTTTGAACGCA-AGATGCG-------------CCCCAAGCC-TTCTGGCCGAGGGCACGTCTGCCTGGGTGTC---ACAAAT----CGTCG--------T-----------CC---------------------CC---C------CATC--CTCT-----C-----------------------GAG---GAT----------------A-TGGGACG----GAAGCTGATC-TCCCGTGTG----T---TACCG-CACGTGGTTGGCCAAAAT----TCGAGCTA-AGGATG-CCAGGAGCG--TCTT-GACATGCAG----TGGTG------------------AA----------------TTCA-----…
623	>M01634_72_000000000-C3HGL_1_1106_27757_16579	M01634_72_000000000-C3HGL_1_1106_27757_16579	TGCAGAATCC-CGTGAAC-------------CACCAAGCC-TTCTGGCCGAGGGCACGTCTGCCTGGGTGTC---ACAAAC----CGTCG-------T-C----------CC---------------------TC---T------CATC--CT-T-----C-----------------------TCG---GAT----------------A-TGGGACG----GAAACTGGTC-TCCCGTGTG----T---TACCG-CACGCGGTTGGCCAAAAT----CCGAGCTA-AGGGCG-CCTAGAGCG--TCAC-GACATGCGG----TGGTG------------------AA----------------CTAA--------------------AGC--------…
154	>M01634_72_000000000-C3HGL_1_1106_28072_12922	M01634_72_000000000-C3HGL_1_1106_28072_12922	TGTAGAATCACGTGAACCAGCAAGTCTTTGAACGCA-AGTTGCA-------------CCCCAAGCC-TTCTGGCCGAGGGCACGTCTGCCTGGGTGTC---ACAAAT----ATTCG--------T-----------CC---------------------CC---C------CATC--CTCT-----C-----------------------GAG---GAT----------------A-TGGGACG----GAAGCTTATC-TCTTGTGTG----T---TACCG-CACGTGAATGGCCAAAAT----CCGAGCTA-AGGATG-CCAAGAGCG--TCTT-GACATGCAG----TGGTG------------------AA----------------TTCA-----…
331	>M01634_72_000000000-C3HGL_1_1106_3661_11816	M01634_72_000000000-C3HGL_1_1106_3661_11816	TGCAGAATCCCGTGAACCATCGAGTCTTTGAACGAA-AGTTGCG-------------CCCCAAGCC-TTCTGGCCGAGGGCACGTCTGCCTGGGTGTC---ACAAAT----CGTCG-------T------------CC---------------------CC---C------CATC--CTCT-----C-----------------------AAG---GAT----------------A-TGGGACG----GAAGCTGATC-TCCCGTGTG----T---TACCG-CACGCGGTTGGCCAAAAT----CTGAGCTA-AGGACA-TCAGAAGCG--TCTT-GACATGCGG----TGGTG------------------AA----------------TTCA-----…
489	>M01634_72_000000000-C3HGL_1_1106_4369_9732	M01634_72_000000000-C3HGL_1_1106_4369_9732	TGCAGAATCCTGTGAATCAATGAGTCTTTGAACGCA-AGTTGCG-------------CCCAAAGCC-TTTAGGCTGAGGGCACGTCTGCCTGGGCGTC---ACGTAT--CCCATCG-----TA-------------CC---------------------CC---A---ACCCGTCCTAACT-----T-----------------------GGGCATGAT-----------GGCTGGTGAGAGCG----GATATTGGCC-TCCCGTTTA--------CTCGC-GTTACGGTTGGTCTAAAA----TCAAGCCC-CGAGCA---ATGAACG--TCAC-GATAAGTGG----TGGTC------------TGTAATAG------------CTATTTCG-----…
75	>M01634_72_000000000-C3HGL_1_1106_4506_23192	M01634_72_000000000-C3HGL_1_1106_4506_23192	TGCAGAATCCCGTGAACCATCGAGTCTTTGAACGCA-AGATGCG-------------CTCCAAGCC-TTCTGGCCGAGGGCACGTCTGCCTGGGTGTC---ACAAAT----CGTCA-------T------------CC---------------------CC---C------CATC--CTCT-----C-----------------------GAG---GAT----------------A-TGGGACG----GAAGCTGATC-TCCCGTGTG----T---TACCG-CATGC-----------------------------------AGGAGCG--TCTT-GACATGTGG----TGGTG------------------AA----------------TTCA-----…
48	>M01634_72_000000000-C3HGL_1_1106_5164_10720	M01634_72_000000000-C3HGL_1_1106_5164_10720	TGCAGAATCCCGTGAACCATCGAGTCTTTGAACGCA-AGTTGCG-------------CCCCAACCC-TTCTAGCCGAGGGCACGTCTGCCTGGGTGTC---ACAAAT----CTTCA--------T-----------CC---------------------CC---C------CATC--CTCT-----C-----------------------GAG---GAT----------------A-GGGGACG----GAAGCTGATC-TCCTGTGTG----T---TACCG-CACGTGGTTGGCAAATAT----CTGAGCTA-AGGATG-CCAGGAGCA--TCTT-GACATGCGG----TGGTG------------------AA----------------TTCA-----…
788	>M01634_72_000000000-C3HGL_1_1106_5891_12965	M01634_72_000000000-C3HGL_1_1106_5891_12965	TGCAGGATCCCGTGAACCATCTAGTCTTTGAACGCA-AGTTGCG-------------CCCCAAGCC-TTCTGGCCGAGGGCACGTCTGCCTGGGTGTC---ACAAAT----CGTCG-----------------T--CC---------------------CC---C------CATC--CTCT-----C-----------------------GAG---GAT----------------A-TGGGCCG----GAATCTGATC-TCCCGTGTG----T---TACCG-CACGCGGTTGGCCAAAAT----CCAAGCTA-AGGACG-TCAGAAGCG--TCTT-GACATGCGG----TGGTG------------------AA----------------TTTA-----…
462	>M01634_72_000000000-C3HGL_1_1106_6413_15390	M01634_72_000000000-C3HGL_1_1106_6413_15390	TGTAGAATCCCGTGAATCACTGAGTCTTTGAACGCA-AGTTGTG-------------CCCAAAGCC-TTTAGGCTGAGGGCACGTCTGCCTGGGCATC---ACATAT--CTCGTCG-----CAC------------CC---------------------CC---A---ACCCGTTCCAACT-----C-----------------------GGGCATGAT-----------GGCTGGTGGGAGCG----GATATTGGCC-TCCCGTGTA--------CTCGC-ATTATGGTTGGTTTAAAA----TTGAGCCC-CGAGCG---ACGAACG--TCAT-GACAAATGG----TGGTC------------TGTAATAG------------CTATTTCA-----…
253	>M01634_72_000000000-C3HGL_1_1106_6776_18255	M01634_72_000000000-C3HGL_1_1106_6776_18255	TGCAGAATCCCATGAACCATCGAGTCTTTGAACGCA-AGTTGCG-------------CCCCAAGCC-TTCTGGCCGAGGGCACGTCTGCCTGGGTGTC---ACAAAT----CATCG-------------------TCC---------------------CC---C------CATC--CTCT-----C-----------------------GAG---GAT----------------A-TGGGACG----GAAGCTGATC-TCCCGTGTG----T---TACCG-CACACGGTTGGCCAAAAT----CCGAGCTA-AGGACG-TTAGAAGAG--TCTT-GACATGCGG----TGGTG------------------AA----------------TTTA-----…
605	>M01634_72_000000000-C3HGL_1_1106_7049_23761	M01634_72_000000000-C3HGL_1_1106_7049_23761	TGCAGAATCCCGTGAACCATCGAGTCTTTGAACGCA-AGTTGCG-------------CCCGATGCC-ATTAGGTTGAGGGCACGTCTGCCTGGGTGTC---ACATAT----CGAAG--------------------CC---------------------CT-------------TCCCCAA-----ATTAA--ACTTGGT-----------------GT----------------G-CAGGGTG----AATGATGGCT-TCCCGTGAG----CCATTTGCT-CTCATGGTTGGCTGAAAA----TTGAGACC-TTGGTA---GGGTGTG--CCAT-GATAGGTGG----TGGCTGTG-TTACGCACGAGACCAA------------GTAAGTCA-----…
226	>M01634_72_000000000-C3HGL_1_1106_7783_13427	M01634_72_000000000-C3HGL_1_1106_7783_13427	TG-------------CAGAATCCC-GTGAACCATCGAGTCTTTGAACGCAAGTTGC---GCCCCA----AGCCT-------------------TCT---------------------GG---C------CGAG--GGCA-----C-----------------------GTC---TGC----------------C-TGGG-TG----TCA-CAAATC--GTCGTGTG----T---TACCG-CACGTGGTTGGCCAAAAT----CCGAGCTA-AGGACG-CCAGGAGCG--TTCT-TACTTGCGG----TGGTG------------------AA----------------TTCA--------------------ATT-----------------CTCG---…
141	>M01634_72_000000000-C3HGL_1_1107_11196_15309	M01634_72_000000000-C3HGL_1_1107_11196_15309	TGTACAATCCCGTGAACCATTGAGTCTTTGAACGCA-AGTTGCG-------------CCCCAAGCC-TTCTGGCCGAGGGCACGTCTGCCTGAGTATC---ACAAAT----CATCG--------T-----------CC---------------------CC---C------CATC--CTCT-----T-----------------------GAG---GAT----------------A-TGGGATG----GAAGCTGATC-TCCCGTGTG----T---TACCG-CATGCGGTTGGCCAAAAT----CTGAGCT---------CCAGGAGCG--TCTT-GACATGCGC----TGGTG------------------AA----------------TTCA-----…
698	>M01634_72_000000000-C3HGL_1_1107_11418_22043	M01634_72_000000000-C3HGL_1_1107_11418_22043	TGCAGAATCCCGTGAACCATCGAGTCTTTGAACGCA-AGTTGCG-------------CCCCAAGCC-TTCTGGCCGAGGGCACGTCTGCCTGGGTGTC---ACAAAT----CGTCA-------------------CCC---------------------CC---C------CATC--CTCT-----C-----------------------GAG---GAT----------------A-TGGGACG----GAAGCTGATC-TCCCGTGTG----T---TACCG-CACGCGGTTGGCCAAAAT----CCGAGCTA-AGGACG-TCAGTAGCG--TCTT-GACATGCGG----TGGTG------------------AA----------------TTTA-----…
222	>M01634_72_000000000-C3HGL_1_1107_11861_17604	M01634_72_000000000-C3HGL_1_1107_11861_17604	TGCAGAATCCCGTGAACCATCGAGTCTTTGAACGCA-AGTTGCA-------------CCCCAAGCC-TTCTGGCCGAGGGCACGTGTGCCTGGGTGTC---ACAAAT----CGTCG-------------------T---------------------------------------------------------------------------------------------------------------------------------GTG----T---TACCG-CACGCGGTTGGCCAAAAT----CCGAGCTA-AGGACG-TCAGGAGCG--TCTT-GACATGCGG----TGGTG------------------AA----------------TTTA-----…
713	>M01634_72_000000000-C3HGL_1_1107_12637_27239	M01634_72_000000000-C3HGL_1_1107_12637_27239	TGCAGAATCCCGTGAACCATCGAGTCTTTGAACGCA-AGTTGCG-------------CCCCAAGCC-TTCTGGCCGAGGGCACGTCTGCCTGGGTGTC---ACAAAT----CGTCG--------------------TC---------------------CC---C---C--CATC--CTCT-----C-----------------------GAG---GAT----------------A-TCGGACG----GAAGCTGGTC-TCCCGTGTG----T---TACCG-CACGCGGTTGATCGAAAT----CCGAGCCA-AGGATG-CCTTGAGCG--TCCC-GACATGCGG----TGGTG------------------AA------------CTCGTTCA-----…
295	>M01634_72_000000000-C3HGL_1_1107_12905_7834	M01634_72_000000000-C3HGL_1_1107_12905_7834	TGTAGAATCCCGTGAACCATCG-A-GTCTTTG-------------AACGCA-AG-TTGCACCCGAGGGCACGCCTGCCTAGGTGTT---GGACAT----CGTTG--------------------CC---------------------CC---C---GTGCCTTGGCCAC-----GTGCC-------------------AGG---CAC-----------CA--AG-CGGGGCG----TATGTTGGCT-TCCCGCGAG----C---AATGT-CTCACGGTTGGTTGAAAA----CTGAGTCC-GCGGTG---GAGGGCG--CCGT-GATGGATGG----TGGCTGAGTTAAAGCTCGAGACCGA-----------------TCG------------TGCGT…
204	>M01634_72_000000000-C3HGL_1_1107_13744_23683	M01634_72_000000000-C3HGL_1_1107_13744_23683	TGCAGAATCCCGTGAACCATCGAGTCTTTGAACGCA-AGTTGCG-------------CCCGAGGCC-TCCTGGTCGAGGGCACGTCTGCCTGGGTGTC---ACGCAT----CGTCG--------------------CC---------------------CC---C------GCTCCCCTCGGCTCAC-----------------------GAG---GGC------------------GGGGGCG----GATACTGGTC-TCCCGCGCG----C---TCCCG-CCCGTGGTTGGCCTAAAA----TCGAGTCC-CCGGCG---ACGGTCG--CCAC-GACAAGCGG----TGG-T---------------------------------------------…
435	>M01634_72_000000000-C3HGL_1_1107_14237_22360	M01634_72_000000000-C3HGL_1_1107_14237_22360	TGCAGAATCCCGTGAACCATCGAGTCTTTGAACGCA-AGTTGCG-------------CCCCAAGCC-TTCTGGCCGAGGGCACGTCTGCCTGGGTGTC---ACAAAT----CTTCA-------T------------CC---------------------CC---C------CATC--CTCT-----C-----------------------GAG---GAT----------------A-GGGGACG----GAAGCTGATC-TCCCGTGTG----T---TACCG-CACGTGGTTGGCAAAAAT----CCGAGCTA-AGGATG-CCAGGAGCA--TCTT-GACATGTGG----TGGTG------------------AA----------------TTCA-----…
464	>M01634_72_000000000-C3HGL_1_1107_14589_12681	M01634_72_000000000-C3HGL_1_1107_14589_12681	TGTAGAATCCCATGAATCATCGAGTCTTTGAACGTA-AGTTGAG-------------TCCAAAGCA-TTTAGGCTGAGGGCACGTCTTCCTGGGTGCC---ACGTAT--CCCATCG-----CAC------------CC---------------------CT---A---ACCTCTCCCAACT-----C-----------------------GGG---CAT--GATGGC---TG--GT-GGGAGAG----GATATTGGCC-TCTCGTGTA--------CTCGT-GTTATGGTTGGTATAAAA----TCGAGCCC-TGAGCG---ACGAATG--TGGG-AGCTCACAA----AGATC-------------CCAA-AG------------CATCGTTA-----…
481	>M01634_72_000000000-C3HGL_1_1107_14626_24609	M01634_72_000000000-C3HGL_1_1107_14626_24609	TGTAGAATCTCGTGAATCACCAAGTCTTTGAACGCA-AGTTGTG-------------CCCAAAGAC-TTTAGGCTGAGGACACGTATGCCTGGGCGTC---ACGTAT--CCCGTTG-----CAC------------CC---------------------CC---A---ACCCGTCCCAAAT-----C-----------------------GGGCATGAT-----------GGCTAGTGGGAGCG----TATATTGCCC-TCCCATGTA--------CTCGC-GTTACGGTTGGTCTAAAA----TCGAGCCC-CGAGCG---ATGAACG--TCAC-AACAAGTGG----TGGTC------------TGTAATAT------------CTATTTCA-----…
244	>M01634_72_000000000-C3HGL_1_1107_15031_13718	M01634_72_000000000-C3HGL_1_1107_15031_13718	TGTAGAATCCCGTGAACCATCGAGTCTTTGAAAGCA-AGTTGCG-------------CCCCAAGCC-TTCTGGCCGAGGGCACGTCTGCATGGGTGTC---ACAAAT----GGTCA--------T-----------CC---------------------CC---C------CATC--CTCT-----C-----------------------GAG---GAT----------------A-TGGAACG----GAAGCTGATC-TCCCCTGTG----T---TACCG-CATGCGGTTGGCCAAAAT----CCGAGCTA-AGGACG-CCAGGAGCG--TCTT-GACATGCGG----TGGTG------------------AA----------------TTCA-----…
463	>M01634_72_000000000-C3HGL_1_1107_15292_12079	M01634_72_000000000-C3HGL_1_1107_15292_12079	TGTAGAATCCCGTGAATCACCGAGTCTTTGAACGCA-AGTTGTG-------------CCCAAAGCC-TTTAGGTTGAGGGTACGTCTGCCTTGGTGTC---ATGTAT--CCCGTTG-----CAC------------CC---------------------CC---A---ACCCATCCCAACT-----C-----------------------AGGCATGAT-----------GGCTGCTGGGAGCA----GATATTGGTC-TCCCGTGTA--------CTCAC-GTTACGGTTGGTCTAAAA----TTGACCCC-CGAGCG---AGGAACG--TCACGACAAAGACCC---CAAAG------------CATCGTCA------------CGATGATG-----…
338	>M01634_72_000000000-C3HGL_1_1107_15306_13316	M01634_72_000000000-C3HGL_1_1107_15306_13316	TGCAGAATCCCGTGAACCATCGAGTCTTTGAACGCA-AGTTGCG-------------CCTGAAGCC-ATTAGGCCGAAGGCACGTCTGCCTGGGCGTC---ACGCAT-CG-CGTCA--------------------CC---------------------CC---A---TC-C-ACAACTAT-----------------------------------GTT---------------GGATGAGGTG----GATTCTGACC-TCCTGTG----------CCTCTAGGTGTAGTTGGTCGAAAT----TCGAGTCC-GGAGCT---TAGGACC--TCAC-GACAAGTGG----TGGTTGCA---------------AA------------ACAACTCG-----…
71	>M01634_72_000000000-C3HGL_1_1107_15555_21685	M01634_72_000000000-C3HGL_1_1107_15555_21685	TGCATAATCCCGTGAACCATCGAGTATTTGAACGCA-AGTTGCG-------------CCCCAAGCC-TTCTGGCCGAGGGCACGTCTGCCTGGGTGTC---ACAAAT----CGTTG-------------------TCC---------------------CC---C------CATCCTCTCT------------------------------AG---GAT----------------A-TGGGACG----GAAGCTGATC-TCCCGTGTG----T---TACCA-TACGCGGTTGGCCAAAAT----CCGAGCTA-AGGACG-CCAGGAGCG--TCTT-GACATGCAG----TGGTG------------------AA----------------TTCA-----…
763	>M01634_72_000000000-C3HGL_1_1107_16205_25914	M01634_72_000000000-C3HGL_1_1107_16205_25914	TGCAGAATCCCATGAACGCA-AGTTGCG-------------CCCCAAGCC-TTCTCGCCGAGGGCACGTCTGCCAGGGTGTC---ACAAAT----CATCG-------------------TCC---------------------CC---C------CATC--CTCT-----C-----------------------AGG---GAT----------------A-TGGGATG----GAAGCTGATC-TCCCGTGTG----T---TACCG-CACGCGGTTGGCCAAAAT----CCGAGCTA-AGAACG-TCAGGAGCG--TCTT-GACATGCGG----TGGTG------------------AA----------------TTTA--------------------A…
69	>M01634_72_000000000-C3HGL_1_1107_16440_17313	M01634_72_000000000-C3HGL_1_1107_16440_17313	TGCAGAATCCCGTGAACCATCGAGCCTTTGAACGCA-TGTTGAG-------------CCCGAGGCC-TCCTGGTTGAGGGCACATCTGCTTGGGTGTC---ACACAT----CATCG--------------------CC---------------------CC---T------ACTCCCCTCGGCTCAT-----------------------GAG---GGC------------------GGGGGCG----GATACTGGTC-TCCCGCACG----A---TCCCG-CCCATGGTTGGCCTAAAA----TCGAGTCC-TCGACG---ATGGTCT--CCAC-GACAAGCGG----TGGTTGAG---------------AG-------------------------…
395	>M01634_72_000000000-C3HGL_1_1107_16719_15918	M01634_72_000000000-C3HGL_1_1107_16719_15918	TGCAGAATCCCGTGAACCATTGAGTCTTTGAACGCA-AGTTGCG-------------CCCGAAGCC-ACTAGGCTAAGGGCACGTCTGCCTGGGTGTC---ACGCAT-CT-AGTTG--------------------CC---------------------CC---T--------TCTTCTCC-----------------------------GAG---GAG------------A--GA-TGGAGCG----GAGATTGGCC-CCCCGTGC---------TTCCG-AGTGCGGTCGGCCTAAAA----CTTGGCCC-TTGGAG---GCCGGCG--TCAC-GATCCGTGG----TGGTTG------------GCATCAA------------TTGTCTTA-----…
397	>M01634_72_000000000-C3HGL_1_1107_17019_11071	M01634_72_000000000-C3HGL_1_1107_17019_11071	TGCAGAATCCCGTGAACCATCGAGTCTTTGAACGCA-AGTTGCG-------------CCCCAAGCC-TTCTGGCCGAGGGCACGTCTGCCTGGGTGTC---ACAAAT----CGTCG-------T------------CC---------------------CC---C------CATC--CTCT-----C-----------------------GAG---GAT----------------A-TCGGACG----GAAGCTGGTC-TCCCGTGTG----T---TACCG-CACGCGGTTGGCCAAAAT----CCTAGCTA-AGGATG-CCAGGAGCG--TCTT-GACATGCGG----TGGTG------------------AA----------------TTCA-----…
513	>M01634_72_000000000-C3HGL_1_1107_17244_10994	M01634_72_000000000-C3HGL_1_1107_17244_10994	TGCAGAATCTCGTGAATCACCGAGTCTTTGAACGCA-AGTTGCG-------------CCCAAAGCC-TTTAGGCTGAGGGCACGTCTGCCTGGGCGTC---ACGTAT--CCCGTCG-----CAC------------CC---------------------CC---A---ACCCGTCCCAACG-----C-----------------------GGGCACGAT-----------GGCTGGTGGGAGCG----GATATTGGCC-TCCCGTGTA--------CTCGC-GTCACGGTTGGTCTAAAA----TCGAGCCC-CGAGCG---ACGAACG--TCAC-GATAAGTGG----TGGTC------------TGTAATAG------------CTATTTCG-----…
361	>M01634_72_000000000-C3HGL_1_1107_17286_2340	M01634_72_000000000-C3HGL_1_1107_17286_2340	TGCAGAATCCCGTGAACCATCGAGTCTTTGAACGCA-AGTTGCG-------------CCCGAAGCC-ATTAGGCCGAGGGCACGTCTGCCTGGGCGTC---ACACGT----CGTTG-------CCC----------CC---------------------CC----------CAAC-CCCCT-----T-----------------------GGG---AGT-----TG--------GA-TGGGACG----GATGATGGCC-TCCCGTGTG----C---TTAGT-CACGCGGTTGGCATAAAT---ACCAAGTCC-TCGGCG---ACCAACG--CCAC-GACAATCGG----TGGTTG---------------TCAA------------A-CCTCGG-----…
381	>M01634_72_000000000-C3HGL_1_1107_17396_3821	M01634_72_000000000-C3HGL_1_1107_17396_3821	TGCAGAATCCCGTGAACCATCGAGTCTTTGAACGCG-AGTTGCG-------------CCTGATGCC-ATTAGGTTGAGGGCACGTCTGCCTGGGTGTC---ACATAT----CGAAG--------------------CC---------------------TC---C---TGCCAATTTCCCT---------------------------TTGATTATTGT----------------G-CAGGGTG----GATGTTGGCC-TCCCGTGAA--CTC---TTTTTGGTCATGGTTGGTTGAAAA----TTGAGACC-TTGGTA-----GGGTGTGCCAT-GATAAATGG----TGCATGTGTTAAGCACGAGACCAAA-------------------------…
429	>M01634_72_000000000-C3HGL_1_1107_19673_5894	M01634_72_000000000-C3HGL_1_1107_19673_5894	TGCAGAATCCCGTGAACCATCGAGTCTTTGAACGCA-AGTTGCG-------------CCCCAAGCC-TTCTGGCCGAGGGCACGTCTGCCTGGGTGTC---ACAAAT----CGTCG--------T-----------CC---------------------CC---C------CATC--CTCT-----C-----------------------GAG---GAT----------------A-TCGGACG----GAAGCTGGTC-TCCCGTGTG----T---TACCG-CACGCGGTTGGCCAAAAT----CCTAGCTA-AGGATG-CCAGGAGCG--TCTT-GACATGCGG----TGGTG------------------AA----------------TTCA-----…
512	>M01634_72_000000000-C3HGL_1_1107_19962_27003	M01634_72_000000000-C3HGL_1_1107_19962_27003	TACAGAATCCTATGAATCACCGAGTATTTGAACGTA-AGTTGTG-------------CCCAAAGCC-TTTAGGCTGAGGGCACGTCTACCTGGGCGTC---ACGTAT--CCCGTCG-----CAC------------CC---------------------CT---A---ACCCATCCCAACT-----T-----------------------GGGCATGAT-----------GGATGGTGGGAGCG----AATACTGGCC-TCCTGTGTA--------CTCGC-ATTACGGTTGGTCTAAAA----TCAAGCCC-CGAGCG---ACGAACG--TCAT-GATAAGTGG----TGGCC------------TGTAATAG------------CTATTTCA-----…
96	>M01634_72_000000000-C3HGL_1_1107_20439_17046	M01634_72_000000000-C3HGL_1_1107_20439_17046	TGCAGAATCCCGTGAACCATCGAGTCTTTG-ACGCA-AGTTGCG-------------CCCCAAGCG-TTCTGGCTGAGGGCACGTCTGCCTGGGTGTC---ACAAAT----CGTCG--------T-----------CC---------------------CC---C------CATC--CTCT-----C-----------------------GAG---GAT----------------A-TGGAACG----GAAGCTGATC-TCCCGTGTG----T---TACCG-CATGCGGATGGCCAAAAT----CCGAGCTA-AGGACG-CTAGGAGCG--TCTT-GACATGCGG----TGGTG------------------AA----------------TTCA-----…
652	>M01634_72_000000000-C3HGL_1_1107_21419_6362	M01634_72_000000000-C3HGL_1_1107_21419_6362	TGCAGAATCCCGTGAACCATTGAGTCTTTGAACGCA-AGTTGCG-------------CCCGAAGCC-ATTAGGTCGAGGGCACGCCTGCCTAGGCGTC---ACACGC----CGTTG-------CCC----------CT---------------------CC---A------CGCC-TCCTT-----C-----------------------CGG---AGCGTCGGGG--------GG-GGGGGCG----GACAATGGCC-TCCCGTGAG----T---CACCC-CGAGCGGTTGGCACAAAT---ACCGAGTCC-TCGGCG---ACGAATG--CCAA-GATAATCGG----TGGTTG---------------TCAA------------A-CCTCGG-----…
401	>M01634_72_000000000-C3HGL_1_1107_24621_23556	M01634_72_000000000-C3HGL_1_1107_24621_23556	TGCAGAATCCCGTGAACCATCGAGTCTTTGAACGCA-AGTTGCG-------------CCCGATGCC-ATTAGGTTGAGGGCACGTCTGCCTGGGTGTC---ACAAAT----CGTCG--------T-----------CC---------------------CC---C------CATC--CTCT-----C-----------------------GAG---GAT----------------A-TGGGACG----GAAGCTGATC-TCCCGTGTG----T---TACCG-CACGCGGTTGGCCAAAAT----CCGAGCTA-AGGACG-TCAGGAGCG--TCTT-GACATGCGG----TGGTG------------------AA----------------TTTA-----…
22	>M01634_72_000000000-C3HGL_1_1107_25567_8126	M01634_72_000000000-C3HGL_1_1107_25567_8126	TGCAGAATCCCGCGAACCATCGAGTCTTTGAACGCA-AGTTGCG-------------CCCGAGGCC-ACTCGGCCGAGGGCACGCCTGCCTGGGCGTCACGCCAAAACACGC------------------------TC---------------------CC---A------CACCCCTCAT-----T-----------------------GGG---AAT---------------CG-GGATGCG----GCATCTGGTC-CCTCGTCT---------CGCAA-GGGGCGGTGGACCGAAGT----TCGGGCTG-CCGGCGTACCGTGTCA-AACAC-AGCGCGTGG----TGGGCGTCTTTGC----------------------------TTTA-----…
148	>M01634_72_000000000-C3HGL_1_1107_4726_22768	M01634_72_000000000-C3HGL_1_1107_4726_22768	TGCAGAATCCCGTGAACCATCGAGTCTTTGAACGCA-AGTTGCG-------------CCCCAAGCC-TTCTGGCCTAGGGCACGTCTGCCTGGGTGTC---ACAAAT----CATTG-------------------TCC---------------------CC---C------CATC--CTCT-----C-----------------------GAG---GAT----------------A-TGCGACA----GAAGCTGATC-TCCCGTGTG----T---TACCG-CACGCGGTTGGCCAAAAT----CTGAGCTA-AGGACG-TCAGAAGCG--TCTT-GACATGTGG----TGGTG------------------AA----------------TTTA-----…
549	>M01634_72_000000000-C3HGL_1_1107_4876_18725	M01634_72_000000000-C3HGL_1_1107_4876_18725	GCAAGTTGCGCCCCAAGCCTTCTGGCCGAGGGCACG-TCTGCCT-------------GGGTGTCAC-AAATCGTCG-TCCCCCCATCCTC------------------------------------------------------------------------------------------T-----C-----------------------GAG---GAT----------------A-TGGGACG----GAAGCTGATC-TCCCGTGTG----T---TACCG-CACGTGGTTGGCCAAAAT----CCAAGCTA-AGGACA-CCAGGAGCA--TCTT-GACATGCGG----TGGTG------------------AA----------------TTCA-----…
709	>M01634_72_000000000-C3HGL_1_1107_6895_8723	M01634_72_000000000-C3HGL_1_1107_6895_8723	TGCATAATCCCGTGAACCATCGAGTCTTTGAACGCA-AGTTGCG-------------CCCCAAGCC-TTCTGGCCGAGGGCACGTCTGCCTGAGTATC---ACAAAT----CATCG--------T-----------CC---------------------CC---C------CATC--CTCT-----T-----------------------GAG---GAT----------------A-TGGGATG----GAATCTGATC-TCCCGTGTG----T---TACCG-CATGCGGTTGGCCAAAAT----CTGAGCTA-ACGACG-CCAGGAGCG--TCTT-GACATGCGC----TGGTG------------------AA----------------TTCA-----…
323	>M01634_72_000000000-C3HGL_1_1107_7682_22444	M01634_72_000000000-C3HGL_1_1107_7682_22444	TGCAGAATCCCGTGAACCATCGAGTCTTTGAACGCA-AGTTGCG-------------CCCCAAGCC-TTCTGGCCGAGGGCACGTCTGCCTGGGTGTC---ACAAAT----CGTCG-----------------T--CC---------------------CC---C------CATC--CTCT-----C-----------------------GAG---GAT----------------A-TGGGATG----GAAGCTGATC-TCCTGTGTG----T---TACCG-CACGCGGTTGGCCAAAAT----CCAAGCTA-AGGACG-TCAGTAGCG--TCTT-GACATGCGG----TGGTG------------------AA----------------TTTA-----…
189	>M01634_72_000000000-C3HGL_1_1107_8605_10552	M01634_72_000000000-C3HGL_1_1107_8605_10552	TGCAGAATCCCGTGAACCATCGAGTCTTTGAACGCA-AGTTGCG-------------CCCGAAGCC-GTTAGGCCGAGGGCACGTCTGCCTGGGCGTC---ACACGT----CGTTG--------------------CC---------------------CC---C---C--CGAC-CCCTT-----C-----------------------GGG---GGT-----------CG--GA-CGGGACG----GATGATGGCCTTCCCGTGTG-------CCCCGTCACGCGGTTGGCATAAATACCGAGTCCTCGGCGACCGGCGTCGCGGCGATCGGCGTCGCGGCGATCGGTGGTTGT----------------CA------------AACCTCGG-----…
374	>M01634_72_000000000-C3HGL_1_1107_9765_4905	M01634_72_000000000-C3HGL_1_1107_9765_4905	TGCAGAATCCCGTGAACCATCAAGTTTTTTAACGCA-AGTTGGG-------------CTCGAGGCC-TCCTGGTCGATGACACTTCTGCCTGGGTGTC---ACGCAT----CGTCG--------------------CC---------------------CC---C------ACTCTCCTCGGCTCAC-----------------------GAG---GAC------------------GAGGGCG----AATACTGGTC--TCCGCGCG----C---TCCCG-CCCGTAGTTGGCCTAAAA----TTGAGTCC-TTGGTG---ACCGTCG--CCAT-GACAAGCGG----TGGTTGA----------------GA------------GACCCTCG-----…
449	>M01634_72_000000000-C3HGL_1_1107_9864_27434	M01634_72_000000000-C3HGL_1_1107_9864_27434	TGCAGAATCCCGTGAACCATCGAGTCTTTGAACGCA-AGTTGCG-------------CCCGAAGCC-ATCAGGCCGAGGGCACGCCTGCCTGGGCGTC---ACACGC----CGTTG--------------------CC---------------------CC---C---CCGCGCATCCATC-----------------------------GGGAGCGTC----------------G-GGGGGCG----GACGATTGCC-TCCCGTGCG----T---CACCC-CGCGCGGTTGGCACAAAT---GTCGGGTCC-TCGGCG---ACGAACG--CCAC-GACAATCGG----TGGTCGTCG--------------AA---------------CCGCG-----…
499	>M01634_72_000000000-C3HGL_1_1108_10470_5002	M01634_72_000000000-C3HGL_1_1108_10470_5002	TATAGAATCCCGTGAATCACGAAGTCTTTGAATGCA-AGTTGTG-------------CCCAAAGCC-TTTAGGCTGAGGACACGTCTGCCTAGGCATA---ACGTAT--CCCATCG-----CAC------------CC---------------------CC---A---ACCCATTCCAACT-----C-----------------------GGGCATGAT-----------GGCTGGTGGGAGCA----GATATTGGCC-TCCTGTGTA--------CTCGC-GTTATGGTTGGTATAAAT----TTGAGCCC-CGAGAG---ACGAACG--TCAT-GATAAGTGG----TGGTA------------TGTAATAG------------GTATTTCG-----…
318	>M01634_72_000000000-C3HGL_1_1108_10713_21728	M01634_72_000000000-C3HGL_1_1108_10713_21728	TGCAGAATCCCGTGAACCATCGAGTCTTTGAACGCA-AGTTGCG-------------CCCCAAGCC-TTCTGGCCGAGGGCACGTCTGCCTGGGTGTC---ACAAAT----CGTCG-------------------TCC---------------------CC---C------CATC--CTCT-----C-----------------------GAG---GAT----------------A-TGGGACG----GAAGCTGATC-TCCCGTGTG----T---TACCG-CACGCGGTTGGCCAAAAT----CCGAGCTA-AGGACG-TCAGGAGCG--TCTT-GACATGCGG----TGGTG------------------AA----------------TTTA-----…
748	>M01634_72_000000000-C3HGL_1_1108_10970_7510	M01634_72_000000000-C3HGL_1_1108_10970_7510	TGCAGAATCCCGTGAACCATCGAGTCTTTGAACGCA-AGTTGCG-------------CCCCAAGCC-TTCTGGCCGAGGGCACGTCTGCCTGGGTGTC---ACAAAT----ATTTG-------T------------CC---------------------CC---C------CATA--CTCT-----C-----------------------GAG---GAT----------------A-GGGGACG----GAAGCTGATC-TCCCGTGTG----T---TTCCG-CACGCGGTTGGCCAAAAT----CTGAGGTA-AGGACG-CCAGGAGCG--TCTT-GACATGCGG----TGGTG------------------AA----------------TTCA-----…
334	>M01634_72_000000000-C3HGL_1_1108_11045_11631	M01634_72_000000000-C3HGL_1_1108_11045_11631	TGCAGAATCCCGTGAACCATCGAGTCTTTGAACGCA-AGTTGCG-------------CCCGATGCC-ATTAGGTTGAGGGCACGTCTGCCTGGGTGTC---ACATAT----CGAAG--------------------CC---------------------CT-------------TCCCCAA-----ATTAA--ACTTGGT-----------------GT----------------G-CAGGGTG----GATGTTGGCC-TCCCGTGAA----CTCTTTTTG-GTCATGGTTGGTTGAAAA----TTGAGACC-TTGGTA---GGGTGTG--CCAT-GATAGATGG----TGGTTGTG-TGATCCACGAGACCAA-----------------TCA-----…
516	>M01634_72_000000000-C3HGL_1_1108_11861_15802	M01634_72_000000000-C3HGL_1_1108_11861_15802	TACAGAATCCCGTGAATCACCGAGTCTTTGAACGCA-AGTTGCG-------------CCCAAAGCC-TTTAGGCTGAGGGCACGTCTGCCTGGGCGTC---ACGTAT--CCCGTCG-----AAC------------CC---------------------CC---A---ACCCGTCCCAACT-----C-----------------------GGGAATGAT-----------GGCTGGTGGGAACG----GATATTGGCC-TCCCGTGTA--------CTCCC-GTTACGGTTGGTCTAAAA----TCGAGCCC-CGAGCG---ACGAACG--TCAC-GACAAGTGG----TGGTC------------TGTAATAG------------CTATTTCG-----…
73	>M01634_72_000000000-C3HGL_1_1108_12067_10561	M01634_72_000000000-C3HGL_1_1108_12067_10561	GTGAATTGTAGAATCCCGTGAACCATCGAGTCATTGAACGCA-AGTTGCG-------------CCCCAAGCC-TTCTGGCCGAGGGCACGTCTGCCTGGGTGTC---ACAAAT----CGT----------------------CC---------------------CC---C------CATC--CTCT-----C-----------------------GAG---GAT----------------A-TGAGACG----GAAGCTGATC-TCCCGTGTG----T---TATCG-TACGCGGTTGGCCAAAAT----CCGAGCTA-AGGATT-CCATGAGCG--TCTT-GACATGTGG----TGGTG------------------AA----------------TTC…
567	>M01634_72_000000000-C3HGL_1_1108_12208_26547	M01634_72_000000000-C3HGL_1_1108_12208_26547	TGCAGAATCCCGTGAACCATCGAGTCTTTGAACGCA-AGTTGCA-------------CCCCAAGCC-TTCTGGCCGAGGGCACGTCTGCCTGGGTGTC---ACAAAT----CGTCG--------T-----------CC---------------------CT---G------CATC--CTCT-----C-----------------------GAG---GAT----------------A-TGGGACG----GAAGCTGATC-TCCCGTGTG----T---TACCG-CACGCGGTTGGCCAAAAT----CCAAGCTA-AGGACG-TCAGAAGCG--TCTT-GACATGCGG----TGGTG------------------AA----------------TTTA-----…
351	>M01634_72_000000000-C3HGL_1_1108_13597_11003	M01634_72_000000000-C3HGL_1_1108_13597_11003	TGCAGAATCCCGTGAACCATCGAGTCTTTGAACGCA-AGTTGCG-------------CCCCAAGCC-TTCTGGCCGAGGGCACGTCTGCCTGGGTGTC---ACAAAT----CGTCG-------T------------CC---------------------CC---C------CATC--CTCT-----C-----------------------GAG---GAT----------------A-TGGGACG----GAAGCTGATC-TCCCGTGTG----T---TACCG-CACGCGGTTGGCCAAAAT----CCGAGCTA-AGGACG-CCAGGTGCA--TCTT-GACATGCGG----TGGTG------------------AA----------------TTCA-----…
377	>M01634_72_000000000-C3HGL_1_1108_16143_8818	M01634_72_000000000-C3HGL_1_1108_16143_8818	TGCAGAATCCCGTGAACCATCGAGTCTTTGAACGCA-AGTTGCG-------------CCCGAGGCC-TCCTGGTCGAGGGCACGTCTGCCTGGGTGTC---ACGCAT----CGTCG--------------------CC---------------------CC---C------ACTCTCCTCGGCTCAC-----------------------GAG---GAC------------------GGGGGCG----AATACTGGTC-TCCCGCGCG----C---TCCCG-CCCGTAGTTGGCCTAAAA----TTGAGTAC-TTGACG---ACCATCG--CCAC-GACAAGCGG----TGGTTGAG---------------AG-------------------------…
24	>M01634_72_000000000-C3HGL_1_1108_16419_11506	M01634_72_000000000-C3HGL_1_1108_16419_11506	TGCAGAATCCCGTGAACCATCGAGTCTTTGAACGCA-AGTTGCG-------------CCCGAAGCC-GTTAGGCCGAGGGCACGTCTGCCTGGGCGTC---ACACGT----CGTTG--------------------CC---------------------CC---C---CC-CGAC-CCCTT-----C-----------------------CGG---AGT-----------CG--GG-CGGGACG----GATGGTGATC-TCCCGTGCG--------C-CAGTCGCGCGGTTGGCATAAAT---ACCGAGTCC-TCGGCG---ACCGGCG--TCGC-GGCGATCGG----TGGTTGT----------------CA------------AACCTCGG-----…
550	>M01634_72_000000000-C3HGL_1_1108_17142_4609	M01634_72_000000000-C3HGL_1_1108_17142_4609	TGCAGAATCCCGTGAACCATCGAGTCTTTGAACGCA-AGTTGCG-------------CCCGAAGCC-TTCTGGCCGAGGGCACGCCTGCCTGGGCGTC---ACACGC----CGTTG--------------------CC---------------------CC---C------CCGCATCCCTCTCCTC-----------------------GAGAGCGAT-------------CGCGGGGGGACT----GATGATGGCC-TCCCGTGCG--------CTACGCCGCGCGGTTGGCCCAAAT---ACCGAGTCC-CCGGAG---ACGTGCG--CCAC-GACGATCGG----TGGTTGA----------------GA------------GACCTCTG-----…
160	>M01634_72_000000000-C3HGL_1_1108_17251_25456	M01634_72_000000000-C3HGL_1_1108_17251_25456	TGCAGAATCCCGTGAACCATCGAGTCTTTGAACGCA-AGTTGCG-------------CCCCAAGCC-TTCTGGCCGAGGGCACGTCTGCCTGGGTGTC---ACAAAT----CGTCG--------T-----------CC---------------------CC---C------CATC--CTCT-----C-----------------------GAG---GAT----------------A-TGGGACGG----AAGCTGATC-TCCCGTGTG----T---TACCG-CACGCGGTTGGCCAAAAT----CCGAACTA-AGGATG-CCTGGAGCG--TCTT-GACATGCGC----TGGTG------------------AA----------------TTCA-----…
658	>M01634_72_000000000-C3HGL_1_1108_17522_9187	M01634_72_000000000-C3HGL_1_1108_17522_9187	TGCAGAATCCCGTGAACCATCGAGTCTTTGAACGCA-AGTTGCG-------------CCCCAAGCC-TTCTGGCCGAGGGCACGTCTGCCTGGGTGTC---ACAAAT----CGTCG--------T-----------CC---------------------CC---C------CATC--CTCT-----C-----------------------GAG---GAT----------------A-TCGGACG----GAAGCTGGTC-TCCCGTGTG----T---TACCG-CACGCGGTTGGCCAAAAT----CCAAGCTT-AGGACG-CCAGGAGCA--TCTT-GACATGCGG----TGGTG------------------AA----------------TTCA-----…
119	>M01634_72_000000000-C3HGL_1_1108_17860_4492	M01634_72_000000000-C3HGL_1_1108_17860_4492	TGCAGAATCCCGTGAACCATCAAGTCTTTGAACGCA-AGTTGCG-------------CCCCAATCC-TTCTGGCCGAGGGCACGTCTGCTTGGGTGTC---ACAAAT----CGTCG--------------------TC---------------------CC---C------CATC--CTCT-----C-----------------------GAG---GAT----------------A-TGGGACA----GAAGCTGATC-TCCCTTGTG----T---TACCG-TACGCTGTTGGCCAAAAT----CCGAGCTA-AGGACG-CCAGGAGTG--TCTT-GACATGCAG----TGGTG------------------AA----------------TTCA-----…
238	>M01634_72_000000000-C3HGL_1_1108_18086_6938	M01634_72_000000000-C3HGL_1_1108_18086_6938	TGCAGAATCCCGTGAACCATCGAGTCTTTG---AACGCA----AGTTG--------C-----------GC---------------------CC---C------CATC--CTCT-----C-----------------------GAG---GAT----------------A-GGGGACG----GAAGCTGATC-TCCCGTGTG----T---TACCG-CACGTGGTTGGCAAAAAT----CCGAGCTA-AGGATG-CCAGGAGCA--TCTT-GACATGCGG----TGGTG------------------AA----------------TTTA--------------------ATT-----------------CTCG-------TCATAT---AG--TCA---GAC…
496	>M01634_72_000000000-C3HGL_1_1108_18428_22049	M01634_72_000000000-C3HGL_1_1108_18428_22049	TGCAGAATCCCGTGAATCACCGAGTCTTTGAACGCA-AGTTGTG-------------CCCAAAGCC-TTTAGGCTAATGGCACGTCTACCTGGGCATC---ACATAT--TCCGTTT-----CAC------------CC---------------------CC---A---ACCCGTCCCAACT-----C-----------------------GGGAATGAT-----------GGCTGGTGGGAGCG----GATATTGGCC-TCCCGTGTA--------CTCGC-GTTATGGTTGGTCTAAAA----TCGAGCCC-CGAGCG---ATGAAAG--TCAC-GACAAGTGG----TGGTC------------TGTAATAG------------CTATTTCG-----…
143	>M01634_72_000000000-C3HGL_1_1108_20069_20404	M01634_72_000000000-C3HGL_1_1108_20069_20404	TGCAGAATCCCGTGAACCATCAAGTCTTTGAACGCA-AGTTGCG-------------CCCCAATCC-TTCTGGCCGAGGGCACGTCTGCTTGGGTGTC---ACAAAT----CGTCG--------------------TC---------------------CC---C------CATC--CTCT-----C-----------------------GAG---GAT----------------A-TGGGACA----GAAGCTGATC-TCCCGTGTG----T---TACCG-CACGCGGTTGGCCAAAAT----CCGAGCTA-AGGACG-TCAGGAGCG--TCTT-GACATGCGG----TGGTG------------------AA----------------TTTA-----…
29	>M01634_72_000000000-C3HGL_1_1108_21114_3210	M01634_72_000000000-C3HGL_1_1108_21114_3210	TGCAGAATCCCGTGAACCATCGAGTTTTTGAACGCA-AGTTGCG-------------CCCGAAACC-TTTAGGTTGAGGGCACGTCTGCCTGGGCGTC---ACACAC--AGCGTCG--------------------CT---------------------CC---C---CACCAACCTAGTT-----------------------------------GTT----------------G-GAGAGCG----GAGATTGGCC-CCCCGAGTC--------CTTTG-GACACGGTCGGCACAAAT----ATTGGTCC-CCGGCA---GCGAGTG--TCGC-GGTCAGCGG----TGGTTT-----------------AT------------ATCCTCCAAAGAC…
614	>M01634_72_000000000-C3HGL_1_1108_21416_6172	M01634_72_000000000-C3HGL_1_1108_21416_6172	TGCAGAATCCCGTGAACCATCGAGTCTTTGAACGCA-AGTTGCG-------------CCCCAAGCC-TTCAGGCCGAGGGCACGTCTTCCTGGGTGTC---ACAAA-------TCA-------T------------CC---------------------CC---C------CGTC--CTCT-----C-----------------------GAG---GAT----------------A-TGGGACG----GAAGCTGATC-TCCCATGTG----T---TACCG-CACGCGGTTGGCCAAAAT----CCTAGCTA-AGGATG-CCAGGAGCG--TCTT-GACATGCGG----TGGTG------------------AA----------------TTCA-----…
147	>M01634_72_000000000-C3HGL_1_1108_22010_16968	M01634_72_000000000-C3HGL_1_1108_22010_16968	TGCAGAATCCCGTGAACAATAGAGTCTTTGAACGCA-AGTTGCG-------------CCCCAA-CC-TTCTGTCCGAGGGCACGTCTGCCTGGGTGTC---ACAAAT----CGTCG--------------------TC---------------------CC---C------CATC--CTCT-----C-----------------------GAG---GAT----------------A-TGGGACG----GAAGCTGATC-TCCCGTGTG----T---TACCA-CACGCGGTTGGCCAAAAT----CCAAGCTA-AGGACA-TCAGGAGCG--TCTT-GACATGCGG----TGGTG------------------AA----------------TTTA-----…
662	>M01634_72_000000000-C3HGL_1_1108_22372_6547	M01634_72_000000000-C3HGL_1_1108_22372_6547	TGCAGAATCCCGCGAATCATCGAGTCTTTGAACGCA-AGTTGCG-------------CCCGAAGCC-ACCTGGCCGAGGGCACGTCTGCCTGGGTGTC---ACGCAT----CGTTG-----------------CCCCCAA-------------------CC---C------CATCTCCTTGCAAAG----------------------GGACG---AGG-----------GGGCCCGTGGGGCA----GAAATTGGCC-TCCCGTGAG--------CTCATGCATGCGGTTGGCCTAAA----AGCGAGTCC-TCGGCG---ACGCGCG--CCAC-GACAATCGG----TGGTTGTC---------------AA------------ACCCTCGTG----…
582	>M01634_72_000000000-C3HGL_1_1108_23191_10006	M01634_72_000000000-C3HGL_1_1108_23191_10006	TGTAGAATCC-CGTGAAC-------------CATCGAGTC-TTTGAACGCAAGTTGCACCCG-AGGGAACGC---CTGCCT----GGGTG--------------------TT---------------------GC---A---CATCGTTGCCCCC-----GTGCC-------------------AGG---CAC-----------CA--AG-CGGGACG----AATGTTGGCT-TCCCGCAAG----C---AATGT-CTCACGGTTGGTTGAAAG----CTGAGTCC-GCGGTG---GAGGGCG--CCGT-GATGGATGG----TGGCTGAGTTAAAGCTCGAGACCGA-----------------TCG------------TGCGTGTCACC--------…
199	>M01634_72_000000000-C3HGL_1_1108_25144_15337	M01634_72_000000000-C3HGL_1_1108_25144_15337	TGCAGAATCCCGTGAACCATCGAGTCTTTGAACGCA-AGTTGCG-------------CCCGAAGCC-ATTAGGCCGAGGGCACGCCTGCCTGGGCGTC---ACACGT----CGTTG--------------------CC---------------------CC---C-----CCAACCCCCTC-----------------------------GGG---AGT--------------TGGGCGGGACG----GATGATGGCC-TCCCGTGTG--------CTTCGTCATGCGGTTGGCATAAAA---AATAAGTCC-TCGGCG---ACTAACG--CCAC-GACAATCGG----TGGTTGTC---------------AA-------------ACCTCTG-----…
622	>M01634_72_000000000-C3HGL_1_1108_26445_7614	M01634_72_000000000-C3HGL_1_1108_26445_7614	TACAGAATCCCGTGAACCATCGAGTCTTTGAACGCA-AGTTGCG-------------CCCCAAGCC-TTCTGGCCGAGGGCACGTCTGCATGGGTGTC---ACAAAT----TGTTG--------T-----------CC---------------------CC---C------CATC--CTCT-----C-----------------------GAG---GAT----------------A-TCGGACG----GAAGCTGGTC-TCCCGTGTG----T---TACCG-CACGCGGTTGGCCAAAAT----CCGAGCTA-AGGATG-CCAGGAGCG--TCTT-GACATGCGG----TGGTG------------------AA----------------TTTA-----…
162	>M01634_72_000000000-C3HGL_1_1108_26794_16060	M01634_72_000000000-C3HGL_1_1108_26794_16060	TGCAGAATCCCGTGAACCATCGAGTCTTTGAACGCA-AGTTGCA-------------CCCCAAGCC-TTCTGGCCGAGGGCATGTCTGCTTGGGTGTC---CCATGT-----GTTA--------------------CCAGGAAGTTGAATAAATTCACACC---A---AGCCATC--CTCT-----C-----------------------GAG---GAT----------------A-TGGGACG----GAAGCTGATC-TCCCATGTG----T---TACC--CACGCGGTTGACCAAAAG----CCGAGCTA-AGGACG-CCAGGAGCA--TCTT-GACATGCGG----TGGTG------------------AA----------------TTCA-----…
480	>M01634_72_000000000-C3HGL_1_1108_26886_22713	M01634_72_000000000-C3HGL_1_1108_26886_22713	TGTAGAATCCCGTAAATTACCGAGTCTTTGAACGCA-AGTTGCT-------------CCCAAAGCC-TTTAGGCCGAGGCCACGTCTGCCTCGGCATC---ACGTAT--CCCGTTG-----CA-------------CC---------------------CC---A---ACCCGTCCCAACT-----C-----------------------GGGCATGA---------------TGGTGGGAGCG----GATATTGGCC-TCCCGTGTA--------CTTGC-GTTACGGTTGGTCTAAAA----TCGAGCCC-CGAGCG---ACGAACG--TCAC-GACAAGTGG----TGGTC------------TGTAATAT------------CTATTTTG-----…
413	>M01634_72_000000000-C3HGL_1_1108_27744_9003	M01634_72_000000000-C3HGL_1_1108_27744_9003	TGCAGAATCCCGTGAACCATCGAGTCTTTGAACGCA-AGTTGCG-------------CCCGAAGCC-TTCTGGCCGAGGGCACGCCTGCCTGGGCGTC---ACGCAT--CGCGTCG---------------------C---------------------CC---C---CTCCAA-GTCCCT-----------------------------CTG---GAT----------TTGCGAGTGGG-GTG----GAAATTGGCC-TCCCGTGTT--CC----TC-GT-AACGCGGCCGGCCAAAAT----GAGATCCT-GCATCG---ACGGATG--TCGC-GACCAGTGG----TGGTTGAT---------------AA----------------CTCG-----…
251	>M01634_72_000000000-C3HGL_1_1108_27771_10761	M01634_72_000000000-C3HGL_1_1108_27771_10761	CGATACTTGGTGTGAATTGCAGAATCCCGTGAACCATCGAGTCTTTGAACGCA-AGTTGCG-------------CCCCAAGCC-TTCTGGCCGAGGGCACGTCTGCCTGGGTGTC---ACAAAT--------------------------------------------------------------------------------------------------------------------------------------------------------TCTCGT-----------------CATATAGTC-------------------------------AGGAGCG--TCTT-GACATGCGG----TGGTG------------------AA--------…
427	>M01634_72_000000000-C3HGL_1_1108_28569_18417	M01634_72_000000000-C3HGL_1_1108_28569_18417	GGGGGGGGGGGGGGGGGGGGGGGGGGGGGGGGGGGG-GGGGGCG-------------CGCGAGGCC-GGTAGGCCGAGGGCACGCCTGCCTGGGTGTT---GCACAT----CGTTG--------------------CC---------------------CC---C---GTGCCTTGGCCAC-----GTGCC-------------------AGG---CAC-----------CA--AG-CGGGGCG----AATGTTGGCT-TCCCGCGAG----C---AATGT-CTCACGGTTGGTTGAAAA----CTGAGTCC-GCGGTG---GAGGGCG--CCGT-GATGGATGG----TGGCTGAGTTAAAGCTCGAGACCGA-----------------TCG-----…
12	>M01634_72_000000000-C3HGL_1_1108_2884_14272	M01634_72_000000000-C3HGL_1_1108_2884_14272	TCCAGAATCCCATGAAGCATTGAGTCTTTGAATGCA-AGTTGGG-------------CCCGAAGTC-ATTAGGCCGATGGCACGTCTGCCTGGGCGTC---ACACGT----CGTTG---------C----------CC---------------------CC---T------GGAC-CCCTT-----C-----------------------TGG---AGT-----CG--------GG-TAGGATG----GATGGTCATC-TCCCGTGCG----C---CA-AT-CGCGCGGTTGATCTAAAT---ATGAAGTCC-CCGGCG---ACCGACG--CCAT-GACAATCGG----TGGTTG---------------TCAA------------A-CCTCGG-----…
560	>M01634_72_000000000-C3HGL_1_1108_29199_13907	M01634_72_000000000-C3HGL_1_1108_29199_13907	TGCAGAATCCCGTGAACCATCGAGTCTTTGAACGCA-AGTTGCG-------------CCCGATGCC-ATTAGGTTGAGGGCACGTCTGCCTGGGTGTC---ACATAT----CGAAG--------------------CC---------------------CT----------TCCCCAAATT-----------------------------AAACTTGGT---------------GTGC-----------A-G--GG---T---GT--G-----CCA--TGAT-TAATGGTTGGCTGAAAA----TTGAGACC-TTGGCA---GGGTGTG--CCAT-GATTAATGG----TGGTTGTGTGACGCACGAAGCCCAA-------TCATGATCATTGC-----…
267	>M01634_72_000000000-C3HGL_1_1108_7381_15439	M01634_72_000000000-C3HGL_1_1108_7381_15439	TGCAGAATCCCGTGAACCATCAAGTCTTTCAACGCA-AGTTGTGCCCCAAGCCTTCTCCCCAAGCC-TTCTGGCCGAGGGCATGTCTGCCTGGGTGTC---ACAAAT----CGTCG--------T-----------CC---------------------CC---C------TATC--CTCT-----C-----------------------GAG---GAT----------------A-TGGGACG----TAAGCTGATC-TCCCGTGTG----T---TACTG-CAAGCGGTTGGCCAAAAT----CCAAGCTA-AGGACG-CCAGGAGCA--TCCT-GACATACGG----TGGTG------------------AA----------------TTCA-----…
15	>M01634_72_000000000-C3HGL_1_1108_8575_25109	M01634_72_000000000-C3HGL_1_1108_8575_25109	TGCAGAATCCCGTGAACCATCGAGTCTTTGAACGCA-AGTTGCG-------------CCCGAAGCC-ATTAGGCCGAGGGCACGCCTGCCTGGGTGTT---GCACAT----CGTTG--------------------CC---------------------CC---C---GTGCCTTGGCCAC-----GTGCC-------------------AGG---CAC-----------CA--AG-CGGGGCG----AATGTTGGCT-TCCCGCGAG----C---AATGT-CTCACGGTTGGTTGAAAA----CTGAGTCC-GCGGTG---GAGGGCG--CCGT-GATGGATGG----TGGCTGAGTTAAAGCTCGAGACCGA-----------------TCG-----…
592	>M01634_72_000000000-C3HGL_1_1108_8874_19201	M01634_72_000000000-C3HGL_1_1108_8874_19201	GCTGGTATGCGATACTTGGTGTGAATTGCAGAATCCCGTGAACCATCGAGTCTTTGAACGCA-AGTTGCG-------------CCCCAAGCC-TTCTGGCCGAGGGCACGTCTGCCTGGGTGTC---ACAAAG-----GGCG-------------------------------------------CC-----------------------------------------------------------------------------------------------------------------------------------------------------------------AGGAGCG--TCTC-GACATGCGG----TGGTG------------------A…
606	>M01634_72_000000000-C3HGL_1_1108_9483_20490	M01634_72_000000000-C3HGL_1_1108_9483_20490	TGCAGAATCCCGTGAACCATCGAGTCTTTGAACGCA-AGTTGCG-------------CCCGATGCC-ATTAGGTTGAGGGCACGTCTGCCTGGGTGTC---ACATAT----CGAAA--------------------CC---------------------TC---C---TGCCAATTTCCCT---------------------------TTGATTATTGT----------------G-CAGGGTG----GATGTTGGCC-TCCCGTGAA--CTC---TTTTTGGTCATGGTTGGTTGAAAA----TTGAGACC-TTGGCA---GGGTGTG--CCAT-GATTAATGG----TGGTTGTGTGACGCACGAAGCCCAA-----------------TCA-----…
675	>M01634_72_000000000-C3HGL_1_1108_9700_16236	M01634_72_000000000-C3HGL_1_1108_9700_16236	TGCATAGTCCCGTGAACCATCGAGTCTTTGAACGCA-AGTTGCG-------------CCCCAAGCC-TTCTGGCCGAGGGCACGTCTGCCTGGGTGTC---ACAAAT----CGTCG-------T------------CC---------------------CC---C------CATC--CTCT-----C-----------------------GAG---GAT----------------A-TCGGACG----GAAGCTGGTC-TCCCGTGTG----T---TACCG-CACGCGGTTGGCCAAAAT----CCTAGCTA-AGGATG-CCAGGAGCG--TCTT-GACATGCGG----TGGCG------------------AA----------------TTCA-----…
108	>M01634_72_000000000-C3HGL_1_1108_9755_23077	M01634_72_000000000-C3HGL_1_1108_9755_23077	TGCAGAATCTCGTGAACCATCGAGTCTTTGAACGCA-AGTTGCA-------------CCCCAAGCC-TTCTGGCCGAGGGCATGTCTGCTTGGGTGTC---ACAAAT----CGTTG--------T-----------CC---------------------CC---C------CATC--CTCT-----C-----------------------GAG---GAT----------------A-TGGGACG----GAAGCTGATC-TCCCATGTG----T---TACC--CACGCGGTTGGCCAAAAT----CCGAGCTA-AGGACG-CCAGGAGCA--TCTT-GACATGCAG----TGGTG------------------AA----------------TTCA-----…
180	>M01634_72_000000000-C3HGL_1_1109_10095_23271	M01634_72_000000000-C3HGL_1_1109_10095_23271	TGCAGAATCCCGTGAACCATC-AGTTTTTGAACGCA-AGTTGCG-------------CCCTAGGCC-ATCTGGCCAAGGGCACGCCTGTCTGGGCGTC---ACGCAC-TG-AGTCG--------------------CC---------------------CC---T--------TCTTCTCG-----------------------------GAG---GAG------------A--GA-TGGGGCG----GAAATTGGAC-CCCCGTGC---------TTCCA-AGTGCGGTCGGCCTAAAA----CTTGGCCC-TTGGAG---GCCGGCG--TCAC-GATCCGTGG----TGGTTGGC---------------------------------ATCA-----…
112	>M01634_72_000000000-C3HGL_1_1109_11326_22946	M01634_72_000000000-C3HGL_1_1109_11326_22946	TGCAGAATCCCGTGAACCATCGAGTCTTTGAACGGA-AGTTGCG-------------CCCCGAGCC-TTCTGGCCAAGGGCACGTCTGCCTGGGTGTC---ACAAAT----CGTCG--------T-----------CC---------------------CC---C------TATC--CTCT-----C-----------------------GAG---GAT----------------A-TGGGACG----GAAGCTGATT-TCCCGTGTG----T---TACCG-CACGCGGTTGGCCAAAAT----CCAACCTA-AGGACG-CCATGAGCA--TCTT-GACATGCGG----TGGTG------------------AA----------------TTCA-----…
350	>M01634_72_000000000-C3HGL_1_1109_12479_3648	M01634_72_000000000-C3HGL_1_1109_12479_3648	TGTAGAATCACGTGAACCAGCAAGTCTTTGAACGCA-AGTTGCA-------------CCCCAAGCC-TTCTGGCCGAGGGCACGTCTGCCTGGGTGTC---ACAAAT----ATTCG--------T-----------CC---------------------CC---C------CATC--CTCT-----C-----------------------GAG---GAT----------------A-TGGGACG----GAAGCTTATC-TCTTGTGTG----T---TACCG-CACGTGAATGGCCAAAAT----CCGAGCTA-AGGATG-CCAAGAGCA--TCTT-GACATGCAG----TGGTG------------------AA----------------TTCA-----…
510	>M01634_72_000000000-C3HGL_1_1109_12674_28092	M01634_72_000000000-C3HGL_1_1109_12674_28092	TGCAGAATCCCGTGAATCACCGAGTCTTTGAACGCA-AGTTGCG-------------CCCAAAGCC-TTTAGGTTGAGGGCACGTCTGCCTGGGCGTC---ACGTAT--CCCGTCG-----CAC------------CC---------------------CC---A---ACCCGTCCCAACT-----C-----------------------GGGCATGAT-----------GGCTGGTGGGAGCG----GATATTGGCC-TCCCGTGTA--------CTCGC-GTTACGGTTGGTCTAAAA----TTGACCCC-CGAGCG---AGGAACG--TCACGACAAAGACCC---CAAAG------------CATCGTCA------------CGATGATG-----…
266	>M01634_72_000000000-C3HGL_1_1109_15295_10850	M01634_72_000000000-C3HGL_1_1109_15295_10850	TGCAGAATCCCGTGAACCATCGAGTCTTTGAACGCA-AGTTGCG-------------CCCCAAGCC-TTCTGGCCGAGGGCATGTCTGCCTGGGTGTC---ACAAAT----CGTCG--------------------TC---------------------CC---C------CATC--CTCT-----C-----------------------GAG---GAT----------------A-TGGGATG----GAAGCTGATC-TCCTGTGTG----T---TACCA-CACGCGGTTGGCTAAAAT----CCAAGCTA-AGGACG-CCAGGAGCG--CCTT-CACATGCGG----TGGTG------------------AA----------------TTCA-----…
505	>M01634_72_000000000-C3HGL_1_1109_15520_9707	M01634_72_000000000-C3HGL_1_1109_15520_9707	TGTAGAATCCCGTGAATCACCGAGTCTTTGAACGCA-AGTTGCA-------------CCCAAAGCC-TTTAGGCTAAGGGCACGTCTACCTGGGCATC---ACATAT--CCCGT-----------------------T---------------------TC-------A-CC--CCCAACT-----C-----------------------GGGTATGAT-----------GGCTGGTGGGAGCG----GATATTGGCC-TCTCGTGTA--------CTCGC-GTTATGGTTGGTCTAAAA----TTGAGCCT-CGTGCG---ACGAACG--TCAC-GACAAGTGG----TGGTC------------TGTAATAG------------CTATTTCG-----…
70	>M01634_72_000000000-C3HGL_1_1109_17253_4010	M01634_72_000000000-C3HGL_1_1109_17253_4010	TGCAGAATCCCGTGAACCATCGAGTCTTTGAACGCA-AGTTGCG-------------CCCGAAGCC-ACTAGGCTGAGGGCACGTCTGCCTGGGTGTC---ACGTAT-CG-TGTTG--------------------CC---------------------AC---C----GATCACTC-ACT-----CCTAG-------------------AGG---AGA-TGTGCTG---GT--TT-GGGGGCG----GAAATTGGCC-TCCCGTGC---------CTTGT-TGTGCGGCTGGCACAAAA----GCGAGTCT-CTGACA---ATGGTCG--TCGC-GACAT-CGG----TGGTTGTA-------------AAAA------------GAC---CT-----…
507	>M01634_72_000000000-C3HGL_1_1109_17522_11624	M01634_72_000000000-C3HGL_1_1109_17522_11624	TACAGAATCCCGTGAATGACCAAGTCTTTGAACGCA-AGTTGCT-------------CCCAAAGCC-TTTAGGCTAACGGCACGTCTGCCTGGGTGTC---ACGTAT--CCCGTCA-----CAC------------CC---------------------CC---A---ACCCGTCCCAACT-----C-----------------------GGGTATGAT-----------GGCTGGTGGGAACA----AATATTATCC-TCCTGTGTA--------CTTGC-ATTACGGTTGGTCTAAAA----TTGAGCCC-CGAGCG---ATGAATG--TCAT-GATAAGAGG----TGGTC------------TGTAATAG------------CTATTTCG-----…
360	>M01634_72_000000000-C3HGL_1_1109_19075_17218	M01634_72_000000000-C3HGL_1_1109_19075_17218	TTTAGAATCCCATGAACCATCGAGTCTTTGAACGCA-AGTTGCG-------------CCCCAAGCC-TTCTGGCCGAGGGCACGTCTGCCTGGGTGTC---ACAAAT----CATCG--------T-----------CC---------------------CA---A------TATC--CTCT-----C-----------------------GAG---GAT----------------A-TGGGATG----GAAGCTGATC-TCCCGTGTG----T---TACCG-CACACGGCTGGCCAAAAT----CCAAGCTA-GGGACG-CCAGGAGCA--TCTT-GACATGCGG----TGGTG------------------AA----------------TTCA-----…
100	>M01634_72_000000000-C3HGL_1_1109_19803_23842	M01634_72_000000000-C3HGL_1_1109_19803_23842	TGCAGAATCCCGTGAACCATCGAGTCTTTGAACGCA-AGTTGCG-------------CCCGAAGCC-ATTAGGCCGAGGGCATGCCTGCCTTGGTGTT---GCACAT----CAGTG--------------------CC---------------------CC---C---GTGCCTTAGCCAC-----GTGTC-------------------AGG---CAC-----------CA--AG-CGGGGCA----AATGTTGGCT-TCCCGCGAG----C---AATGT-CTCACGGTTGGTTGAAAA----CTAAGTCC-GCGGTG---AAGGGCG--TCGT-GATGGATGG----TGAATGAGTTAAAGCTCGAGACCGA-----------------TCG-----…
416	>M01634_72_000000000-C3HGL_1_1109_21317_22142	M01634_72_000000000-C3HGL_1_1109_21317_22142	TGCAGAATCCCGTGAACCATTGAGTCTTTGAATGCA-AGTTGTG-------------CCCGAAGCC-TTCTGGCAGAAGGCACGCCTGCCTGGGCATC---ACGCAT--CGTGTCG--------------------CC---------------------CC---C---TTCCAACGTCCCT-----------------------------AGG---GAC----------TCGCGAGCGGGAGCG----GAAAATGGTC-TCCCGTGTG--CCT---TCTGG-CCCGTGGCTGGCCTAAAT----GAGATCCT-GCATCG---ACGGATG--TCAC-GACCAGTGG----TGGTTGAA---------------AA----------------CTCA-----…
128	>M01634_72_000000000-C3HGL_1_1109_22151_2905	M01634_72_000000000-C3HGL_1_1109_22151_2905	TGCATAATCCCGTGAACCATCGAGTCTTTGAACGCA-AGTTGCG-------------CCCC-AGCC-TTCTGGCCGAGGGGACATATGCCTGGGTGTC---ACAAAT----CGTCT-------TC-----------CC---------------------CC---C------TATC--CTCT-----C-----------------------GAG---GAT----------------A-TGGGACG----AAAGCTGATC-TCCCATGTG----T---TACCG-CACGCGGTTGGCCAAAAT----CCTAGCTC-AGGACG-TCAGGAGCA--TCTG-GACATGCGG----TGGTG------------------AA----------------TTCA-----…
500	>M01634_72_000000000-C3HGL_1_1109_23242_19530	M01634_72_000000000-C3HGL_1_1109_23242_19530	TACAGAATCCCGTGAATCACCGAGTCATTGAACGCA-AGTTGTG-------------CCCAAAGAC-TTTAGGCTGAGGGCATGTCTGCTTGGGCGTC---ACGTAT--CCCGTCG-----TAC------------CC---------------------CC---A---ACCTGTCCCAACT-----C-----------------------AGGGATGAT-----------GGCTGGTGGGTACA----GATATTGGCT-TCCCGTGTA--------CTCGC-ATTATAGTTGGTCTAAAA----TCGAGCCT-CGAGCG---ACGAACG--TCAC-GATAAGTGG----TGGTC------------TGTAATAG------------CTATTTCG-----…
357	>M01634_72_000000000-C3HGL_1_1109_24155_7992	M01634_72_000000000-C3HGL_1_1109_24155_7992	TGCAGAATCCCGTGAACCATCGAGTTTTTGAACGCA-AGTTGCG-------------CCCTAGGCC-ATCCGGCTGAGGGCACGCCTGCCTGGGCGTC---ACGCAC-TG-AGTCG--------------------CC---------------------CC---T--------TCTTCTCC-----------------------------GAG---GAG------------A--GA-TGGAGCG----GAGATTGGCC-CCCCGTGC---------CTTGC-GGTGCGGTCGGTCTAAAT----AGAGGCCC-TGGGAG---GCCAGCG--TCAC-GATTCGTGG----TGGTCGAC--------------------------------ACTTG-----…
30	>M01634_72_000000000-C3HGL_1_1109_24677_21414	M01634_72_000000000-C3HGL_1_1109_24677_21414	TGCAGAATCCCGTGAAGCATCGAGTCTTTGAACGCA-AGTTGCG-------------CCCGAAGCC-ATTAGGCCGAGGGCACGTCTGCTTGGGCGTC---ACACGT----CGTTGC-------CC----------CC---------------------CC---C------CGAC-CCCTT-----C-----------------------CGG---AGT-----CG--------GG-CGGGACG----GATGGTGACC-TCCCGTGCG--------CCAGT-CGCGCGGTTGGTCTAAAT---ATCGAGTCC-CCGGCG---ACCGGCG--CCAC-GACAATCGG----TGGTTG---------------TGAG------------A-CCTCGG-----…
125	>M01634_72_000000000-C3HGL_1_1109_26501_6871	M01634_72_000000000-C3HGL_1_1109_26501_6871	TGCAGAATCCGGTAAACCATCGAGTCTTTGAACGCA-AGTTGCG-------------CCCCAAGCC-TTCTGGCCGAGGCCACGTCTGCCTGGGTGTC---ACAAAT----CGTCG--------------------TC---------------------CC---C------CATC--CTCT-----C-----------------------GAG---GAT----------------A-TGGGACG----GAAGCTGATC-TCCCGTGTG----T---TACCG-CACGCGGTTGGCCAAAAT----CCAAGCTA-GGGACG-CCAGGAGCA--TCTT-GACATGCGG----TGGTG------------------AA----------------TTCA-----…
300	>M01634_72_000000000-C3HGL_1_1109_26735_18055	M01634_72_000000000-C3HGL_1_1109_26735_18055	TGCAGAATCCCGTGAACCATCGAGTCTTTGAACGCA-AGTTGCG-------------CCTGAAGCC-ATTAGGCTGAAGGCACGTCTGCCTGGGCGTC---ACGCAT--TGCGTCA--------------------CC---------------------CA---C---CTCCCCCGCGCCC-----CAAGCGGGCACGTC----------------GGT----------------GCGTGGGCG----GATATTGGCC-CCCCGTTCG--------CATCCGCGCGCGGTCGGCCTAAAA---AACGGGTCC-CCAATG---ACGGACA--TCAC-GACGAGTGG----TGGTTGC----------------TA------------AACCGTCG-----…
603	>M01634_72_000000000-C3HGL_1_1109_27380_9272	M01634_72_000000000-C3HGL_1_1109_27380_9272	TGCAGAATCCCGTGAACCATCGAGTCTTTGAACGCA-AGTTGCG-------------CCCCAAGCC-TTCTGGCCGAGGGCACGTCTGCCTGGGTGTC---ACAAAC----CGTCG--------------------TC---------------------CCTCTC------ATCCTTCTCG-----------------------------------GAT----------------A-TGGGACG----GAAACTGGTC-TCCCGTGTG----T---TACCG-CACGCGGTTGGCCAAAAT----CCGAGCTA-AGGGCG-----CAGTA--TTGT-------CGG----TCGTT---------------------------------------------…
807	>M01634_72_000000000-C3HGL_1_1109_27776_19811	M01634_72_000000000-C3HGL_1_1109_27776_19811	TGTAGAATCCCGTGAACCATCGAGTCTTTGAACGCA-AGTTGCG-------------CCCCAAGCC-TTCTGGCCGAGGGCACGTCTGCCTGGGTGTC---ACAAAT----GGTCA--------T-----------CC---------------------CC---C------CATC--CTCT-----C-----------------------GAG---GAT----------------A-TGGGACG----GAAGCTGATC-TCCCCTGTG----T---TACCG-CATGCGGTTGGCCAAAAT----TCGAGCTA-AGGACG-CCAGGAGCG--TCTT-GACATGCGG----TGGTG------------------AA----------------TTTA-----…
714	>M01634_72_000000000-C3HGL_1_1109_2873_14737	M01634_72_000000000-C3HGL_1_1109_2873_14737	TGCAGAATCCCGTGAACCATCGAGTCTTTGAACGCA-AGTTGCG-------------CCCCAAGCC-TTCTGGCCGAGGGCACGTCTGCCTGGGTGTC---ACAAAT----CGTCG------------------TTCC---------------------CC---C------TCAT--CCTT-----C-----------------------AAG---GAT----------------T-CGGGACG----GAAGCTGATC-TCCCGTGTG----T---TACCG-CATGCGGTTGGCCAAAAT----CCAAGCTA-AGGACG-CCAGGAGCG--TCTT-GACATGCGG----TGGTG------------------AA----------------TTCA-----…
506	>M01634_72_000000000-C3HGL_1_1109_3846_9734	M01634_72_000000000-C3HGL_1_1109_3846_9734	TATAGAATCCCGTGAATCACCGAGTCTTTGAATGCA-AGTTGCG-------------CCCAAAGCC-TTTAGACTGAGGGTACGTCTGCCTTGGCGTC---ACGTAT--CCCGTCG-----CAC------------TC---------------------CC---A---ACCCGTCCCAACT-----C-----------------------GGGTATGAT-----------GGTTGATGGGAACG----GATATTGGCC-TCCTGTGTA--------CTCGC-ATTATGGTTGGTCTAAAA----TTGAGCCC-CGAGCG---ACGAACG--TCAT-GACAAGTGG----TGGCA------------TGTAATAG------------CTATTTCG-----…
262	>M01634_72_000000000-C3HGL_1_1109_6058_10297	M01634_72_000000000-C3HGL_1_1109_6058_10297	TG-------------CAGAATCCC-GTGAACCATCGAGTCTTTGAACGCAAGTTGC---GCCCCA----AGCCT-------T------------CT---------------------GG---C------CGAG--GGCA-----C-----------------------GTG---TGC----------------C-T-GGGTG----TCA-CAAATC--GTCGTGTG----T---TACCG-CACGCGGTTGGCCAAAAT----CCTAGCTA-AGGATG-CCAGGAGCG--TCTT-GACATGCGG----TGGTG------------------AA----------------TTCA--------------------ATT-----------------CTCG---…
755	>M01634_72_000000000-C3HGL_1_1109_6778_12197	M01634_72_000000000-C3HGL_1_1109_6778_12197	TGCTGAATCCTATGAGCCATCGAGTCTTTGAACGCA-AGTTGCG-------------CCCCAAGCC-TTCTGGCCGAGGGCACGTCTGCCTGGGTGTC---ACAAAT----CGTCG--------T-----------CA---------------------CC---C------CATC--CTCT-----C-----------------------GAG---GAT----------------A-TCGGACG----GAAGCTGGTC-TCCCTTGTG----T---TACCG-CACACGGTTGGCCAAAAT----CCGAGCTA-AGGGTG-CCAGGAGCG--TCTT-GACATGCGG----TGGTG------------------AA----------------TTCA-----…
494	>M01634_72_000000000-C3HGL_1_1109_7663_8864	M01634_72_000000000-C3HGL_1_1109_7663_8864	TGTAAAATCCCATAAATCATCGATTCTTTGAACGCA-AGTTGCG-------------CCCAAAGCC-TTTAGGCTGAGGGCACGTCTACATGGGCATC---ACATAT--CCCATCG-----CAC------------CC---------------------CG---A---ACTAGTCCCAACA-----T-----------------------GGGCATGAT-----------GGCTGGTGGGAGCG----GATATTGGCC-ACCCATGTA--------CTCGC-GTTTCGGTTGGTCTAAAA----TCGAGCCC-CGAGTG---GTGAACG--TCAT-GATAAGTGG----TGGTC------------TATAATAG------------CTATTTCG-----…
534	>M01634_72_000000000-C3HGL_1_1109_9349_11249	M01634_72_000000000-C3HGL_1_1109_9349_11249	TGTAGAATCCCGTGAACCATCGGGTCTTTGAACGCA-AGTTGCG--------------CCCAAGCC-TTCTGGCCGAGGGCACGTCTGCCTGGGTGTC---ACAAAT----CGTCA-------------------T-C---------------------CC---C------CATC--CTCT-----C-----------------------GAG---GAT----------------A-TGGGACG----GAAGCTGATC-TCCCCTGTG----T---TACCG-CACGCGGTTGGCCAAAAT----CCGAGCTA-AGGACG-CCAGGAGCG--TCAT-GACATGCGG----TGGTG------------------AA----------------TTCA-----…
111	>M01634_72_000000000-C3HGL_1_1110_10095_16706	M01634_72_000000000-C3HGL_1_1110_10095_16706	TGCAGAATCCTGTGAACCATCGACTCTTTGAACGCA-AGTTGCG-------------CCCCAAGCC-TTCTGGCCGAGGGCACGTCTGCCTGGGTGTC---ACAAAT----CATCG-------T-------------C---------------------CC---C------CATC--CTCT-----C-----------------------GAG---GAT----------------A-TCGGACG----GAAGCTCTCC-TCCCGTGTG----T---TACCG-CACACGGTTGGCGAAAAT----CCGAGCTA-AGGATG-CCAGGAGCG--TCTT-GACATGCGG----TGGTG------------------AA----------------TTCA-----…
282	>M01634_72_000000000-C3HGL_1_1110_10347_11500	M01634_72_000000000-C3HGL_1_1110_10347_11500	TGCAGAATCCCGTGAACCATCGAGTCTTTGAACGCA-AGTTGCG-------------CCCCAAGCC-ATCTGGCCGAGGGCACGTCTGCCTGGGTGTC---ACAAAT----CATCA--------T-----------CC---------------------CC---C------CATC--CTCT-----C-----------------------GAG---GAT----------------A-TGGGACG----GAAGCTGATC-TCCCGTTTG----T---TACCG-CACGCGGTTGGCCAAAAT----CCTAGCTA-AGGACG-TCAGGAGCG--TCTT-GACATGCGG----TGGTG------------------AA----------------TTCA-----…
121	>M01634_72_000000000-C3HGL_1_1110_13806_18350	M01634_72_000000000-C3HGL_1_1110_13806_18350	TGCAGAATCCCGTGAACCATCGAATCTTTGAACACA-AGTGGTT-------------CCCCAAGCC-TTCTGGCCGAGGGCACGTCTGCCTGGGTGTC---ACAAAT----CGTCG-------T------------CC---------------------CC---C------CATC--CTCT-----C-----------------------GAG---GAT----------------A-TCGGATG----GAAGCTGGTC-TCCCGTGTG----T---TACCG-CACGCGGTTGGCTAAAAT----CCGAGCTA-AGGATG-CCAGAAGCG--TCTT-GACATGCGG----TGGCA------------------AA----------------TTCA-----…
791	>M01634_72_000000000-C3HGL_1_1110_14179_7108	M01634_72_000000000-C3HGL_1_1110_14179_7108	TGGAATCCCGTGAACCATCGAGTCTTTGAACGCA-AGTTGCA-------------CCCCAAGCC-TTCTGGCCGAGGGCATGTCTGCTTGGGTGTC---ACAAAT----CGTTG-------------------TCC---------------------CC---C------CATC--CTCT-----C-----------------------GAG---GAT----------------A-TGGGACG----GAAGCTGATC-TCCCATGTG----T---TACC--CACGCGGTTGGCCAAAAT----CCGAGCTA-AGGACG-TCAGGAGCG--TCTT-GACATGCGG----TGGTG------------------AA----------------TTTA-------…
769	>M01634_72_000000000-C3HGL_1_1110_16917_20922	M01634_72_000000000-C3HGL_1_1110_16917_20922	TGCAGAATCCCGTGAACCATCGAGTCTTTGAACACA-AGTTGCG-------------CCCCAAGCC-TTCTGGCCGAGGGCACGTCTGCCTGGGTTTC---ACAAAT----CGTCG-------------------T-C---------------------CC---C------CATC--CTCT-----T-----------------------GAG---GAT----------------A-TGGAACG----GAAGCTGATA-TCCCGTGTG----T---TACCA-CACGCGGTTGGCCAAAAT----CCAAGCTA-AGGACG-TCAGGAGCG--TCTT-GACATGCGG----TGGTG------------------AA----------------TTTA-----…
178	>M01634_72_000000000-C3HGL_1_1110_17043_8004	M01634_72_000000000-C3HGL_1_1110_17043_8004	TGCAGAATCCCGTGAACCATCGAGTCTTTGAACGCA-AGTTGCG-------------CCCCAAGCC-TTCTGGCCGAGGGCACGTCTGCCTGGGTGTC---ACAAAT----CGTCG--------T-----------CC---------------------CC---C------CATC--CTCT-----C-----------------------GAG---GAT----------------A-TCGGACG----GAAGCTGGTC-TCCCGTGTG----T---TACCG-CACGCGGTTGGCCAAAAT----CCTAGCTA-AGGATG-CCAGGAGCG--TCTT-GACATGCGG----TGGTG------------------AA----------------TTTA-----…
243	>M01634_72_000000000-C3HGL_1_1110_18445_10569	M01634_72_000000000-C3HGL_1_1110_18445_10569	TGCAGAATCCCGTGAACCATCGAGTCTTTGAACGCA-AGTTGCG-------------CCCCGAGCC-TTCTGGCCGAGGGCACATCTGCCTGGGTGTC---ACAAAT----AGTCG--------T-----------CC---------------------CC---C------CATC--CTCT-----C-----------------------GAG---GAT----------------A-TGGGACG----GAAGCTGAT---------------T---TACCG-CACGCGGTTGGCCAAAAT----CTGACCTA-AGGACG-CCATGAGCG--TCTT-GACATGCGG----TGGTG------------------AA----------------TTCA-----…
426	>M01634_72_000000000-C3HGL_1_1110_18673_13522	M01634_72_000000000-C3HGL_1_1110_18673_13522	TGCAGAATCCCGCGAACCATCGAGTCTTTGAACGCA-AGTTGCG-------------CCCGAGGCC-TCTTGGCCAAGGGCACGCCTGCCTGGGCGTCACGCCAAAC-ACGC------------------------T----------------------CC----------CACCCCTCAT-----C-----------------------GGG---TTG---------------TG-GGATGCG----GCATGTGGCC-CCCCGCCT---------CGTAA-GAGTCGGTGGGCCAAAGA----TGTGGCTG-CCGGCGTATCGTTCCG-GACAC-AGCGCGTGG----TGGGCGAACTCGC----------------------------TTTA-----…
783	>M01634_72_000000000-C3HGL_1_1110_19300_3963	M01634_72_000000000-C3HGL_1_1110_19300_3963	TGCAGAATCCCGTGAACCAACGAGTCTTTGAACGCA-AGTTGCG-------------CCCGAAGCC-ATTAGGCCGAGGGCACGTCTGCCTGGGTGTC---ACACAT----CGTTG--------------------CC---------------------CC---A---------ATGCCAA-----TCGCCTCACTTTGT------AGGTATT---TGC----------------T-TGGGGTG----AATGTTGGCC-TCCCGTGAG----C---TTTGT-CTCACGGTTGGTTGAAAA----TCGAGTGC-ATGGTG---TCGGGTGTACCAT-GATGGATGG--TGGTTGAGTGATGATGCTCGAGACCAA-----------------TCA-----…
341	>M01634_72_000000000-C3HGL_1_1110_20517_11108	M01634_72_000000000-C3HGL_1_1110_20517_11108	TGCAGAATCCCGTGAACCATCGAGTCTTTGAACGCA-AGTTGCG-------------CCCGAAGCC-TTCTGGCCGAGGGCACATCTGCCTGGGTGTC---ACAAAT----CATCA-------T------------CC---------------------CC---C------CATC--GTCT-----C-----------------------GGA---GAT----------------A-TGGGACG----GAAGCTGATC-TCCCGTGTG----T---TACCG-CACGTGGTTGGCCAAAAT----CCTAGCTA-AGGATG-CCAGGAGCG--TCTT-GACATGCGG----TGGTG------------------AA----------------TTCA-----…
491	>M01634_72_000000000-C3HGL_1_1110_20678_13916	M01634_72_000000000-C3HGL_1_1110_20678_13916	TGCAGAATCCCGTGAATCACCGAGTCTTTAAACGCA-TGTTGTA-------------CCCAATGCA-TTTAGGCTGAGGACACGTCTTTCTGGGTGTC---ACGTAT--CCCGTCG-----CAC------------CC---------------------CC---A---ACCCATCCCAAAT-----C-----------------------GGGCATGAT-----------GACTAGTGGGAGCG----GATATTGCCC-TCCCATGTA--------CTCGC-GTTACAGTTGGTCTAAAA----TTGAGCCT-CGAGCG---ATGAATG--TCAC-GACAAGTGG----TGGTC------------TGTAATAG------------CTATTTCA-----…
547	>M01634_72_000000000-C3HGL_1_1110_23210_23315	M01634_72_000000000-C3HGL_1_1110_23210_23315	TGCAGAATCCCGTGAACCATCGAGTCTTTGAACGCA-AGTTGCG-------------CCCCAAGCC-TTCTGGCCGAGGGCACGTCTGCCTGGGTGTC---ACAAAT----CGTTG--------T-----------CC---------------------CC---C------CATC--CTCT-----C-----------------------GAG---GAT----------------A-TGGGACG----GAAGCTGATC-TCCCATGTG----T---TACC--CACGCGGTTGGCCAAAAT----CCGAGCTA-AGGACG-CCAGGAGCA--TCTT-GACATGCAG----TGGTG------------------AA----------------TTCA-----…
801	>M01634_72_000000000-C3HGL_1_1110_24115_22200	M01634_72_000000000-C3HGL_1_1110_24115_22200	TACAGAATCCCGTGAACCATCGAGTCTTTGAACGCA-AGTTGCG-------------CCCCAAGCA-TTCTGGCCGAGGGTACGTCTGCCTGGGTGTC---ACAAAT----CGTCG-------------------TCC---------------------CC---C------CATC--CTCT-----C-----------------------GAG---GAT----------------A-TGGGACG----GAAGCTGATC-TCCCGTGTG----T---TACCG-CACGCGGTTGCCCAAAAT----CCGAGCTA-AGGACG-TCAGGAGCT--TCTT-GACATGCGA----TGGTG------------------AA----------------TTTA-----…
18	>M01634_72_000000000-C3HGL_1_1110_24328_14745	M01634_72_000000000-C3HGL_1_1110_24328_14745	TGCAGAATCCCGTGAACCATCGAGTCTTT----G-A-A----CG-------------CCCGAAGCC-ATTAGGCCGAGGGCACGTCTGCCTGGGCGTC---ACACGT----CGTTG--------CC----------CC---------------------CC---C------CGAC-CCCTT-----G-----------------------CGG---AGT-----CG--------GG-CGGGACG----GATGGTGATC-TCCCGTGCG--------CCAGT-CGCGCGGTTGGTCTAAAT---ATCGAGTCC-CCGGCG---ACCGGCG--CCGC-GACAATCGG----TGGTTG---------------TGAG------------A-CCTCGG-----…
423	>M01634_72_000000000-C3HGL_1_1110_24630_19848	M01634_72_000000000-C3HGL_1_1110_24630_19848	TGTAGAATCCCGTGAACCATCGAGTCTTTGAATGCA-AGTTATG-------------CCCGAAGCC-ATTAGGCCGAGGGCACGCCTGCCTGGGTGTT---GCACAT----CCTTG--------------------CC---------------------CC---C---GTGCCTTGGCTAC-----GTACC-------------------AGG---CAC-----------CA--AG-CGGGGTG----AATGTTGGCT-TCCCGCGAG----C---AATGT-CTCACGGTTGGTTGAAAA----TTGAGTCC-GCGGTG---GAGGGCG--CCGT-GATGGATGG----TGGCTGAGTTAAAGCTCGAGACCGA-----------------TCA-----…
294	>M01634_72_000000000-C3HGL_1_1110_26140_17735	M01634_72_000000000-C3HGL_1_1110_26140_17735	CTGGTGCTGGTATGCGATA------CTTGGTGTG-AATTGCA----------------GAATCCCGTGA-ACC-ATCGAGTCTTTGAATGCAAGTT---GCGC-C----CGAAG-------------------------------------------C----C---AT---TAGGCCGA-----------------------------G-G------------------------GCA--CG-----------------CC-TGC------------------CTGG--GTGTTGCAC---ATCGAGACCGATCGTG--------CGTGTCAC-CCCCACCAG--------------------------------------------------------…
546	>M01634_72_000000000-C3HGL_1_1110_29561_14497	M01634_72_000000000-C3HGL_1_1110_29561_14497	TGCAGAATCCCGTGAACCATCGAGTCTTTGAACGCA-AGTTGCG-------------CCCCAAGCC-TTCTGGCCGAGGGCACGTCTGCCTGGGTGTC---ACAAAT----CGTCG--------T-----------CC---------------------CC---C------CATC--CTCT-----C-----------------------GAG---GAT----------------A-TGGGACG----GAAGCTGATC-TCCCGTGTG----T---TACCG-CACGCGGCTGGCCAAAAT----CCTAGCTA-AGGACG-TCAGGAGGG--TCTT-GACATTAGG----TGGTG------------------AA----------------TTCA-----…
676	>M01634_72_000000000-C3HGL_1_1110_6311_15114	M01634_72_000000000-C3HGL_1_1110_6311_15114	CGAGCTCTACACATCGTACGCCTGGTGCTGGTATGCGATACTTGGTGTGAATTGCAGAATCCCGTGAACCATCGAGTCTTTGAACGCA-AGTTGCG-------------CCCCAAGCC-TTCTGGCCGAGGGCACGTCTGCCTGGGTGTC---ACAAAT----CGTCG--------------------TC---------------------CC----------CCCATCCTCTC----------------------------GAG---GAT----------------A-TGGGACG----GAAGCTGATC-TCCCGTGTG----T---TACCG-CACGCGGTTGGCCAAAAT-----------------------------------------------…
197	>M01634_72_000000000-C3HGL_1_1110_7071_10548	M01634_72_000000000-C3HGL_1_1110_7071_10548	TGCAGAATCCCGTGAACCATCGAGTCTTTGAACGCA-AGTTGCG-------------CCCGAGGCC-TCCTGGTCGAGGGCACGTCTGCCTGGGTGTC---ACGCAT----CGTCG--------------------CC---------------------CC---C------GCTCCCCTCGGCTCAC-----------------------GA------------------------------------G-----GG-C-TCCCGCGCA----C---TCCCG-CCCGTGGTTGGCCTAAAA----TCGAGTCC-CCGGCG---ACGGTCG--CCAC-GACAAGCGG----TGGTTGAG---------------AG-------------------------…
695	>M01634_72_000000000-C3HGL_1_1110_7574_16991	M01634_72_000000000-C3HGL_1_1110_7574_16991	CGAAGCCGTTAGGCCGAGGGCACGTCTGCCTGGGCG-TCTCACAT------------CGCGTCGCC-CCCCCCACCCACCCTCGGGTGCCGGG-----------------------------------------------------------------------C------------------------------------------------------------------------GGGGGCG----GACAGTGGCC-CCCCGTGAG----C---CGCAGGCTCGCGGTCGGCCCAAAA---AACGAGTCG-CCGGCG--ACCTGACG--TCAC-GACAAGTGG----TGGTAGAG---------------AA-------------------------…
754	>M01634_72_000000000-C3HGL_1_1110_7822_13785	M01634_72_000000000-C3HGL_1_1110_7822_13785	TGCAGAATCCCGTGAACCATCGAGTCTTTGAACGCA-AGTTGCG-------------TCCGATGCC-ATTAGGTTGAGGGCACGTCTGCCTGGGTGTC---ACATAT----CGAAG--------------------CC---------------------CT----------TCCCCAAATT-----------------------------AAACTTGGT---------------GTGCAGGGTG----AATGTTACGCTCGTGATGAG---ACCTCAGGTCAGGCGGGGATACCCGCTGAA---TTTAAGCA-TATCAA---TAAGCGG--AGGA-GGCTGACTG----ACTCTGCGTAGATCTCGTATGCCGTC------TTCTGCTTGAAAA-----…
363	>M01634_72_000000000-C3HGL_1_1110_7978_24442	M01634_72_000000000-C3HGL_1_1110_7978_24442	TGCAGAATCCCGTGAACCATCGAGTCTTTGAACGCA-AGTTGCG-------------CCCCAAGCC-TTCTGGCCGAGGGCACGTCTGCATGGGTGTC---ACAAAT----GGTCA--------T-----------CC---------------------CC---C------CATC--CTCT-----C-----------------------GAG---GAT----------------A-TGGAACG----GAAGCTGATC-TCCCCTGTG----T---TACCG-CATGCGGTTGGCCAAAAT----CCGAGCTA-AGGACG-TCAGAAGCG--TCTT-GACATGCGG----TGGTG------------------AA----------------TTTA-----…
367	>M01634_72_000000000-C3HGL_1_1110_8286_19148	M01634_72_000000000-C3HGL_1_1110_8286_19148	TGCAGAATCCCGTGAACCATCGAGTCTTTGAACGCA-AGTTGCG-------------CCTGAAGCC-ATTAGGTTGAAGGCACGTCTGCCTGGGCGTC---ACGCAT--TGCGTCA-----TCCACTCACCCCGTGCC---------------------TC---A--------TCGGCGGG-----T-----------------------AAG-----------TGC----------GTGGGAG----GATATTGGCC-CCCCGTTCA----C---ATTCG-TGCTCGGTCGGCCTAAAAATGAC-GGTCC--CCGATG-AC--GGACA--TCAC-GGCAAGTGG----TGGTTG-------------CCAAAC------------CGTCGC-------…
116	>M01634_72_000000000-C3HGL_1_1110_8840_27208	M01634_72_000000000-C3HGL_1_1110_8840_27208	TGCAGAATCCCGTGAACCATCGAGTCTTTGAACGCA-AGTTGCG-------------CCCCAAGCC-TTCTGGCCGAGGGCACGTCTGCCTGGGTGTC---ACAAAT----CGTCG-----------------T--CC---------------------CC---C------CATC--CTCT-----C-----------------------GAG---GAT----------------A-TGGGATG----GAAGCTGATC-TCCCGTGTG----T---TACCG-CACGCGGTTGGCCAAAAT----CCGAGCTA-AGGACG-TCAGGAGCG--TCTT-GACATGCGG----TGGTG------------------AA----------------TTTA-----…
113	>M01634_72_000000000-C3HGL_1_1110_9675_19836	M01634_72_000000000-C3HGL_1_1110_9675_19836	TGCAGAATCCCGTGAACCATCGAGTCTTTGAACGCA-AGTTGCG-------------CCCCAAGCG-TTCTGGCCGAGGGCACGTCTGCCTGGGTGTC---ACAAAT----CGTCG--------T-----------CC---------------------CC---C------CATC--CTCT-----C-----------------------GAG---GAT----------------A-TGGGACG----GAAGCTGATC-TCCCATGTG----C---TACCG-CACGCGGTTGGCCAAAAT----CCGAGCTA-AGGACG-TGAGGAGCG--TCTT-GACATGCGG----TGGTG------------------AA----------------TTTA-----…
158	>M01634_72_000000000-C3HGL_1_1111_10046_22604	M01634_72_000000000-C3HGL_1_1111_10046_22604	CGCAGAATCCCGTGAACCATCGAGTCTTTGAACGCA-AGTTGCG-------------CCCCAAGCC-TTCTGGCCGAGGGCACGTCTGCCTGGGTGTC---ACAAAT----TGTCG-------------------T-C---------------------CC---C------CATC--CTCT-----C-----------------------GAG---GAT----------------A-TGGGACG----GAAGCTGATC-TCCCGTGTG----T---TACCG-CACGCGGTTGGCCAAAAT----CCGAGCTA-AGGATG-TCAGAAGCG--TCTT-GACATGCGG----TGGTG------------------AA----------------TTTA-----…
795	>M01634_72_000000000-C3HGL_1_1111_11061_25889	M01634_72_000000000-C3HGL_1_1111_11061_25889	TGCAGAATCCCGTGAACCATCGAGTCTTTGAACGCA-AGTTGCG-------------CCCCAAGCC-TTCTGGCCGAGGGCACGTCTGCCTGGGTGTC---ACAAAT----CGTCG-------------------TCC---------------------CC---C------CATC--CTCT-----C-----------------------GAT---GAT----------------A-GGGGACG----GAAGCTGATC-TCCCGTGTG----T---TACCG-CACGCGGTTGGCAAAAAT----CCGAGTTA-AGGACG-CTAGGAGCG--TCTT-GACATGCGG----TGGTG------------------AA----------------TTAA-----…
135	>M01634_72_000000000-C3HGL_1_1111_11633_13145	M01634_72_000000000-C3HGL_1_1111_11633_13145	TGCAAAATCCCGTGAACCATCGAGTCTTTGAACGCA-AGTTTCG-------------CCCCAAGCC-TTCTGGCCGAGGGCACGTTTGCCTGGGTGTC---ACAAAT----CGTCG-------T------------CC---------------------CC---C------CATC--CTCT-----C-----------------------GAG---GAT----------------A-TGGGACG----GAAGCTGGTC-TCCCGTGTG----T---TACCG-CACGCGGTTGGCCAAAAT----CCGAGCTA-AGGATG-CCAGGAGCG--TTTT-GACATGCGG----TGGTG------------------AA----------------TTCA-----…
214	>M01634_72_000000000-C3HGL_1_1111_14026_6937	M01634_72_000000000-C3HGL_1_1111_14026_6937	TGCAGAATCCCGTGAACCATCGAGTCTTTGAACGCA-AGTTGCG-------------CCCGAAGCC-ATTAGGCCGAGGGCACGCCTGCCTGGGTGTT---GCACAT----CGTTG--------------------CC---------------------CT---C---------------------------------------------GTG---CCT------------------TGG-------------------CCACGTGCC--AGG---CACCAAGCAGTGGCTGAGTTAAAG---CTCGAGACCGATCGTG--------CGTATCAC-CCCCACCAG------------------------------------------------------…
50	>M01634_72_000000000-C3HGL_1_1111_15259_6618	M01634_72_000000000-C3HGL_1_1111_15259_6618	TGCAGATTCCCGTGAACCATCGAGTCTTTGAACGCA-AGTTGCA-------------CCCCAAGCC-TTCTGGCCGTCGGCACGTCTGCCTGGGTGTC---ACAAAT----CATCG--------------------TC---------------------CC---C------CATC--CTCT-----C-----------------------GAG---GAT----------------A-TGGGACG----GAAGCTGATC-TCCCGTGTG----T---TACCG-CACGCGGTTGGCCAAAAT----CCAAGCTA-AGGACG-CCAGGAGCG--TCTT-GACATGCAG----TGGTG------------------AA----------------TTCA-----…
208	>M01634_72_000000000-C3HGL_1_1111_15438_5197	M01634_72_000000000-C3HGL_1_1111_15438_5197	TGCAGAATCCCGTGAACCATCGAGTCTTTGAACGCA-AGTTGCG-------------CCCGACGCC-TTCGGGCTGAGGGCACGCCTGCCTGGGCATC---ACGCAT--CGCGTCG--------------------CC---------------------CC---C------ATACCAATTT-----------------------------------GGG----------------G-GAGGGCG----GAT-ATGGCA-T--C---------------------C-C-----G-CAAAAA----ATGATCCC-TCATCG---ACGGATG--TCAC-ATCCAGTGG----TGGTTGAA---------------AG----------------ATCA-----…
641	>M01634_72_000000000-C3HGL_1_1111_15577_25031	M01634_72_000000000-C3HGL_1_1111_15577_25031	CGAGTTCTCCCCATCGTACGCCTGGTGCTGGTATGCGATACTTGGTGTGAATTGCAGAATCCCGTGAACCATCGAGTCTTTGAACGCA-AGTTGCG-------------CCCCAAGCC-TTCTGGCCGAGGGCACGTCTGCCTGGGTGTC---ACAAAC----CGTCG--------------------TC---------------------CC---T---CTCATCCTTCTCG-----------------------------------GAT----------------A-TGGGACG----GAAATTGGTC-TCCCGTGTG----T---TACCG-CACGCGGTTGGCCAAAAT-----------------------------------------------…
514	>M01634_72_000000000-C3HGL_1_1111_16573_25556	M01634_72_000000000-C3HGL_1_1111_16573_25556	TACAGAATCCCGTGAATCACCGAGTCTTTGAATGCA-AGTTGCA-------------CCCAAAGCC-TTTAGGCTGAGGGAACGTCTGCCTGGGCATC---ACGTAT--CCCATCG-----CAC------------CC---------------------CC---A---ACCCATCCCAACA-----C-----------------------AGGTATGGT-----------GGCTGGTGGGAGCG----GATATTGGCC-TCCCGTGTA--------CTCGC-GTTATGGTTGGTTTAAAA----TCGAGCCC-CGAGCG---ATGAACG--TCAC-GATAAGTGG----TGGTC------------TGTAATAG------------TTATTTCG-----…
378	>M01634_72_000000000-C3HGL_1_1111_16609_25662	M01634_72_000000000-C3HGL_1_1111_16609_25662	TGC-AGAATCC-------------CGTGA-ACC-ATCAAGTC-TTTGAACG-CAAGTTGCGCCCA---AGGCCT----CCTAG---------------------T---------------------TG---A------GGGCACGTCTGCCTGG-----------------------GTG---TCA------------------CGCATCG----TCGCCCCCGC-TCCCCTCGA----C---TCACG-AGGGCGG-GGGAGGATAC----TGGTCTCC-CGCGTG---ATGGTCG--CCAT-GACAAGTTG----TGGTTGAG---------------AG----------------------------------------ACC---------------…
469	>M01634_72_000000000-C3HGL_1_1111_17019_4181	M01634_72_000000000-C3HGL_1_1111_17019_4181	TGTAGAATCCCATGAATCACCGAGTCTTTGAACGCA-AGTTGCG-------------CACAAAGCC-TTTAGGCTGAGGGCACGTCTACTTGGGCATC---ACGTAT--CCCGTTG-----CAC------------CA---------------------CC---A---ACCTGTTCCAACT-----C-----------------------GGGCATAAT-----------GGTTGGTGGGAGTG----GATATTGGCC-TCCCGTGTA--------CTTGC-ATTATGGTTGGTCTAAAA----TCGAGCCC-CGAGCG---ACGAATG--TCAC-GACAAGTGG----TGGTC------------TGTAATAG------------CTATTTTG-----…
607	>M01634_72_000000000-C3HGL_1_1111_17278_7530	M01634_72_000000000-C3HGL_1_1111_17278_7530	TGCAGAATCCCGTGAACCATCGAGTCTTTGAACGCA-AGTTGCG-------------CCCGATGCC-ATTAGGTTGAGGGCACGTCTGCCTGGGTGTC---ACATAT----CGAAG--------------------CC---------------------TC---C---TGCCAATTTCCCT---------------------------TTGATTATTGT----------------G-CAGGGTG----GATGTTGTCC-TCCCGTGAA--CTC---TTTTTGGTCATGGTTGGTTGAAAA----TTGAGACC-TTGGTA---GGGTGTG--CCAT-GATTAATGG----TGGTTGTGT--CGCACGAAGCCCAA-----------------TCA-----…
126	>M01634_72_000000000-C3HGL_1_1111_2023_18121	M01634_72_000000000-C3HGL_1_1111_2023_18121	TGCAGAATCCCGTGAACCATCGAGTCTTTGAACACA-AGTTGCG-------------CCCCAAGCC-TTCTGGCCGAGGGCACGTCTGCCTGGGTGTC---ACAAAT----CGTCG-------------------TCC---------------------CC---C------CATC--CTCA-----A-----------------------GAG---GAT----------------A-TGGGATG----GAAGCTGATC-TCCCGTGTG----T---TCCAG-CAGGCGGTTGGCCAAAAT----CCGAGCAA-AGGACG-TCAGGAGCG--TCTT-GACATGCGG----TGGTG------------------AA----------------TTTA-----…
46	>M01634_72_000000000-C3HGL_1_1111_20664_12430	M01634_72_000000000-C3HGL_1_1111_20664_12430	TGCAGAATCCCGTGAACCATCGAGTCTTTGAACGCA-AGTTGCG-------------CCCGATGCC-ATTAGGTTGAGGGCACGTCTGCCTGGGTGTC---ACATAT----CGAAG--------------------CC---------------------CT----------TCCCCAAATT-----------------------------AAACTTGGT---------------GTGCAGGGTG----AATGATGGCT-TCCCGTGAG-----CCA-TTGCTCTGTCGAATTAGGCCTCT----CTTACCCA-TATGCG---TAATGTT--ACGC-TCGTGATGAG---ACCTCAGGTCAGGCGGGGATACC-C-------GC-TGAATTTAAG-----…
66	>M01634_72_000000000-C3HGL_1_1111_24499_11585	M01634_72_000000000-C3HGL_1_1111_24499_11585	CTGGTGCTGGTATGCGATA------CTTGGTGTG-AATTGCA----------------GAATCCCATTAGGCCGAGGGCACGCCTGCCTGGGTGTT---GCACAT----CGTTG--------------------CC---------------------CT---C---GTGCCTTGGCCAC-----------------------------GTG------------------------CCAGGCA-----------------CCAAGCA-----------------GTGGCTGAGTTAAAG---CTCGAGACCGATCGTG--------CGTATCAC-CCCCACCAG--------------------------------------------------------…
102	>M01634_72_000000000-C3HGL_1_1111_2507_16950	M01634_72_000000000-C3HGL_1_1111_2507_16950	TGCAGAATCCCGTGAACCATCGAGTCATTGAACGCA-AGTTACG-------------CCCCAAGCC-TTCTGGCCGAGGGCACGTCTGCCTGGGTGTC---ACAAAT----TGT----------------------CC---------------------CC---C------CATC--CTCT-----C-----------------------GAG---GAT----------------A-TGAGACG----GAAGCTGATC-TCCCGTGTG----T---TACCG-CACGCGGTTGGCCAAAAT----CCGAGCTA-AGGATG-CCATGAGCG--TCTC-GACATGTGG----TGGTG------------------AA----------------TTCA-----…
184	>M01634_72_000000000-C3HGL_1_1111_6213_11330	M01634_72_000000000-C3HGL_1_1111_6213_11330	TGCAGAATCCCGTGAACCATCGAGTCTTTGAACGCA-AGTTGCG-------------CCCGATGCC-ATTAGGTTGAGGGCACGTCTGCCTGGGTGTC---ACATAT----CGAAG--------------------CC---------------------TCCTGC------CAATTTCCCT---------------------------TTGATTATTGT----------------G-CAGGGTG----GATGTTGGCC-TCCCGTGAA----CTCTTTTTG-GTCATGGTTGGTTGAAAA----TCGAGACC-TTGGTA---GGGTGTG--CCAT-GATAGGTGG----TGGCTGTGTTACGCACGAGACCAAG-------------------------…
405	>M01634_72_000000000-C3HGL_1_1111_6945_10409	M01634_72_000000000-C3HGL_1_1111_6945_10409	TGCAGAATCCCGTGAACCATCGAATCTTTGAACGCA-AGTTGCG-------------CCCCAACCC-TTCTAGCCGAGGGCATGTCTGCCTGGGTGTT---ACAAAT----CTTCA-------------------TCC---------------------CC---C------CATC--CTCT-----C-----------------------GAG---GAT----------------A-GGGGACG----GAAGCTGATC-TCCCGTGTG----T---TACCG-CACGCGGTTGGCCAAAAT----CCGAGCTC-AGGACG-TCAGGAGCG--TCTT-GACATGCGG----TGGTG------------------AA----------------TTTA-----…
65	>M01634_72_000000000-C3HGL_1_1111_7720_22666	M01634_72_000000000-C3HGL_1_1111_7720_22666	TGCAGAATCCCATGAACCATCAAGTTTTTGAACGTG-AGTTGCG-------------CCCGAGACA-TCTTGGTCGAGGGTACTTCTGCCTGGGTGTC---ACGCAT----CGTCG--------------------CC---------------------CC---C------ACTCTCCTCGGCTCAC-----------------------GAG---GAC------------------GGGGGCG----AATACTGGTC-TCCCGCGCG----C---TCCCG-CCCGTAGTTGGCCTAAAA----TTGAGTAC-TTGACG---ACCATCG--CCAC-GACAAGCGG----TGGTTGA----------------GA------------GACCCTCG-----…
133	>M01634_72_000000000-C3HGL_1_1111_8100_25679	M01634_72_000000000-C3HGL_1_1111_8100_25679	TGCAGAATCCCGTGAACCATCGAGTGTTTGAACGCA-AGTTGCG-------------CCCCAAGCT-TTCTGGCTGAGGGCACGTCTGCCTGGGTGTC---ACAAAT----ATTCG-------T------------CC---------------------CC---C------CATA--CTCT-----C-----------------------GAG---GAT----------------A-GGGGACG----GAAGCTGATC-TCCCGTGTG----T---TTCCG-CACGCGGTTGGCCAAAAT----CCGAGCTA-AGGACG-CCAGGTGCA--TCTT-GACATGCGG----TGGTG------------------AA----------------TTCA-----…
694	>M01634_72_000000000-C3HGL_1_1111_9510_11805	M01634_72_000000000-C3HGL_1_1111_9510_11805	TGCATAATCTCGTGAACCATCGAGTATTTGAACGTA-AGTTGCA-------------CCAAAAGCC-GTTAAGCCAAGGGCACGTCTGCCTAGGCGTC---CCACAT--CGTGTTT--------------------CC---------------------CC---C-----CACACACCCCATGG--C--------------------GAAAGCTCGTGCGGG------------TGCCGAGGGTG---GATAATAGCT-CCCTATGCG----C---TGCAAGTTCGTGGTCAGCCCAACA---AATGAGTAA-CTAG-C--AATCGACA--TCAT-GACAAGTGG----TGGT----AGAG-----------AA----------------ACCC-----…
19	>M01634_72_000000000-C3HGL_1_1112_11966_14495	M01634_72_000000000-C3HGL_1_1112_11966_14495	TGCAGAATCCCGCGAACCATCGAGTCTTTGAACGCA-AGTTGCG-------------CCCGAGGCC-TCTTGGCCGAGGGCACGCCTGCCTGGGCGTCACGCCAAAT-ACGC------------------------TC---------------------CC---A------CACCCCTCAT-----C-----------------------GGG---AAG---------------TG-GGATGCG----GCATGTGGCC-CCCCGTCA---------CGCAA-GAGGCGGTGGGCTGAAGA----TGCGGCTG-CCGGCGTATCGTGTCG-GACAC-AGCGCGTGG----TGGGCGACCTCGC----------------------------TTTA-----…
194	>M01634_72_000000000-C3HGL_1_1112_12277_17269	M01634_72_000000000-C3HGL_1_1112_12277_17269	TGCAGAATCCCGTGAACCATCGAGTTTTTGAACGCA-AGTTGCG-------------CCCGAAGCC-ATCCGGTTTAGGGCACGCCTGCCTGGGCGTC---ACGCAT--CGCGTCG--------------------CC---------------------CC---C-CATCATACTTCCCTT-----------------------------AAG---GGT-----AGTCGTGGTGATTGGGAGCG----GAGATTGGCT-TCCCGTGCT-----------TGTTGTGCGGTTGGTCAAAAT----AGGAGTCC-CCTTCG---GTGGACA---CAC-GGCTAGTGG----TGGTTGTA---------------AA------------GACCCTTT-----…
261	>M01634_72_000000000-C3HGL_1_1112_13668_10450	M01634_72_000000000-C3HGL_1_1112_13668_10450	TGCAGAATCCCGTGAACCATTGAGTCTTTGAATGCA-AGTTGTG-------------CCCGAAGCC-TTCTGGCAGAAGGCACGCCTGCCTGGGCATC---ACGCAT--CGTGTCG--------------------CC---------------------CC---C---TTCCAACGTCCCT-----------------------------AGG---GAC----------TCGCGAGCGGGAGCG----GAAAATGGTC-TCCCGTGTG--CCT---TCTGG-CCCGTGGCTGGCCTAAAT----GAGATCCT-GCATCG---ACGGATG--TCAC-GACCAATGG----TGGTTGAA---------------AA----------------CTCA-----…
64	>M01634_72_000000000-C3HGL_1_1112_15720_4269	M01634_72_000000000-C3HGL_1_1112_15720_4269	TGCAGAATCCCGTGAACCATCGAGTCTTTGAACGCA-AGTTGCG-------------CCCGATGCC-ATTAGGTTGAGGGCACGTCTGCCTGGGCGTC---ACATAT----CGAAG--------------------CC---------------------TC---T---CGCCAATTTCCTA-----T-----------------------ATT---GAT-----AGGGGTATTGTG-CAGGGCG----AATGTTGGCC-TCCCGTGAG--CTT---TATTGCCTCATGGTTGGTTGAAAA----TCGAGACC-TTGGTA---GGGTGTG--CCAT-GATAGGTGG----TGGCTGTG-TTACGCACGAGACCAA------------GTAAGTCA-----…
471	>M01634_72_000000000-C3HGL_1_1112_15960_9711	M01634_72_000000000-C3HGL_1_1112_15960_9711	TACAGTATCCCGTGAATCACCGAGTCATTGAACGCA-AGTTATG-------------CCCAAAGAC-TTTAGGCTGAGGGCACGTCTCCTTGGGCGTC---ACGTAT--CCCGTCG-----CAC------------CC---------------------CC---A---ACCTGTCCCAACT-----C-----------------------GGGGATGAT-----------GGCTGGTGGGTGCA----GATATTGGCT-TCCCGTGTA--------CTCGC-ATTATAGTTGGTCTAAAA----TCGAGCCT-CGAGCG---ACGAACA--TCAC-GATAAGTGG----TGGTC------------TGTAATAG------------CTATTTCG-----…
206	>M01634_72_000000000-C3HGL_1_1112_16760_21761	M01634_72_000000000-C3HGL_1_1112_16760_21761	TGCAGAATCCCGTGAACCATCGAG-TCTTTGA-------------ACGCAAG---TTGCGCCTGAGGGCACGTCTGCCTGGGCGTC---ACATAT----CGAAG--------------------CC---------------------TC---T---TGCCAATTTCCTA-----TTGAT-------------------TGG---TAT-------------TGTG-CAAGATG-----ATGTTGGCC-TCCCGTGAG----CAC-CATCGCCTCATGGTTGGTTGAAAA----TCGAGACC-TTGGTA-----GAGTGTGCCAT-GATAAATGG----TGCATGTGTTAAGCACGAGACCAAA-------------------------------------…
659	>M01634_72_000000000-C3HGL_1_1112_18600_13491	M01634_72_000000000-C3HGL_1_1112_18600_13491	TGCAGAATCCCGTGAACCATCGAGTCTTTGAACGCA-AGTTGCG-------------CCCCAAACC-TTCTGGCCGAGGGCACGTCTGCCTGGGTGTC---ACAAAT----CTTCA--------------------TC---------------------CC---C------CATC--CTCT-----C-----------------------GAG---GAT----------------A-GGGGACA----GAAGCTGATC-TCCCTTGTG----T---TACCG-CACGTGGTTGGCAAAAAT-------------------------------CCA-----------------------------------------------------------------…
359	>M01634_72_000000000-C3HGL_1_1112_20093_15122	M01634_72_000000000-C3HGL_1_1112_20093_15122	TGCAGAATCCCGTGAACCATCGAGTTTTTGAACGCA-AGTTGCG-------------CCCTAGGCC-ATCCGGCTGAGGGCACGCCTGCCTGGGCGTC---ACGCAC-TG-AGTCG--------------------CC---------------------CC---T--------TCTTCTCC-----------------------------GAG---GAG------------A--GA-TGGAGCG----GAGATTGGCC-CCCCGTGC---------TTCCG-AGTGCGGTCGGCCTAAAA----CTTGGCCC-TTGGAG---GCCGGCG--TCAC-GATTCGTGG----TGGTCGAC--------------------------------ACTTG-----…
787	>M01634_72_000000000-C3HGL_1_1112_20260_16430	M01634_72_000000000-C3HGL_1_1112_20260_16430	TACAGAATCCCATGAACCATCGAGTCTTTGAACGCA-AGTTGCA-------------CCCCAAGCC-TTCTGGCCGAGGGCACGTCTGCCTGGGTGTC---ACAAAT----CGTCG-------------------TTC---------------------CC---C------CATC--CTCT-----C-----------------------TAG---GAT----------------A-TGGGACG----GAAGCTGGTC-TCCCGTGTG----T---TACCG-CACGCGGTTGGCCAAAAT----CCAAGCTA-AGGACG-TCAGGAGCG--TCTT-GACATGCGG----TGGTG------------------AA----------------TTTA-----…
105	>M01634_72_000000000-C3HGL_1_1112_20934_14822	M01634_72_000000000-C3HGL_1_1112_20934_14822	TGCAGAATCCCGTGAACCATCGAGTCTTTGAACGCA-AGTTGCA-----------------------------CCGAGGGCATGTCTGCTTGGGTGTC---ACAAAT----CGTTG--------T-----------CC---------------------CC---C------CATC--CTCT-----C-----------------------GAG---GAT----------------A-TGGGAAG----GAAGCTGATC-TCCCATGTG----T---TACC--CACGCGGTTGGCCAAAAT----CCGAGCTA-AGGACG-CCAGGAGCA--TCTT-GACATGCGG----TGGTG------------------AA----------------TTCA-----…
62	>M01634_72_000000000-C3HGL_1_1112_23247_13806	M01634_72_000000000-C3HGL_1_1112_23247_13806	TGCAGAATCCCGTGAACCATCGAGTCTTTGAACGCA-AGTTGCG-------------CCCGATGCC-ATTAGGTTGAGGGCACGTCTGCCTGAGTGTC---ACATAT----CGAAG--------------------CC---------------------TC---C---T--TGACTATTTT------------------------------------------------------G-CAGGGTG----GATGTTGGCC-TCCCGTGAG--CTC---TTTTGTCTCATGGTTGGTTGAAAA----TTGAGACC-TTGGTA---GGGTGTG--CCAT-GATAGATGG----TGGTTGTGTGACCCACGAGA------------------------------…
752	>M01634_72_000000000-C3HGL_1_1112_23375_10821	M01634_72_000000000-C3HGL_1_1112_23375_10821	TGCAGAATCCCGTGAACCATCGAGTCTTTGAACGCA-AGTTGCG-------------CCCGAGGCC-TCCTGGTCGAGGGCACGTCTGCCTGGGTGTC---ACGCAT----CGTCG--------------------CC---------------------CC---C------GCTCCCCTCGGCTCAC-----------------------GAG---GGC------------------GGGGGCG----GATACTGGTC-TCCCGCACG----A---TCCCG-CCCATGGTTGGCCTAAAA----TCGAGTCC-TCGACG---ATGGTCT--CCAC-GACAAGCGG----TGGTTGA----------------GA------------GACCCTCG-----…
664	>M01634_72_000000000-C3HGL_1_1112_4363_21655	M01634_72_000000000-C3HGL_1_1112_4363_21655	TGTAGAATCCCGTGAACCATCGAGTCTTTGAATGCA-AGTTGCG-------------CCCCAAGCC-TTCTGGCCGAGGGCACGTCTGCATGGGTGTC---ACAAAT----CGTCG-------------------TCC---------------------CC---C------CATC--CTCT-----C-----------------------GAG---GAT----------------A-TGGGATG----GAAGCTGATC-TCCCGTGTG----T---TACCG-CACGCGGTTGGCCAAAAT----CCGAGCTA-AGGACG-TCAGGAGCG--TCTT-GACATGCGG----TGGTG------------------AA----------------TTCA-----…
768	>M01634_72_000000000-C3HGL_1_1112_5211_6552	M01634_72_000000000-C3HGL_1_1112_5211_6552	TGCAGAATCCCGTGAACCATCGAGTCTTTGAACGCA-AGTTGCA-------------CCCCAAGCC-TTCTGGCCGAGGGCACGTCTGCCTGGGTGTC---ACAAAT----CGTCG-------------------TCC---------------------CC---C------CATC--CTCT-----C-----------------------GAG---GAT----------------A-TGGGACG----GAAGCTGATC-TCCCGTGTG----T---TACCG-CACACGGTTGGCCAAAAT----CCTAGCTA-AAGACG-TCAGAAGCG--TCTT-GACATGCGG----TGGTG------------------AA----------------TTTA-----…
434	>M01634_72_000000000-C3HGL_1_1112_6023_22605	M01634_72_000000000-C3HGL_1_1112_6023_22605	TACAGAATCCCGTGAACCATCGAGTCTTTGGACGCA-ATTTGCG-------------CCCCAAGCC-TTCTGGCCGAGGGCACGTCTGCCTGTGTGTC---ACAAAT----CGTCG------------------TCCC---------------------CC---C------CATC--CTCT-----C-----------------------GAG---GAT----------------A-TGGGACG----GAAGCTGATC-TCCCGTGTG----T---TACCG-CACGCGGTTGGCCGAAAT----CCGAGCTA-AGGACG-TCAGTAGCG--TCTT-GACATGCGG----TGGTG------------------AA----------------TTTA-----…
233	>M01634_72_000000000-C3HGL_1_1112_8247_21415	M01634_72_000000000-C3HGL_1_1112_8247_21415	TGCAGAATCCCATGAAC----------------GCA-AGTTGCG-------------CCCCAAGCC-TTCTCGCCGAGGGCACGTCTGCCAGGGTGTC---ACAAAT----CATCG--------T-----------CC---------------------CC---C------CATC--CTCT-----C-----------------------AGG---GAT----------------A-TGGGATG----GAAGCTGATC-TCCCGTGTG----T---TACCG-CATGCGGTTGGCCAAAAT----CCGAGCTA-AGGACG-CCAGGAGCG--TCTT-GACATGTAG----TGGTG------------------AA----------------TTCA-----…
101	>M01634_72_000000000-C3HGL_1_1112_9913_9712	M01634_72_000000000-C3HGL_1_1112_9913_9712	TGCAGAATTCCGTGAACCATCGAGTCTTTGAACGCA-AGTTGCG-------------CCCCAAGCC-TTCTGGCCGAGGGCACGTCTGCCTGGGTGTC---ACAAAT----TGTTG--------T-----------CC---------------------CC---C------CATC--CACT-----C-----------------------GAG---GAT----------------A-TGGGACG----GAAGCTGATC-TCCCGTGTG----T---TACCG-CACGCGGTTGGCTAAAAT----CCGAGCTA-AGGACG-CCAGGAGCG--CCTT-GACATCCGG----TGGTG------------------AA----------------TTCA-----…
25	>M01634_72_000000000-C3HGL_1_1113_13155_10619	M01634_72_000000000-C3HGL_1_1113_13155_10619	TGCAGAATCCCGTGAACCATCGAGTCTTTGAACGCA-AGTTGCG-------------CCCGAAGCC-ATTAGGCCGAGGGCACGTCTGCCTGGGCGTC---ACGCAT--CGCGTCG--------------------CC---------------------CC---C---ACTCCCC--CCTA-----------------------------GGGGCGAGC------------------GGGGGCG----GAGATTGG---CCCC---C---CG--T-----G-CGCGCGGCCGGCCCAAAT----GCGAATCCGCCGTCG---ACGCACG--TCGC-GACCAGTGG----TGGTT------------------GA------------ATCCTCAA-----…
590	>M01634_72_000000000-C3HGL_1_1113_13393_24422	M01634_72_000000000-C3HGL_1_1113_13393_24422	TGCAGAATCCCGTGAACCATCAAGTCTTTGAACGCA-AGTTGCG-------------CCCCAAGCC-TTCTGGCCGAGGGCACGTCTGCCTGGGTGTC---ACAAAT----CGTCG--------------------T----------------------CC---C------CCCATCCTCT-----C-----------------------GAG---GAT----------------A-TGGGACG----GAAGCTGATC-TCCCGTGTG----T---TACCG-CACGCGGTTGGCCAAAAT----CCAAGCTA-AGGACA-TCAGAAGCG--TCTT-GACATGCGG----TGGTG------------------AA----------------TTCA-----…
140	>M01634_72_000000000-C3HGL_1_1113_14577_14920	M01634_72_000000000-C3HGL_1_1113_14577_14920	TGCAGAATCCAGTGAACCATCGAGTCTTTGAACGCA-AGTTGCG-------------CCCCAAGTG-TTCTGGCCGAGGGCATGTCTGCCTGGGTGTC---ACAAAT----CGTCG--------T-----------CC---------------------CC---C------CATC--CTCT-----C-----------------------GAG---GAT----------------A-TGGGACG----GAAGCTGATC-TCCCGTGTG----T---TACCG-CACGCGGTTGGCCAGAAT----CCTAGCTA-AGGACG-TCAGGAGCG--TCTT-GACATGCGT----TGGTG------------------AA----------------TTCA-----…
777	>M01634_72_000000000-C3HGL_1_1113_15368_2571	M01634_72_000000000-C3HGL_1_1113_15368_2571	TGCAGAATCCCGTGAACCATCGAGTCTTTGAACGCA-AGTTGCG-------------CCCCAAGCC-TTCTGGCCGAGGGCACGTCTGCCTGGGTGTC---ACAAAT----CGTCG--------T-----------CC---------------------CC---C------CATC--CTCT-----C-----------------------GAG---GAT----------------A-TCGGACG----GAAGCTGGTC-TCCCGTGTG----T---TACCG-CACGCGGTTGGCCAAAAT-----CT-G----A-GCT--CCAGGAGCG--TCTT-GACATGCGC----TGGTG------------------AA----------------TTCA-----…
72	>M01634_72_000000000-C3HGL_1_1113_15373_15452	M01634_72_000000000-C3HGL_1_1113_15373_15452	TGCAGAATCCCGTGAACCATCGAGTTTGTGAACGCA-AGTTGCA-------------CCCCAGGCC-TTCTGGCCGAGGGCACGTCTGCCTGGGTGTC---ACAAAT----CGTCG--------T-----------CC---------------------CC---C------CATC--CTCT-----C-----------------------AAG---GAT----------------A-TGGGACG----GAAGCTGATC-TCCCGTGTG----T---TGCCG-CACGCGGTTGGACAAAAT----CCGAGCTA-AGGACG-CCAGGAGCG--TCTT-GAGCGGCGG----TGGTG------------------AA----------------TTCA-----…
753	>M01634_72_000000000-C3HGL_1_1113_15390_11309	M01634_72_000000000-C3HGL_1_1113_15390_11309	TGCAGAATCCCGTGAACCATCGAGTCTTTGAACGCA-AGTTGCG-------------CCCCAAGCC-TTCTGGCCGAGGGCACGTCTGCCTGGGTGTC---ACAAAC----CGTCG-------------------TCC---------------------CT---C------TCAT--CCTT-----C-----------------------TCG---GAT----------------A-TCGGACG----GAAGCTGGTC-TCCCGTGTG----T---TACCG-CACGCGGTTGGCCAAAAT----CCAAGCTA-AGGACG-CCAGAAGCG--TCTT-GACATGCGG----TGGTG------------------AA----------------TTTA-----…
175	>M01634_72_000000000-C3HGL_1_1113_15645_9047	M01634_72_000000000-C3HGL_1_1113_15645_9047	TGCAGAATCCCGTGAACCATCGAGTCTTTGAACGCA-AGTTGCG-------------CCCCAAGCC-TTCTGGCCGAGGGCACGTCTGCCTGGGTGTC---ACAAAT----CGTCG-------T------------CC---------------------CC---C------CATC--CTCT-----C-----------------------GAG---GAT----------------A-TGGGACG----GAAGCTGATC-TCCCGTGTG----T---TACCG-CACGCGGTTGATCGAAAT----CCGAGCCA-AGGATG-CCTTGAGCG--TCCC-GACATGCGG----TGGTG------------------AA----------------TTCA-----…
157	>M01634_72_000000000-C3HGL_1_1113_15735_5961	M01634_72_000000000-C3HGL_1_1113_15735_5961	TGCAGA-ATCCCGTGAACCTGGGTGTC---ACAAAT----CGTCG--------T-----------CC---------------------CC---C------CATC--CTCT-----C-----------------------GAG---GAT----------------A-TGGGACG----GAAGCTGATC-GCCCGTGTG----T---TACCG-CACGCGGTTGGCCAAAAT----CCGAGCTA-AGGACG-TCAGGAGCG--TCTT-GACATGCGG----TGGTG------------------AA----------------TTTA--------------------ATT-----------------CTCG-------TCATAT---AG--TCA---GACGT-…
639	>M01634_72_000000000-C3HGL_1_1113_15852_16866	M01634_72_000000000-C3HGL_1_1113_15852_16866	TGCAGAATCCCGTGAACGCA-AGTTGCG-------------CCCCAAGCC-TTCTGGCCGAGGGCACGTCTGCCTGGGTGTC---ACAAAC----CGTCG-------T-C----------CC---------------------TC---C------CATC--CT-T-----C-----------------------TCA---GAT----------------A-TGGGACG----GAAACTGGTC-TCCCGTGTG----T---TACCG-CACGCGGTTGGCCAAAAT----CCGAGCTA-AGGGCG-CCTAGAGCG--TCAC-GACATGCGG----TGGTG------------------AA----------------CTAA--------------------A…
202	>M01634_72_000000000-C3HGL_1_1113_16247_12164	M01634_72_000000000-C3HGL_1_1113_16247_12164	TGCAGAATCCCGTGAACCATCGAGTCTTTGAACGCA-AGTTGCG-------------CCCCAAGCC-TTCTGGCCGAGGGCACGTCTGCCTGGGTGTC---ACAAAT----CGTCG-------T------------CC---------------------CC---C------CATC--CTCT-----C-----------------------GAG---GAT----------------A-TGGGACG----GAAGCTGATC-TCCCGTGTG----T---TACCG-CACGCGGTTGGCCAAAAT----CCGAGCTA-AGGGCG-CCTAGAGCG--TCAC-GACATGCGG----TGGTG------------------AA----------------CTAA-----…
333	>M01634_72_000000000-C3HGL_1_1113_17223_16324	M01634_72_000000000-C3HGL_1_1113_17223_16324	TGCAGAATCCCGTGAACCATCGAGTCTTTGAACGCA-AGTTGCA-------------CCCCAAGCC-TTCTGGCCAAGGGCACGTGTGCCTGGGTGTC---ACAAAT----CGTCG----------------------------------------------------------------------------------------------------------------------------------------------------TGTG----T---TACCG-CACGCGGTTGGCCAAAAT----CCGAGCTA-AGGACG-CCAGGAGCG--TTCT-TACATGCGG----TTTTG------------------AA----------------TTCA-----…
650	>M01634_72_000000000-C3HGL_1_1113_17266_8522	M01634_72_000000000-C3HGL_1_1113_17266_8522	TGCAGAATCCCGTGAACCATCGAGTCTTTGAACGCA-AGTTGCG-------------CCCCAAGCC-CTCTGGCCGAGGGCACGTCTGCTTGGGTGTC---ACAAAT----CGTCG--------------------TC---------------------CC---C------CATC--CTCT-----C-----------------------GAG---GAT----------------A-TGGGACA----GAAGCTGATC-TCCCTTGTG----T---TACCG-TACGCTGTTGGCCAAAAT----CCGAGCTA-AGGACG-CCAGGAGTG--TCTT-GACATGCGG----TGGTG------------------AA----------------TTCA-----…
671	>M01634_72_000000000-C3HGL_1_1113_19257_11493	M01634_72_000000000-C3HGL_1_1113_19257_11493	TGCAGAATCCCGTGAACCATCGAGTCTTTGAACGCA-AGTTGCG-------------CCCCAAGCC-TTCTGGCCGAGGGCACGTCTGCCTAAGTATC---ACAAAT----CATCG-------------------TCC---------------------CC---C------CATC--CTCT-----T-----------------------GAG---GAT----------------A-TGGGATG----GAAGCTGATC-TCCCGTGTG----T---TACCG-CACGCGGTTGGCCAAAAT----CCGAGCTA-AGGACG-TCAGGAGCG--TCTT-AACATGCGG----TGGTG------------------AA----------------TTTA-----…
666	>M01634_72_000000000-C3HGL_1_1113_20185_27865	M01634_72_000000000-C3HGL_1_1113_20185_27865	TGCAGAATCCCGTGAACCATCAAGTCTTTGAACGCA-AGTTGCG-------------CCCCAATCC-TTCTGGCCGAGGGCACGTCTGCTTGGGTGTC---ACAAAT----CGTCG-------------------T-C---------------------CC---C------CATC--CTCT-----C-----------------------GAG---GAT----------------A-TGGGACG----GAAGCTGATC-TCCCGTGTG----T---TACCG-CACGCGGTTGGCCAAAAT----CCAAGCTA-GGGACG-CCAGGAGCA--TCTT-GACATGCGG----TGGTG------------------AA----------------TTCA-----…
347	>M01634_72_000000000-C3HGL_1_1113_20703_27419	M01634_72_000000000-C3HGL_1_1113_20703_27419	GGGGGGGGGGGGGGGGGGGGGGGGGGGGGGGACGCA-AGTTGCG-------------CCCCAAGCC-TTCTGGCCGAGGGCACGTCTGCCTGGGTGTC---ACAAAT----CGTCG-------------------TCC---------------------CC---C------CATC--CTCT-----C-----------------------GAG---GAT----------------A-TGGGACG----GAAGCTGATC-TCCCGTGTG----T---TACCG-CACGCGGTTGGCCAAAAT----CCGAGCTA-AGAACG-TCAGGAGCG--TCTT-GACATGCGG----TGGTG------------------AA----------------TTTA-----…
38	>M01634_72_000000000-C3HGL_1_1113_21343_4386	M01634_72_000000000-C3HGL_1_1113_21343_4386	TGCAGAATCCCGTGAACCATCGAGTCTTTGAACGCA-AGTTGCG-------------CCCGAAGCC-ATTAGGCCGAGGGCACGTCTGCCTGGGCGTC---ACACGT----CGTTG------CCCC----------CC---------------------CC----------CAAC-CCCCT-----C-----------------------GGG---AGT-----TG--------GA-TGGGACG----GATGATGGCC-TCCCGTGTG----C---TCAGT-CACGCGGTTGGCATAAAT---ACCAAGTCC-TCGGCG---ACCAACG--CCAC-GACAATCGG----TGGTTG---------------TCAA------------A-CCTCGG-----…
284	>M01634_72_000000000-C3HGL_1_1113_22023_11897	M01634_72_000000000-C3HGL_1_1113_22023_11897	TGCAGAATCCCGTGAACCATCGAGTCTTTGAACGCA-AGTTGCG-------------CCCGAAGCC-ATTAGGCCGAGGGCACGCCTGCCTGGGTGTT---GCACAT----CGTTG--------------------CC---------------------CC---C---GTGCCTTGGCCAC-----GT-----------------------------------------------G-C----C---------TTGGCT-TCCCGCGAG----C---AATGT-CTCACGGTTGGTTGAAAA----CTGAGTCC-GCGGTG---GAGGGCG--CCGT-GATGGATGG----TGGCTGAGTTAAAGCTCGAGACCGA-----------------TCG-----…
297	>M01634_72_000000000-C3HGL_1_1113_22687_15831	M01634_72_000000000-C3HGL_1_1113_22687_15831	TGCAGAATCCCGTGAACCATCGAGTCTTTGA---ACGCA---AGTTGCG--------------------CC---------------------CG---A------CGCCCAATTT-----------------------------------GGT----------------G-CGGGGCG----GATAATGGCA-TCCCGTTAG----------------CTCGGTTTGCCCAAAA----ATGATCCC-TCATCG---ACGGATG--TCAC-AACCAGTGG----TGGTTGAA---------------AG----------------ATCA--------------------TTGGTGTCGTTGTGCTTCACTCTG-------TCGCAT---GC--TTGGGCAT…
800	>M01634_72_000000000-C3HGL_1_1113_25031_5634	M01634_72_000000000-C3HGL_1_1113_25031_5634	TGCAGAATCCCGTGAACCATCGTGTCTTTGAACGCA-AGTTGCG-------------CCCCAAGCC-TTCTGGCCGAGGGCACGTCTGCCTGGGTGTC---ACAAAT----CGTTG-------------------TCC---------------------CC---C------CATC--CTCT-----C-----------------------GAG---GAT----------------A-CGGGACG----GAAGCTGATC-TCCCGTGTG----T---TACCG-CACGCGGTTGGCCAAAAT----CCAAGCTA-AGGACG-TCAGAAGCG--TCTT-GACATGCGG----TGGTG------------------AA----------------TTTA-----…
744	>M01634_72_000000000-C3HGL_1_1113_26837_12778	M01634_72_000000000-C3HGL_1_1113_26837_12778	TGCAGAATCCCGTGAACCATCTAGTCTTTGAACGCA-AGTTGTG-------------CCCCAAGCC-TTTTGGCCGAGGGCACGTCTGCCTGAGTGTC---ACAAAT----CGTCG-------T------------CC---------------------CC---C------CATC--CTCT-----C-----------------------GAG---GAT----------------A-TGGG-CG----GAAGCTGATC-TCCCGTGTG----T---TACCG-CACGCGGTTGGCCAAAAT----CCTAGCTA-AGGATG-TCAGGAGCG--TCTT-GACATGCGG----TGGTG------------------AA----------------TTCA-----…
302	>M01634_72_000000000-C3HGL_1_1113_27534_14329	M01634_72_000000000-C3HGL_1_1113_27534_14329	TGCAGAATCCCGTGAACCATCGAGTCTTTGAACGTA-AGTTGCA-------------CCCCAACCC-TTCTGGCCGAGGGCAAGTCTTCCTGGGTGTC---ACAAAT----CATCC--------T-----------CC---------------------CC---C------CATC--CTCT-----C-----------------------GAG---GAT----------------A-TGGGACG----GAAGCTGATC-TCCCGTGTG----T---TACCG-CACACGGTTGGCCAAAAT----CCGAGCTA-AGGACG--------------------------------------------------------------------------------…
26	>M01634_72_000000000-C3HGL_1_1113_28406_20152	M01634_72_000000000-C3HGL_1_1113_28406_20152	TGCAGAATCCAGTGAACCATCGAGTCTTTGAACGTA-AGTTACG-------------CCCGAAGTC-GTTAGGCCAAGGCCACGTCTGCCTGGGCGTC---ATACGT----CGTTG--------------------CC---------------------CC---C----CTCAACCCTTCA-----------------------------GGGGCCGGG------------------TGGGACG----AATGATGGCCTTCCCGTGTG--------CCCTGTCACGCGGTTGGCATAAAT---ACCGAGTCC-TCGGCG---ACCGGCG--CCGC-AACAATCAG----TGGTTGTC---------------AA-------------ACCTCGG-----…
428	>M01634_72_000000000-C3HGL_1_1113_28620_15438	M01634_72_000000000-C3HGL_1_1113_28620_15438	TGCAGAATCCCGTGAACCATCGAGTCTTTGAACGCA-AGTTGCG-------------CCCCAAGCC-TTCTGGCCGAGGGCACGTCTGCCTGGGTGTC---ACAAAT----CGTCG-------T------------CC---------------------CC---C------CATC--CTCT-----C-----------------------GAG---GAT----------------A-TGGGACG----GAAGCTGATC-TCCCGTGTG----T---TACCG-CACACGGTTGGTCAAAAT----CCGAGCTA-TGGACG-CCAGGAGCG--TTTT-GACATGTGG----TGGGG------------------AA----------------TTCA-----…
99	>M01634_72_000000000-C3HGL_1_1113_29176_16087	M01634_72_000000000-C3HGL_1_1113_29176_16087	TGCAGAATCCCGTGAACCATCGAGTCTTTGAACGCA-AGTTGCG-------------CCCCAAGCC-TTCTGGCCGAGGGCACGTCTGCCTGGGTGTC---ACAAAT----CGTCG-------------------TCC---------------------CC---C------CATC--CTCT-----C-----------------------GAG---GAT----------------A-TGGGACG----GAAGCTGATC-TCCCGTGTG----T---TACCG-CACGCGGTTGG------------C---C-A-A-AA---TCAGGAGCG--TCTT-GACATGCGG----TGGTG------------------AA----------------TTTA-----…
794	>M01634_72_000000000-C3HGL_1_1113_4668_20065	M01634_72_000000000-C3HGL_1_1113_4668_20065	TGCAGAATCCCGTGAACCATCGAGTCTTTGAACGCA-AGTTGCG-------------CCCCAAGCC-TTCTGGCCGAGGGCACGTCTGCCTGGGTGTC---ACAAAT----CGTCG-------------------TCC---------------------CC---C------CATC--CTCT-----C-----------------------GAG---GAT----------------A-TGGGACA----GAAGCTGATC-TCCCGTGTG----T---TACCG-CACGCGGTTGGCCAAAAT----CCGAGCTA-AGGACG-TCAGAAGCG--TCTT-AACTTGCGG----TGGTG------------------AA----------------TTTA-----…
384	>M01634_72_000000000-C3HGL_1_1113_7783_6876	M01634_72_000000000-C3HGL_1_1113_7783_6876	TGCAGAATCCCGTGAACCATCGAGTCTTTGAACGCA-AGTTGCG-------------CCTGATGCC-ATTAGGTTGAGGGCACGTCTGCCTGGGCGTC---ACATAT----CGAAG--------------------CC---------------------TC---C---TGCCAATTTCCCT-----TTGA--------------------T-----TAT-------------TGTG-CAGGGTGG----ATGTTGGCC-TCCCGTGAG----CAC-CATCGCCTCATGGTTGGTTGAAAA----TCGAGACC-TTGGTA-----GAGTGTGCCAT-GATAAATGG----TGCATGTGTTAAGCACGAGACCAAA-------------------------…
293	>M01634_72_000000000-C3HGL_1_1113_8429_12035	M01634_72_000000000-C3HGL_1_1113_8429_12035	TGCAGAATCCCGTGAACCATCGAGTCTTTGAACGCA-AGTTGCG-------------CCCGAAGCC-ATTAGGCCGAGGGCACGCCTGCCTGGGTGTT---GCACAT----CGTTG--------------------CC---------------------CC---C---GTGCCTTGGCCAC-----GTGCC-------------------AGG---CAC-----------CA--AG-CGGGGCG----AA---T-G-T-T-----G-G----C-----T-T-CTCACGGTTGGTTGAAAA----CTGAGTCC-GCGGTG---GAGGGCG--CCGT-GATGGATGG----TGGCTGAGTTAAAGCTCGAGACCGA-----------------TCG-----…
346	>M01634_72_000000000-C3HGL_1_1113_8678_19265	M01634_72_000000000-C3HGL_1_1113_8678_19265	TGCAGAATCCCGTGAACCATCGAGTCTTTGAACGCA-AGTTGCC-------------CCCCAAGCC-GTCTGGCCGAGTGCACGTCTGCCTGGGTGTC---ACAAAT----CGTCG-------------------TCC---------------------CC---C------CATC--CTCT-----C-----------------------GAG---GAT----------------A-TGGGACG----GAAGCTGATC-TCCCGTGTG----T---TGCCG-CACGCGGTTAGCCAAAAT----CCAAGCTA-TGGACG-TCAGGAGCG--TCTT-GACATGCGG----TGGTG------------------AA----------------TTTA-----…
408	>M01634_72_000000000-C3HGL_1_1113_8897_11304	M01634_72_000000000-C3HGL_1_1113_8897_11304	TGCGGAATCCCGTGAACCATCGAGTCTTTGAACGCA-AGTTGCG-------------CCCCAAGCC-TTCTGGCCGAGGGCACGTCTGCCTGGGTGTC---ACAAAT----CGTCG-------------------TCC---------------------CC---C------CATC--CTCT-----T-----------------------GAG---GAT----------------A-TGGGACG----GAAGCTGATC-TCCCGTGTG----T---TCCCG-CACGCGGTTGGCCAAAAT----CCGAACAA-AGGACG-TCAGGAGCG--TTTT-GACATGCGG----TGGTG------------------AA----------------TTTA-----…
581	>M01634_72_000000000-C3HGL_1_1113_9594_15884	M01634_72_000000000-C3HGL_1_1113_9594_15884	TGCAGAATCCCGTGAACCATCGAGTCTTTGAACGCA-AGATGCG-------------CCCGAAGCC-ATTAGGCCTAGGGAACACCTGCCTGGGTGTT---GCACAT----CGTTG--------------------CC---------------------CC---C---GTGCCTTGGCCAC-----CTGCC-------------------AGG---CAC-----------CA--AG-CGGGGCG----AATGTTGGCT-TCCCGCGAG----C---AATGT-CTCACGGTTGGTTGAAAA----CTGAGACC-GCGGTG---GAGGGCG--CCAT-GATGGATGG----TGGCTGACTTAAAACTCGAGACCGA-----------------TCG-----…
665	>M01634_72_000000000-C3HGL_1_1114_13937_5646	M01634_72_000000000-C3HGL_1_1114_13937_5646	TGCAGAATCCCGTGAACCATCGAGTCTTTGAACGCA-AGCTGCG-------------CCCCAAGCC-TTCTGGCCGAGGGCACGTCTGCCTGGGTGTC---ACAAAT----CATCG----------------T---CC---------------------CC---C------CATC--CTCT-----C-----------------------GAG---GAT----------------A-TGGGATG----GAAGCTGATC-TCCCATGTG----T---TACCG-CATGCGGTTGGCCAAAAT----CCTAGCTA-AGGACG-TTAGGAGCG--TCTT-GACATGCGG----TGGTG------------------AA----------------TTCA-----…
176	>M01634_72_000000000-C3HGL_1_1114_15395_12388	M01634_72_000000000-C3HGL_1_1114_15395_12388	TGCAGAATTCCGTGAACCATTGAGTCTTTGAACGCA-AGTTTCG-------------CCCCAAGCC-TTCTGGCCGAGGGCACGTCTGCCTGGGTGTC---ACAAAT----CGTCG--------T-----------CC---------------------CC---C------CATC--CTCT-----C-----------------------CAG---GAT----------------A-TGGGATG----CAAGCTGATC-TCCTGTGTG----T---TACCG-CACGCGGTTGGCCACAAT----CCGAGCTA-AGGACG-CCAGGAGGG--TCTT-GACATGCTG----TGGTG------------------AA----------------TTCA-----…
529	>M01634_72_000000000-C3HGL_1_1114_16048_18367	M01634_72_000000000-C3HGL_1_1114_16048_18367	TGTAGAATCCCGTGAACCATCGAGTCTTTGAACGCA-AGTTGCG-------------CCCGAAGCC-TTCTGGTTGAGGGCACGTCTGCCTGGGCGTC---ACGCAT--CGCATCG-----CA-------------TC---------------------CC---A---ACTCGTCCCCTTC-----------------------------GGGAGTGAT-------------AGAGTGGGATCA----GATATTGGTC-CCCCGTGCG--------CACCAGCGCGCGGTCGGCCTAAAT----GCGAACCC-GCGGCG---ACTCGCG--TCGC-GACAAGTGG----TGGTT------------------GA------------ACTCTCAA-----…
570	>M01634_72_000000000-C3HGL_1_1114_17518_11140	M01634_72_000000000-C3HGL_1_1114_17518_11140	TGCAGAATCCCGTGAACCATCGAGTCTTTGAACGCA-AGTTGCG-------------CCCCAAGCC-TTCTGGCCGAGGGCACGTCTGCCTGGGTGTC---ACAAAT----CGTCG-------T------------CC---------------------CC---C------CATC--CTCT-----C-----------------------GAG---CAT----------------A-TGGGACG----GAAGCTGATC-TCATGTGTG----C---TACCG-CACGCGGTTGGCCAAAAT----CCGTGCTA-AGGACG-CAAGGAGCG--TCTT-AACATGCGG----TGGTG------------------AA----------------TTCA-----…
191	>M01634_72_000000000-C3HGL_1_1114_19111_7784	M01634_72_000000000-C3HGL_1_1114_19111_7784	TGCAGAATCCCGTGAACCATCGAGTCTTTGAACGTA-AGTTGCG-------------CCCGAAGCC-ATTAGGCCGAGGGCACGCCTGCTTGGGCGTC---ACACGC----CGTTG--------CC----------CC---------------------CC---G------CACC-TCCCT-----C-----------------------GGG---AGC-----GT----T----G-GGGGGCG----GACGATGGAC-TCCCGTGCG----T---CACCC-CGCGCGGTTGGCATAAAT---GCCGAGTCC-TCGGCG---ACGAACG--CCAC-GACAATCGG----TGGTTG---------------TCAA------------A-CCTCGG-----…
588	>M01634_72_000000000-C3HGL_1_1114_20254_7002	M01634_72_000000000-C3HGL_1_1114_20254_7002	TGCAGAATCCCGTGAACCATCGAGTCTTTGAACGCA-AGTTGCG-------------CCCCAAGCC-TTCTGGCCGAGGGCACGTCTGCCTGGGTGTC---ACAAAT----CGTCG--------------------T----------------------CC---C------CCCATCCTCT-----C-----------------------GAG---GAT----------------A-TCGGACG----GAAGCTGGTC-TCCCGTGTG----T---TACCG-CACGCGGTTGGCCAAAAT----CCTAGCTA-AGGATG-CCAGGAGCG--TCTC-GACATGCGG----TGGTG------------------AA----------------TTCA-----…
736	>M01634_72_000000000-C3HGL_1_1114_23423_13774	M01634_72_000000000-C3HGL_1_1114_23423_13774	TGCAGAATGCCATGAACCATCGAGTCTTTGAACGCA-AGTTGCG-------------CCCCAAGCC-TTCTGGCCGAGGCCACGTCTGCCTGAGTGTC---ACAAAT----CGTCG--------T-----------CC---------------------CC---C------CATC--CTCT-----T-----------------------GAG---GAT----------------A-TGGGACG----GAAGCTTATC-TCCCGTGTG----T---TCCCG-CACGCGGTTGGCCAAAAT----CCGAGCAA-AGGACG-TCAGGAGCG--TCTT-GACATGCGG----TGGTG------------------AA----------------TTTA-----…
76	>M01634_72_000000000-C3HGL_1_1114_24583_20775	M01634_72_000000000-C3HGL_1_1114_24583_20775	TGCAGAATCCCGTCAACCATCGAGTCTTTGAATGCA-AGTTGCG-------------CCCCAAGCC-TTCTGGCCGAGGGCACGTCTGCTTGGGTGTT---ACAAAT----CGTCG--------T-----------CC---------------------CC---C------CATC--CTCT-----C-----------------------GAG---GAT----------------A-TGGGACG----GAAGCTGATC-TCCTGTGTG----T---TACCG-CACGTGGTTGGCCAAAAT----CCGAGCTA-AGGACG-CCAGGAGCG--TCTT-GACATGCGG----TGGTG------------------AA----------------TTCA-----…
521	>M01634_72_000000000-C3HGL_1_1114_25395_14920	M01634_72_000000000-C3HGL_1_1114_25395_14920	TACAGAATCTCGTGAATCACCGAGTCTTTGAACGCA-AGTTGCG-------------CCCAAAGCC-TTTAGGCTGAGGGCACGTCTGCCTGGGTATC---ATGTAT--CCCGTCG-----CAC------------CC---------------------CT---A---ACCCGTCCCAACT-----C-----------------------GGGTATGAT-----------GGCTGGTGGGAGCA----GATATTGGCC-TCCCGTGTA--------CTCGC-GTTATGGTTTGTCTAAAA----TCGAGCCC-CGAGTG---ACGAACG--CCAC-GACAAATGG----TGGTC------------TGTAATAG------------CTATTTCA-----…
799	>M01634_72_000000000-C3HGL_1_1114_28898_11498	M01634_72_000000000-C3HGL_1_1114_28898_11498	TGCAGAATCCCGTGAACCATCGAGTCTTTGAACGCA-AGTTGCG-------------CCCCAACCC-TTCTAGCCGAGGGCACGTCTGCCTGGGTGTC---AAAAAT----CTTCA--------T-----------CC---------------------CC---C------CATC--CTCT-----C-----------------------GAG---GAT----------------A-GGGGACG----GAAGCTGATC-TCCCGTGTG----T---TACCG-CACGTGTTTGGCAAAAAT----CCGAGCTA-AGGATT-CCAGGAGCA--TCTT-GACATGCGG----TGGTG------------------AA----------------TTCA-----…
44	>M01634_72_000000000-C3HGL_1_1114_4926_17197	M01634_72_000000000-C3HGL_1_1114_4926_17197	TGCAGAATCCCGTGAACCATCGAGTCTTTGAACGCA-AGTTGCG-------------CCCGATGCC-ATTAGGTTGAGGGCACGTCTGCCTGGGTGTC---ACATAT----CGAAG--------------------CC---------------------CT----------TCCCCAAATT-----------------------------AAACTTGGT---------------GTGCAGGGTG----AATGATGGCT-TCCCGTGAG-----CCATTTGGTCTCATGGTTGGCTGAAAA----TTGAGACC-TTGGCA---GGGTGTG--CCAT-GATTAATGG----TGGTTGTGTGACGCACGAAGCCCATA------TGCGTAATGTTAC-----…
286	>M01634_72_000000000-C3HGL_1_1114_5353_20941	M01634_72_000000000-C3HGL_1_1114_5353_20941	TGCAGAATCCCGTGAACCATCGAGTCTTTGAACGCA-AGTTGCG-------------CCTGAAGCC-ATTAGGCCGAGGGCACGCTTGCCTGGGTGTT---GCACAT----CATTG--------------------CC---------------------CC---C---ATGCCTTGGCCAC-----GTGCC-------------------AGG---CAC-----------CA--AG-CGGGGCG----AATGTTGGCT-TCCCGCGAG----C---AATGT-CTCACGGTTGGTTGAAAA----CTGAGTCC-GTGGTG---GAGGGCG--CCGT-GATGGATGG----TGGTTGAGTTAAAGCTCGAGACCGA-----------------TCG-----…
571	>M01634_72_000000000-C3HGL_1_1114_5629_17339	M01634_72_000000000-C3HGL_1_1114_5629_17339	TACAGAATCCCGTGAACCATCGAGTCTTTAAAAGCA-AGATGCG-------------CCCCAAGCC-TTCTGGCCGAGGGCACGTCTGCCTGGGCGTC---ACAAAT----CGTCG--------T-----------CC---------------------CC---C------CATC--CTCT-----C-----------------------GAG---GAT----------------A-TGGGACG----GAAGCTGATC-TCCCGTGTG----T---TACCG-CATGCGGTTGGCCAAAAT----CCAAGC-A-AGGACG-TCAGGAGCG--TCTT-GACATGCGG----TAGTG------------------AA----------------TTTC-----…
370	>M01634_72_000000000-C3HGL_1_1114_7554_24567	M01634_72_000000000-C3HGL_1_1114_7554_24567	TGCAGAATCCCGTGAACCATCGAGTCTTTGAACGCA-AGTTGCG-------------GCCGAAGCC-ATTTGGTTGAGGCCACGTCTGCCTGGGCGTC---ACGCAT--CGCGTCG-----CAAC-----------CG---------------------GC---C---CAAATCCACCTCT-----C-----------------------GGT---GATTTGAACT-----------GGGCGCG----GATATTGGCC-CACCGTTTG--------CGCAAGCGCGCGGTCGGCCTAAAC----ACGAACCC-GAGGCG---GCTCGCG--TCAC-GACAAGTGG----TGGTT------------------GA------------GCACTCAA-----…
181	>M01634_72_000000000-C3HGL_1_1114_7767_5276	M01634_72_000000000-C3HGL_1_1114_7767_5276	TGCAGAATCCCGTGAACCATCGAGTCTTTGAACGCA-AGTTGCG-------------CCCGATGCC-ATTAGGTTGAGGGCACGTCTGCCTGGGTGTC---ACATAT----CGAAG--------------------CC---------------------CT----------TCCCCAAATT-----------------------------AAACTTGGT---------------GTGCAGGGTG----AATGATGGCT-TCCCGTGAG-----CCATTTGGTCTCATGGTTGGCTGAAAA----TTGAGACC-TTGGCA---GGGTGTG--CCAT-GATTAATGG----TGGTTGTGTGACGCACGAAGCCCAA-------TCATGATCATTGC-----…
177	>M01634_72_000000000-C3HGL_1_1114_7780_12174	M01634_72_000000000-C3HGL_1_1114_7780_12174	TGCAGAATCCCGTGAACCATCGAGTCTTTGAACGCA-AGTTGCG-------------CCCCAAGCC-TTCTGGCCGAGGGCACGTCTGCCTGGGTGTC---ACAAAT----CGTCG-------------------TCC---------------------CC---C------CATC--CTCT-----C-----------------------GAG---GAT----------------A-TGGGACG----GAAGCTGATC-TCCCGTGTG----T---TACCG-CACGCGGTTGGCCAAAAT----CCGAGCTA-AGCACG-CCAGGAGCG--TCTT-TACATGCGG----TGGTG------------------AA----------------TTCA-----…
354	>M01634_72_000000000-C3HGL_1_1114_9214_14066	M01634_72_000000000-C3HGL_1_1114_9214_14066	TGCAGAATCCCGTGAACCATCGAGTCTTTGAACGCA-AGTTGCG-------------CCCCAAGCC-TTCAGGCCGAGGGCACGTCTGCCTGGGTGTC---ACAAAT----CGTCA--------T-----------CC---------------------CC---C------CATC--CTCA-----C-----------------------GAG---GAT----------------A-TGGGACG----GAAGCTGATC-TCCCGTGTG----T---TACCG-CACGCGGTTGGCCAAAAT----CCGAGCTA-AGGACG-CCAGGAGCG--TTTT-GACATGTGG----TGGTG------------------AA----------------TTCA-----…
677	>M01634_72_000000000-C3HGL_1_1114_9821_7116	M01634_72_000000000-C3HGL_1_1114_9821_7116	TGCAGAATCCCGTGAACCATCGAGTCTTTGAACGCA-AGTTGCG-------------CCCGAAGCC-GTTAGGCCAAGGGCACGTCTGCCTGGGCGTC---ACACGT----CGTTG--------------------CC---------------------CC---C---C--CGAC-CCCTT-----C-----------------------GGG---GGT-----------CG--GA-CGGGACG----GATGATGGCCTTCCCGTGTG--------CCCCGTCACGCGGTTGGCATAAAT---ACCGAGTCC-TCGGCG---ACCGGCG--CCGC-AACAATCAG----TGGTTGT----------------CA------------AACCTCGG-----…
584	>M01634_72_000000000-C3HGL_1_2101_10567_27738	M01634_72_000000000-C3HGL_1_2101_10567_27738	TGCAGAATCCCGTGAACCATCGAGTCTTTGAACGCA-AGTTGCG-------------CCCGAAGCC-TTCTGGCCAAGGGCACGTCTGCCTGGGTGTC---ACAAAT----CGTCG--------T-----------CC---------------------CC---C------CATC--CTCT-----C-----------------------GAG---GAT----------------A-TGGGATG----GAAGCTGATC-TCCCGTGTG----T---TACCG-CACGCGGTTGGCCAAAAT----CCGAGCTA-AGGACG-CCAGGAGCG--CCTT-GACATCCGG----TGGTG------------------AA----------------TTCA-----…
775	>M01634_72_000000000-C3HGL_1_2101_10796_12548	M01634_72_000000000-C3HGL_1_2101_10796_12548	GGGGGGGGGGGGGGGGGGGGGGGGGGGGGGGGCGGG-GGTGGCG-------------CCCCAAGCC-TTCTGGCCAAGGGCACGTCTGCCTGGGTGTC---ACAAAT----CGTCG-------------------TCC---------------------CC---C------CATC--CTCT-----C-----------------------GAG---GAT----------------A-TGGGACG----GAAGCTGATC-TCCCGTGTG----T---TACCG-CACGCGGTTGGCCAAAAT----CCGAGCTA-AGAACG-TCAGGAGCG--TCTT-GACATGCGG----TGGTG------------------AA----------------TTTA-----…
145	>M01634_72_000000000-C3HGL_1_2101_12768_10801	M01634_72_000000000-C3HGL_1_2101_12768_10801	TGCAGAATCCCGTGAAC----------------GCA-AGTTGCG-------------CCCCAAGCC-TTCTGGCCGAGGGCACGTCTGCCTGGGTGTC---ACAAAT----CGTCG--------------------TC---------------------CC---C------CATC--CTCT-----C-----------------------GAG---GAT----------------A-TGGGATG----GAAGCTGATC-TCCCGTGTG----T---TACCG-CACGCGGTTGGCCAAAAT----CCGAGCTA-AGGACG-TCAAGAGCG--TCTT-GACATGCGG----TGGTG------------------AA----------------TTTA-----…
439	>M01634_72_000000000-C3HGL_1_2101_13749_28188	M01634_72_000000000-C3HGL_1_2101_13749_28188	TGCAGAATCCCGTGAACCAACGAGTCTTTGAACGCA-AGTTGCA-------------CCCCAAACC-TTCTGGCCAAGGGCACGTCTGCCTGGGTGTC---ACAAAT----CGTCGA-------C-----------CC---------------------CC---C------CATC--CTCT-----C-----------------------GAG---GAT----------------A-TGGGACG----GAAGCTGATC-TCCCGTGTG----T---TACCG-CACGCAGTTGGCCAAAAT----CCAAGCTA-AGGACG-TCAGAAGCG--TCTT-GACATGCGG----TGGTG------------------AA----------------TTTA-----…
685	>M01634_72_000000000-C3HGL_1_2101_15970_15827	M01634_72_000000000-C3HGL_1_2101_15970_15827	TGCAGAATCCCGTAAACCATCGAGTCTTTGAACGCA-AGTTGCG-------------CCCCAAGCC-TTCTGGCCAAGGGCACGTCTGCCTGGGTGTC---ACAAAT----CGTCG-------------------TCC---------------------CC---C------CATC--CTCT-----C-----------------------GAG---GAT----------------A-TGGGACG----GAAGCTGATC-TCCCGTGTG----T---TACCG-CACGCGGTTGGCCAAAAT----CCGAGCTA-AGAACG-TCAGGAGCG--TCTT-GACATGCGG----TGGTG------------------AA----------------TTTA-----…
739	>M01634_72_000000000-C3HGL_1_2101_16004_24307	M01634_72_000000000-C3HGL_1_2101_16004_24307	TGCAGAATCCTGTGAACCATCGAGTCTTTGAACGCA-AGTTGCG-------------CCCCAAGCC-TTCTGGCCAAGGGCACGTCTGCCTGGGTGTC---ACAAAT----CGTCG-------------------TCC---------------------CC---C------CATC--CTCT-----C-----------------------GAG---GAT----------------A-TGGGATG----GAAGCTGATC-TCCCGTGTG----T---TACCG-CACGCGGTTGGCCAAAAT----CCAAGCTA-AGGACA-TCAGAAGCG--TCTT-GACATGCGG----TGGTG------------------AA----------------TTTA-----…
697	>M01634_72_000000000-C3HGL_1_2101_16036_26995	M01634_72_000000000-C3HGL_1_2101_16036_26995	TGCAGAATCCCGTGAACCATCGAGTCTTTGAACGCA-AGTTGCG-------------CCCGAAGCC-GTTAGGCCAAGGGCACGTCTGCCTGGGCGTC---ACACGT----CGTTG--------------------CC---------------------CC---C---C--CTAC-CCCTT-----C-----------------------GGG---GGT-----------CG--GA-CGGGACG----GATGATGGCCTTCCCGTGTG--------CCCCGTCACGCGGTTGGCATAAAT---ACCGAGTCC-TCGGCG---AACGGCG--CCGC-GACGAACGG----TGGTTGT----------------CA------------AACCTCGG-----…
566	>M01634_72_000000000-C3HGL_1_2101_18755_11387	M01634_72_000000000-C3HGL_1_2101_18755_11387	TGCAGAATCCCGTGAACCATCGAGTCTTTGAACGCA-AGTTGCG-------------CCCCAAGCC-TTCTGGCCGAGGGCACGTCTGCTTGGGTGTC---ACAAAT----CGTCG-------T------------CC---------------------CC---C------CATC--CTCT------------------------------AG---GAT----------------A-TCGGACG----GAAGCTGGTC-TCCCGTGTG----T---TACCG-CACGCGGTTGGCCAAAAT----CCTAGCTA-AGGATG-CCAGGAGCG--TCTT-GACATGCGG----TGGTG------------------AA----------------TTCA-----…
310	>M01634_72_000000000-C3HGL_1_2101_18805_14619	M01634_72_000000000-C3HGL_1_2101_18805_14619	TGCAGAATCCCGTGAACCATCGAGTCTTTGAACGCA-AGTTGCG-------------CCCCAAGCC-TTCTGGCCAAGGGCACGTCTGCCTGGGCGTC---ACACGT----CGTTG--------CC----------CC---------------------CC----------CAAC-CCCCT-----C-----------------------GGG---AGT-----TG--------GA-TGGGACG----GATGATGGCC-TCCCGTGTG----C---TCAGT-CACGCGGTTGGCATAAAT---ACCAAGTCC-TCGGCG---ACCAACG--CCAC-GACAATCGG----TGGTTA---------------TCAA------------A-CCTCGG-----…
667	>M01634_72_000000000-C3HGL_1_2101_19145_14173	M01634_72_000000000-C3HGL_1_2101_19145_14173	TGC-AGAATCC-------------CGTGAACCA-TCGAGTCTTTGAACGCAAGTTGCGCCCCAAG---CCTTCT----GGCCGA------------------GGG---------------------CA---C------GTTT--ACCT-----C-----------------------AAG---GAT----------------A-TGGTACG----GAAGCTGATC-TCCCGTGTG----T---T-CCG-CACGCGGTTGGCCAAAAT----CCGAGCTA-AGAACG-TCAGGAGCG--TCTT-GACATGCGG----TGGTG------------------AA----------------TTTA--------------------ATT---------------…
383	>M01634_72_000000000-C3HGL_1_2101_20040_22817	M01634_72_000000000-C3HGL_1_2101_20040_22817	TGCAGAATCCCGTGAACCATCGAGTCTTTGAACGCA-AGTTGCG-------------CCCGAAGCC-ATTAGGTTAAGGGCACGTCTGCCTGGGTGTC---ACGCAT----CGTTG--------------------CC---------------------CC---C------GCTCCCCTCGGCTCAC-----------------------GAG---GGC------------------GGGGGCG----GATACTGGTC-TCCCGCGCG----C---TCCCG-CCCGTGGTTGGCCTAAAA----TCGAGTCC-CCGGCG---ACGGTCG--CCAC-GACAAGCGG----TGGTTGAG---------------AG-------------------------…
585	>M01634_72_000000000-C3HGL_1_2101_20147_3175	M01634_72_000000000-C3HGL_1_2101_20147_3175	TCCAGAATCCCATGAAGCATCGAGTCTTTGAATGCA-AGTTGGG-------------CCCGAAGTC-ATTAGGCCAATGGCACGTCTGCCTGGGCGTC---ACACGT----CGTTG---------C----------CC---------------------CC---T------CGAC-CCCTT-----C-----------------------TGG---AGT-----CG--------GG-TAGGATG----GATGG---TC-TCCCGTGCG----C---CA-AT-CACGCGGTTGGTCTAAAT---ATGAAGTCC-CCGGCG---ACCGACG--CCAT-GACAATCGG----TGGTTG---------------TCAA------------A-CCTCGG-----…
404	>M01634_72_000000000-C3HGL_1_2101_23915_25130	M01634_72_000000000-C3HGL_1_2101_23915_25130	TGCAGAATCCCGTGAACCATCGAGTCTTTGAACGCA-AGTTGCG-------------CCCCAAGCC-TTCTGGCCAAGGGCACGTCTGCCTGGGTGTC---ACAAAT----CGTCG-------T------------CC---------------------CC---C------CATC--CTCT-----C-----------------------GAG---GAT----------------A-TGGGACG----GAAGCTGATC-TCCCGTGTG----T---TACCG-CACGCGGTTGGCCAAAAT----CCGAGCTA-AGGACG-TCAGGAGCG--TCTT-GACATGCGG----TGGTG------------------AA----------------TTCA-----…
772	>M01634_72_000000000-C3HGL_1_2101_25499_21472	M01634_72_000000000-C3HGL_1_2101_25499_21472	TGCAGAATCTCGTGAACCATCGAGTCTTTGAACGCA-AGTTGCG-------------CCCCAACCC-TTATAGCCAAGGGCACGTCTGCCTGGGTGTC---ACAAAT----CTTCA--------T-----------CC---------------------CC---C------CATC--CTCT-----C-----------------------GAG---GAT----------------A-GGGGACG----GAATCTGATC-TCCCGTGTG----T---TACCG-CACGTGGTTGGCAAAAAT----CCGAGCTA-AGGATG-CCAGGAGCA--TCTT-GACATGCGG----TGGTG------------------AA----------------TTCA-----…
396	>M01634_72_000000000-C3HGL_1_2101_26981_10356	M01634_72_000000000-C3HGL_1_2101_26981_10356	TGCAGAATCCCGTGAACCATTGAGTCTTTGAACGCA-AGTTGCG-------------CTCGAAGCC-ACTAGGCTGAGGGCACGTCTGCGTGGGTGTC---ACGCAT-CT-AGTTG--------------------CC---------------------CC---C---TTACCAAACTAAT-----CTTCT-------------------AAG---AGATTTTGTCG---GT--TT-GGGGGCG----GAAATTAGCC-TCATGTGC---------CATGT-TGTGCGGTTGGCGTAAAA----TTGAGTCT-ATGGTC---ACGAATA--TCGC-GACAT-CGG----TGGTTGTA-------------AGAA------------GACCTTCT-----…
699	>M01634_72_000000000-C3HGL_1_2101_28728_17438	M01634_72_000000000-C3HGL_1_2101_28728_17438	TGCAGAATCTCGTGAACCATCGAGTCTTTGAAAGCA-AGTTGCG-------------CCCGAAGCC-ATTAGGCTAAGGGCACGTCTTCCTAGGCGTC---ACACAT----CGTTGC-----CCCC----------CC---------------------CC----------CAAC-CCCCT-----C-----------------------GGG---AGT-----TG--------GA-TGGGACG----GATGATGGCC-TCCCGTGTG----C---TCAGT-CACGCGGTTGGCATAAAT---ACCAAGTCC-TCGGCG---ACCAACG--CCAC-GACAATCGG----TGGTTG---------------TCAA------------A-CCTGGG-----…
311	>M01634_72_000000000-C3HGL_1_2101_3986_15539	M01634_72_000000000-C3HGL_1_2101_3986_15539	TGCAGAATCCCGTGAACCATCGAGTCTTTGAACGCA-AGTTGCG-------------CCCCAAGCT-TTCTGGCTGAGGGCACGTCTGCCTGGGTGT-----CAAAT----ATTCG-------------------TCC---------------------CC---C------CATA--CTCT-----C-----------------------GAG---GAT----------------A-GGGGACG----GAAGCTGATC-TCCCGTGTG----T---TTCCG-CACGCGGTTGGCCAAAAT----CCGAGCTA-AGGACG-TCAGGAGCG--TCTT-GACATGCGG----TGGTG------------------AA----------------TTTA-----…
348	>M01634_72_000000000-C3HGL_1_2101_5106_19024	M01634_72_000000000-C3HGL_1_2101_5106_19024	TGCAGAATCCCGTGAACCATCGAGTCATTGAACGCA-AGTTGCG-------------CGCCAAGCC-TTCTGGCCGAGGACACGTCTTCCTGGGTGTC---ACAAA-------TCA-------------------TCC---------------------CC---C------CGTC--CTCT-----C-----------------------GAG---GAT----------------A-TGGGACG----GAAGCTGATC-TCCCGTGTG----T---TACCG-CACGCGGTTGGCCAAAAT----CCGAGCTA-AGAACG-TCAGGAGCG--TCTT-GACATGCGG----TGGTG------------------AA----------------TTTA-----…
307	>M01634_72_000000000-C3HGL_1_2101_5455_24641	M01634_72_000000000-C3HGL_1_2101_5455_24641	TGCAGAATCCCGTGAACCATCGAGTCTTTGAACGCA-AGTTGCG-------------CCCGAAGCC-ATTAGGCCGAGGGCACGTCTGCCTGGGTGTC---ACAAAT----CGTCG-------T-------------C---------------------CC---C------CATC--CTCT-----C-----------------------GAG---GAT----------------A-TGGGACG----GAAGCTGATC-TCCCGTGTG----T---TACCG-CACGCGGTTGGCCAAAAT----CCGAGCTA-AGAACG-TCAGGAGCG--TCTT-GACATGCGG----TGGTG------------------AA----------------TTTA-----…
236	>M01634_72_000000000-C3HGL_1_2101_5701_15110	M01634_72_000000000-C3HGL_1_2101_5701_15110	TGCAGAATCCCGTGAACCATCGAGTCTTTGAACGCA-AGTTGCG-------------CCCCAAGCC-TTCTGGCCAAGGGCACGTCTGCCTGGGTGTC---ACAAAT----CGTCG-------------------TCC---------------------CC---C------CATC--CTCT-----C-----------------------GAG---GAT----------------A-TGGGACG----GAAGCTGATC-TCCCGTGTG----T---TACCG-CACGCGGTTGGCCAAAAT----CCAAGCTA-AGGACG-CCAGGAACG--TCTT-GACATGCGT----TGGTG------------------AA----------------TTCA-----…
554	>M01634_72_000000000-C3HGL_1_2102_10389_14287	M01634_72_000000000-C3HGL_1_2102_10389_14287	TGCAGAATCCCGTGAACCATCGAGTCTTTGAACGCA-AGTTGCG-------------CCCGAAGCC-ATTAGGCCAAGGGCACGTCTGCCTGGGCGTC---ACACAA----CGTTG------------------CCCC---------------------CC---CAAACCTCGACTTCCAA-----------------------------GAG---GAC----------------G-GGGGGCG----GATGCTGGCC-TCCCGTGCG--------CCACGGCTCGCGGTTGGCCTAAAT----GCGAGTAC-TCGGCG---ACGAGCG--CCGC-GGCAATCGG----TGGTTG-----------------------------------TCCA-----…
80	>M01634_72_000000000-C3HGL_1_2102_10669_9184	M01634_72_000000000-C3HGL_1_2102_10669_9184	TGCAGAATCCCGTCAACCATCGAGTCTTTGAACGCA-AGTTGCG-------------CCCCAAGCC-TTCTGGCCGAGGGCACGTCTGCCTGGGTGTC---ACAAAT----CGTCA--------T-----------CC---------------------CC---C------CATC--CTCT-----C-----------------------GAG---GAT----------------A-TGGGACG----CAAGCTGATC-TCCCGTGTG----T---TACCG-CACGTGGTTGGCCAAAAT----GCGAGCTA-AGGACG-CCATGAGCG--TCTT-GACATGCGG----TATTG------------------AA----------------TTCA-----…
306	>M01634_72_000000000-C3HGL_1_2102_11230_22356	M01634_72_000000000-C3HGL_1_2102_11230_22356	TGCAGAATCCCGTGAACCATCGAGTCTTTGAACGAA-AGTTGCG-------------CCCCAAGCC-TTCTGGCCGAGGGCACGTCTGCCTGGGTGTC---ACAAAT----CGACG-------------------TCC---------------------CC---C------CATC--CTCT-----C-----------------------AAG---GAT----------------A-TGGGACG----GAAGCTGATC-TCCCGTGTG----T---TACCG-CACGCGGTTGGCCAAAAT----CTGAGCTA-AGGACA-TCAGAAGCG--TCTT-GACATGCGG----TGGTG------------------AA----------------TTTA-----…
456	>M01634_72_000000000-C3HGL_1_2102_11285_19446	M01634_72_000000000-C3HGL_1_2102_11285_19446	TGCAGAATCCCGTGAACCATTGAGTCTTTGAACGCA-AGTTGCG-------------CCCGAGGCC-TCCTGGTCGATGGCACGTCTGCCTGGGTGTC---AAGCAT----CGTCG--------------------CC---------------------CT---C------GCTCCCCTCGGCTCAC-----------------------GAG---GGC------------------TGGGGCG----GATACTGGTC-TCCCGCGCG----T---TCCCG-CCCGTGGTTGGCCTAAAA----TCGAGTTC-CCGGCG---ACGGTCG--CCAC-GAGAAGCGG----TGGTTGAG---------------AG-------------------------…
335	>M01634_72_000000000-C3HGL_1_2102_13382_17257	M01634_72_000000000-C3HGL_1_2102_13382_17257	TGCAGAATCCCGTGAACCATCGAGTCTTTGAACGCA-AGTTGCG-------------CCCCTAGCC-TTCTGGCCGAGGGCACGTCTGCCTGAGTGTC---ACAAAT----CATCG-----------------T--CC---------------------CC---C------CATC--CTCT-----C-----------------------GAG---GAT----------------A-TGGGATG----GAAGCTGATC-TCCCGTGTG----T---TACCG-CACGCGGTTGGCCAAAAT----CCAAGCTA-AGGGCG-TCAGAAGCG--TCTT-GACATGCGG----TGGTG------------------AA----------------TTTA-----…
493	>M01634_72_000000000-C3HGL_1_2102_13524_25426	M01634_72_000000000-C3HGL_1_2102_13524_25426	TGTAGAATCTCGTGAATCACTGAGTCTTTGAACGCA-AGTTGTG-------------CCCAAAGCC-TTTAGGCTGAGGACACGTATGCATGGGCGTC---ACGTAT--CCCGTTG-----CAC------------CC---------------------CC---A---ACCCGTCCCAAAT-----C-----------------------GGGCATGAT-----------GGCTAGTGGGAGCG----GATTTTGGCC-TCCCATGTA--------CTCGC-GTTATGATTGGTCTAAAA----TCGAGCCC-CGAGCG---ATGAACG--TCAC-AACAAGTGG----TGGTC------------TGTAATAG------------CTATTTCA-----…
156	>M01634_72_000000000-C3HGL_1_2102_13861_13375	M01634_72_000000000-C3HGL_1_2102_13861_13375	TGCAGAATCCCGTGAACCATTGAGTCTTTGAACGCA-AGTTGTG-------------CCCCAAGCC-TTATGGCCGAGGGCACGTCTGCCTGGGTGTC---ACAAAT----CATCG--------T-----------CC---------------------CC---C------CATC--CTCT-----C-----------------------GAG---GAT----------------A-TGGGACG----GAAGCTGATC-TCCCGTGTG----T---TACCG-CATGCGGTTGGCCAAAAT----CCAAGCTA-AGGACG-CCAAGAGCG--TCTT-GACATGCGG----TAGAG------------------AA----------------TTCA-----…
343	>M01634_72_000000000-C3HGL_1_2102_14055_6094	M01634_72_000000000-C3HGL_1_2102_14055_6094	CGCAGAATCCCATGAACCATCGAGTCTTTGAACGCA-AGTTGCG-------------CCCCAAGCC-TTCTGGCCGAGGGCACGTCTGCCGGGATGTC--------------------------------------------------------------------------------------------------------------------------------------------------------AGCTGATC-TCCCATGCG----T---TACCG-CACGCGGTTGGCCAAAAT----CCAAGCTA-AGGACG-CCAGGAGCG--TCTT-GACATGCGG----TGGTG------------------AA----------------TTCA-----…
522	>M01634_72_000000000-C3HGL_1_2102_14724_9938	M01634_72_000000000-C3HGL_1_2102_14724_9938	TGCAGAATCCCGTGAATCACCGAGTCTTTGAACGCA-AGTTGCG-------------CCCAAAGCC-TTTAGGTTGAGGGCACGTCTGCCTGGGCGTC---ACGTAT--CCCGTCG-----CAC------------CC---------------------CC---A---ACCCGTCCCAACT-----C-----------------------GGGAATGAT-----------GGCTGGTGGGAGCG----GATATTGGCC-TCCCGTGTA--------CTCGC-GTTATGGTTGGTTTAAAA----TCGATCCC-CGAGCG---ACGAACG--TCAC-GATAAGTGG----TGGTC------------TGTAATAG------------TTATTTCG-----…
700	>M01634_72_000000000-C3HGL_1_2102_14834_7663	M01634_72_000000000-C3HGL_1_2102_14834_7663	TGCAGAATCCCGTGAACCATCGAGTCTTTGAACGCA-AGTTGCG-------------CCCCAAGCC-TTCTGGCCGAGGGCACGTCTGCCTGGGTGTC---ACAAAT----CGTCG-------------------TCC---------------------CC---C------CATC--CTCT-----C-----------------------AGG---GAT----------------A-TGGGATG----GAAGCTGATC-TCCCGTGTG----T---TACCG-CATGCGGTTGGCCAAAAT----CCGAGCTA-AGGACG-CCAGGAGCG--TCTT-AAAATGCAG----TGGTG------------------AA----------------TTCG-----…
388	>M01634_72_000000000-C3HGL_1_2102_15338_7394	M01634_72_000000000-C3HGL_1_2102_15338_7394	TGCAGAATCCTGTGAACCATCGAGTCTTTGAATGCA-AGTTGCA-------------CCTGAAGCC-ATTAGGTTGAAAGCACGTTTGCCTGGGTGTC---ACGCAT--TGCGTCA--------------------CC---------------------CA----------------CTCC-----CCCATGCCCTAAGTGGGCATGTCGATG---CAT--------------------TGGCG----GATATTGGCC-CCCCGTTCA----C---ATCCG-TGCTCGGTCGGCCTAAAA---AACGGGTCC-CCAATG---ACGGACA--TCAC-GACAAGTGG----TGGTTG---------------CTAA------------ACCGTCGC-----…
409	>M01634_72_000000000-C3HGL_1_2102_15370_3727	M01634_72_000000000-C3HGL_1_2102_15370_3727	TGCATAATCCCGTGAACCATCGAGTCTTTGAACGCA-AGTTGCG-------------CCCCAAGCC-TTCTGGCCGAGGGCACGTCTGCCTGGGTGTC---ACAAAT----CGTCG-------------------TCC---------------------CC---C------CATC--CTCT-----C-----------------------GAG---GAT----------------A-TGGGATG----GAAGCTGATC-TCCCGTGTG----T---TACCG-CACGCGGTTGGCCAAAAT----CCGAGCTA-AGGACG-TCAGGAGCG--TCTT-GACATGCGG----TGGTG------------------AA----------------TTTA-----…
14	>M01634_72_000000000-C3HGL_1_2102_15802_10703	M01634_72_000000000-C3HGL_1_2102_15802_10703	TCCAGAATCCCATGAAGCATCGAGTCTTTGAATGCA-AGTTGGG-------------CCCGAAGTC-ATTAGGCCGATGGCACTTCTGCCTGGGCGTC---ACACGT----CGTTG---------C----------CC---------------------CC---T------CGAC-CCCTT-----C-----------------------TGG---AGT-----CG--------GG-CAGGATG----GATGGTCATC-TCCCGTGCG----C---CA-AT-CGCGTGGTTGGTCTAAAT---ATGAAGTCC-CTGGCG---ACCGACG--CCAC-GACAATCGG----TGGTTG---------------TCAA------------A-CCTCGG-----…
81	>M01634_72_000000000-C3HGL_1_2102_15840_5646	M01634_72_000000000-C3HGL_1_2102_15840_5646	TGCAGAATCCCGTGAAC----------------GCA-AGTTGCG-------------CCCCAAGCC-TTCTCGCCGAGGGCACGTCTGCCAGTGTGTC---ACAAAT----CGTCG--------T-----------CC---------------------CC---C------CATC--CTCT-----C-----------------------AGG---GAT----------------A-TGGGACG----GAAGCTGATA-TCCCGTGTG----T---TACCA-CATGCAGTTGGCCAAAAT----CCGAGCTA-AGGACG-CCAGGAGCG--TCTT-GACATGCGG----TGGTG------------------AA----------------TTCA-----…
600	>M01634_72_000000000-C3HGL_1_2102_16446_1732	M01634_72_000000000-C3HGL_1_2102_16446_1732	TGCAGAATCCCGTGAACCATCGAGTCTTTGAACGCA-AGTTGCG-------------CCCGATGCC-ATTAGGTTGAGGGCACGTCTGCCTGGGTGTC---ACATAT----CGAAG--------------------CC---------------------CT----------TCCCCAAATT-----------------------------AAACTTGGT---------------GTGCAGGGTG----AATGATGGCT-TCCCGTGAG-----CCATTTGGTCTCATGGTTGGCTGAAAA----TTGAGACC-TTGGCA---GGGTGTG--CCAT-GATTAATGG----TGGTTGTGTGACGCACGAAGCCCAA-------TCATGATCATTGC-----…
774	>M01634_72_000000000-C3HGL_1_2102_17597_19304	M01634_72_000000000-C3HGL_1_2102_17597_19304	TGCAGAATCCCGTGAACCATCGAGTCTTTGAACGCA-AGTTACG-------------CCCCAAGCC-TTCTGGCCGAGTGCACGTCTGCCTGGGTATC---ACAAAT----CGTCG--------T-----------CC---------------------CC---G------CATC--CTCT-----C-----------------------GAG---GAT----------------A-TGGGACG----GAAGCTGATC-TCCCGTGTG----T---TACCA-CACGCGGTTGGCCAAAAT----CCAAGCTA-AGGACG-TCAGAAGCG--TCTT-GACATGCGG----TGGTG------------------AA----------------TTTA-----…
718	>M01634_72_000000000-C3HGL_1_2102_18014_24020	M01634_72_000000000-C3HGL_1_2102_18014_24020	TGTAGAATCCCGTGAACCATCAAGTCTTTGAACGCA-AGTTGCA-------------CCCCAAGCC-TTCTAGCCGAGGGCACGTCTGCCTGGGTGTC---ACAAAT----CGTCG--------T-----------CC---------------------CC---C------CATC--CTCT-----C-----------------------GAT---GAT----------------A-TGGGACG-----AAGCTGATC-TCCCGTGTG----T---TACCG-CACGCGGTTGGCCAAAAT----CCAAACT--ATGATG-CCTGGAGCG--TCTT-GACATGCGC----TGGTG------------------AA----------------TTCA-----…
487	>M01634_72_000000000-C3HGL_1_2102_18242_18973	M01634_72_000000000-C3HGL_1_2102_18242_18973	TGTAAAATCCCATGAATCACCGAGTCCTTGAACATA-AGTTGTG-------------CCCAAAGCA-TTTAGGCTGAGGGTACGTCTATCGAGGTGTC---ACATAT--CCCGTCG-----CAC------------CC---------------------CC---A---ACCCATCCCAACT-----C-----------------------GGGCATGAT-----------GGCTGGTGGGAGCG----GATATTGGCC-TCCCGTGTA--------CTCGC-GTTACGGTTGGTCTAAAA----TTGAGCCC-CGAGCA---ACGAACG--TCAC-GACAAGTGG----TGGTC------------TGTAATAG------------CTATTTCG-----…
392	>M01634_72_000000000-C3HGL_1_2102_18790_13829	M01634_72_000000000-C3HGL_1_2102_18790_13829	GGGGGGGGGGGGGGGGGGGGGGGGGGGGGGGGGGGG-GGTTGGG-------------GGGGGGGCC-GGTAGGTTGAGGGCACGTCTGCCTGGGTGTC---ACATAT----CGAAG--------------------CC---------------------CT----------TCCCCAAATT-----------------------------AAACTTGGT---------------GTGCAGGGTG----AATGATGGCT-TCCCGTGAG-----CCATTTGGTCTCATGGTTGGCTGAAAA----TTGAGACC-TTGGCA---GGGTGTG--CCAT-GATTAATGG----TGGTTGTGTGACGCACGAAGCCCAA-------TCATGATCATTGC-----…
325	>M01634_72_000000000-C3HGL_1_2102_19567_9408	M01634_72_000000000-C3HGL_1_2102_19567_9408	TGCAGAATCCCGTGAACCATCGAGTCTTTGAACGCA-AGTTGCG-------------CCCCAAGCC-TTCTGGCCGAGGGCACGTCTGCCTGGGTGTC---ACAAAT----CATCG--------T-----------CC---------------------CC---C------CATC--CTCT-----C-----------------------AAG---GAT----------------A-TGGGACG----GAAGCTGTTC-TCCCGTGTG----T---TACCG-CACGCGGTTGGCCAAAAT----CCAAGCTA-AGGACG-CCAGGAACG--TCTT-GACATGCGT----TGGTG------------------AA----------------TTCA-----…
562	>M01634_72_000000000-C3HGL_1_2102_19851_25951	M01634_72_000000000-C3HGL_1_2102_19851_25951	TGCAGAATCCCGTGAACCATCGAGTCTTTGAACGCA-AGTTGCG-------------CCCGATGCC-------------GCACGTCTGCCTGGGTGTC---ACATAT----CGAAG--------------------CC---------------------CT----------TCCCCAAATT-----------------------------AAACTTGGT---------------GTGCAGGGTG----AATGATGGCT-TCCCGTGAG-----CCATTTGGTCTCATGGTT-GCTGAAAA----TTGAGACC-TTGGCA---GGGTGTG--CCAT-GATTAATGG----TGGTTGTGTGACGCACGAAGCCCAA-------TCATGATCATTGC-----…
79	>M01634_72_000000000-C3HGL_1_2102_20310_18926	M01634_72_000000000-C3HGL_1_2102_20310_18926	TGCAGAATCCCGTGAACCATCGACTCTTTGAACGCA-AGTTGCA-------------CCCCAAGCC-TTCTGGCCGAGGGCACGTCTGCCTGGGTGTC---ACAAAT----CATCG--------T-----------CC---------------------CC---C------CATC--CTCT-----C-----------------------AAG---GAT----------------A-TGGGACG----GAAGCTGTTC-TCCCGTGTG----T---TACCG-CACGCGGTTGGCCAAAAT----CCAAGCTA-AGGACG-CCAGGAACG--TCTT-GACATGCGT----TGGTG------------------AA----------------TTCA-----…
563	>M01634_72_000000000-C3HGL_1_2102_20951_16257	M01634_72_000000000-C3HGL_1_2102_20951_16257	TGCAGAATCCCGTGAACCATCGAGTCTTTGAACGCA-AGTTGCG-------------CCCGATGCC-ATTAGGTTGAGGGCACGTCTGCCTGGGTGTT---GCACAT----CGTTG--------------------CC---------------------CC---A---ATGCCTTTGCCAC-----GTGCT-------------------AGG---CAC-----------CG--AG-TGGGGCG----AATGTTGGCT-TCCCGCGAG--------CAGCGTCTCACGGTTGGTTGAAAA----CTGAGTCC-ATGGTG---GAGGGCG--CCGT-GATGGATGG----TGGCTGAGTTAAAGCTCGAGACCGA-----------------TCG-----…
209	>M01634_72_000000000-C3HGL_1_2102_22802_15571	M01634_72_000000000-C3HGL_1_2102_22802_15571	TGCAGAATCCCGTGAACCATCGAGTCTTTGAACGCA-AGTTGCG-------------CCTGATGCC-ATTAGGTTGAGGGCACGTCTGCCTGGGCGTC---ACATAT----CGAAG--------------------CC---------------------TC---T---TGCCAATTTCCTA-----TTGAT-------------------TGG---TAT-------------TGTG-CAAGATG-----ATGTTGGCC-TCCCGTGAG----CAC-CATCGCCTCATGGTTGGTTGAAAA----TCGAGACC-TTGGTA-----GAGTGTGCCAT-GATAAATGG----TGCATGTGTTAAGCACGAGACCAAA-------------------------…
520	>M01634_72_000000000-C3HGL_1_2102_23461_4106	M01634_72_000000000-C3HGL_1_2102_23461_4106	TGCAGAATCCCGTGAATCACCGAGTCTTTGAACGCA-AGTTGCG-------------CCCAAAGCC-TTTAGGTTGAGGGCACGTCTGCCTGGGCGTC---ACGTAT--CCCGTCG-----CAC------------CC---------------------CC---A---ACCCGTCCCAACT-----C-----------------------GGGCATGAT-----------GGCTGGTGGGAGCG----GATATTGGCC-TCCCGTGTA--------CTCGC-GTTACGGTTGGTCTAAAA----TCGAGCTC-CGGGCG---ACGAACG--TCAC-GACAAGTGG----TGGTC------------TGTAATAG------------CTATTTCG-----…
653	>M01634_72_000000000-C3HGL_1_2102_27656_17361	M01634_72_000000000-C3HGL_1_2102_27656_17361	TGCAGAATCCCGTGAACCATCGAGTCTTTGAACGCA-AGTTGCG-------------CCCCAAGCC-TTCTGGCCGAGGGCACGTCTGCCTGGGTGTC---ACAAAT----CGT----------------------CC---------------------CC---C------CATC--CTCT-----C-----------------------GAG---GAT----------------A-TGAGACG----GAAGCTGATC-TCCCGTGTG----T---TATCG-TACGCGGTTGGCCAAAAT----CCGAGCTA-AGGATT-CCAGGAGCA--TCTT-GACATGCGG----TGGTG------------------AA----------------TTTA-----…
168	>M01634_72_000000000-C3HGL_1_2102_5696_23771	M01634_72_000000000-C3HGL_1_2102_5696_23771	TGCAGAATCCCGCGAACCATCGAGTCTTTGAACGCA-AGTTGCG-------------CCCCAAGCC-TTCTGGCCGAGGGCACGTCTGCCTGGGTGTC---ACAAAT----CATCG-------T-------------C---------------------CC---C------CATC--CTCT-----C-----------------------GAG---GAT----------------A-TGGGACG----GAAGCTGATC-TCCCGTGTG----T---TACCG-CACGCGGTTGGCCAAAAT----CCAAGCTA-AGGACG-CCAGGAGCG--TCTT-GACATGCGG----TGGTG------------------AA----------------TTCA-----…
321	>M01634_72_000000000-C3HGL_1_2102_9369_7999	M01634_72_000000000-C3HGL_1_2102_9369_7999	TGCAGAATCCCGTGAACCATCGAGTCTTTGAACGCA-AGTTGCA-------------CCCCAAGCC-TTCTGGCCGAGGGCACGTCTGCCTGGGTGTC---ACAAAT----AGTCG--------T-----------CC---------------------CC---C------CATC--CTCT-----C-----------------------GAG---GAT----------------A-TGGGACG----GAAGCTGGTC-TCCCGTGTG----T---TACCG-CACGCGGTTGGCCAAAAT----CCTAGCTA-AGGATG-CCAGGAGCG--TCTT-GACATGCGG----TGGTG------------------AA----------------TTCA-----…
400	>M01634_72_000000000-C3HGL_1_2102_9890_20424	M01634_72_000000000-C3HGL_1_2102_9890_20424	TGCAGAATCCCGTGAACCATCGAGTCTTTGAACGCA-AGTTGCG-------------CCCGATGCC-ATTAGGTTGAGGGCACGTCTGCCTGGGTGTC---ACATAT----CGTCG--------T-----------CC---------------------CC---C------CATC--CTCT-----C-----------------------GAG---GAT----------------A-TCGGACG----GAAGCTGGTC-TCCCGTGTG----T---TACCG-CACGCGGTTGGCCAAAAT----CCGAGCTA-AGGACG-TCAGGAGCG--TCTT-GACATGCGG----TGGTG------------------AA----------------TTTA-----…
640	>M01634_72_000000000-C3HGL_1_2103_10560_8999	M01634_72_000000000-C3HGL_1_2103_10560_8999	TGCAGAATCCCGTGAACCATCGAGTCTTTGAACGCA-AGTTGCG-------------CCCCAAGCC-TTCTGGCCGAGGGCACGTCTGCCTGGGTGTC---ACAAAT----CGTCG--------T-----------CC---------------------CC---C------CATC--CTCT-----C-----------------------GAG---GAT----------------A-TCGGACG----GAAGCTGGTC-TCCCGTGTG----T---T-CCG-CACGCGGTTGGCCAAAAT----CCTAGCTA-AGGATG-CCAGGAGCG--TCTT-GACATGCGG----TGGTG------------------AA----------------TTCA-----…
273	>M01634_72_000000000-C3HGL_1_2103_10814_13327	M01634_72_000000000-C3HGL_1_2103_10814_13327	TGCAGAATCCCGTGAACCATCGAGTCTTTGAACGCA-AGTTGCG-------------CCCCAAGGC-TTCTGGCCGAGGGCACGTCTGCCTGGGTGTC---ACAAAT----CGTCG--------T-----------CC---------------------CC---C------CATC--CTCT-----C-----------------------GAG---GAT----------------A-TCGGACG----GAAGCTGGTC-TCCCGTGTG----T---TACCG-CACGCGGTTGGCCAAAAT----CCTAGCTA-AGGACG-CCAGAAGCG--TCTT-GACATGCGG----TGGTG------------------AA----------------TTAA-----…
340	>M01634_72_000000000-C3HGL_1_2103_12139_24594	M01634_72_000000000-C3HGL_1_2103_12139_24594	TGCAGAATCCCGTGAACCATCGAGTCTT-TGTTGCG-------------CCCCAAGCC-TTCTGGCCGAGGGCACGTCTGCCTGGGTGTC---ACAAAT----CGTCG-------------------TCC---------------------CC---C------CATC--CTCT-----C-----------------------GAG---GAT----------------A-TGGGACG----GAAGCTGATC-TCCCGTGTG----T---TACCG-CACGCGGTTGGCCAAAAT----CCGAGCTA-AGGACG-TCAGGAGCG--TCTT-GACATGCGG----TGGTG------------------AA----------------TTTA-------------…
345	>M01634_72_000000000-C3HGL_1_2103_12151_22448	M01634_72_000000000-C3HGL_1_2103_12151_22448	TGCAGAATCCCGTGAACCATCGAGTCTTTGAACGCA-AGTTGCA-------------CCCCAAGCC-TTCTGGCCGAGGGCACGTCTGCCTGGGTGTC---ACAAAT----CGTCG-------------------TCC---------------------CC---C------CATC--CTCT-----C-----------------------AAG---GAT----------------A-GGGGACG----GAAGCTGATC-TCCCGGGTG----T---TACCG-CACGCGGTTGGCCAAAAT----CCGAGCTA-AGGACT-TCAGTAGCA--TCAT-GACATGCGG----TGGTG------------------AA----------------TTTA-----…
679	>M01634_72_000000000-C3HGL_1_2103_12643_5015	M01634_72_000000000-C3HGL_1_2103_12643_5015	TGCAGAATCCCGTGAACCATCGAGTCTTTGAACGCA-AGTTGCG-------------CCCGAAGCC-TTCTGGCCGAGGGCACGTCTGCCTGGGTGTC---ACAAAT----CGTCG--------T-----------CC---------------------CC---C------CATC--CTCT-----C-----------------------GAG---GAT----------------A-TGGGACG----GAAGCTGGTC-TCCCGTGTG----T---TACCG-CACGCGGTTGGCCAAAAT----CCTAGCTA-AGGATG-CCAGGAGCG--TCTT-GACATGCGG----TGGTG------------------AA----------------TTCA-----…
272	>M01634_72_000000000-C3HGL_1_2103_13029_15263	M01634_72_000000000-C3HGL_1_2103_13029_15263	AATTGCAGAATCCCGTGAACCATCGAGTCTTTGAACGCA-AGTTGCG-------------CCCCAAGCC-TTCTGGCCGAGGGCACGTCTGCCTGGGTGTC---ACAAAT----CGTCG--------------------------------------------------------------------------------------------------------------------------------------------------------------------------------GCCAAAAT----CCAAGCTA-AGGACG-TCAGGAGCG--TCTT-GACATGCGG----TGGTG------------------AA----------------TTTA--…
433	>M01634_72_000000000-C3HGL_1_2103_13284_17022	M01634_72_000000000-C3HGL_1_2103_13284_17022	TGCAGAATCCCGTGAACCATCGAGTCTTTGAACGCA-AGTTGCG-------------CCCCAAGCC-TTCTGGCCGAGGGCACGTCTGCATGGGTGTC---ACAAAT----CGTCG-------------------TCC---------------------AC---C------CATC--CTCT-----C-----------------------GAG---GAT----------------A-TCGGACG----GAAGCTAGTC-TCCCGTGTG----T---TACCG-CACGCGGTTGGCCAAAAT----CCGAGCTA-AGGATG-CCAGGAGCG--TCTT-GACATGCGG----TGGTG------------------AA----------------TTTA-----…
246	>M01634_72_000000000-C3HGL_1_2103_14378_15476	M01634_72_000000000-C3HGL_1_2103_14378_15476	TGCAGAATCCCGTGAACCATCGAGTCTTTGAATGCA-AGTTGCG-------------CCCCAAGCC-TTCTGGCCGAGGGCACGTCTGCCTGGGTGTC---ACAAAT----GGTCG--------T-----------CC---------------------CC---C------CATC--CTCT-----C-----------------------GAG---GAT----------------A-TGGGACG----AAAGCTGATC-TCCCGTGTG----T---TAACG-CACACGGTTGGCCAAAAT----CCGAGCTA-AGGACG-CCAGGAGCA--TCTT-GACATGCGG----TGGTG------------------AA----------------TTCA-----…
77	>M01634_72_000000000-C3HGL_1_2103_14423_23423	M01634_72_000000000-C3HGL_1_2103_14423_23423	TGTAGAATCCCGTGAACCATCGAGTCTTTGAACGCA-AGTTGCG-------------CCCCAAGCT-TTCTGGCCGAGGGCACGTCTGGCTGGGTGTC---ACAAAT----ATTCG--------T-----------CC---------------------CC---C------CATC--CTCT-----C-----------------------GAG---GAT----------------A-GGGGACG----GAAGCTGATC-TCCCGTGTG----T---TACCG-CATGCGGTTGGCCAAAAT----CCAAGCTA-AGGACG-CCAGGAGCG--TCTT-GACATGCGG----TGGTG------------------AA----------------TTCA-----…
40	>M01634_72_000000000-C3HGL_1_2103_15498_25401	M01634_72_000000000-C3HGL_1_2103_15498_25401	TGCAGAATCCCGTGAACCATCGAGTTTTTGAACGCA-AGTTGCG-------------CCCGAAGCC-ATTCGGCCGAGGGCACGTCTGCCTGGGCGTC---ACGCAT--CGCGTCG--------------------CC---------------------CC---A-GACCATGC-TCCCAC-----------------------------TTG---GGA-----TGT-GTTTGGTTTGGGA-CG----GAGATTGGTC-TCCCGTGCC-----------TATGGTGCGGTTTGCCTAAAA----AAGAGTCC-CCTTTG---GCGGACG---CAC-GGCTAGTGG----TGGTTGTC---------------AA------------G-GCC--T-----…
263	>M01634_72_000000000-C3HGL_1_2103_15982_5706	M01634_72_000000000-C3HGL_1_2103_15982_5706	TGCAGAATCCTGTGAACCATCGAGTCTTTGAACGCA-AGTTGCG-------------CACCAAGCC-TTCTGGCCGAGGGCACGTCTGCCTGGGTGTC---ACAAAT----CGTCA-------------------TCC---------------------CC---C------CATC--CTCT-----C-----------------------GAG---GAT----------------A-TGGGACG----GAAGCTGATA-TCCCGTGTG----T---TACCG-CACGTGGTTGGCCAAAAT----CCGAGCTA-AGGACG-TCAGTAGCG--TCTT-GACATGCGG----TGGTG------------------AA----------------TTTA-----…
385	>M01634_72_000000000-C3HGL_1_2103_16317_2578	M01634_72_000000000-C3HGL_1_2103_16317_2578	TGCAGAATCCCGTGAACCATCGAGTCTTTGAACGCA-AGTTGCG-------------CCCGAAGCC-TTCTGGCTGAGGGCACGTCTGCCTGGGCGTC---ACGCAT--CGCGTCG-----CA-------------TC---------------------CC---A---ACTCGCCTCCTTC-----------------------------GGGAGCAGT-------------AGAGTGGGATCG----GATATTGGTC-CCCCGTGCG--------CACCAGCGCGCGGTCGGCCTAAAT----GCGAACCC-GCGGCG---ACTCGCG--TCGC-GACAAGTGG----TGGTT------------------GA------------ACTCTCAA-----…
784	>M01634_72_000000000-C3HGL_1_2103_16890_6486	M01634_72_000000000-C3HGL_1_2103_16890_6486	TGCAGAATCCCGTGAACCATCGAGTCTTTGAACGCA-AGTTGCG-------------CCCCAAGCC-TTCTGGCCGAGGCCACGTCTGCCTGGGTGTC---ACAAAT--CGTCACC--------------------CC---------------------CC---C------CATC--CTCT-----C-----------------------GAG---GAT----------------A-TAGGACG----GAAGCTGATC-TCCCGTGTG----T---TACCG-CACGCGGTTGGCCAAAAT----CCAAGCTA-GGGACG-CCAGGAGCA--TCTT-GACATGCGG----TGGTG------------------AA----------------TTCA-----…
326	>M01634_72_000000000-C3HGL_1_2103_17246_18273	M01634_72_000000000-C3HGL_1_2103_17246_18273	TGCAGAATCCCGTGAACCATCGAGTCTTTGAACGCA-AGTTGCG-------------CCCCAAGCC-TTCTGGCCGAGGGCACGTCTGCCTGGGTGTC---ACAAAC----CGTCG-------T-C----------CC---------------------TC---T------CATC--CT-T-----C-----------------------TCG---GAT----------------A-TGGGACG----GAAACTGGTC-TCCCGTGTG----T---TACCG-CACGCGGTTGGCCAAAAT----CCAAGCTA-AGGACG-TCTGAAGCG--TCTT-GACATGCGG----TGGTG------------------AA----------------CTAA-----…
319	>M01634_72_000000000-C3HGL_1_2103_17387_3197	M01634_72_000000000-C3HGL_1_2103_17387_3197	TGCAGAATCCCGTGAACCATCGAGTCTTTGAACGAA-AGTTGCG-------------CCCCAAGCC-TTCTGGCCGAGGGCACGTCTGCCTGGGTGTT---ACAAAT----CGTCG-------------------TCC---------------------CC---C------CAT---C-CT-----C--------------------------------------------------T----C-----GAAGCTGATC-TCCCGTGTG----T---TACCG-CACGCGGTTGGCCAAAAT----CCAAGCTA-AGGACG-TCAGAAGCG--TCTT-GACATGCGG----TGGTG------------------AA----------------TTTA-----…
159	>M01634_72_000000000-C3HGL_1_2103_17843_14198	M01634_72_000000000-C3HGL_1_2103_17843_14198	TGCAGAATCCCGTGAACCATCGAGTCTTTGAACGCA-AGTTGCG-------------CCCCAAGCC-TTCTGGCCGAGGGCACGTCTGCCTGGGTGTC---ACAAAT------T-G--------T-----------CC---------------------CC---C------CATC--CTCT-----C-----------------------GAG---GAT----------------A-TGGGACG----GAAGCTGATC-TCCCGTGTG----T---TACCG-CACGCGGTTGGCCAAAAT----CCAAGCTA-AGGACG-CCAGGAGCG--TCTT-GACATGCGG----TGGTG------------------AA----------------TTCA-----…
678	>M01634_72_000000000-C3HGL_1_2103_19162_10791	M01634_72_000000000-C3HGL_1_2103_19162_10791	TGTAGAGTCACGTGAACCAGCAAGTCTTTGAACGCA-AGTTGCA-------------CCCCAAACC-TTCTGGCCGAGGGCACGTCTGCCTGGGTGTC---ACAAAT----CGTCG-------------------TCC---------------------CC---C------CATC--CTCT-----C-----------------------GAG---GAT----------------A-TGGGACG----GAAGCTGATC-TCCCGTGCG----T---TACCG-CACGCGGTTGGCCAAAAT----CCGAGCTA-AGAACG-TCAGGAGCG--TCTT-GACATGCGG----TGGTG------------------AA----------------TTTA-----…
721	>M01634_72_000000000-C3HGL_1_2103_19174_24384	M01634_72_000000000-C3HGL_1_2103_19174_24384	TGCAGAATCCCGTGAACCATCGAGTCTTTGAACGCA-AGTTGCG-------------CCCCAAGCC-TTCTGGCTGAGGGCACGTCTGCCTGGGTGTC---ACAAAT----ATTTG-------T------------CC---------------------CC---C------CATA--CTCT-----C-----------------------GAG---GAT----------------A-GGGGACG----GAAGCTGATC-TCCCGTGTG----T---TACCG-CACGCGGTTGGCCAAAAT----CCTAGCTA-AGGATG-CCAGGAGCG--TCTT-GACATGCGG----TGGTG------------------AA----------------TTCA-----…
210	>M01634_72_000000000-C3HGL_1_2103_19825_22740	M01634_72_000000000-C3HGL_1_2103_19825_22740	GGGGGGGGGGGGGGGGGGGGGGGGGGGGGGGGCGCA-GGTGGCG-------------CCTGATGCC-ATTAGGTTGAGGGCACGTCTGCCTGGGCGTC---ACATAT----CGAAG--------------------CC---------------------TC---T---TGCCAATTTCCTA-----TTGAT-------------------TGG---TAT-------------TGTG-CAAGATG-----ATGTTGGCC-TCCCGTGAG----CAC-CATCGCCTCATGGTTGGTTGAAAA----TCGAGACC-TTGGTA-----GAGTGTGCCAT-GATAAATGG----TGCATGTGTTAAGCACGAGACCAAA-------------------------…
437	>M01634_72_000000000-C3HGL_1_2103_20204_19067	M01634_72_000000000-C3HGL_1_2103_20204_19067	TGCAGAATCCCGTGAACCATCGAGTCTTTGAACGCA-AGTTGCG-------------CCCCAAGCC-TTCTGGCCGAGGGCACGTCTGCCTGGGTGTC---ACAAAT----CGTCG-------T------------CC---------------------CC---C------CATC--CTCT-----C-----------------------GAG---GAT----------------A-TGGGATG----GAAGCTGATC-TCCCGTGTG----T---TACCG-CACGCGGTTGGCCAAAAT----CCTAGCTA-AGGATG-CCAGGAGCG--TCTT-GACATGCGG----TGGTG------------------AA----------------TTCA-----…
382	>M01634_72_000000000-C3HGL_1_2103_20904_7307	M01634_72_000000000-C3HGL_1_2103_20904_7307	TGCAGAATCCCGTGAACCATCGAGTCTTTGAACGCA-AGTTGCG-------------CCTGATGCC-ATTAGGTTGAGGGCACGTCTGCC--GGCGTC---ACATAT----CGAAG--------------------CC---------------------TC---T---TGCCAATTTCCTA-----------------------------TTGATTGGT----------------A-TTGTGCAAGATGATGTTGGCC-TCCCGTGAG--CAC---CATCGCCTCATGGTTGGTTGAAAA----TCGAGACC-TTGGTA---GAGTGTG--CCAT-GATAAATGG----TGCATGTGTGA------------------------------TCCA-----…
327	>M01634_72_000000000-C3HGL_1_2103_21925_17022	M01634_72_000000000-C3HGL_1_2103_21925_17022	TGCAGAATCCCGTGAACCATCGAG-TCTTTGA-------------ACGCAAGTCTGCCTGGCCGAGGGCACGTCTGCCTGGGTGTC---ACAAAC----CGTCG-------T-C----------CC---------------------TC---T------CATC--CT-T-----C-----------------------TCG---GAT----------------A-TGGGACG----GAAACTGGTC-TCCCGTGTG----T---TACCG-CACGCGGTTGGCCAAAAT----CCGAGCTA-AGGGCG-CCTAGAGCG--TCAC-GACATGCGG----TGGTG------------------AA----------------CTAA-----------------…
604	>M01634_72_000000000-C3HGL_1_2103_22000_4135	M01634_72_000000000-C3HGL_1_2103_22000_4135	TGCAGAATCCCGTGAACCATCGAGTCTTTGAACGCA-AGTTGCG-------------CCCGATGCC-ATTAGGTTGAGGGCACGTCTGCCTGGGTGTC---ACATAT----CGAAG--------------------CC----------------------C---T---TCCCCAAAT---T---------------------------AAACTTGGTGT----------------G-CAGGGTG----GATGTTGGCC-TCCCGTGAA--CTG---TTTTTGGTCATGGTTGGTTGAAAA----TTGAGACC-TTGGCA---GGGTGTG--CCAT-GATTAATGG----TGGTTGTGTGACGCACGAAGCCCAA-----------------TCA-----…
701	>M01634_72_000000000-C3HGL_1_2103_22097_21808	M01634_72_000000000-C3HGL_1_2103_22097_21808	TGCAGAATCCCGTGAACCATCGAGTCTTTGAACGCA-AGTTGCG-------------CCCCAAGCC-TTCTGGCCGAGGGCACGTCTGCCTGGGTGTC---ACAAAT----TGTCG-------------------TCC---------------------CC---C------CATC--CTCT-----C-----------------------GAG---GAT----------------A-TGGGACA----AAAGCTGATC-TCCCGTGTG----T---TACCG-CACGCGGTTGGCCAAAAT----CCGAGCTA-AGGACG-TCAGAAGCG--TCTT-GACATGCGG----TGGTG------------------AA----------------TTTA-----…
305	>M01634_72_000000000-C3HGL_1_2103_23811_16409	M01634_72_000000000-C3HGL_1_2103_23811_16409	TGCAGAATCCCGTGAACCATCGAGTCTTTGAACGCA-AGTTGCG-------------CCCCAAGCC-TTCTGGCCGAGGGCACGTCTGCCTGGGTGTC---ACAAAT----CGTCG-------T------------CC---------------------CC---C------CATC--CTCT-----C-----------------------GAG---GAT----------------A-TGGGATG----GAAGCTGATC-TCCCGTGTG----T---TACCG-CACGCGGTTGGCCAAAAT----CTGAGCTA-AGGATG-TCAGGAGCG--TCTT-TACATGCGG----TGGTG------------------AA----------------TTCA-----…
104	>M01634_72_000000000-C3HGL_1_2103_23887_13174	M01634_72_000000000-C3HGL_1_2103_23887_13174	TGCAGAATCCCGTGAACCATCGAGTCTTTGAACGCA-AGTTGCA-------------CCCGAAGCC-TTCTAGCCGAGGGCACATCTGCCTGGGTGTC---ACAAAT----CGTCG-------T------------CC---------------------CC---C------CATC--CTCT-----C-----------------------GAG---GAT----------------A-TCGGACG----GAAGCTAGTC-TCCCGTGTG----T---TACCG-C------------------------------------------------------ACATGCGG----TGGTG------------------AA----------------TTCA-----…
83	>M01634_72_000000000-C3HGL_1_2103_24854_6510	M01634_72_000000000-C3HGL_1_2103_24854_6510	TGCAGAATCCCGTGAACCATCGAGTCTTTGACCGCA-TGTTGCG-------------CCCCAAGCC-TTCTGGCCGAGGGCACGTCTGCCTGGGTGTC---ACAAAT----CATCG--------T-----------CC---------------------CC---C------CATC--CTCT-----C-----------------------GAG---GAT----------------A-TGGGACG----GAAGCTGATC-TCCCGTGTG----T---TACCG-CACGCGGTTGGCCAAAAT----CTGAGCTA-AGGACG-CGAGGAGCG--TCTT-CACATGCGG----TGGTG------------------AA----------------TTCA-----…
31	>M01634_72_000000000-C3HGL_1_2103_25142_8767	M01634_72_000000000-C3HGL_1_2103_25142_8767	TGCAGAATCCAGTGAACCATCGAGTCTTTGAACGTA-AGTTACG-------------CCCGAAGTC-GTTAGGCCAAGGCCACGTCTGCCTGGGCGTC---ATACGT----CGTTG--------------------CC---------------------CC---C----CTCAACCCTTCA-----------------------------GGGGCCGGG------------------TGGGACG----AATGATGGCCTTCCCGTGTG--------CCCTGTCACGCGGTTGGCATAAAT---ACCGAGTCC-TCGGCG---ACCGGCG--TCGC-GGCGATCGG----TGGTTGTC---------------AA-------------ACCTCGG-----…
407	>M01634_72_000000000-C3HGL_1_2103_26395_12015	M01634_72_000000000-C3HGL_1_2103_26395_12015	TGCAGAATCCCGTGAACCATCGAGTCTTTGAACGCA-AGTTGCG-------------CCCCAAGCC-TTCTGGCCGAGGGCACGTCTGCCTGGGTGTC---ACAAAT----CGTCG-------T------------CC---------------------CC---C------CATC--CTCT-----C-----------------------GAG---GAT----------------A-TGGGATG----GAAGCTGGAC-TCCCGTGTG----T---TACCG-CACGCGGTTGGCCAAAAT----CCGAGCTA-AGGATG-GTAGGAGCG--TCTT-GACATGCGG----TGGTG------------------AA----------------TTAA-----…
42	>M01634_72_000000000-C3HGL_1_2103_26892_13049	M01634_72_000000000-C3HGL_1_2103_26892_13049	GGGGGGGGGGGGGGGGGGGGGGGGGGGGGGGGCGCA-GGTTGCG-------------CCCGATGCC-ATTAGGTTGAGGGCACGTCTGCCTGGGTGTC---ACATAT----CGAAG--------------------CC---------------------CT----------TCCCCAAATT-----------------------------AAACTTGGT---------------GTGCAGGGTG----AATGATGGCT-TCCCGTGAG-----CCATTTGGTCTCATGGTTGGCTGAAAA----TTGAGACC-TTGGCA---GGGTGTG--CCAT-GATTAATGG----TGGTTGTGTGACGCACGAAGCCCAA-------TCATGATCATTGC-----…
661	>M01634_72_000000000-C3HGL_1_2103_27347_19508	M01634_72_000000000-C3HGL_1_2103_27347_19508	TGCAGAATCCCGTGAACCATCGAGTCTTTGAACGCA-AGTTGCG-------------CCCCAAGCC-TTCTGGCCGAGGGCACGTCTGCCTGGGTGTC---ACAAAT----CGTCG-------T------------CC---------------------CC---C------CATC--CTCT-----C-----------------------GAG---GAT----------------A-TGGGACG----GAAGCTGATC-TCCCGTGTG----T---TACCG-CATGCGGTTGGCCAAAAT----CTGAGCTA-ACGACG-CCAGGAGCG--TCTT-GACATGCGC----TGGTG------------------AA----------------TTCA-----…
735	>M01634_72_000000000-C3HGL_1_2103_27403_9622	M01634_72_000000000-C3HGL_1_2103_27403_9622	TGCAGAATCCCGTGAACCATCGAGTCTTTGAACGCA-AGTTGCG-------------CCCCAAGCC-TTCTGGCCGAGGGCAAGTCTGCCTGGGTGTC---ACAAAT----CGTCG--------T-----------GC---------------------CG---C------CATC--CTCT-----C-----------------------GAG---GAT----------------A-TGGGACG----GAAGCTGGTC-TCCCGTGTG----T---TACCG-CACGCGGTTGGCCAAAAT----CCTAGCTA-AGGATG-CCAGGAGCG--TCTT-GACATGCGG----TGGTG------------------AA----------------TTTA-----…
301	>M01634_72_000000000-C3HGL_1_2103_27422_20405	M01634_72_000000000-C3HGL_1_2103_27422_20405	TGCAGAATCCCGTGAACCATCGAGTTTTTGAACGCA-AGTTGCG-------------CCCGAAGCC-ATCAGGCCGAGGGCACGTCTGCCTGGGCGTC---ACACGT----CGTTG--------CC----------CC---------------------CC---T------CAGC-CTCCT-----C-----------------------GGA---TGC-----TG--------GG-TGGGACG----GATGATGGCC-TCCCGTGTG----C---TTGGT-CACGCGGTTGGCATAAAT---ATCAAGTCC-TTGGCG---ACTAACG--CCAC-GACAATCGG----TGGTTG---------------TCAA------------A-CCTCTG-----…
218	>M01634_72_000000000-C3HGL_1_2103_3183_16820	M01634_72_000000000-C3HGL_1_2103_3183_16820	ACTTGGTGTGAATTGCAGAATCCCGTGAACCATCGAGTCTTTGAACGCA-AGTTGCG-------------CCCGAAGCC-ATTAGGCCGAGGGCACGCCTGCCTGGGTGTT---GCACAT----CGTTG--------------------CC---------------------CC---C---GTGCCTTGGCCAC-----------------------------GTGCCAGGC------------ACCAAGCGGGGCG----AATGTTGGCT-TCCCGCGAG--------CAATGTCTCACGGTT---------------------------------------------GACCCATGG----GGGTC--------------------------------…
51	>M01634_72_000000000-C3HGL_1_2103_5052_13304	M01634_72_000000000-C3HGL_1_2103_5052_13304	TGCAGAATCCCGTGAACCATCGAGTCTTTGAACGCA-AGTTGCG-------------CCCGATGCC-ATTAGGTTGAGGGCACGTCTGCCTGGGTGTC---ACATAT----CGAAG--------------------CC---------------------CT----------TCCCCAAATT-----------------------------AAACTTGGT---------------GTGCAGGGTG----AATGATGGCT-TCCCGTGAG-----CCATTTGCTCTCATGGTTGGCTGAAAA----TTGAGACC-TTGGCA---GGGTGTG--CCAT-GATTAATGG----TGGTTGTGTGACGCACGAAGCCCAA-------TCATGATAATGCGT----…
780	>M01634_72_000000000-C3HGL_1_2103_6403_6920	M01634_72_000000000-C3HGL_1_2103_6403_6920	TGCAGAATCCCGTGAACCATCGAGTTTTTGAACGCA-AGTTGCG-------------CCCGAAGCC-GTTAGGCTGAGGGCACGCCTGCCTGGGTCTC---ACACAT----CGTTG--------------------CC---------------------CC---A---------ATGCCAA-----TCGCCTCACTTTGT------AGGTATT---TGC----------------T-TGGGGTG----AATGTTGGCC-TCCCGTGAG----C---TTTGT-CTCACGGTTGGTTGAAAA----TCGAGTGC-ATGGTG---TCGGGTGTACCAT-GATGGATGG--TGGTTGAGTGATGATGCTCGAGACCAA-----------------TCA-----…
552	>M01634_72_000000000-C3HGL_1_2103_6422_14922	M01634_72_000000000-C3HGL_1_2103_6422_14922	CGCAGAATCCCGTGAACCATCGAGTCTTTGAACGCA-AGTTGCG-------------CCCGAAACC-ATTAGGTCGAGGGCACGTCTGCCTGGGTGTC---ACACAT----CGTTG--------------------CC---------------------CC---A---------ACGCCAA-----ATGCT--TCGTGCT------ATGCG-G---CGT----------------G-TGGGGTG----AATGTTGGCC-TCCCGCGAG----C---TAAGG-CTCACGGTTGGTTTAAAT----TTGGGTCC-ATGGTA---GGGTATG--CCAT-TATGGATGG----TGGTTGAG-TAACGCTCGAGACCAA-----------------TCA-----…
315	>M01634_72_000000000-C3HGL_1_2103_6934_10570	M01634_72_000000000-C3HGL_1_2103_6934_10570	TGCAGAATCCCGTGAACCATCGAGTCTTTGAACGCA-AGTTGCG-------------CCCCAAGCC-TTCTGGCCGAGGGCACGTCTGCCTGGGTGTC---ACAAAT----CGTCG-------------------TCC---------------------CC---C------CAAC--CTCT-----C-----------------------GAG---GAT----------------A-TGGGACG----GAAGCTGATC-TCCCGTGTG----T---TACCG-CACGC----GG------T----CCGAGCTA-AGGACG-TCAGAAGCG--TCTT-GACATGCGG----TGGTG------------------AA----------------TTTA-----…
725	>M01634_72_000000000-C3HGL_1_2103_8222_15003	M01634_72_000000000-C3HGL_1_2103_8222_15003	TGCAGAATCCCATGAACCATCGAGTCTTTGAACGCA-AGTTACG-------------CCCCAAGCC-TTCTGGCCGAGGGCACGTCTGCCTGGGTGTC---ACAAAT----CGTCG-------------------TAC---------------------CC---C------CATC--CTCT-----C-----------------------GAG---GAT----------------A-TGGGACG----GAAGCTGATC-TCCCGTGTG----T---TACCG-CACGCGGTTGGCCAAAAT----CCAAGCTA-AGGACG-TCAGAAGCG--TCTT-GACATGCGG----TGGTG------------------AA----------------TTTA-----…
188	>M01634_72_000000000-C3HGL_1_2103_8255_10671	M01634_72_000000000-C3HGL_1_2103_8255_10671	TGCAGAATCCCGTGAACCATCGAGTCTTTGAACGCA-AGTTGCG-------------CCCGATGCC-ATTAGGCCGAGGGCACGTCTGCCTGGGCGTC---ACATAT----CGAAG--------------------CC---------------------TCTCGC------CAATTTCCCT---------------------------TTGATTATTGT----------------G-CAGGGTG----GATGTTGGCC-TCCCGTGAA----CTCTTTTTG-GTCATGGTTGGTTGAAAA----TTGAGACC-TTGGTA---GGGTGTG--CCAT-GATAGATGG----TGGCTGTGTTACGCACGAGACCAAG-------------------------…
52	>M01634_72_000000000-C3HGL_1_2103_9609_11244	M01634_72_000000000-C3HGL_1_2103_9609_11244	TGCAGAATCCTGTGAACCATCAAGTCTTTTAACGCA-AGTTGCG-------------CCCCAAGCC-TTCTGGCCGAGGGCACGTCTGCCTGGGTGTC---ACAAAT----CATCG--------T-----------CC---------------------CC---C------CATC--CTCT-----C-----------------------GAG---GAT----------------A-TGGGACG----GAAGCTGATC-TCCCGTGTG----T---TACCG-CACGCGGTTGGCCAAAAT----CCGAGCTA-AGGACGCCCAGGAGCA--TCTT-GACCTGCGG----TGGTT------------------AA----------------TTCA-----…
766	>M01634_72_000000000-C3HGL_1_2104_10336_21959	M01634_72_000000000-C3HGL_1_2104_10336_21959	TGCAGAATCCCGTGAACCATCGAGTCTTTGAACGCA-AGTTGCG-------------CCCCAAGCC-CTCTGGCCGAGGGCACGTCTGCCTGGGTGTC---ACAAAT----CGTCG-----------------T--CC---------------------CC---C------CATC--CTCT-----C-----------------------GAG---GAT----------------A-TGGGATG----GAAGCTGATC-TCCCATGTG----T---TACTG-CACGCGGTTGGCCAAAAT----CCAAGCTA-AGGACG-TCAGAAGCG--TCTT-GACATGCGG----TGGTG------------------AA----------------TTTA-----…
663	>M01634_72_000000000-C3HGL_1_2104_10363_16790	M01634_72_000000000-C3HGL_1_2104_10363_16790	TGCAGAATCCCGTGAACCATCGAGTTTTTGAACGCA-AGTTGCG-------------CCCGAGACC-TTTAGGTTGAGGGCACGTCTGCCTGGGCGTC---ACACAC--AGCGTCG--------------------CT---------------------CT---A------CACCAACCTA-----------------------------TTT---GGT----------------A-GGGAGCG----GATATTGGCC-CCCCGAGTC--------CTTTG-GGCACGGTCGGCACAAAT----ATTGGTCC-CCGGCA---GCGAGTG--TCGC-GGTCAGCGG----TGGTTGTATTTTCCTCCAAAGACAA-------AATGACGCGTTC------…
223	>M01634_72_000000000-C3HGL_1_2104_12431_27073	M01634_72_000000000-C3HGL_1_2104_12431_27073	TGCAGAATCCCGTGAACCATTGAGTCTTTGAACGCA-AGTTGCG-------------CCCGAAGCC-ACTAGGCTAAGGGCACGTCTGCCTGGGTGTC---ACAAAT----CGTCG--------T-----------CC---------------------CC---C------CATC--CTCT-----C-----------------------GAG---GAT----------------A-TGGGACG----GAAGCTGATC-TCCCGTGTG----T---TACCG-CACGCAGTTGGCCAAAAT----CCGAGCTA-AGGACG-TCAGTAGCG--TCTT-GACATGCGG----TGGTG------------------AA----------------TTTA-----…
540	>M01634_72_000000000-C3HGL_1_2104_12648_26032	M01634_72_000000000-C3HGL_1_2104_12648_26032	TGCAGAATCCCGTGAACCATCGAGTCTTTGAACGCA-AGTTGCG-------------CCCCAAGCC-TTCTGGCCGAGGGCACGTTTACC------------------------------------------------------------------------------------------T-----C-----------------------AAG---GAT----------------A-TGGTACG----GAAGCTGATC-TCCCGTGTG----T---TACCG-CACGTGGTTGGCCAAAAT----CCAAGCTA-AGGACA-CCAGGAGCA--TCTT-GACATGCGG----TGGTG------------------AA----------------TTCA-----…
240	>M01634_72_000000000-C3HGL_1_2104_12791_23485	M01634_72_000000000-C3HGL_1_2104_12791_23485	TGCAGAATCCCGTGAACCATTGAGTCTTTGAACGCA-AGTTGCG-------------CCCGAAGCC-ACTAGGCTAAGGGCACGTCTGCCTGGGTGTC---ACGCAT-CT-AGTTG--------------------CC---------------------CC---C---TGACCAAACTAAT-----CTTCT-------------------AAG---AGATTTTGTCA---TT--TT-GGGGGCG----GAAATTAGCC-T-CTGTGC---------CATAT-TGTGCGTTTCGCGCAAAA----TTGAGTCT-ATGGTG---ACGAATG--TCAC-GACAT-CGG----TGGTTGTA-------------AGAA------------GACCTTCT-----…
527	>M01634_72_000000000-C3HGL_1_2104_13097_3441	M01634_72_000000000-C3HGL_1_2104_13097_3441	TGCAAAATCCCGTGAATCACCGAGTCTTTGAACGCA-AGTTGCG-------------CCCAAAGCC-TTTAGGCTAAGGGCACATCTGCTTGGGCGTC---ACGTAT--CCCGTCG-----CAC------------CC---------------------CC---A---ACCTGTCCCAACT-----C-----------------------GGGCATGAT-----------GACTGGTGGGAGAA----GATATTGGCC-TCCCGTGTA--------CTCGT-GTTAAGTTTGGTCTAAAA----TTGAGCCC-CGAGCG---ACGAATG--TCAC-GACAAGTGG----TGGTC------------TGTAATAG------------CCATTTCG-----…
757	>M01634_72_000000000-C3HGL_1_2104_13504_13363	M01634_72_000000000-C3HGL_1_2104_13504_13363	TGCAGAATCCCGTGAACCATCGAGTCTTTGAACGCA-AGTTGCG-------------CCCCAACCC-TTCTAGCCGAGGGCACGTCTGCCTGGGTGTC---AAAAAT----CTTCA-------------------TCC---------------------CC---C------CATC--CTCT-----C-----------------------GAG---GAT----------------A-GGGGACG----GAAGCTGATC-TCCCGTGTG----T---TACCG-CACGTGTTTGGCAAAAAT----CCGAGCTA-AGGATT-CCAGGAGCA--TCTT-GACATGCGG----TGGTG------------------AA----------------TTTA-----…
670	>M01634_72_000000000-C3HGL_1_2104_13824_17121	M01634_72_000000000-C3HGL_1_2104_13824_17121	TGCAGAATCTCGTGAACCATCGAGTCTTTGAACGCA-AGTTGCG-------------CCCCAACCC-TTCTAGCCGAGGGCACGTCTGCCTGGGTGTC---ACAAAT----CTTCA-------T------------CC---------------------CC---C------CATC--CTCT-----C-----------------------GAG---GAT----------------A-GGGGACG----GAATCTGATC-TCCCGTGTG----T---TACCG-CACGTGGTTGGCCAAAAT----CCTAGCTA-AGGATG-CCAGGAGCG--TCTT-GACATGCGG----TGGTG------------------AA----------------TTCA-----…
761	>M01634_72_000000000-C3HGL_1_2104_14315_24139	M01634_72_000000000-C3HGL_1_2104_14315_24139	TGCAGAATCCCGTGAACCATCGAGTCTTTGAACGCA-AGTTGCG-------------CCCCAAGCC-TTCTGGCCGAGGGCACGTCTGCCTGGGTGTC---ACAAAT----CGTCG-------------------TCC---------------------CC---C------CATC--CTCT-----C-----------------------GAG---GAT----------------A-TCGGACG----GAAGCTGGTC-TCCCGTGTG----T---TACCG-CACGCGGTTGGCCAAAAT----CCGAGCTA-AGGATG-CCAAGAGCG--TCTT-GACATGCAG----TGGTG------------------AA----------------TTCA-----…
609	>M01634_72_000000000-C3HGL_1_2104_14469_12215	M01634_72_000000000-C3HGL_1_2104_14469_12215	TGCAGAATCCCGTGAACCATCGAGTCTTTGAACGCA-AGTTGCG-------------CCCGACGCC-ATTAGGTTGAGGGCACGTCTGCCTGGGTGTC---ACATAT----CGAAG--------------------CC---------------------CT-------------TCCCCAA-----ATTAA--ACTTGGT-----------------GT----------------G-CAGGGTG----AATGATGGCT-TCCCGTGAG----CCATTTGCT-CCCATGGTTGGCTGAAAA----TTGAGACC-TTGGCA---GGGTGTG--CCAT-GATAGGTGG----TGGCTGTG-TTACGCACGAGACCAA------------GTAAGTCA-----…
526	>M01634_72_000000000-C3HGL_1_2104_15340_9893	M01634_72_000000000-C3HGL_1_2104_15340_9893	TGCAGAATCCCGTGAATCACCGAGTCTTTGAACGCA-AGTTGCG-------------CCCAAAGCC-TTTAGGCTGAGGGCACGTCTGCCTGGTCATC---ACGTAT--CCTGTCG-----CAC------------CC---------------------CC---A---ACCCGTTCCAACT-----C-----------------------GGGCATGAT-----------GGCTGGTGGGATAG----GATATTAGCC-TCCCGTGTA--------CTCGA-GTTACGGTTGGTCTAAAA----TCGAGCCC-CGAGCG---ACGAACG--TCAC-GACAAGTGG----TGGTC------------TGTAATAG------------CTATTTCG-----…
696	>M01634_72_000000000-C3HGL_1_2104_15661_18772	M01634_72_000000000-C3HGL_1_2104_15661_18772	TGCAGAATCCCGTGACCCATCGAGTCTTTGAACGCA-AGTTGCG-------------CCCGAAGCC-ATTAGGCCGAGGGCACGCCTGCCTGGGCGTC---ACACGT----TGTTG--------------------CC---------------------CC---A-----CTAACCCCCTC-----------------------------GGG---AGT--------------TGGGCGGGACG----GATGATGGCC-TCCCGTGTG--------CTCCGTCATGCGGTTGGCATAAAA---AACAAGTCC-TCGGCG---ACTAACA--CCAC-GACAATCGG----TGGTTGTC---------------AA-------------ACCTCTG-----…
596	>M01634_72_000000000-C3HGL_1_2104_16304_22965	M01634_72_000000000-C3HGL_1_2104_16304_22965	TGCAGAATAACGTGATCCATCGAGTCTTTGAACGAA-AGTTGCG-------------CCCCAAGCC-TTCTGGCCGAGGGCACGTCTGCCTGGGTGCC---ACAAAT----CGTCG------------------TCCC---------------------CC---C------CCCATCCTCT-----C-----------------------GAG---GAT----------------A-TGGGACG----GAAGCTGGTC-TCTCGTGTG----T---TAGCG-CATGCGGTTGGCCAAAAT----CAGAGCTA-AGGGCG-CCAGGAGCG--TCTC-GACATGCGG----TGGTG------------------AG----------------TTCA-----…
564	>M01634_72_000000000-C3HGL_1_2104_16510_25644	M01634_72_000000000-C3HGL_1_2104_16510_25644	TGCAGAATCCCGTGAACCATCGAGTCTTTGAACGCA-AGTTGCG-------------CCCCAAGCC-TTCTGGCCGAGGGCACGTCTGCCTGGGTGTC---ACAAAT----CGTCG--------T-----------CC---------------------CC---C------CATC--CTCT-----C-----------------------GAG---GAT----------------A-TCGGACG----GAAGCTGGTC-TCCCGTGTG----T---TACCG-CACGCGGTTGGCCAAAAT----CCTAGCTA-AGGATG-CCAGGAGCA--TCTT-GACATCCGA----TGGTG------------------AA----------------TTCA-----…
587	>M01634_72_000000000-C3HGL_1_2104_17142_27765	M01634_72_000000000-C3HGL_1_2104_17142_27765	TGCAGAATCCCGTGAACCATCGAGTCTTTGAACGCA-AGTTGCG-------------CCCCAAGCC-TTCTGGCCGAGGGCACGTCTGCCTGGGTGTC---ATAAAT----CATCG-------------------CCC---------------------CC---C------CATC--CTCT-----C-----------------------GAG---GAT----------------A-TGGGACG----GAAGCTGATC-TCCCGTGTG----T---TACCG-CACGCGGTTGGCCAAAAT----CCAAGCTA-AGGACA-TCAGAAGCG--TCTT-GACATGCGG----TGGTG------------------AA----------------TTTA-----…
120	>M01634_72_000000000-C3HGL_1_2104_18025_12063	M01634_72_000000000-C3HGL_1_2104_18025_12063	TGTAGAATCCCGTGAACCATCAAGTCTTTGAATGCA-AGTTGCG-------------CCCCAAGCC-TTCTAGCCGAGGGCACGTCTGCCTGGGTGTC---ACAAAT----CGTCG--------T-----------CC---------------------CC---C------CATC--CTCT-----C-----------------------GAT---GAT----------------A-TGGGACG-----AAGCTGATC-TCCCGTGTG----T---TACCG-CACGCGGTTGGCCAAAAT----CCGAACTA-AGGATG-CCAGGAACT--TCTT-GACATGCGC----TGGTG------------------AA----------------TTCA-----…
638	>M01634_72_000000000-C3HGL_1_2104_18854_10184	M01634_72_000000000-C3HGL_1_2104_18854_10184	TGCAGAATCCCGTGAACCATCGAGTCTTTGAGCGCA-AGTTGCG-------------CCCCTAGCC-TTCTGGCCGAGGGCACGTCTGCCTGGGTGTC---ACAAAT----CGTCG--------T-----------CC---------------------CC---C------CATC--CTCT-----C-----------------------GAG---GAT----------------A-TCGGACG----GAAGCTGATC-TCCCCTGTG----T---TACCG-CATGCGGTTGGCCAAAAT----CCGAGCTA-AGGACG-CCAGGAGCA--TCTT-GACATGCGG----TGGTG------------------AA----------------TTCA-----…
504	>M01634_72_000000000-C3HGL_1_2104_20069_2119	M01634_72_000000000-C3HGL_1_2104_20069_2119	TGTAGAATCTCGTGAATCACCAAGTCTTTGAACGCA-AGTTGTG-------------CCCAAAGAC-TTTAGGCTGAGGACACGTATGCCTGGGCGTC---ACGTAT--CCCGTTG-----CAC------------CC---------------------CC---A---ACCCGTCCCAAAT-----C-----------------------GGGCATGAT-----------GGCTAGTGGGAGCG----TATATTGCCC-TCCCATGTA--------CTCGC-GTTACGGTTGGTCTAAAA----TTGAGCCC-CGAGCA---ACGAACG--TCAC-GACAAGTGG----TGGTC------------TGTAATAG------------CTATTTCG-----…
386	>M01634_72_000000000-C3HGL_1_2104_20852_14717	M01634_72_000000000-C3HGL_1_2104_20852_14717	TGCAGAATCACGTGAACCATCGAGTCTTTGAACGCA-AGTTGCG-------------CCCGATGCC-ATTAGGTTGAGGGCACGTCTGCCTGGGTGTC---ACATAT----CGAAG--------------------CC---------------------TC---C---TGCCAATTTCCCT---------------------------TTGATTATTGT----------------G-CAGGGTG----AATGATGGCT-TCCCGTGAG----CACTGCTGC-CTCATGGTTGGTTGAAAA----TTGAGACC-TTGGTA---GGGTGTG--CCAT-GATAGATGG----TGGTTGTGT--------------GA----------------TCCA-----…
215	>M01634_72_000000000-C3HGL_1_2104_21665_23433	M01634_72_000000000-C3HGL_1_2104_21665_23433	TGAAGAATCCCGTGAACCATTGAGTCATTGAATGCA-AGTTGCA-------------CTCGAGGCC-TCCTGGTCGAGGGCTCATCTGCCTGGGTGTC---ACGCAT----CGTCG--------------------CC---------------------CC---C------ACTCCCCTCGACTCAC-----------------------GAG---GGC------------------GGGGGCG----GATATTAGTC-TCCCGCGCG--------CTCCTGCGTGTGGTTGGCCTAAAA----TCAAGTCC-TCGACA---ACTGTCG--CCAC-GACAAGTGG----TGATTGA----------------GA------------GACCCTCG-----…
288	>M01634_72_000000000-C3HGL_1_2104_23242_12058	M01634_72_000000000-C3HGL_1_2104_23242_12058	TGCAGAATCCCGTGAACCATCGAGTCTTTGAACGCA-AGTTGCG-------------CCCGAAGCC-ATTAGGCCGAGGGCACGCCTGCCTGGGTGTC---ACACAT----TGTTG--------------------CC---------------------CC---A---------ATGCCAA-----TCGCCTCGCTTTGT------AGGTATT---TGC----------------T-TGGGGTG----AATGTTGGCC-TCCCGTGAG----C---TTTGT-CTCACGGTTGGTTGAAAA----TCGAGTGC-ATGGTG---TCGGGTGTACCAT-GATGGATGG----TGGTTGAG-TGACGCTCGAGACCAA-----------------TCA-----…
813	>M01634_72_000000000-C3HGL_1_2104_24114_14216	M01634_72_000000000-C3HGL_1_2104_24114_14216	TGCAGAATCCCGTGAACCATCGAGTCTTTGAACGCA-AGTTGCG-------------CCCCAAGCC-TTCTGGCCGAGGGCACGCCTGCCTGGGCGTC---ACACGT----CGTTG--------------------CC---------------------CC---C-----CCAACCCCCTC-----------------------------GGG---AGT--------------TGGGCGGGACG----GATGATGGCC-TCCCGTGTG--------CTTCGTCATGCGGTTGGCATAAAT---ACCAAGTCC-TCGGCG---ACCAACG--CCAC-GACAATCGG----TGGTTGTC---------------AA-------------ACCTCGG-----…
169	>M01634_72_000000000-C3HGL_1_2104_24808_11813	M01634_72_000000000-C3HGL_1_2104_24808_11813	TGCAGAATCCCGTGAACCATCGAGTCTTTGAACGCA-AGTTGCG-------------CCCCAAGCC-TTCTGGCCGAGGGCACGTCTGCCTGGGTGTC---ACAAAT----CGTCG--------------------TT---------------------CC---C------CCTCATCCTT-----C-----------------------AAG---GAT----------------T-CGGGACG----GAAGCTGATC-TCCCGTGTG----T---TACCG-CACGCGGTTGGCCAAAAT----CCGAGCTA-AGGACG-TCAGGAGCG--TCTT-GACATGCGG----TGGTG------------------AA------------CTCGTTCA-----…
538	>M01634_72_000000000-C3HGL_1_2104_24835_17914	M01634_72_000000000-C3HGL_1_2104_24835_17914	TGCAGAATCCCGTGAACCATCGAGTCTTTGAACGCA-AGTTGCG-------------CCCCGAGCC-TTCTGGCCGAGGGCACGTCTGCCTGGGTGTC---ACAAAT----CATCG-------T------------CC---------------------CC---C------CATC--CTCT-----C-----------------------GAG---GAT----------------A-TGGGACG----GAAGCTGATT-TCCCGTGTG----T---TACCG-CACGCGGTTGGCCAAAAT----CCGACCTA-AGGACG-CCATGAGCG--TCTT-GACATGCGG----TGGTG------------------AA----------------TTCA-----…
344	>M01634_72_000000000-C3HGL_1_2104_25482_20005	M01634_72_000000000-C3HGL_1_2104_25482_20005	TGCAGAATCCCGTGAACCATCGAGTCTTTGAACGCA-AGTTGCA-------------CCCCAAGCT-TTCTGGCCGAGGGCACGTCTGGCTGGGTGTC---ACAAAT----ATTCG--------T-----------CC---------------------CC---C------CATC--CTCT-----C-----------------------GAG---GAT----------------A-GGGGACG----GAAGCCGATC-TCCAGTGTG----T---TACCG-CATGCGGTTGGCCAAAAT----CCAAGCTA-CGGACG-CTAGGAGCG--TCTT-GACATGCGG----TGGTG------------------AA----------------TTCA-----…
441	>M01634_72_000000000-C3HGL_1_2104_26881_13653	M01634_72_000000000-C3HGL_1_2104_26881_13653	TGCAGAATCCCGTGAACCATCGAGTCTTAGAACGCA-AGTTGCG-------------CCTGATGCC-ATTAGGTTGAGGGCACGTCTGCCTGGGCGTC---ACATAT----CGAAG--------------------CC---------------------TC---T---TGCCAATTTCC--------T-AT-------------------T-G----A--------------T-TG----G-T------A-------------GTGAG----CAC-CATCGCCTCATGGTTGGTTGAAAA----TCGAGACC-TTGGTA-----GAGTGTGCCAT-GATAAATGG----TGCATGTGTTAAGCACGAGACCAAA-------------------------…
569	>M01634_72_000000000-C3HGL_1_2104_28043_17375	M01634_72_000000000-C3HGL_1_2104_28043_17375	GGGGGGGGGGGGGGGGGGGGGGGGGGGGGGGGGGGA-AGGGGCG-------------CCCCAAGCC-TTCTGGCCGAGGGCACGTCTGCCTGGGTGTC---ACAAAT----CGTCG-------T------------CC---------------------CC---C------CATC--CTCT-----C-----------------------GAG---GAT----------------A-TCGGACG----GAAGCTGGTC-TCCCGTGTG----T---TACCG-CACGCGGTTGGCCAAAAT----CCTAGCTA-AGGATG-CCAGGAGCG--TCTT-GACATGCGG----TGGTG------------------AA----------------TTCA-----…
792	>M01634_72_000000000-C3HGL_1_2104_4700_16986	M01634_72_000000000-C3HGL_1_2104_4700_16986	TGCAGAATCCCGTGAACCATCGAGTCTTTGAACGCA-AGTTGCG-------------CCCGATGCC-ATTAGGTTGAGGGCACGTCTGCCTGGGTGTC---ACAAAT----CGTCG--------T-----------CC---------------------CC---C------CATC--CTCT-----C-----------------------GAG---GAT----------------A-TGGGACG----GAAGCTGATC-TCCCGTGTG----T---TACCG-CACGCGGTTGGCCAAAAT----CCAAGCTA-AGGACG-CCAGAAGCG--TCTT-GACATGCGG----TGGTG------------------AA----------------TTTA-----…
702	>M01634_72_000000000-C3HGL_1_2104_5013_20277	M01634_72_000000000-C3HGL_1_2104_5013_20277	TGCAGAATCCCGTGAACCATCGAGTCTTTGAACGCA-AGTTGCG-------------CCCGAAGCC-ATTAGGCCGAGGGCACGTCTGCCTGGGCGTC---ACACGT----CGTTGCC------------------CC---------------------CC---C-----CCAACCCCCTC-----------------------------GGG---AGT--------------TGGGCGGGACG----GATGATGGCC-TCCCGTGTG--------CTTCGTCTTGCGGTTGGCATAAAA---AATAAGTCC-TCGGCG---ACTAACG--CCAC-GACAATCGG----TGGTTGTC---------------AA-------------ACCTCGG-----…
703	>M01634_72_000000000-C3HGL_1_2104_7727_4008	M01634_72_000000000-C3HGL_1_2104_7727_4008	TGCAGAATCCCGTGAACCATCGAGTCTTTGAATGCA-AGTTGCG--------------CCCAAGCC-TTCTGACTGAGGGCACGTCTGCCTGGGTGTC---ACAAAT----CGTCG-------T------------CC---------------------CC---C------AATC--CTCT-----C-----------------------GAG---GAT----------------A-TCCGACG----GAAGCTGGTC-TCAAGTGTG----T---TACCG-CACGCGGTTGGCCAAAAT----CCGAGCTA-AGGATG-CCAGGAGCG--TCTT-GACATGCGG----TGGTG------------------AA----------------TTTA-----…
706	>M01634_72_000000000-C3HGL_1_2104_8184_20578	M01634_72_000000000-C3HGL_1_2104_8184_20578	TGCAGAATCCCGTGAACCATTGAGTCATTGAACGCA-AGTTGCG-------------CCCCGAGCC-TTCTGGCCGAGGGCACGTCTGCCTAGGTGTC---ACAAAT----CGTCG--------T-----------CC---------------------CC---C------CATC--CTCT-----C-----------------------AAG---GAT----------------A-TGGGACA----GAAGCTGATC-TCCCGTGTG----T---TACCG-CACGCGGTTGGCCAAAAT----CCGAGCTA-AGGACG-TCAGGAGCG--TCTT-GACATGCGG----TGGTG------------------AA----------------TTTA-----…
612	>M01634_72_000000000-C3HGL_1_2104_8488_9519	M01634_72_000000000-C3HGL_1_2104_8488_9519	TGCAGAATCCCGTGAACCATCGAGTCTTTGAACGCA-AGTTGCG-------------CCCCAAGCC-TTCTGGCCGAGGGCACGTCTGCCTGGGTGTC---ACAAAC----CGTCG-------------------TCC---------------------CT---C------TCAT--CCTT-----C-----------------------TCG---GAT----------------A-TGGGACG----GAAACTGGTC-TCCCGTGTG----T---TACCG-CACGCGGTTGGCCAAAAT----CCGAGCTA-AGGGCG-CCTAGAGCG--TCTT-GACATGCGG----TGGTG------------------AA----------------TTTA-----…
762	>M01634_72_000000000-C3HGL_1_2104_8842_24319	M01634_72_000000000-C3HGL_1_2104_8842_24319	TGCAGAATCCCGTGAACCATCGAGTCTTTGAACGCA-AGTTGCG-------------CCCCAAGCC-TTCTGGCCGAGGACACGTCTTCCTGGGTGTC---ACAAAT----CA-----------------------TC---------------------CC---C--------CGTCCTCT-----C-----------------------GAG---GAT----------------A-TGGGACG----GAAGCTGATC-TCCCGTGTG----T---TACCG-CACGCGGTTGGCCAAAAT----CCAAGCTA-AGGACG-TCAGAAGCG--TCTT-GACATGCGG----TGGTG------------------AA----------------TTTA-----…
539	>M01634_72_000000000-C3HGL_1_2104_9838_21885	M01634_72_000000000-C3HGL_1_2104_9838_21885	TGCAGAATCCAGTGAACCATCGAGTCTTTGAACGCA-AGTTGCG-------------CCCCAAGCC-TTCTGGCCGAGGGCACGTCTGCCTGGGTGTC---ACAAAT----CGTCG-------------------TCC---------------------CC---C------CATC--CTCT-----C-----------------------GAG---GAT----------------A-TGGGACG----GAAGCTGATC-TCCCGTGTG----T---TACCG-CACGCGGTTGGCCAAAAT----CCGAGCTA-AGGACG-CCAGGAGTG--TCTT-GACATGCAG----TGGTG------------------AA----------------TTCA-----…
537	>M01634_72_000000000-C3HGL_1_2105_10109_15008	M01634_72_000000000-C3HGL_1_2105_10109_15008	TGCAGAATCCCGTGAACCATCGAGTCTTTGAACGCA-AGTTGCG-------------CCCCAAGCC-TTCTGGCCGAGGGCACGTCTGCCTGGGTGTC---ACAAAT----CGTCG-------------------TCC---------------------CC---C------CATC--CTCT-----C-----------------------GAG---GAT----------------A-TGGGACG----GAAGCTGGTC-TCCCGTGTG----T---TACCG-CACGCGGTTGGCCAAAAT----CCGAGCTA-AGGACG-TCAGAAGCA--TATT-GACATGCGG----TGGTG------------------AA----------------TTTA-----…
255	>M01634_72_000000000-C3HGL_1_2105_10112_4533	M01634_72_000000000-C3HGL_1_2105_10112_4533	TGCAGAATCCCGTGAACCATCGAGTCTTTGAACGCA-AGTTGCG-------------CCCGAAGCC-TTCTGGCCGAGGGCACGTCTGCCTGGGTGTC---ACAAAT----CGTCG--------------------TC---------------------CC---C---C--CATC--CTCT-----C-----------------------GAG---GAT----------------A-TGGGACG----GAAGCTGATC-TCCCGTGTG----T---TACCG-CACGCGGTTGGCCAAAAT----CCGAGCTA-AGGATG-CCTTGAGCG--TCCC-GACATGCGG----TGGTG------------------AA------------CTCGTTCA-----…
806	>M01634_72_000000000-C3HGL_1_2105_10777_9489	M01634_72_000000000-C3HGL_1_2105_10777_9489	TGCAGAATCCCGTGAACCATCGAGTCTTTTAACGCA-AGTTGCG-------------CCCCAAGTC-TTCTGGCCGAGGGCACGTCTGCCTTGGTGTC---ACAAAT----CGTCG-------------------TCC---------------------CC---C------CATC--CTCT-----C-----------------------GAG---GAT----------------A-TGGGACG----GAAGCTGATC-TCCCGTGTG----T---TACCG-CACGCGGTTGGCCAAAAT----CTGAGCTA-AGGATG-TCAGAAGCG--TCTT-GACATGCGG----TGGTG------------------AA----------------TTTA-----…
470	>M01634_72_000000000-C3HGL_1_2105_13962_23287	M01634_72_000000000-C3HGL_1_2105_13962_23287	TGCAGAATCCCGTGAATCACCGAGTCTTTGAACGCA-AGTTGCG-------------CCCAAAGCC-TTTAGGTTGAGGGCACGTCTGCCTGGGCGTC---ACGTAT--CCCGTCG-----CAC------------CC---------------------CC---A---ACCCGTCCCAACT-----C-----------------------GGGCATGAT-----------GGCTGGTGGGAGCG----GATATTGGCC-TCCCGTGTA--------CTCGT-GTTATGGTTGGTATAAAA----TCGAGCCC-TGAGCG---ACGAATG--TGGG-AGCTCACAA----AGATC-------------CCAA-AG------------CATCGTTA-----…
747	>M01634_72_000000000-C3HGL_1_2105_14209_22891	M01634_72_000000000-C3HGL_1_2105_14209_22891	TGCAGAATCCCGTGAACCATCGAGTCTTTGAACGCA-AGTTGCG-------------CCCCAAGCC-TTCTGGCCGAGGGCACGCCTGCCTGGGTGTC---ACAAAT----CGTCG-------------------TCC---------------------CC---C------CATC--CTCT-----C-----------------------GAG---GAT----------------A-TGGGACG----GAAGCTGATC-TCCCGTGTG----T---TACCG-CACGCGGTTGGCCAAAAT----CCAAGCTA-AGGACG-TCAGAAGCG--TCTT-GACATACGG----TGGTG------------------AA----------------TTTA-----…
84	>M01634_72_000000000-C3HGL_1_2105_15448_15848	M01634_72_000000000-C3HGL_1_2105_15448_15848	TGCAGAATCCCGTGAACCATCAAGTATTTGAACGCA-AGTTGCG-------------CCCCAATCC-TTCTGGCCGAGGGCACGTCTGCTTGGGTGTC---ACAAAT----CGTCG--------------------TC---------------------CC---C------CATC--CTCT-----C-----------------------GAG---GAT----------------A-TGGGACA----GAAGTTGATC-TCACGTGTG----T---TACCG-TACGCTGTTGGCCAAAAT----CCGAGCTA-AGGAAG-CCAGGAGTG--TCTT-GACATGCAG----TGGTG------------------AA----------------TTCA-----…
793	>M01634_72_000000000-C3HGL_1_2105_16321_5986	M01634_72_000000000-C3HGL_1_2105_16321_5986	TGCATAATCCCGTGAACCATCGAGTCTTTGAACGCA-AGTTGCG-------------CCCCAAGCC-TTCTGGCCGAGGGCACGTCTGCCTGGTTGTC---ACAAAT----CGTCG--------T-----------CC---------------------CC---C------CATC--CTCT-----C-----------------------GAG---GAT----------------A-TCGGACG----GAAGCTCTCC-TCCCGTGTG----T---TACCG-CACACGGTTGGCGAAAAT----CCGAGCTA-AGGATG-CCAGGAGCG--TCTT-GACATGCGG----TGGTG------------------AA----------------TTCA-----…
733	>M01634_72_000000000-C3HGL_1_2105_16363_3466	M01634_72_000000000-C3HGL_1_2105_16363_3466	CGAGATCTCCACTCGCGGGTCCTGGTGCTGGTATGCGATACTTGGTGTGAATTGCAGAATCCCGTGAACCATCGAGTCTTTGAACGCA-AGTTGCG-------------CCCCAAGCC-TTCTGGCCGAGGGCACGTCTGCCTGGGTGTC---ACAAAC----CGTCG--------------------TC---------------------CC---T---CTCATCCTTCTCG-----------------------------------GAT----------------A-TGGGACG----GAAACTGGTC-TCCCGTGTG----T---TACCG-CACGCGGTTGGCCAAAAT-----------------------------------------------…
624	>M01634_72_000000000-C3HGL_1_2105_16688_3236	M01634_72_000000000-C3HGL_1_2105_16688_3236	CGTGCTCTACTCCCTCTCTGCCTGGTGCTGGTATGCGATACTTGGTGTGAATTGCAGAATCCCGTGAACCATCGAGTCTTTGAACGCA-AGTTGCG-------------CCCCAAGCC-TTCTGGCCGAGGGCACGTCTGCCTGGGTGTC---ACAAAC----CGTCG--------------------TC---------------------CC---T---CTCATCCTTCTCG-----------------------------------GAT----------------A-TGGGACG----GAAATTGGTC-TCCCGTGTG----T---TACCG-CACGCGGTTGGCCAAAAT-----------------------------------------------…
67	>M01634_72_000000000-C3HGL_1_2105_17043_23404	M01634_72_000000000-C3HGL_1_2105_17043_23404	TGCAGAATCCCGTGAACCATCGAGTTTTTGAACGCA-AGTTGCG-------------CTCGAGGCC-TCCTGGTCGAGGGCACGTCTGCCTGGGTGTC---ACGCAT----CGTCG--------------------CC---------------------CC---C------ACTCCCCTTGGCTCAC-----------------------GAG---GGT------------------GGGGGCG----GATACTGGTC-TCCCGCGCA----C---TCACG-CCCGTGGTTGGCCTAAAC----TCGAGTCC-TCAGCG---ACGGTCA--CCAC-GACAAGCGG----TGGTTGA----------------GA------------GACCCTCA-----…
561	>M01634_72_000000000-C3HGL_1_2105_17680_11662	M01634_72_000000000-C3HGL_1_2105_17680_11662	TGCAGAATCCCGTGAACCATCGAGTCTTTGAACGCA-AGTTGCG-------------CCCGATGCC-ATTAGGTTGAGGGCA-------C-----GT-----C---T--------G--------------------CC---------------------CT----------TCCCCAAATT-----------------------------AAACTTGGT---------------GTGCAGGGTG----AATGATGGCT-TCCCGTGAG-----CCATTTGGTCTCATGGTTGGCTGAAAA----TTGAGACC-TTGGCA---GGGTGTG--CCAT-GATTAATGG----TGGTTGTGTGACGCACGAAGCCCAA-------TCATGATCATTGC-----…
556	>M01634_72_000000000-C3HGL_1_2105_18253_1694	M01634_72_000000000-C3HGL_1_2105_18253_1694	TGCAGAATCCCGTGAACCATCGAGTCTTTGAACGCA-AGTTGCG-------------CCCGAAGCC-ATTAGGCCGAGGGCACGCCTGCCTGGGTGTT---GCACAT----CGTTG--------------------CC---------------------CC---C---GTGCCTTGGCCAC-----GTGCC-------------------AGG---CAC-----------CA--AG-CGGGGCG----AATGTTGGCT-TCCCGCGAG----C---AATGT-CTCACGGTTGGTTGAAAA----CTGAGTCC-GCGGTG---GAGGGCG--CCGT-GATGGATGG----TGGCTGAGTTAAAGCTCGAGACCGA-----------------TCG-----…
741	>M01634_72_000000000-C3HGL_1_2105_21057_22816	M01634_72_000000000-C3HGL_1_2105_21057_22816	TGCAGAATCCCGTGAACCATCGAGTCTTTGAATGCA-AGTTGCG-------------CCCCAAGCC-TTCTGGCCGAGGGCACGTCTGCCTGGGTGTC---ACAAAT----CGTCG-------------------TCC---------------------CC---C------CATC--CTCT-----C-----------------------GAG---GAT----------------A-TGGGACG----GAAGCTGATC-TCCCGTGTG----T---TACCG-CACGCGGTTGGCCAAAAT----CCGAGCTA-AGGACG-TCAGGAGCG--TCTT-GACATGCGG----TGGTG------------------AA----------------TTTA-----…
287	>M01634_72_000000000-C3HGL_1_2105_22367_24214	M01634_72_000000000-C3HGL_1_2105_22367_24214	GGGGGGGGGGGGGGGGGGGGGGGGGGGGGGGAGGCA-AGGTGCG-------------CCCGAAGCC-ATTAGGCCGAGGGCACGCCTGCCTGGGTGTT---GCACAT----CGTTG--------------------CC---------------------CC---C---GTGCCTTGGCCAC-----GTGCC-------------------AGG---CAC-----------CA--AG-CGGGGCG----AATGTTGGCT-TCCCGCGAG----C---AATGT-CTCACGGTTGGTTGAAAA----CTGAGTCC-GCGGTG---GAGGGCG--CCGT-GATGGATGG----TGGCTGAGTTAAAGCTCGAGACCGA-----------------TCG-----…
190	>M01634_72_000000000-C3HGL_1_2105_22437_4245	M01634_72_000000000-C3HGL_1_2105_22437_4245	TGCAGAATCCCGTGAACCATCGAGTCTTTGAACGCA-AGTTGCG-------------CCCGAAGCC-GTTAGGCCGAGGGCACGTCTGCCTGGGCGTC---ACACGT----CGTTG--------------------CC---------------------CC---C-----CCGACCCCTTC-----------------------------GGG---GGT--------------CGGACGGGACG----GATGATGGCCTTCCCGTGTG--------CCCCGTCACGCGGTTGGCATAAAT---ACCTAGTCC-TCGGCG---AACGGCG--CCGC-GACGATCGG----TGGTTGTC---------------AA------------ACCTCGGTGCCT-…
167	>M01634_72_000000000-C3HGL_1_2105_25004_6628	M01634_72_000000000-C3HGL_1_2105_25004_6628	TCATAATCCCGTGAACCATCGAGTCTTTGAACGCA-AGTTGCG-------------CCCCAAGCC-TTCTGGCCGAGGGCACGTCTGCCTGGGTGTC---ACAAAT----CGTCG--------T-----------CC---------------------CC---C------CATC--CTCT-----C-----------------------GAG---GAT----------------A-TCGGACG----GAAGCTGGTC-TCCCGTGTG----T---TACCG-CACGCGGTTGGCCAAAAT----CCTAGCTA-AGGATG-CCAGGAGCG--TCTT-GACATGCGG----TGGTG------------------AA----------------TTCA------…
458	>M01634_72_000000000-C3HGL_1_2105_25154_22324	M01634_72_000000000-C3HGL_1_2105_25154_22324	TGCAGAATTCCGTGAACCATCGAGTCTTTGAATGCA-AGTTGCG-------------CCCCAAGCC-TTCTGGCCGAGGGCACGTCTGCCTGGGTGTC---ACAAAT----TGTTG--------T-----------CC---------------------AC---C------CATC--CTCT-----C-----------------------GAG---GAT----------------A-TGGGACG----GAAGCTGATC-TCCCGTGTG----T---TACCG-CACGCGGTTGGCCAAACT----CCGAGCTA-AGGACG-CCAGGAGCG--CCTT-AACATGCGG----TGGTG------------------AA----------------TTCA-----…
379	>M01634_72_000000000-C3HGL_1_2105_25421_14301	M01634_72_000000000-C3HGL_1_2105_25421_14301	TGCAGAATCCCGTGAACCATCGAGTCTTTGAACGCA-AGTTGCG-------------CCCGAGGCC-TCCTGATCGAGGGCACTTCTGCCTGGGTGTC---ACGCAT----CGTCG--------------------CC---------------------AC---C------ACTCTCCTCGACTCAC-----------------------GAG---GAC------------------AAGGGCG----AATACTGGTC-TCCCGCGCG----C---TCCCG-CCCGTGGTTGGCCTAAAA----TCGAGTCC-CCGGCG---ACGGTCG--CCAC-GACAAGCGG----TGGTTGAG---------------AG-------------------------…
573	>M01634_72_000000000-C3HGL_1_2105_26372_7901	M01634_72_000000000-C3HGL_1_2105_26372_7901	TCAGAATCCCGTGAACCATCGAGTCTTTGAACGCA-AGTTGCA-------------CCCCAAGCC-TTCTGGCCGAGGGCACGTCTGCCTGGGTGTC---ACAAAT----CGTCG-------------------TCC---------------------CC---C------CATC--CTCT-----C-----------------------GAG---GAT----------------A-TGGGATG----GAAGCTGATC-TCCCGTGTG----T---TACCG-CACGCGGTTGGCCAAAAT----CCGAGCTA-AGGACG-TCAGTAGCG--TCAT-GACATGCGG----TGGTG------------------AA----------------TTTA------…
628	>M01634_72_000000000-C3HGL_1_2105_28023_19893	M01634_72_000000000-C3HGL_1_2105_28023_19893	TGCAGAATCCCGTGAACCATCGAGTCTTTGAACGCA-AGTTGCG-------------CCCCAAGCC-TTCTGGCCGAGGGCACGTCTGCCTGGGTGTC---ACAAAT----TGTCG-------------------TCC---------------------CC---C------CATC--CTCT-----C-----------------------GAG---GAT----------------A-TGGGACG----GAAGCTGATC-TCCCGTGTG----T---TACCG-CACGAGGTTGGCCAAAAT----CCGAGCTA-AGGACG-CCAGGAGCG--TCTT-GACATGTGG----TGGCG------------------AA----------------TTCA-----…
767	>M01634_72_000000000-C3HGL_1_2105_28458_18702	M01634_72_000000000-C3HGL_1_2105_28458_18702	TGCAGAATCCCGTGAACCATCGAGTCTTTGAACGCA-AGTTGCG-------------CCCGAAGCC-GTTAGGCCGAGGGCACGTCTGCCTGGGCGTC---ACACGT----CGTTG--------------------CC---------------------CC---C---C--CGAC-CCCTT-----C-----------------------GGG---GGT-----------CG--GA-CGGGACG----GATGATGGCCTTCCCGTGTG--------CCCTGTCACGCGGTTGGCATAAAT---ATCAAGTCC-TTGGCG---ACTAACG--CCAC-GACAATCGG----TGGTTGT----------------CA------------AACCTCGG-----…
723	>M01634_72_000000000-C3HGL_1_2105_28778_20190	M01634_72_000000000-C3HGL_1_2105_28778_20190	TGCAGAATCCCGTGAACCATCGAGTCTTTGAACGCA-AGTTGCG-------------CCCCAAGCC-TTCTGGCCGAGGGCACGTCTGCCTGGGTGTC---ACAAAT----CGTCT-------T------------CC---------------------CC---C-----CTATC--CTCT-----C-----------------------GAG---GAT----------------A-TGGGACG----AAAGCTGATC-TCCCATGTG----T---TACCG-CACGCGGTTGGCCAAAAT----CCTAGCTC-AGGACG-TCAGGAGCG--TCAT-GACATGCGG----TGGTG------------------AA----------------TTCA-----…
269	>M01634_72_000000000-C3HGL_1_2105_4081_9244	M01634_72_000000000-C3HGL_1_2105_4081_9244	TGCAGAATCCCGTGAACCATCGAGTCTTTGAACGCA-AGTTGCG-------------CCCCGAGCC-TTTTGGTCGAGGGCACGTCTGCCTGGGTGTC---ACAAAT----CCTCG--------T-----------CC---------------------CC---C------CATC--CTCT-----T-----------------------GAG---GAT----------------A-TGGGACG----AAAGCTGATT-TCCCGTGTG----T---TACCG-CACGCGGTTGGCCAAAAT----CCAACCTA-AGGACG-CCATGAGCG--TCTT-GACATGCGG----TGGTG------------------AA----------------TTCA-----…
482	>M01634_72_000000000-C3HGL_1_2105_6191_8613	M01634_72_000000000-C3HGL_1_2105_6191_8613	TGCAGAATCCCGTGAATCACCGAGTCTTTGAACGCA-AGTTGCG-------------CCCAAAGCC-TTTAGGTTGAGGGCACGTCTGCCTGGGCGTC---ACGTAT--CCCGTCG-----CAC------------CC---------------------CC---A---ACCCGTCCCAACT-----C-----------------------GGGCATGAT-----------GGCTGGTGGGAGCG----GATATTGGCC-TCCCGTGTA--------CTCGC-GTTACGGTTGGTCTAAAA----TTGAGCCC-CGAGCG---ACGAATG--TCAC-GACAAGTGG----TGGTC------------TGTAATAG------------CCATTTCG-----…
633	>M01634_72_000000000-C3HGL_1_2105_6880_25168	M01634_72_000000000-C3HGL_1_2105_6880_25168	TGCAGAATCCCGTGAACCATCGAG-TCTTTGA-------------ACGCAAG---TT-GCACCGAGGGCATGTCTGCTTGGGTGTC---ACAAAT----CGTTG-------------------TCC---------------------CC---C------CATC--CTCT-----C-----------------------GAG---GAT----------------A-TGGGACG----GAAGCTGATC-TCCCGTGTG----T---TACCG-CACGCGGTTGGCCAAAAT----CCGAGCTA-AGAACG-TCAGGAGCG--TCTT-GACATGCGG----TGGTG------------------AA----------------TTTA-----------------…
643	>M01634_72_000000000-C3HGL_1_2106_10169_24762	M01634_72_000000000-C3HGL_1_2106_10169_24762	TGCAGAATCCCGTGAACCATCGAGTCTTTGAACGCA-AGTTGCG-------------CCCGATGCC-ATTAGGTTGAGGGCACGTCTGCCTGGGTGTC---ACAAAT----CGTCG--------T-----------CC---------------------CC---C------CATC--CCCT-----C-----------------------GAG---GAT----------------A-TCGGACG----GAAGCTGGTC-TCCCGTGTG----T---TACCG-CACGCGGTTGGCCAAAAT----CCTAGCTA-AGGATG-CCAGGAGCG--TCTT-GACATGCGG----TGGTG------------------AA----------------TTTA-----…
495	>M01634_72_000000000-C3HGL_1_2106_15829_21469	M01634_72_000000000-C3HGL_1_2106_15829_21469	TGTAGAATCCCGTGAATCACCGAGTCTTTGAACGCA-AGTTGCG-------------CCCAAAGCC-TTTAGGCTGAGGGCACGTCTGCCTGGGTGTC---ACATAT--CCCGTCG-----CAC------------CC---------------------CC---A---ACCCGTCCCAACT-----C-----------------------GGGCATGAT-----------GGATGGTGGGAGCG----GATATTAGCC-TCCCATGTA--------CTCGC-GTTATGATTGGTCTAAAA----TCGAGCCC-TGAGCA---ACAAACG--TCAC-TACAAGTGG----TGGTC------------TGTAAAAG------------CTATTTCG-----…
391	>M01634_72_000000000-C3HGL_1_2106_18474_9470	M01634_72_000000000-C3HGL_1_2106_18474_9470	TGCAGAATCCCGTGAACCATCGAGTCTTTGAACGCA-AGTTGCG-------------CCCGATGCC-ATTAGGTTGAGGGCACGCCTGCCTGGGCGTC---ACGCAC-TG-AGTCG--------------------CC---------------------CC---T--------TCTTCTCC-----------------------------GAG---GAG------------A--GA-TGGAGCG----GAGATTGGCC-CCCCGTGC---------TTCCG-AGTGCGGTCGGCCTAAAA----CTTGGCCC-TTGGAG---GCCGGCG--TCAC-GATCCGTGG----TGGTTGGC---------------------------------ATCA-----…
78	>M01634_72_000000000-C3HGL_1_2106_18751_6618	M01634_72_000000000-C3HGL_1_2106_18751_6618	CGCAGAATCCCATGAACCATCGAGTCTTTGAACGCA-AGTTGCG-------------CCCCAAGCC-TTCTGGCCGAGGGCACGTCTGCCGGGATGTC--------------------------------------------------------------------------------------------------------------------------------------------------------AGCTGATC-TCCCATGCG----T---TACCG-CACGCGGTTGGCCAAAAT----CCAAGCTA-AGGACG-CCAGGAGCG--TCTT-GACATGCGG----TGGTG------------------AA----------------TTCA-----…
82	>M01634_72_000000000-C3HGL_1_2106_19660_28188	M01634_72_000000000-C3HGL_1_2106_19660_28188	TGTAGAATCCCGTGAACCATCAAGTCTTTGAATGCA-AGTTGCG-------------CCCCAAGCC-TTCTGGCCGAGGGCACGTCTGCCTGGGTGTC---ACAAAT----CGTCG--------T-----------CC---------------------TC---C------CATC--CTCT-----C-----------------------GAG---GAT----------------A-TGGGACG----GAAGCTGATA-TCCCGTGTG----T---TACCG-CACGCGGTTGGCCAAAAC----CCAAGCTA-TGGACG-CCAGGAGCG--TCTT-GACATGCGG----TGGTG------------------AA----------------TTCA-----…
759	>M01634_72_000000000-C3HGL_1_2106_20470_7238	M01634_72_000000000-C3HGL_1_2106_20470_7238	TGCAGAATCCCATGAAC----------------GCA-AGTTGCG-------------CCCCAAGCC-TTCTCGCCGAGGGCACGTCTGCCAGGGTGTC---ACAAAT----CATCG--------T-----------CC---------------------CC---C------CATC--CTCT-----C-----------------------AGG---GAT----------------A-TGGGATG----GAAGCTGATC-TCCCGTGTG----T---TACCG-CATGCGGTTGGCCAAAAT----CCGAGCTA-AGGACG-CCAGGAGCG--TCTT-AAAATGCAG----TGGTG------------------AA----------------TTCG-----…
751	>M01634_72_000000000-C3HGL_1_2106_20989_5111	M01634_72_000000000-C3HGL_1_2106_20989_5111	TGAAGAATCCCGTGAACCATCGAGTCATTGAATGCA-AGTTGCA-------------CTCGAGCCC-TCCTGGTTGAGGGCTCATCTGCCTGGGTGTC---ACAAAT----CGTCG--------------------CC---------------------CC---C------ACTCCCCTCGACTCAC-----------------------GAG---GGC------------------GGGGGCG----GATATTGGTC-TCCCGCGCG--------CTCCTGCGTGTGGTTGGCCTAAAA----TCGAGTCC-TCGACA---ACGGTCA--CCAC-GACAAGTGG----TGATTGA----------------GA------------GACCCTCG-----…
324	>M01634_72_000000000-C3HGL_1_2106_23634_15883	M01634_72_000000000-C3HGL_1_2106_23634_15883	TGCAGAATCCCGTGAACTCTTTGAACGCA-AGTTGCG-------------CCCCAAGCC-TTCTGGCCGAGGGCACATCTGCCTGGGTGTC---ACAAAT----CGTCG-------------------TCC---------------------CC---C------CATC--CTCT-----C-----------------------GAG---GAT----------------A-TGGGACG----GAAGCTGATC-TCCCGTGTG----T---TACCG-CGCGCGGTTGGCCAAAAT----CCAAGCTA-AGGACA-TCAGAAGCG--TCTT-GACATGCGG----TGGTG------------------AA----------------TTTA------------…
530	>M01634_72_000000000-C3HGL_1_2106_24583_18010	M01634_72_000000000-C3HGL_1_2106_24583_18010	TGCAGAATCCCGTGAACCATCGAGTCTTTGAACGCA-AGTTGCG-------------CCCGAAGCC-TTCTGGTTGAGGGCACGTCTGCCTGGGCGTC---ACACAC--AGCGTCG--------------------CT---------------------CT---A---CACCAACCTAGTT-----------------------------------GGT----------------A-GGGAGCG----GATATTGGCC-CCCCGAGTC--------CTTTG-GGCACGGTCGGCACAAAT----ATTGGTCC-CCGGCA---GCGAGTG--TCGC-GGTCAGCGG----TGGTTT-----------------AT------------ATCCTCCAAAGAC…
457	>M01634_72_000000000-C3HGL_1_2106_25936_20425	M01634_72_000000000-C3HGL_1_2106_25936_20425	TGCAGAATCCCGTGAACCATCGAGTCTTTGAACGCA-AGTTGCG-------------CCCGAAGCC-ATCAGGCCGAGGGCACGCCTGCCTGGGCGTC---ACACGC----CGTTG--------C-----------CC---------------------CC---C-----CGCGCATCCCT-----C-----------------------GGG---AGC-----------GTC-GG--GGGGCG----GACGATGGCC-TCCCGTGCG----T---CACCC-CGCGCGGTTGGCACAAAT---GCCGGGTCC-TCGGCG---ACGAACG--CCAC-GACAATCGG----TGGTCG--------TCGAACCTCGG-----------------TTG-----…
163	>M01634_72_000000000-C3HGL_1_2106_28141_12798	M01634_72_000000000-C3HGL_1_2106_28141_12798	TGCAGAATCCTGTGACCCATCGAGTCATTGAACGCA-AGTTGCG-------------CGCCAAGCC-TTCTGGCCGAGGACACGTTTGCCTGGGTGTC---ACAAAT----CATC--------------------------------------------CC---C------CATC--CTCT-----C-----------------------GAG---GAT----------------A-TGGGACG----AAAGCTGATC-TCCCATGTG----T---TACCG-CATGTGGTTGGCCAAAAT----CCGAGCTA-AGGACA-CCATGAGCG--TCTT-GACATGCGG----TGGTG------------------AA----------------TTCA-----…
524	>M01634_72_000000000-C3HGL_1_2106_3479_20445	M01634_72_000000000-C3HGL_1_2106_3479_20445	TATAGAATCCCGTGAATCACCGAGTCTTTAAACGCA-AGTTGTG-------------CCCAAAGCC-TTTAGGTTGAGGGCACGTCTGCCTGGGCGTC---ACGTAT--CCCGTCG-----CAC------------AC---------------------CC---A---ACCCGTCCCAACT-----C-----------------------GGGCATGAT-----------GGCTGGTGGGAGCG----GATATTGGCC-TCCCGTGTA--------CTCGC-GTTACGGTTGGTCTAAAA----TCGAGCCC-CGAGCG---ACGAACG--TCAC-GACAAGTGG----TGGTC------------TGTAATAG------------CTATTTCG-----…
257	>M01634_72_000000000-C3HGL_1_2106_4186_9535	M01634_72_000000000-C3HGL_1_2106_4186_9535	TGTAGAATCCCGAGAACAATCGAGTCTTTGAACGCT-AGTTGCA-------------CCCCAAGCC-TTCTGGCCGAGGGCATGTCTGCTTGGGTGTC---CAAAAT----CGTTG--------T-----------CC---------------------CC---C------CATC--CTCT-----C-----------------------GAG---GAT----------------A-TGGGACG----GAAGCTGATC-TCCCATGTG----T---TACCG-CACGCGGTTGGCCAAAAT----CCGAGCTA-AGGACG-CCAGGAGCA--TCTT-GACATGCGG----TGGTG------------------AA----------------TTCA-----…
525	>M01634_72_000000000-C3HGL_1_2106_4611_22336	M01634_72_000000000-C3HGL_1_2106_4611_22336	TATAGAATCCTATGAATCACCGAGTCTTTGAACGTA-AGTTGCG-------------CTCAAAACC-TTTAGGCTGAGGGCACGTCTTCCTGGGTATC---ACGTAT--CCCGTCA-----CAC------------CC---------------------CC---A---ACCCGTCCCAACT-----C-----------------------GGGCATGAT-----------GGATGGTGGGAGCG----TATATTGGCC-TCCCGTGTA--------CTCGC-GTTATGGTAGGTATAAAA----TTGAGGCC-CGAGTG---ACGAACG--TCAC-CACAAGTGG----TGGTC------------TGTAATAG------------CTATTTCG-----…
576	>M01634_72_000000000-C3HGL_1_2106_6271_15487	M01634_72_000000000-C3HGL_1_2106_6271_15487	TGCAGAATCCCGTGAACCATCGAGTCTTTGAACGCA-AGTTGCG-------------CCCCAAGCC-TTCTGGCTGAGGGCACGTCTGCCTGGGTGTC---ACAAAT----CACCG--------T-----------CC---------------------CC---C------CATC--CTCT-----C-----------------------GAG---GAT----------------A-TGGGACG----GAAGCTGATC-TCCCGTGTG----T---TACCG-CACGCGGTAGGCCAAAAT----CCAAGCTA-AGGACG-TCAGAAGCG--TCTT-GACATGCGG----TGGTG------------------AT----------------TTTA-----…
553	>M01634_72_000000000-C3HGL_1_2106_7091_4703	M01634_72_000000000-C3HGL_1_2106_7091_4703	TGCAGAATCCCGTGAACCATCGAGTCTTTGAACGCA-AGTTGCG-------------CCCGAAACC-ATTAGGTTGAGGGCACGTCTGCCTGGGTGTC---ACACAT----CGTTG--------------------CC---------------------CC---A---------CCGCCAA-----ATGCT--TCGTGCT------ATGCG-G---CGT----------------G-TGGGGTG----AATGTTGGCC-TCCCGCGAG----C---TAAGG-CTCACGGTTGGTTTAAAT----TTGGGTCC-ATGGTA---GGGTATG--CCAT-GATGGATGG----TGGTTGAG-TAACGCTCGAGACCGA-----------------TCA-----…
250	>M01634_72_000000000-C3HGL_1_2106_8017_4025	M01634_72_000000000-C3HGL_1_2106_8017_4025	TGCCGAATCCCGTGAACCATCGAGTCTTTGAACGCA-AGTTGCA-------------CCCCAAGCC-TTCTAGCCGAGGGCACGTCTGCTTGGGTGTC---ACAAAT----CGTCG--------T-----------CC---------------------CC---C------CATC--CTCT-----C-----------------------GAG---GAT----------------A-TGGGACG----GAAGCTAATC-TCTCGTGTG----T---TACCA-CACGCGGTTGGCCAAAAT----CCTAGCTA-AGGGCG-TCCGGAGCG--TCTT-GACATGCGG----TGGTG------------------AA----------------TTCA-----…
438	>M01634_72_000000000-C3HGL_1_2106_8165_20947	M01634_72_000000000-C3HGL_1_2106_8165_20947	TGTAGAATCCCGTGAACCATCGAGTCTTTGAACGCA-AGTTGTG-------------CCCCAAGCC-TTCTGGCCGAGGGCACGTCTGCCTGGGTGTC---ACAAAT----CGTCG-------------------TCC---------------------CC---C------CATC--CTCT-----C-----------------------GAG---GAT----------------A-TGGGACG----GAAGCCGATC-TCCTGTGTG----T---TACCG-CATGCGGTTGGCCAAAAT----CCAAGCTA-AGGACG-TCAGAAGCG--TCTT-GACATGCGG----TGGTG------------------AA----------------TTTA-----…
417	>M01634_72_000000000-C3HGL_1_2106_9070_15685	M01634_72_000000000-C3HGL_1_2106_9070_15685	TGCAGAATCCCGCGAACCATCGAGTCTTTGAACGCA-AGTTGCG-------------CCCGAGGCC-ACTTGGCCGAGGGCACGCCTGCCTGGGCGTCACGTAAAAC-ACGC------------------------TT---------------------CC---A------CCCCAAAACT-----C-----------------------TGG----GG---------------CG-GGACGCG----GCATGTGGCT-CCCCGTCT---------CGCAA-GGGGCGGTGGGCCGAAGT----TCCGGCTG-CCGGCTTAACTTGCCG-GACAC-AGCGCGTGG----TAGGCGATCTCGC----------------------------TATA-----…
533	>M01634_72_000000000-C3HGL_1_2107_10291_23734	M01634_72_000000000-C3HGL_1_2107_10291_23734	TGCAGAATCCCGTGAACCATCGAGTCTTTGAACGCA-AGTTGCG-------------CCCCAAGCC-TTCTGGCCGAGGGCACGTCTGCCTGGGTGTC---ACAAAT----CGTCG-------------------TCC---------------------CC---C------CATC--CTCT-----C-----------------------GAG---GAT----------------A-TCGGACA----GAAGCTGATC-TCCCTTGTG----T---TACCG-TACGCTGTTGGCCAAAAT----CCGAGCTA-AGGACG-CCAGGAGTG--TCTT-GACATGCAG----TGGTG------------------AA----------------TTCA-----…
503	>M01634_72_000000000-C3HGL_1_2107_10897_19961	M01634_72_000000000-C3HGL_1_2107_10897_19961	TACAGAATTCCGTGAATCACCGGGTCTTTAAACGCA-AGTTTCG-------------CCCAAAGCC-TTTAGGCTGAGGGCACGTCTGCCTGGGCATC---ACGTAT--CTCGTCG-----CAC------------CC---------------------CC---A---ACCCATCCCAACT-----C-----------------------GGGCATGAT-----------GGCTGGTGGGAGTG----GATATTGTCC-TCCCGTGTA--------CTCGC-ATTACGGTTGGTCTAAAA----TTGATCCC-CAAACG---ACGAACA--TCAT-GACAAGTGG----TGGTC------------TATAATAG------------CTATTTCA-----…
577	>M01634_72_000000000-C3HGL_1_2107_11083_16543	M01634_72_000000000-C3HGL_1_2107_11083_16543	TGCAGAATCCCGTGAACCATCGAGTCTTTGAACGCA-AGTTGCG-------------CCCCAAGCC-TTCTGGCCGAGGGCACGTCTGCCTGGGTGTC---ACAAAT----CGTCG-------T------------CC---------------------CC---C------CATC--CTCT-----C-----------------------GAG---GAT----------------A-TCGGACG----GAAGCTGGTC-TCCCGTGTG----T---TACCG-CACGCGGTTGGCCAAAAT----CCTAGCTA-AGGATG-CCAGGAGCG--TCTT-GACATGCGG----TGGTG------------------AA----------------TTCA-----…
808	>M01634_72_000000000-C3HGL_1_2107_13450_19963	M01634_72_000000000-C3HGL_1_2107_13450_19963	TGCAGAATCCCGTGAACCATCGAGTCTTTGAACGCA-AGTTGCG-------------CCCCAAGCC-TTCTGGCCGAGGGCACGTCTGCCTGCGTGTC---ACAAAT----CGTCG-------------------TCC---------------------CC---C------CATC--CTCT-----C-----------------------GAG---GAT----------------A-TGGGACG----GAAGCTGATC-TCCCGTGTG----T---TACCG-CACGTGGTTGGCCAAAAT----CCGAGCTA-AGGACA-TCAGGAGCG--TCTT-CACATGCGG----TGGTG------------------AA----------------TTTA-----…
161	>M01634_72_000000000-C3HGL_1_2107_14579_25163	M01634_72_000000000-C3HGL_1_2107_14579_25163	TGCAGAATCCCGTTAACCATCGAGTCTTTGAACGCA-AGTTGCG-------------CCCCAAGCC-TTCTAGCCAAGGGCACGTCTGCCTGGGTGTC---ACAAAT----CGTTG--------T-----------CC---------------------CC---C------TATC--CTCT-----C-----------------------GAG---GAT----------------A-TGGGACG----GAAGCTGATC-TCCCGTGTG----T---TACTG-CACGCGGTTGGCCAA-AT----CTGAGCTA-AGGACG-CCAGGATCG--TCTT-GACATGCAG----TGGTG------------------AA----------------TTCA-----…
586	>M01634_72_000000000-C3HGL_1_2107_15174_20309	M01634_72_000000000-C3HGL_1_2107_15174_20309	TGCAGAATCCCGTGAACCATCGAGTCTTTGAACGCA-AGTTGCG-------------CCCCAAGCC-TTCTGGCCGAGGGCACGTCTGCCTGGGTGTC---ACAAAT----CGTCG--------------------T-----------------------C---C------CCCATCCTCT-----C-----------------------GAG---GAT----------------A-TGGGATG----GAAGCTGATC-TCCCGTGTG----T---TACCG-CACGCGGTTGGCCAAAAT----CCTAGCTA-AGGATG-CCAGGAGCG--TCTT-GACATGCGG----TGGTG------------------AA----------------TTCA-----…
336	>M01634_72_000000000-C3HGL_1_2107_17382_2928	M01634_72_000000000-C3HGL_1_2107_17382_2928	TGCAGAATCCCGTGAACCATCGAGTCTTTGAACGCA-AGTTGCG-------------CCCCAAGCC-TTATGGCCGAGGGCACGTCTGCCTGGGTGTC---ACAAAT----CGTCG-------------------TCC---------------------CC---C------CATC--CTCT-----C-----------------------GAG---GAT----------------A-TGGGACG----GAAGCTGATC-TCCCGTGTG----T---TACCG-CACGCGG-T--------T--------G-----G--C---CA--AGCG--TCTT-GACATGCGG----TGGTG------------------AA----------------TTTA-----…
523	>M01634_72_000000000-C3HGL_1_2107_21475_11167	M01634_72_000000000-C3HGL_1_2107_21475_11167	TGTAGAATCCCATAAATCACCGATTCTTTGAACGCA-AGTTGCG-------------CCCAAAGCC-TTTAGGCTGAGGGCACGTCTGCGTGGGCATC---ACGTAT--CCCGTCG-----CAC------------CC---------------------CG---A---ACTTGTCCCAACT-----T-----------------------GGTCATGAT-----------GGCTGGTGGGAGCG----GATATTGGCC-ACCCATGTA--------CTCGC-GTTACAGTTGGTCTAAAA----TCGAGTCC-CGAGTG---GTGAACG--TCAT-GATAAGTGG----TGGTC------------TGTAATAG------------CTATTTCG-----…
371	>M01634_72_000000000-C3HGL_1_2107_22424_16112	M01634_72_000000000-C3HGL_1_2107_22424_16112	GGGGGGGGGGGGGGGGGGGGGGGGGGGGGGGGGGGG-GGGGGCG-------------CCCGGAGCC-TTCTGGCTGAGGGCACGTCTGCCTGGGCGTC---ACGCAT--CGCGTCG-----CA-------------TC---------------------CC---A---ACTCGCCTCCTTC-----------------------------GGGAGCAGT-------------AGAGTGGGATCG----GATATTGGTC-CCCCGTGCG--------CACCAGCGCGCGGTCGGCCTAAAT----GCGAACCC-GCGGCG---ACTCGCG--TCGC-GACAAGTGG----TGGTT------------------GA------------ACTCTCAA-----…
601	>M01634_72_000000000-C3HGL_1_2107_25801_9486	M01634_72_000000000-C3HGL_1_2107_25801_9486	TGCAGAATCCCGTGAACCATCGAGTCTTTGAACGCA-AGTTGCG-------------CCCGATGCC-ATTAGGTTGAGGGCACGTCTGCCTGGGTGTC---ACAAAC----CGTCG-------T-C----------CC---------------------TC---T------CATC--CT-T-----C-----------------------TCG---GAT----------------A-TGGGACG----GAAACTGGTC-TCCCGTGTG----T---TACCG-CACGCGGTTGGCCAAAAT----CCGAGCTA-AGGGCG-CCTAGAGCG--TCAC-GACATGCGA----TGGTG------------------AA----------------CT-T-----…
256	>M01634_72_000000000-C3HGL_1_2107_28258_10835	M01634_72_000000000-C3HGL_1_2107_28258_10835	TGCAGAATCCCGTGAACCATCGAGTCTTTGAACGCA-AGTTGCG-------------CCCCAAGCC-TTCTGGCCGAGGGCACGTCTGCCTGGGTGTC---ACAAAT----CGTCG--------T-----------CC---------------------CC---C------CATC--CTCT-----C-----------------------GAG---GAT----------------A-TGGGACG----GAAGCTGATC-TCCCGTGTG----T---TACCG-CACGCGGTTGGCCAAAAT----CCGAGCTA-AGGATG-CCAAGAGCG--TCTT-GACATGCAG----TGGTG------------------AA----------------TTCA-----…
637	>M01634_72_000000000-C3HGL_1_2107_2844_18304	M01634_72_000000000-C3HGL_1_2107_2844_18304	TGCAGAATCCCGTGAACCATCGAGTCTTTGAACGCA-AGTTGCG-------------CCCGAAGCC-GTTAGGCCGAGGGCACGTCTGCCTGGGCGTC---ACAAGT----CGTTG--------------------CC---------------------CC---C-----CCGACCCCTTC-----------------------------GGG---GGT--------------CGGACGGGACG----GATGATGGCCTTCCCGTGTG--------CCCTGTCACGCGGTTGGCATAAAT---ACCGAGTCC-TCGGCG---AACGGCG--CCGC-GACGATCGG----TGGTTGTC---------------AA----------ACCTCGGTGCCTTG-…
219	>M01634_72_000000000-C3HGL_1_2107_5335_20333	M01634_72_000000000-C3HGL_1_2107_5335_20333	TGCAGCATCCCGTGAACCATCGAGTCTTTGAACACA-AGTTGCG-------------CCCGACGCC-TTCAGGCTGAGCGCATGCCTTCCTGGGCGTC---ACGCAT--CGCGTCT--------------------CC---------------------CC---C------ATACCAATTT-----------------------------------GGT----------------G-CGGGGCG----GATAATGGCA-TCCCGATAG----------------CTCTGTTTGCCCAAAA----ATGATCCC-TCACCG---ACGGATG--TCAC-AACCAGTGG----TGGTTGAA---------------AG----------------ATCA-----…
316	>M01634_72_000000000-C3HGL_1_2107_6030_14159	M01634_72_000000000-C3HGL_1_2107_6030_14159	TGCAGAATCCCGTGAACCATCGAGTCTTTGAACGCA-AGTTGCG-------------CCCCAAGCC-TTCTGGCCGAGGGCACGTCTGCCTGGGTGTC---ACAAAT----CGTCG--------T-----------CC---------------------CC---C------CATC--CTCT-----C-----------------------GAG---GAT----------------A-TCGGACG----GAAGCTGGTC-TCCCGTGTG----T---TACCG-CACGCGGTTGGCCAAAAT----CCTAGCTA-AGGGCG-CCTAGAGCG--TCAC-GACATGCGG----TGGTG------------------AA----------------TTTA-----…
595	>M01634_72_000000000-C3HGL_1_2107_6261_14692	M01634_72_000000000-C3HGL_1_2107_6261_14692	TGCAGAATCCCGTGAGCCATCGAGTCTTTGAACGCA-AGTTGCG-------------CCCCAAGCC-TTCTGGCCGAGGGCACGCCTGCCTGGGCGTC---ACACGT----CGTTGCC------------------CC---------------------CC---C------CCAAACCCCT-----C-----------------------GGG---AGT--------------TGGGCGGGACG----GATGATGGCC-TCCCGTGTG----------CTGTCATGCGGTTGGCATAAAA----ACAAGTCC-TCGGCG---ACTAACG--CCAC-GACAATCGG----TGGTTGTC---------------AA-------------ACCTCTG-----…
466	>M01634_72_000000000-C3HGL_1_2107_6371_8267	M01634_72_000000000-C3HGL_1_2107_6371_8267	TGCAGAATCCCGTGAATCACTGAGTCTTTGAATGCA-AGTTGTA-------------CCCAAAGCC-TTTAAGCTGAGGGCACGTCTGCTTGGGCGTA---ACGTAT--CCCGTTG-----CAG------------CC---------------------CC---A---AACCGTCCCAACT-----C-----------------------GGGCATGAT-----------GGCTGGTGGGAGTA----GATATTGGCC-TCCTATGTA--------CTCGT-ATTATGGTTGGTCTAAAA----TTGATCCC-CGAGCG---ACGAACG--TCAC-GACAAGTGG----TGGTC------------TGTAATAG------------CTATTTCG-----…
299	>M01634_72_000000000-C3HGL_1_2107_7343_26191	M01634_72_000000000-C3HGL_1_2107_7343_26191	T-GCAGAATCCCGTGAACCATTGAGTCTTTG-A---ACGCAA-GT-TGCGC--------------------CCG--------------------AA---G---CCACTAGGCTAAGGG---CACGT-------------------CTG---CCTGGGTGTCG---GT--TT-GGGGGCG----GAAATTAGCC-TCCTGTGC---------CATGT-TGTGCGGCTGGCGTAAAA----CTGAGTCT-ATGGTG---ACGAATG--TCAC-GACAT-CGG----TGGTTGTA-------------AGAA------------GACCTTCT--------------------TGT-----------------CTTG-------TCGTGT---GA--ATGTCC…
536	>M01634_72_000000000-C3HGL_1_2107_8644_18982	M01634_72_000000000-C3HGL_1_2107_8644_18982	TGCAGAATCCCGTGAACCATCGAGTCTTTGAACGCA-AGTTGCG-------------CCCCAAGCC-TTCTGGCCGAGGGCACGTCTGCCTGGGTGTC---ACAAAT----CGTCG-------------------TCC---------------------CC---C------CATC--CTCT-----C-----------------------GAG---GAT----------------A-TGGGACG----GAAGCTGATC-TCCCGTGTG----T---TACCG-CACGCGGTTGGCCAAAAT----CCGAGCTA-AGGACG-TCAGGAGCG--TCCT-GACATACGG----TGGTG------------------AA----------------TTCA-----…
728	>M01634_72_000000000-C3HGL_1_2107_9310_20973	M01634_72_000000000-C3HGL_1_2107_9310_20973	TGCAGAATCCCGTGAACCATCGAGTCTTTGAACGCA-AGTTGCG-------------CCCCAAGCC-TTCTGGCCGAGGGCACGTCTGCCTGGGTGTC---ACAAAT----CGTCG-------------------TCC---------------------CC---C------CATC--CTCT-----C-----------------------GAG---GAT----------------A-TGGGATG----GAAGCTGATC-TCCCGTGTG----T---TACCG-C-C-C-G-T-G-----AT------GA-C----G--C---CAGGAGGG--TCTT-GACATGCGG----TGGTG------------------AA----------------TTCA-----…
740	>M01634_72_000000000-C3HGL_1_2108_12162_7679	M01634_72_000000000-C3HGL_1_2108_12162_7679	TGCAGAATCCCGTGAACCATCGAGTCTTTGAACGCA-AGTTGCG-------------CCCCAAGCC-TTCTGGCCGAGGGCACGTCTGCCTGGGTGTC---ACAAAT----CGTCA-------C------------CC---------------------CC---C------CATC--CTCT-----C-----------------------GAG---GAT----------------A-TGGGACG----GAAGCTGATC-TCCCGTGTG----T---TACCG-CACGCGGTTGGCCAAAAT----CCGAGCTA-AGGACG-TCAGTAGCG--TCTT-GACATGCGG----TGGTG------------------AA----------------TTCA-----…
559	>M01634_72_000000000-C3HGL_1_2108_12405_28156	M01634_72_000000000-C3HGL_1_2108_12405_28156	TGCAGAATCCCGTGAACCATCGAGTCTTTGAACGCA-AGTTGCG-------------CCCGAAGCC-ATTAGGCCGAGGGCACGTCTGCCTGGGCGTC---ACACGT----CGTTG------------------CCCC---------------------CC---C------CAACCCCCTC-----------------------------GGG---AGT--------------TGGATGGGACG----GATGATGGCC-TCCCGTGTG--------CTCAGTCACGCGGTTGGCATAAAT---ACCAAGTCC-TCGGCG---ACCAACG--CCAC-GACAATCGG----TGGTTGTC---------------AA-------------ACCTCTG-----…
34	>M01634_72_000000000-C3HGL_1_2108_15469_7413	M01634_72_000000000-C3HGL_1_2108_15469_7413	TGCAGAATCCCGTGAACCATCGAGTCTTTGAACGCA-AGTTGGG-------------CCCGAAGTC-ATTAGGCCGATGGCACGTCTGCCTGGGCGTC---ACACGT----CGTTG---------C----------CC---------------------CC---T------GGAC-CCCTT-----C-----------------------TGG---AGT-----CG--------GG-TAGGATG----GATGGTCATC-TCCCGTGCG--------CCAGT-CGCGCGGTTGGTCTAAAT---ATCGAGTCC-CCGGCG---ACCGGCG--CCGC-GACAATCGG----TGGTTG---------------TGAG------------A-CCTCGG-----…
599	>M01634_72_000000000-C3HGL_1_2108_17528_22693	M01634_72_000000000-C3HGL_1_2108_17528_22693	TGCAGAATCCTCTGAACCATCGAGTCTTTTAACGCA-AGTTGCG-------------CCCCAACCC-TTCTGGCCGAGGGCACGTCTGCCTGGGTGTC---ATAAAC----CGTCG-------T-C----------CC---------------------TC---T------CATC--CT-T-----C-----------------------TCG---GAT----------------A-TGGGACG----AAAGCTGGTC-TCCCGTGTG----T---TACCG-CACGCGGTTGGCCAAAAT----CCGAGCTA-AGGGCG-CCTAGAGTG--TCAC-GACATGCGG----TGGTG------------------AA----------------CTAA-----…
35	>M01634_72_000000000-C3HGL_1_2108_17721_3539	M01634_72_000000000-C3HGL_1_2108_17721_3539	TGCAGAATCCCGTGAACCATCGAGTTTTTGAACGCA-AGTTGCG-------------CCCGAAGCC-ATTAGGCCAAGGGCACGTCTGCCTGGGCGTC---ACACAA--AGCGTCG--------------------CC---------------------CC---C-----CCAACTACCCT---------------------------ATGGGTGTTGT----------------G-CGGGGCG----GATATTGGCT-CCCCGTGCT--------CTTTTGTGCGCGGTCAGCCTAAAA----GCCAGTCC--CGATG---ACAAACG--TCGT-GGCAATTGG----TGGTTGTCA--------------AA------------CCGTTTCA-----…
597	>M01634_72_000000000-C3HGL_1_2108_19038_12679	M01634_72_000000000-C3HGL_1_2108_19038_12679	TGCAGAATCCCGTGAACCATCGAGTCTTTGAACGCA-AGTTGCG-------------CCCGAAGCC-ATTAGGCCGAGGGCACGCCTGCCTGGGCGTC---ACACGT----CGTTGC-------------------CC---------------------CC---C-----CCAAACCCCTC-----------------------------GGG---AGT--------------TGGGCGGGACG----GATGATGGCC-TCCCGTGTG--------CTCTGTCATGCGGTTGGCAT-AAA---AACAAGTCC-TCGGCG---ACTAACG--CCAC-GACAATCGG----TGGTTGTC---------------AA-------------ACCTCTG-----…
425	>M01634_72_000000000-C3HGL_1_2108_19285_9624	M01634_72_000000000-C3HGL_1_2108_19285_9624	TGCAGAATCTTGTGAACCATCGAGTCTTTGAACGCA-AGTTGCG-------------CTCGAAGCC-ATTAGGCTGAGGGCACACCTGCCTGGGTGTT---GCACAT----CGTTG--------------------CC---------------------CC---C---GTGCCTTGGCCAT-----GTGCC-------------------AGG---CAC-----------CA--AG-CGGGACG----AATGTTGGCT-TCCCGTGAG----C---AATGT-CTCATGGTTGGTTGAAAA----CTGAGTCC-GCGGTG---GAGGGCG--CCAT-GATGGATGG----TGGCTGAGTTAAAGCTCGAGACCGA-----------------TCG-----…
804	>M01634_72_000000000-C3HGL_1_2108_19481_19761	M01634_72_000000000-C3HGL_1_2108_19481_19761	TGCAGAATCCCGTGAACCATCGAGTCTTTGAACGCA-AGTTGCG-------------CCCCAAGCC-TTCTGGCCGAGGGCACGTCTGCCTGGGTGTC---ACAAAT------T-G-------T------------CC---------------------CC---C------CATC--CTCT-----C-----------------------GAG---GAT----------------A-TGAGACG----GAAGCTGATC-TCCCGTGTG----T---TACCG-CACGCGGTTGGCCAAAAT----CCTAGCTA-AGGATG-CCAGGAGCG--TCTT-GACATGCGG----TGGTG------------------AA----------------TTCA-----…
201	>M01634_72_000000000-C3HGL_1_2108_20189_10780	M01634_72_000000000-C3HGL_1_2108_20189_10780	TGAAGAATCCCGTGAACCATCGAGTCATTGAATGCA-AGTTGCA-------------CTCGAGCCC-TCCTGGTCGAGGGCTCATCTGCCTGGGTGTC---ACAAAT----CGTCG--------------------CC---------------------CC---C------ACTCCCCTCGACTCAC-----------------------GAG---GGC------------------GGGGGCG----GATATTGGTC-TCCCGCGCG--------CTCCTGCGTGTGGTTGGCCTAAAA----TCGAGTCC-TCGACA---ACGGTCG--CCAC-GACAAGTGG----TGATTGA----------------GA------------GACCCTCG-----…
289	>M01634_72_000000000-C3HGL_1_2108_24990_20784	M01634_72_000000000-C3HGL_1_2108_24990_20784	TGCAGAATCCCGTGAACCATCGAGTCTTTGAACGCA-AGTTGCG-------------CCCGAAGCC-ATTAGGCCGAGGGCACGCCTGCCTGGGTGTT---GCACAT----CGTTG--------------------CC---------------------CC---C---GTGCCTTGGCCAC-----GTGCC-------------------AGG---CAC-----------CA--AG-CGGGGTG----AATATTGGCT-TCCCGCGAG----C---AATGT-CTCATGGTTGGTTGAAAA----CTAAGTCC-GTGGTG---GAGGGTG--CGGT-GATGGATGG----TGGCTGGGTTAAAGCTCGAGAACGA-----------------TCG-----…
558	>M01634_72_000000000-C3HGL_1_2108_2566_15029	M01634_72_000000000-C3HGL_1_2108_2566_15029	TGCAGAATCCCGTGAACCATTGAGTCTTTGAACGCA-AGTTGCG-------------CCCCAAGCC-TTCTGGCCGAGGGCACGTCTGCCTGGGTGTC---ACAAAT----CGTCG--------------------T----------------------CC---C------CCCATCCTCT-----C-----------------------GAG---GAT----------------A-TGGGACG----GAAGCTGGTC-TCCCGTGTG----T---TACCG-CACGCGGTTGGCCAAAAT----CCGAGCTA-AGGATG-CCAGGAGCG--TCTT-GACATGCGG----TGGTG------------------AA----------------TTCA-----…
358	>M01634_72_000000000-C3HGL_1_2108_26218_19335	M01634_72_000000000-C3HGL_1_2108_26218_19335	TGCAGAATCCCGTGAACCATCGAGTCTTTGAACGCA-AGTTGCG-------------CCCGAAGCC-ATTAGGCCGAGGGTACGTCTGCCTGGGCGTC---ACACGT----CGTTG--------------------CC---------------------CC---C-----CCCAAACAAT------------------------------GCG---TGT--------------CGATC-CGTC-----GATGCTTTCA-ACGCG-ACC-------CCAGGTCAGGCGGGGTTACCCGCTG---AATTTAAGC-ATATCA---ATAAGCGG-AGGA-GGCTGACTG---ACTTATAGC---------------GA-------------ATCTC-G-----…
730	>M01634_72_000000000-C3HGL_1_2108_4089_20272	M01634_72_000000000-C3HGL_1_2108_4089_20272	TGCATAATCCCGTGAACCATCGAGTCTTTGAACGCA-AGTTGCG-------------CCCCAAGCC-TTCTGGCCGAGGGCACGTCTGCCTGGGTGTC---ACAAAT----CGTCG-------T------------CC---------------------CC---C------CATC--CTCT-----C-----------------------GAG---GAT----------------A-TGGGACG----GAAGCTGATC-TCCCGTGTG----T---TACCG-CACGCGGTTGGCCAAAAT----CCGAGCTA-AGGACG-TCAGAAGCG--TCTT-GACATGCGG----TGGTG------------------AA----------------TTCA-----…
380	>M01634_72_000000000-C3HGL_1_2108_5442_21053	M01634_72_000000000-C3HGL_1_2108_5442_21053	TGCAGAATCCCGTGAACCATCGAGTCTTTGAACGCA-AGTTGCG-------------CCCGATGCC-ATTAGGTTGAGGGCACGTCTGCCTGGGTGTC---ACATAT----CGAAG--------------------CC---------------------TC---C---TGCCAATTTCCCT---------------------------TTGATTATTGT----------------G-CAGGGTG----GATGTTGGCC-TCCCGTGAG----CACCATCGC-CTCATGGTTGGTTGAAAA----TCGAGACC-TTGGTA---GAGTGTG--CCAT-GATAAATGG----TGGTTGTGT--------------GA----------------TCCA-----…
635	>M01634_72_000000000-C3HGL_1_2108_6621_24771	M01634_72_000000000-C3HGL_1_2108_6621_24771	TGCAGAATCCCGTGAACCATCGAGTCATTGAACGCA-AGTTGCG-------------CCCCAAGCC-TTCTGGCCGAGGGCATGTCTGCCTGGGTGTC---ACAAAT----CATCG--------T-----------CC---------------------CC---C------CATC--CTCT-----C-----------------------GAG---GAT----------------A-TGGGGCG----GAAGCTGATC-TCCCGTGTG----T---TACCG-CACGCGGTTGGCCAAAAT----CTGAGCTA-AGGACG-CGAGGAGGG--TCTT-CACATGCGG----TGGTG------------------AA----------------TTCA-----…
254	>M01634_72_000000000-C3HGL_1_2108_8760_6165	M01634_72_000000000-C3HGL_1_2108_8760_6165	TGCAGAATCCCGTGAACCATCGAGTCTTTGAACGCA-AGTTGCG-------------CCCCAAGCC-TTCTGGCCGAGGGCACGTCTGCCTGGGTGTC---ACAAAT----CGTCG--------T-----------CC---------------------CC---C------CATC--CTCT-----C-----------------------GAG---GAT----------------A-TGGGACG----GAAGCTGATC-TCCCGTGTG----T---TACCG-CACGCGGTTGGCCAAAAT----CCGAGCTA-AGGACG-CAAGGAGTG--TCTT-GACATGCGG----GTGTG------------------AA----------------TTCA-----…
544	>M01634_72_000000000-C3HGL_1_2108_9138_9128	M01634_72_000000000-C3HGL_1_2108_9138_9128	TGTAGAATCCCGTGAACCATTGAGTCATTGAACGCA-AGTTGCG-------------CCCCAAGCC-TTCTGGCCGAAGGCACGTCTGCCTAGGTGTC---ACAAAT----CGTCG-------T------------CC---------------------CC---C------CATC--CTCT-----C-----------------------GAG---GAT----------------A-TGGGACG----GAAGCTGATC-TCCCGTGTG----T---TACCG-CACGCGGTTGGCCAAAAT----CCGAGCTA-AGGACG-TCAGGAGCG--TCTT-GACATGCGG----TGGTG------------------AA----------------TTCA-----…
575	>M01634_72_000000000-C3HGL_1_2109_11371_3313	M01634_72_000000000-C3HGL_1_2109_11371_3313	TGCAGAATCCCGTGAACCATCGAGTTCTTGAACGCA-AGTTGCG-------------CCCGAGACC-TTTAGGTTGAGGGCACGTCTGCCTGGGCGTC---ACAAAT----CGTCG--------T-----------CC---------------------CC---C------CATC--CTCT-----C-----------------------GAG---GAT----------------A-TGGGACG----GAAGCTGATC-TCCCGTGTG----T---TACCG-CACGCGGTTGGCCAAAAT----CCGAGCTA-AGAACG-TCAGGAGCG--TCTT-GACATGCGG----TGGTG------------------AA----------------TTTA-----…
276	>M01634_72_000000000-C3HGL_1_2109_11912_12208	M01634_72_000000000-C3HGL_1_2109_11912_12208	TGCAGAATCACGTGAACCATCGAGTCTTTGAACGCA-AGTTGCG-------------CCCCAAGCC-TTCCGGCCGAGGGCACGTCTGCCTGGGTGTC---ACAAAT----CGTCG-------------------TCC---------------------CC---C------CATC--CTCT-----C-----------------------GAG---GAT----------------A-TGGGACG----GAAGCTGATC-TCTCGTTTG----T---TACCG-CATGCGGTTGGCCAAAAT----CCGAGCTA-AGGATG-TCAGAAGCG--TCTT-GACATGCGG----TGGTG------------------AA----------------TTTA-----…
365	>M01634_72_000000000-C3HGL_1_2109_12479_21525	M01634_72_000000000-C3HGL_1_2109_12479_21525	TGCAGAATCCCGTCAACCATCGAGTCTTTGAACGCA-AGTTTCG-------------CCCCAAGCC-TTCTGGCCGAGGGCACGTCTACCTGGGTGTC---ACAAAT----CGTTG--------T-----------CC---------------------CC---C------TATC--CTCT-----C-----------------------GAG---GAT----------------A-TGGGACG----GAAGCTGATC-TCCCGTGTG----T---TACCG-CACGTGGTTGGCCAAAAT----GCGAGCTA-AGGACG-CCAGGAGCA--TCTT-GACATGCGG----TGGTG------------------AA----------------TTCA-----…
644	>M01634_72_000000000-C3HGL_1_2109_12630_21939	M01634_72_000000000-C3HGL_1_2109_12630_21939	TGCAGAATCCCGTGAACCATCGAGTCTTTGAATGCA-AGTTGCG-------------CCCCAAGCC-TTCTGGCCGAGGGCACGTCTGCCTGGGTGTC---ACAAAT----CGTCG-------------------TCC---------------------CC---C------CATC--CTCT-----C-----------------------GAG---GAT----------------A-TGGGACG----GAAGCTGATC-TCCCGTGTG----T---AACCG-CACATGGTTGGCCAAAAT----CCGAGCTA-AGGATA-TCAGTAGCG--TCTT-GACATGCGG----TGGTG------------------AA----------------TTTA-----…
231	>M01634_72_000000000-C3HGL_1_2109_14870_9422	M01634_72_000000000-C3HGL_1_2109_14870_9422	TGTAGAATCCCGTGAACCATTGAGTCTTTGAACGCA-AGTTGCG-------------CCTCAAGCC-TTCTGGCCGAGGGCACGTCTGCCTGAGTATC---ACAAAT----CATCG-------------------TAC---------------------CC---C------CATC--CTCT-----T-----------------------GAG---GAT----------------A-TGGGACG----GAAGCTGATC-TCCCGTGTG----T---TACCG-CATGCGGTTGGCCAAAAT----CCGAGCTA-AGGACG-TCAGGAGCG--TCTT-GACATGCGG----TGGTG------------------AA----------------TTTA-----…
376	>M01634_72_000000000-C3HGL_1_2109_15944_16576	M01634_72_000000000-C3HGL_1_2109_15944_16576	TGCAGAATCTCGTGAACCATTATGTCTTTGAACAAA-AGTTGCG-------------TCCGAGGAC-TCCTGGTCGAGGGCATGTCTGCCTGTGTGTC---ACGCAT----CGTCG--------------------CC---------------------CC---C---A-------CTCCC-----C-----------------------TAG---GCTCATGAG--------GGC-GGGGGCG----GATACTGATC-TCCCGCGCA----C---TCCCG-CTCGTGGTTGGCCTAAAA----TTGAGTCA-TCGGT-------------------------GG----TGGTTG-------A---------GA------------GACCCTC------…
422	>M01634_72_000000000-C3HGL_1_2109_16108_21531	M01634_72_000000000-C3HGL_1_2109_16108_21531	TGCAGAATCCCGTGAACCATCGAGTCTTTGAACGCA-AGTTGCG-------------CCCGAAGCC-ATTAGGCCGAGGGCACGCCTGCCTGGGTGTT---GCACAT----CGTTG--------------------CC---------------------CC---C---GTGCCTTGGCCAC-----GTGCC-------------------AGG---CAC-----------CA--AG-CGGGGCG----AA---T-G-T-T-------G-----------G------C------TT---------C-----CC-GCGGTG---GAGGGCG--CCGT-GATGGATGG----TGGCAGAGTTAAAGCTCGAGACCGA-----------------TCG-----…
349	>M01634_72_000000000-C3HGL_1_2109_16249_15934	M01634_72_000000000-C3HGL_1_2109_16249_15934	TGCAGAATACCGTGAACCATCGAGTCTTTGAACGCA-AGTTGCG-------------CCCCAAGCC-TTCTGGCCGAGGGCACGTCTGCCTGGGTGTC---ACAAAT----CGTCG-------------------TCC---------------------CC---C------CATC--CTCT-----C-----------------------GAG---GAT----------------G-TGGGACG----GAAGCTGATC-TCCCGTGTG----T---TACCG-CACGCGGTTGGCCAAAAT----CCAAGCTA-AGGACG-TCAGTAGCG--TCTT-GACATACGG----TGGTG------------------AA----------------TTTA-----…
686	>M01634_72_000000000-C3HGL_1_2109_16544_16949	M01634_72_000000000-C3HGL_1_2109_16544_16949	TGCAGAATCCCGTGAACCATCGAGTCTTTGAACGCA-AGTTGCG-------------CCCCAAGCC-TTCTGGCTGAGGGCACGTCTGCCTGGGTGTC---ACAAAT----TGTCG-------------------CCC---------------------CC---C------CATC--CTCT-----C-----------------------GAG---GAT----------------A-TGGGACG----GAAGCTGATC-TCCCGTGTG----T---TACCG-CACGCGGTTGGCCAAAAT----CCGAGCTA-AGGACG-TCAGGAGCG--TCTT-GACATGCGG----TGGTC------------------AA----------------TTTA-----…
545	>M01634_72_000000000-C3HGL_1_2109_18862_8400	M01634_72_000000000-C3HGL_1_2109_18862_8400	TCCAGAATCCCGTGAACCATCGAGTGTTTGAACACA-AGTTGCG-------------CCCCAAGCC-TTCTGGCCGAGGGCACGTCTGCCTGGGTGTC---ACAAAT----CGTCG--------T-----------CC---------------------CC---C------CATC--CTCT-----C-----------------------GAG---GAT----------------A-TGGGACG----GAAGCTGATC-TCCCGTGTG----T---TACCG-CACGCGGTTGGCCAAAAT----CCAAGCTA-AGGACG-TCAGAAGCG--TCTT-GACATGCGG----TGGTG------------------AA----------------TTTA-----…
715	>M01634_72_000000000-C3HGL_1_2109_19210_25706	M01634_72_000000000-C3HGL_1_2109_19210_25706	GGGGGGGGGGGGGGGGGGGGGGGGGCGGGGGGCGCA-AGTTGCG-------------CCCCAAGCC-TTCTGGCCGAGGGCACGTCTGCCTGGGTGTC---ACAAAT----CGTCG--------------------TT---------------------CC---C------CCTCATCCTT-----C-----------------------AAG---GAT----------------T-CGGGACG----GAAGCTGATC-TCCCGTGTG----T---TACCG-CACGCGGTTGATCGAAAT----CCGAGCCA-AGGATG-CCTTGAGCG--TCCC-GACATGCGG----TGGTG------------------AA------------CTCGTTCA-----…
446	>M01634_72_000000000-C3HGL_1_2109_20794_25698	M01634_72_000000000-C3HGL_1_2109_20794_25698	TGCAGAATCCCGTAAACCATCGAGTCTTTGAATGCA-AGTTGCG-------------CCCGAGGCC-TCCTAGTCGAGGGCACGTTTGCCTGGGTATC---ACGCAT----CGTCG--------------------CC---------------------CC---C------GCTCCCCTCAGCTCAC-----------------------GAG---GGC------------------GAGGGCG----GATGCTGGTC-TCCCGCGCG----C---TCCCG-CCCGTGGTTGGCATAAAA----TGGAGTCC-CCGGTG---ACGGTCG--CCAT-GACAAGCGG----TGGTTGA----------------GA------------GACCCTCG-----…
149	>M01634_72_000000000-C3HGL_1_2109_23674_14818	M01634_72_000000000-C3HGL_1_2109_23674_14818	TGCAGAATCCCGTGAACCATCGAGTCTTTGAACGCA-AGTTGCG-------------CCCCAAGCG-TTTTAGCCGAGTGCACGTCTGCCTGGGTGTC---ACAAAT----CGTCG--------T-----------CC---------------------CC---C------TATC--CTCT-----C-----------------------GAG---GAT----------------A-TGGGACG----GAAGCTGATC-TCCAGTGTA----T---TACCG-CACGCGGTTGGCCAAAAT----CCAAGCTA-AGGACG-CAAGGAGTG--TCTT-GACATGCGG----GTGTG------------------AA----------------TTCA-----…
738	>M01634_72_000000000-C3HGL_1_2109_24282_17941	M01634_72_000000000-C3HGL_1_2109_24282_17941	TGCAGAATCCCGTGAACCATCGAGTCTTTGAACGCA-AGTTGCG-------------CCCCAAGCC-TTCTGGCTGAGGGCACGTGTGCCTGGGTGTC---ACAAAT----CGTCG----------------------------------------------------------------------------------------------------------------------------------------------------TGTG----T---TACCG-CATGCGGTTGGCCAAAAT----CCGAGCTA-AGGACG-CCAGGAGCA--TTCT-TACATGCGG----TGGTG------------------AA----------------TTCA-----…
720	>M01634_72_000000000-C3HGL_1_2109_24817_6406	M01634_72_000000000-C3HGL_1_2109_24817_6406	TGTAGAATCCCGTGAACCATCGAGTCTTTGAACGCA-AGTTGCG-------------CCCGAAGCC-TTCTGGCCGAGGGCACGCCTGCCTGGGCGTC---ACGCAT--CGCGTCG--------------------CC---------------------CC---C---CTCCAACGTCCCC-----------------------------AGG---GAC--------TCGCGAGAGGGAGCGGAATTCCTAAAATGGTCTCCCGTGTG--CCT---TCTGG-CCCGCGGCTGGCCTAAAT----GAGATCCT-GCATCG---ACGGATG--TCAC-GACCAGTGG----TGGTTGAA---------------AA----------------CTCA-----…
56	>M01634_72_000000000-C3HGL_1_2109_25761_9783	M01634_72_000000000-C3HGL_1_2109_25761_9783	TGCAGAATCCCGTGAACCATCGAGTCTTTGAACGCA-AGTTGCG-------------CCCGATGCC-ATTAGGTTGAGGGCACGTCTGCCTGGGTGTC---ACATAT----CGAAG--------------------CC---------------------CT----------TCCCCAAATT-----------------------------AAACTTGGT---------------GTGCAGGGTG----AATGATGGCT-TCCCGTGAG-----CCATTTGGTCTCATGGTTGGCTGAAAA----TTGAGACC-TTGGCA---GGGTGTG--CCAT-GATTAATGG----TGGTTGTGTGACG-------------------------------------…
237	>M01634_72_000000000-C3HGL_1_2109_26865_18525	M01634_72_000000000-C3HGL_1_2109_26865_18525	TGCAGAATCCCGTGAACCATCGAGTCTTTGAACGCA-AGTTGCG-------------GCCCAAGCT-TTCTAGCCGAGGGCACGTCTGCCTGGGTGTC---ACAAAT----ATTCA-------------------TCC---------------------CC---C------CATC--ATCT-----C-----------------------GAT---GAT----------------A-GGGGACG----GAAGCTGATC-TCCCGTGTG----T---TACCG-CACGCGGTTGGCCAAAAT----CCGAGCTA-AGGACG-TCAGGAGCG--TCTT-GACATGCGG----TGGTG------------------AA----------------TTTA-----…
583	>M01634_72_000000000-C3HGL_1_2109_3277_15969	M01634_72_000000000-C3HGL_1_2109_3277_15969	TGC-AGAATCCCGTGACCCATCGAGTCTTTG-AAC---GCAAGT----TGCGC--------------------CC---------------------AA---A---GCCATTAGGCTGA-----GGGCA-------------------CGC---CTG-----------CC--TG-GGTGTTG----CA-CATCGTT-GCCCTCGTG----C---CTTGG-C-CACGTGCCAGGCACCA----AGCGGGGC-GAAGT----TATAGC---TCGA-GATGGATGG----TGGCTGAGTTATAGCTCGAGACCGA-----------------TCG------------TGTGTGTCACC-----------------CCCA-------CTAGCT---TT--GCG-…
313	>M01634_72_000000000-C3HGL_1_2109_3356_17659	M01634_72_000000000-C3HGL_1_2109_3356_17659	TGCAGAATCCCGTGAACCATCGAGTCTATGAACGCA-AGTTGCG-------------CCCCAAGCC-TTCTGGCCGAGGGCACGTCTGCCTGGGTGTC---ACAAAT----CGTCG--------T-----------CC---------------------CC---C------CATC--CTCT-----C-----------------------GAA---GAT----------------A-TGGGACG----AAAGCTGATC-TCTTGTGTG----T---TACCG-CACGCGGTTGGCCAAAAA----CCGAGCTA-AGGACG-TCAGAAGTG--TCTT-GACATGCGG----TGGTG------------------AA----------------TTTA-----…
631	>M01634_72_000000000-C3HGL_1_2109_4710_13205	M01634_72_000000000-C3HGL_1_2109_4710_13205	TGCAGAATCCCGTGAACCATCGAGTCTTTGAACGCA-AGTTACG-------------CCCCAAGCC-TTCTGGCCGAGGGCACGTCTGCCTGGGTGTC---ACAAAT----CGTCG--------T-----------CC---------------------CC---C------TATC--CTCT-----C-----------------------GAG---GAT----------------A-TGGGACA----GAAGCTGATC-TCCCGTGTG----T---TACTG-CACGCGGTTGGCCAAAAT----CCAAGCTA-AGGACG-TCAGAAGCG--TCGT-GACATGCGG----TGGTG------------------AA----------------TTTA-----…
707	>M01634_72_000000000-C3HGL_1_2109_7816_11706	M01634_72_000000000-C3HGL_1_2109_7816_11706	TGCAGAATCCCGTGAACCATCGAGTCTTTGAACGCA-AGTTGCG-------------CCCGAAGCC-ATTAGGCCAAAGGCACGTCTGCCTGGGCGTC---ACGCAT-CT-CGTCA--------------------CC---------------------GC---A---T--CCCTAATTTT-----T-----------------------GTG---TAT--------------------CGGTG----GAATGTGACC-TCCTGC-------T---CCTAGTTGTGCAGTTGGTTAAAAC----TTGAGTATGTGGATT---AGGACT---TCAC-GACAAGTGG----TGGTTGGATA-------------AC------------AACTCTCG-----…
337	>M01634_72_000000000-C3HGL_1_2109_7915_25737	M01634_72_000000000-C3HGL_1_2109_7915_25737	TGCAGAATCCCGTGAACCATCGAGTCTTTGAACGCA-AGTTGCG-------------CCCCAAGCC-TTCTGGCCGAGGGCACGTCTGCCTGGGTGTC---ACAAAT----CGTCG--------T-----------CC---------------------CC---C------CATC--CTCT-----C-----------------------GAG---GAT----------------A-TGGGACG----GAAGCTGATC-TCCCGTGTG----T---TACCG-CACGCGGTTGGCCAAAAT----CCGAGCTA-AGGATT-CCAGGAGCA--TCTT-GACATGCGG----TGGTG------------------AA----------------TTCA-----…
790	>M01634_72_000000000-C3HGL_1_2110_11074_3978	M01634_72_000000000-C3HGL_1_2110_11074_3978	TGCAGAATCCCGTGAACCATCGAGTCTTTGAACGCA-AGTTGCG-------------CCCCAAGCC-TTCTGGCCGAGGGCACGTCTGCCTGGGTGTC---ACAAAT----CGTCG-------T------------CC---------------------CC---C------CATC--CTCT-----C-----------------------GAG---GAT----------------A-TGGGATG----GAAGCTGATC-TCCCGTGTG----T---TACCG-CACGCGGTTGGCCAAAAT----CCGTGCTA-AGGACG-CAAGGAGCG--TCTT-AACATGCGG----TGGTT------------------AA----------------TTTA-----…
402	>M01634_72_000000000-C3HGL_1_2110_11113_22860	M01634_72_000000000-C3HGL_1_2110_11113_22860	TGCAGAATCCCGTGAACCATCGAGTCTTTGAACGCA-AGTTGCA-------------CCCCAAGCC-TTCTGGCCGAGGGCACGTCTGCCTGGGTGTC---ACAAAT----CGTCG-------------------TCC---------------------CC---C------CATC--CTCT-----C-----------------------GAG---GAT----------------A-TGGGACG----GAAGCTGATA-TCCCGTGTG----T---TACCG-CACGCGGTTGGCCAAAAT----CCGAGCTA-AGGACG-TCAGAAGCG--TCTT-GACA---------TGATG------------------AA----------------TTTA-----…
224	>M01634_72_000000000-C3HGL_1_2110_11809_2271	M01634_72_000000000-C3HGL_1_2110_11809_2271	TGCAGAATCCCGTGAACCATCGAGTCTTTGTACGCA-AGTTGCG-------------CCCCAAGCC-TTCTGGCCGAGGGCACGTCTGCCTGGGTGTC---ACAAAT----CGTCG-------------------TCC---------------------CC---C------CATC--CTCT-----C-----------------------GAG---GAT----------------A-TGGGACG----GAAGCTGATC-TCCCGTGTG----T---TACCG-CACGCGGATGGCCAAAAT----CCGAGCTT-AGGACG-TCAGGAGCG--TCTT-GACATGCGG----TGGTG------------------AA----------------TTTA-----…
722	>M01634_72_000000000-C3HGL_1_2110_12252_3855	M01634_72_000000000-C3HGL_1_2110_12252_3855	TGCAGAATCCCGTGAACCATCGAGTCTTTGAACGCA-AGTTGCG-------------CCCGAAGCC-TTCTGGCAGAGGGCACGCATGCCTGGGCGTC---ACGCAT--CGTGTCG--------------------CC---------------------CC---C---CTCTAACGTCCCT-----------------------------AGG---GAC----------TCGTGAGCGGGAGCG----TAAAATGGTC-TCCCATGTG--CCT---TATGG-CCCGCGGCTAGCCTAAAT----GAGATCCT-GGATCG---ACGGATG--TCAT-GACCAGTGG----TGGTTGAA---------------AA----------------CTCA-----…
517	>M01634_72_000000000-C3HGL_1_2110_12317_9413	M01634_72_000000000-C3HGL_1_2110_12317_9413	TGCAGAATCCCGTGAATCACCGAGTCTTTGAACGCA-AGTTGCG-------------CCCAAAGCC-TTTAGGTTGAGGGCACGTCTGCCTGGGCGTC---ACGTAT--CCCGTCG-----CAC------------CC---------------------CC---A---ACCCGTCCCAACT-----C-----------------------GGGCATGAT-----------GGCTGGTGGGAGCG----GATATTGGCC-TCCCGTGTA--------CTCGC-GTTACGGTTGGTCTAAAA----TTGAGCCC-CGAGCG---ACGAACG--TCAC-GACAAGTGG----TGGTC------------TGTAATAG------------TTATTTCG-----…
492	>M01634_72_000000000-C3HGL_1_2110_13023_24785	M01634_72_000000000-C3HGL_1_2110_13023_24785	TGTAGAATCTCGTGAATCACCGAGTCTTTGAACGCA-AGTTGCG-------------CCCAAAGCC-TTTAGGCTGAGGGCACGTCTGCCTGGGTGTC---ACGTAT--CCCGTCG-----CAC------------CC---------------------CC---A---ACCCGTCCCAACT-----C-----------------------GGGCATGAT-----------GGATGGTGGGAGCG----GATATTGGCC-TCCCGTGTA--------CTCGC-ATTATGGTTGGTCTAAAA----TCGAACCC-CGAGCG---ACGAACA--TCAC-GATAAGTGG----TGGTC------------TGTAATAG------------CTATTTTG-----…
403	>M01634_72_000000000-C3HGL_1_2110_13854_2796	M01634_72_000000000-C3HGL_1_2110_13854_2796	TG-------------CAGAATCCC-GTGAACAATCGAGTCTTTGAACGCAAGTTGC---ACCCCA----AGCCT-------T------------CT---------------------GG---C------CGAG--GGCA-----C-----------------------GTG---TGC----------------C-T-GGGTG----TCA-CAAATC--GTCGTGTG----T---TACCG-CACGCGGTTGGCCAAAAT----CCGAGCTA-AGGACG-CCAGGAGCG--TTCT-TACATACTG----TGGTG------------------AA----------------TTCA--------------------ATT-----------------CTCG---…
760	>M01634_72_000000000-C3HGL_1_2110_15194_5657	M01634_72_000000000-C3HGL_1_2110_15194_5657	TGCAGAATCCCGTGAACCATCGAGTCTTTGAACGCA-AGTTATG-------------CCCCAAGCC-TTCTGGCTGAGGGCACATCTGCCTGGGTGTC---ACAAAT----CGTCA-------T------------CC---------------------CC---C------CATC--GTCA-----C-----------------------GAG---GAT----------------A-TGGGACG----GAAGCTGATC-TCCCGTGTG----T---TACCG-CACGCGGTTGGCCAAAAT----CCAAGCTA-AGGACG-CCAGGAGCG--TCTT-GACATGAGG----TGGTG------------------AA----------------TTCA-----…
92	>M01634_72_000000000-C3HGL_1_2110_16430_4265	M01634_72_000000000-C3HGL_1_2110_16430_4265	TGGAGAATCCCGTGAACCATCGAGTCTTTGAACGCA-AGTTGCG-------------CCCCAAGCC-TTCTGGCCGACGGCTCGTCTGCCTGGGTGTC---ACAAAT----CGTCG--------T-----------CC---------------------CC---C------CATC--CTCT-----C-----------------------GAG---GAT----------------A-TGGGACG----AAAGCTGATC-ACCCATGTG----T---TACCG-CACGCAGTTGGCCAAAAT----CCGAGCTA-AGGACG-TCAGGAGCG--TCTT-GACATGCGG----TGGTG------------------AA----------------TTTA-----…
153	>M01634_72_000000000-C3HGL_1_2110_16459_3607	M01634_72_000000000-C3HGL_1_2110_16459_3607	TGCATAATCCCGTGAACCATCGAGTCTTTGAACGCA-AGTTGCG-------------CCCCAAGCC-TTCTGGCCGAGGGCACGTCTGCCTGGGTGTC---ACAAAT----CGTCG--------T-----------CC---------------------CC---C------CATC--CTCT-----C-----------------------GAG---GAT----------------A-GGGGACG----GAATCTGATC-TCCCGTGTG----T---TACCG-CACGTGGTTGGCAAAAAT----CCGAGCTA-AGGATG-CCAGGAGCA--TCTT-GACATGCGG----TGGTG------------------AA----------------TTCA-----…
152	>M01634_72_000000000-C3HGL_1_2110_17855_6060	M01634_72_000000000-C3HGL_1_2110_17855_6060	TGCAGAATCCCGTGAACCATCGAGTCTTTGAACGCA-AGTTGCG-------------CCCCAAGCC-TTCTGGCCGAGGGCACGTCTGCCTGGGTGTC---ACAAAT----CGTCG-------------------TCC---------------------CC---C------CATC--CTCT-----C-----------------------GAG---GAT----------------A-TGGGACG----GAAGCTGGTC-TCCCGTGTG----T---TACCG-CACGCGGTTGGCCAAAAT----CCGAGCTA-AGGGCG-CCAGGAGCG--TCTC-GACATGCGG----TGGTG------------------AA----------------TTTA-----…
198	>M01634_72_000000000-C3HGL_1_2110_19838_2431	M01634_72_000000000-C3HGL_1_2110_19838_2431	TGCAAAATCCCGTGAACCATTGAGTCTTTGAACGCA-AGTTGCG-------------CCCGAATCC-ATTAGGCTAAGGGCACGTCTGCCTGGGTGTC---ACGCGT-CT-AGTTG--------------------CC---------------------CC---C---TGACCAAACTAAT-----CTTCT-------------------AAG---GGATTTTGTCG---GT--TT-TGGGGCG----GAAATTAGCC-TCTTTTGC---------CATGT-TGTGCGGCT-G-G---------C-GA-----AT-GT-----C----G-----C-GACAT-CCG----TGGTTGTA-------------AGAA------------GACCTTCT-----…
796	>M01634_72_000000000-C3HGL_1_2110_20157_28126	M01634_72_000000000-C3HGL_1_2110_20157_28126	TGCAGAATCCCGTGAACCATCGAGTCTTTGAACGCA-AGTTGCG-------------CCCCAAGCC-TTCTGGCCGAGGGCACGTCTGCCTGGGTGTC---ACAAAT----CGTCG-------------------TCC---------------------CC---C------CATC--CTCT-----C-----------------------GAG---GAT----------------A-TGGGACG----GAAGCTGATA-TCCCGTGTG----T---TACCG-CACGTGGTTGGCAAAAAT----CCGAGCTA-AGGATG-CCAGGAGCA--TCTT-GACATGCGG----TGGTG------------------AA----------------TTTA-----…
54	>M01634_72_000000000-C3HGL_1_2110_20495_20712	M01634_72_000000000-C3HGL_1_2110_20495_20712	TGCAGAATCCCGTGAACCATCGAGTCTTTGAACGCA-AGTTACG-------------CCCCAAGCC-TTCTGGCCGAGGGCACGTCTGCCTGGGTGTC---ACAAAT----CGTCG--------T-----------CC---------------------CC---C------CATC--CTCT-----C-----------------------GAG---GAT----------------A-TGGGACG----GAAGCTGATC-TCCCGTGTG----T---TACCG-CACGCGGTTGGCCAAAAT----CCAAGCTA-AGGACG-TCAGAAGCG--TCTT-GACATGCGG----TGGTG------------------AA----------------TTTA-----…
745	>M01634_72_000000000-C3HGL_1_2110_22100_12170	M01634_72_000000000-C3HGL_1_2110_22100_12170	TGCAGAATCCCGTGAACCATCGAGTCTTTGAACGCA-AGTTGCG-------------CCCCAAGCC-TTCTGGCCGAGGGCATGTCTGCCTGGGTGTC---ACAAAT----CGTCG-------------------T-C---------------------CC---C------C-TA--CTCT-----C-----------------------GAG---GAT----------------A-TGGGACG----GAAGCTGATC-TCCCGTGTG----T---TACCG-CACGCGGTTGGCCAAAAT----CCAAGCTA-AGGACG-TCAGAAGCG--TCTT-GACATGCGG----TGGTG------------------AA----------------TTTA-----…
277	>M01634_72_000000000-C3HGL_1_2110_22411_5085	M01634_72_000000000-C3HGL_1_2110_22411_5085	TACGGTATCCCGTGAACCATCGAGTCTTTGAACGCA-AGATGCG-------------CCCCAAGCC-TTCTGGCCGAGGGAACGTCTGCCTGGGTGTC---ACAAAT----CGTCA--------T-----------CC---------------------CC---C------CATC--CTCT-----C-----------------------GAG---GAT----------------A-TGGGACG----GAAGCTGATC-GCCCGTGTG----T---TACCG-CACGCGGTTGGCCAAAAT----CCAAGCTA-AGGACA-CCAGGAGCA--TCTT-GACATGTGA----TGGTG------------------AA----------------TTCA-----…
366	>M01634_72_000000000-C3HGL_1_2110_2258_15478	M01634_72_000000000-C3HGL_1_2110_2258_15478	TGCAGAATCCCGTGAACCATCGAGTCTTTGAACGCA-AGTTGCG-------------CCCCAAGCC-TTCTGGCCGAGGGCACGTCTGCCTGGGTGTC---GCAAAT----CGTCG-------T------------CC---------------------CC---C------CATC--CTCT-----C-----------------------GAG---GAT----------------A-TGGGACG----GAAGCTGATC-TCCCGTGTG----T---TACCG-CACGCGGTTGGCTAAAAT----CCGAGCTA-AGGATG-CCAGAAGCG--TCTT-GACATGCGG----TGGCA------------------AA----------------TTCA-----…
672	>M01634_72_000000000-C3HGL_1_2110_22637_9891	M01634_72_000000000-C3HGL_1_2110_22637_9891	TGCAGAATCCCGTGAACCATCGAGTCTTTGAACGCA-AGTTGCG-------------CCCCAAGCC-TTCTGGCCGAGGGCACGTCTGCCTGGGTTTC---ACAAAT----CGTCG--------T-----------CC---------------------CC---C------CATC--CTCT-----C-----------------------GAG---GAT----------------A-TCGGACG----GAAGCTGGTC-TCCCGTGTG----T---TACCG-CACGCGGTTGGCCAAAAT----CCTAGCTA-AGGATG-CCAGGAGCG--TCTT-GACATGCGG----TGGTG------------------AA----------------TTCA-----…
729	>M01634_72_000000000-C3HGL_1_2110_23248_9896	M01634_72_000000000-C3HGL_1_2110_23248_9896	TGCAGAATCCCGTGAACCATCGAGTCTTTGAACACA-AGTTGCG-------------CCCCAAGCC-TTCTGGCCTAGGGCACGTCTGCCTGGGTGTC---ACAAAT----CGTCG-------T------------CC---------------------CC---C------CATC--CTCT-----C-----------------------GAG---GAT----------------A-TGGGACG----GAAGCTGATC-TCCCGTGTG----T---TACCG-CACGCGGTTGGCCAAAAT----CCGAGCTA-AGGACG-TCAGGAGCG--TCTT-GACATGCGG----TGGTG------------------AA----------------TTTA-----…
734	>M01634_72_000000000-C3HGL_1_2110_23851_17434	M01634_72_000000000-C3HGL_1_2110_23851_17434	TGCAGAATCCCGTGAACCATCGAGTCTTTGAACGCA-AGTTACG-------------CCCCAAGCC-TTCTGGCCGAGGGCACGTCTGCATGGGTGTC---ACAAAT----GGTCA--------T-----------CC---------------------CC---C------CATC--CTCT-----C-----------------------GAG---GAT----------------A-TGGAACG----GAAGCTGATC-TCCCCTGTG----T---TACCG-CATGCGGTTGGCCAAAAT----CCGAGCTA-AGGACG-CCAGGAGCG--TCTT-GACATGCGG----TGGTG------------------AA----------------TTCA-----…
309	>M01634_72_000000000-C3HGL_1_2110_24218_19009	M01634_72_000000000-C3HGL_1_2110_24218_19009	TACAGAATCCCGTGAACCATCGAGTCTTTGAACGCA-AGTTGCA-------------CCCCAAGCC-TTCTGGCCGAGGGCACGTCTGCCTGGGTGTC---ACAAAT----CGTTG--------T-----------CC---------------------CC---C------CATC--CTCT-----C-----------------------GAG---GAT----------------A-TGGGACG----GAAGCTGATC-TCCCGTGTG----T---TACCG-CACGCGGTTGGCCAAAAT----TTGAGCTA-AGGACG-CCAGGAGCG--TCTT-GACATGCGG----TGGTG------------------AA----------------TTCA-----…
498	>M01634_72_000000000-C3HGL_1_2110_24892_20918	M01634_72_000000000-C3HGL_1_2110_24892_20918	TGCAGAATCCCGTGAATCACCGAGTCTTTGAACGCA-AGTTGCG-------------CCCAAAGCC-TTTAGGTTGAGGGCACGTCTGCCTGGGCGTC---ACGTAT--CCCGTCG-----CAC------------CC---------------------CC---A---ACCCGTCCCAACT-----C-----------------------GGGCATGAT-----------GGCTGGTGGGAGCG----GATATTGGCC-TCCCGTGTA--------CTCGC-GTTACGGTTGGTCTAAAA----TTGAGCCC-CGAGCA---ACGAACG--TCAC-GACAAGTGG----TGGTC------------TGTAATAG------------CTATTTCA-----…
230	>M01634_72_000000000-C3HGL_1_2110_25071_10289	M01634_72_000000000-C3HGL_1_2110_25071_10289	TGCAGAATCCCGTGAACCATCGAGTCTTTGAACGCA-AGTTGCG-------------CCCCAAGCC-TTCTGGCCGATGGCACGTCTGCCTGGGTGTC---ACAAAT----CGTCG-------------------TCC---------------------CC---C------CATC--CTCT-----C-----------------------GAG---GAT----------------A-TGGGACG----GAAGCTGATC-TCCCGTGTG----T---TACCG-CACGCGGTTGGCCAAAAT----CCAAGCTA-TGGACG-CCAGGAGAG--TCTT-GACATGCGG----TGGTG------------------AA----------------TTCA-----…
810	>M01634_72_000000000-C3HGL_1_2110_27216_15878	M01634_72_000000000-C3HGL_1_2110_27216_15878	TGCAGAATCCCATGAACCATCGAGTATTTGAACGCA-AGTTGCG-------------CCCCAAGCC-TTCTGGCCGAGGGCACGTCTGCCTGGGTGTC---ACAAGT----CGTCG-------------------TCC---------------------CC---C------CATC--CTCT-----C-----------------------GAG---GAT----------------A-TGGGACG----GAAGCTGATC-TCCCGTGTG----T---TACCG-CACGCGGTTGGCCAAAAT----CCAAGCTA-AGGACG-TCAGGAGCG--TCTT-GACATGCGG----TGGTG------------------AA----------------TTCA-----…
432	>M01634_72_000000000-C3HGL_1_2110_28389_18086	M01634_72_000000000-C3HGL_1_2110_28389_18086	TGCAGAATCCCGTGAACCATCGAGTCTTTGAACGCA-AGTTGCG-------------CCCCAAGCC-TTCTGTCCGAGGGCACGTCTGCCTGGGTGTC---ACAAAT----CATCG--------T-----------CC---------------------CC---C------CATC--CTCT-----C-----------------------GAG---GAT----------------A-TGGGACG----GAAGCTGATC-TCCCGTGTG----T---TACCG-CACGCGGTTGGCCAAAAT----CCAAGCTA-AGGACA-CCAGGAGCA--TCTT-GACATGTGA----TGGTG------------------AA----------------TTCA-----…
353	>M01634_72_000000000-C3HGL_1_2110_3057_13723	M01634_72_000000000-C3HGL_1_2110_3057_13723	TGC-GAATCCCGTGAACCATCGAGTCTTTGAACGCA-AGTTGCG-------------CCCCAAGCC-TTTTAGCCGAGGGCACGTCTGCCTGGGTGTC---ACAAAT----CGTCG--------T-----------CC---------------------CC---C------TATC--CTCT-----C-----------------------GAG---GAT----------------A-TGGGACG----GAAGCTGATC-CCCAGTGTA----T---TACTG-CACGCGGTTGGCCAAAAT----CCGAGCTA-AGGACG-CAAGGAGTG--TCTT-GACATGCGG----GTGTG------------------AA----------------TTCA-----…
451	>M01634_72_000000000-C3HGL_1_2110_3269_14826	M01634_72_000000000-C3HGL_1_2110_3269_14826	TGCAGAATCCCGTGAACCATCAAGTTTTTTAACGCA-AGTTGGG-------------CTCGAGGCC-TCCTGGTCGATGACACTTCTGCCTGGGTGTC---ACGCAT----CGTCG--------------------CC---------------------CC---C------ACTCTCCTCGGCTCAC-----------------------GAG---GAC------------------GAGGGCG----AATACTGGTC-T-CCGCGCG----C---TCCCG-CCCGTAGTTGGCCTAAAA----TCGAGTCC-CCGGCG---ACGGTCG--CCAC-GACAAGCGG----TGGTTGAG---------------AG-------------------------…
259	>M01634_72_000000000-C3HGL_1_2110_4069_16548	M01634_72_000000000-C3HGL_1_2110_4069_16548	TGCAGAATCCCGTGAACCATCGAGTCTTTGAACGCA-AGTTGCG-------------CCCCAAGCC-TTCTGGCCGAGGGCACGTCTGCCTGGGTGTC---ACAAAT----CGTCG--------T-----------CC---------------------CC---C------CATC--CTCT-----C-----------------------GAG---GAT----------------A-TGGGACG----GAAGCTGATC-TCCCGTGTG----T---TACCG-CACGCGGTTGGCCAAAAT----CCAAGCTT-AGGACG-CCTGGAGCA--TCTT-GACATGCGG----TGGTG------------------AA----------------TTCA-----…
91	>M01634_72_000000000-C3HGL_1_2110_5191_22551	M01634_72_000000000-C3HGL_1_2110_5191_22551	TGCAGAATCTCGTGAACCATCGAGTCTTTGAACGCA-AGTTGCG-------------CCCCAAGCC-TTCTGGCCGAGGGCACGTCTGCCTGGGTGTC---ACAAAT----CGTCG-------T-C----------CC---------------------CC---C------CATC--CTCT-----C-----------------------GAG---GAT----------------A-TCAGATG----GAAGCTGGTC-ACCCGTGTG----T---TACCA-CACGCGGTTGGCCAAAAT----CCGAGCTA-AGGATG-CCAGGAGCG--TCTT-GACATGCGG----TGATG------------------AA----------------TTCA-----…
515	>M01634_72_000000000-C3HGL_1_2110_7461_20801	M01634_72_000000000-C3HGL_1_2110_7461_20801	TGTAGAATCCCGTGAATCACCGAGTCTTTGAACGCA-AGTTGTG-------------CCCAAAGCC-TTTAGGCTAATGGCACGTCTACCTGGGCATC---ACATAT--TCCGTTT-----CAC------------CC---------------------CC---A---ACCCGTCCCAACT-----C-----------------------GGGAATGAT-----------GGCTGGTGGGAGCG----GATATTGGCC-TCCCGTGTA--------CTCGC-GTTACGGTTGGTCTAAAA----TCGAGCCC-CGAGCG---ACGAACG--TCAC-GACAAGTGG----TGGTC------------TGTAATAG------------CTATTTCG-----…
88	>M01634_72_000000000-C3HGL_1_2111_11163_23885	M01634_72_000000000-C3HGL_1_2111_11163_23885	TGCAGAATCCTGTGAACCATCGAGTCTTTGAACCCA-AGTTGCG-------------CCCCAAGCC-TTCTGGCTGAGGGCACATCTGCCTGGGTGTC---ACAAAT----CGTCG--------------------TC-------------------CACC---C------CATC--CTCT-----C-----------------------GAG---GAT----------------A-TGGGACG----GAAGCTGATC-TCCCGTGTG----T---TACCG-CACGCAGTTGGCCAAAAT----CCGAGCTA-AGGACG-CTAGAAGCG--TCTT-GACATGCGG----TGGTG------------------AA----------------TTCA-----…
541	>M01634_72_000000000-C3HGL_1_2111_11697_12283	M01634_72_000000000-C3HGL_1_2111_11697_12283	TGCAGAATCCCGTGAACCATCGAGTCTTTGAACGCA-GGTTGCG-------------CCCCAAGCC-TTCTGGCCGAGGGCACGTCTGCTTGGGTGTC---ACAAAT----CGTCG-------------------TCC---------------------CC---C------CATC--CTCT-----C-----------------------GAG---GAT----------------A-TGGGACG----AAAGCTGATC-TCCCGTGTG----T---TACCG-CACGCGGTTGGCCAAAAT----CCGAGCTA-AGGACA-TCAGTAGCG--TCTT-GACATGCGG----TGGTG------------------AA----------------TTTA-----…
375	>M01634_72_000000000-C3HGL_1_2111_12378_13117	M01634_72_000000000-C3HGL_1_2111_12378_13117	TGCAGAATCCCGTGAACCATCGAGTCTTTGAACGCA-AGTTGCG-------------CCCGAAGCC-TTCTGGCTGAGGGCACGTCTGCCTGGGCGTC---ACATAT----CGTTG--------------------CC---------------------CG-------------ATGCCAA-----TTTCC--TCTTGATAAGGAGGTATG-C---TGT----------------G-CAGGGTG----GATGTTGGCC-TCCCGTGAA----CTCTTTTTG-GTCATGGTTGGTTGAAAA----TTGAGACC-TTGGTA---GGGTGTG--CCAT-GATAGATGG----TGGTTGTG-TGATCCACGAGACCAA-----------------TCA-----…
771	>M01634_72_000000000-C3HGL_1_2111_13417_18345	M01634_72_000000000-C3HGL_1_2111_13417_18345	TGCAGAATCCCGTGAACCATCGAGTTTTTGAACGCA-AGTTGCG-------------CCTGAAGCC-ATTAGGCCGAGGGCACGTCTGCCTGGGCGTC---ACGCAT--TGTGTCG--------------------CT---------------------CA---C------------CCGC-----CCCGAGCCTTACCAAGGATTGGGTGTG---GGT--------------------GGGCG----GATATTGGCC-CCCCGTGCA----C---ATTAG-TGAACGGTCGGCCTAAAT---ACAAAGTCC-TTGGCA---ATGGACG--TCAC-AACAAGTGG----TGGTTG---------------ACAA------------ACCGTTGC-----…
746	>M01634_72_000000000-C3HGL_1_2111_13701_9330	M01634_72_000000000-C3HGL_1_2111_13701_9330	TGCAGAATCCCGTGAACCATCGAATCTTTGAACGCA-AGTTGCG-------------CCCCAAGCC-TTCTGGCCGAGGGCACGTCTGCCTGAGTGTC---ACAAAT----CGTCG-------T------------CC---------------------CC---C------CATC--CTCT-----C-----------------------GAG---GAT----------------A-TGGGACG----GAAGCTGATC-TCCCGTGTG----T---TACCG-CACGCGGTTGGCCAAAAT----CCGAGCTA-AGGACG-TCAGAAGCG--TCTT-GACATGCGG----TGGTG------------------AA----------------TTCA-----…
737	>M01634_72_000000000-C3HGL_1_2111_15520_16570	M01634_72_000000000-C3HGL_1_2111_15520_16570	TGCAGAATCCCGTGAACCATCGAGTCTTTGAACGCA-AGTT-CG-------------CCCCAAGCC-TTCTGGCCGAGGGCACGTCTGCCTGGGTGTC---ACAAAT----CGTCG-------T------------CC---------------------CC---C------CATC--CTCT-----C-----------------------GAG---GAT----------------A-TCGGACG----GAAGCTGGTC-TCCCGTGTG----T---TACCG-CACGCGGTTGGCCAAAAT----CCGAGCTA-AGGAAG-CCAGGAGTG--TCTT-GACATGCAG----TGGTG------------------AA----------------TTCA-----…
535	>M01634_72_000000000-C3HGL_1_2111_15612_24193	M01634_72_000000000-C3HGL_1_2111_15612_24193	TGCAGAATCCCGTGAACCATCGAGTCTTTGAACGCA-AGTTGCG-------------CCCCAAGCC-TTCTGGCCGAGGGCACGTCTGCCTGGGTGTC---ACAAAT----CGTCG-------------------TCC---------------------CC---C------CATC--CTCT-----C-----------------------GAG---GAT----------------A-TCGGACG----GAAGCTGATC-TCCCGTGTG----T---TACCG-CACGCGGTTGGCCAAAAT----CCGAGCTA-AGGACG-CCAGGAGCG--TCTT-GAGCGGCGG----TGGTG------------------AA----------------TTCA-----…
33	>M01634_72_000000000-C3HGL_1_2111_15833_24215	M01634_72_000000000-C3HGL_1_2111_15833_24215	TGCAGAATCCCGTGAACCATCGAGTCTTTGAACGCA-AGTTGCG-------------CCCGAAGCC-ATTAGGCCGAGGGCACGCCTGCCTGGGCGTC---ACGCAT--CGCGTCG--------------------CC---------------------CC----------CACTCCCTCG-----C-----------------------GGG---GGA----------------TCGGGGGCG----GAGATTGGCC-CCCCGTGCGCGCAG---CTGTG-CGCGCGGTCGGCCCAAAT----GCGAATCCGCCGTCG---ACGCACG--TCGC-GACCAGTGG----TGGTTG-----------------AA----------------TCCA-----…
364	>M01634_72_000000000-C3HGL_1_2111_16252_17955	M01634_72_000000000-C3HGL_1_2111_16252_17955	TGCAGAATCCTGTGAACCATCGAGTCTTTGAACGCA-AGTTGCG-------------CCCCAAGCT-TTCTGGCCGAGGGCACGTCTGGCTGGGTGTC---ACAAAT----ATTCG--------T-----------CC---------------------CC---C------CATC--CTCT-----C-----------------------GAG---GAT----------------A-GGGGACG----GAAGCTGATC-TCCCGTGTG----T---TACCG-CATGCGGTTGGCCAAAAT----CCAAGCTA-AGGACG-CCAGGAGCG--TCTT-GACATGCGG----TGGTG------------------AA----------------TTCA-----…
704	>M01634_72_000000000-C3HGL_1_2111_16386_24892	M01634_72_000000000-C3HGL_1_2111_16386_24892	TGCAGAATCCCGTGAACCATCGAGTCTTTGAACGCA-AGTTGCG-------------CCCCAAGCC-TTGTGGCCGAGGGCACGTCTGCCTGGGTGTC---ACAAAT----CATCG--------------------TC---------------------CC---C--------CCTACTCT-----C-----------------------GAG---GAT----------------A-TGGGACG----GAAGCTGATC-TCCCGTGTG----T---TACCG-CACGCGGTTGGCCAAAAT----CCAAGCTA-AGGACG-TCAGAAGAG--TCTT-GACATGCGG----TGGTG------------------AA----------------TTTA-----…
785	>M01634_72_000000000-C3HGL_1_2111_16725_10367	M01634_72_000000000-C3HGL_1_2111_16725_10367	TGCAGAATCCCGTGAACCATCGAGTCTTTGAACGCA-AGTTGCG-------------CCCCAAGCC-TTCTGGCCGAGGGCACGTCTGCCTGGGTGTC---ACAAAT----CGTCG--------T-----------CC---------------------CC---C------CATC--CCCT-----C-----------------------GAG---GAT----------------A-TGGGATG----GAAGCTGATC-TCCCGTGTG----T---TACCG-CATGCGGTTGGCTAAAAT----CAAAGC---------------------------------------------------------------------------------TCA-----…
681	>M01634_72_000000000-C3HGL_1_2111_16778_23176	M01634_72_000000000-C3HGL_1_2111_16778_23176	TGCAGAATCCCGTGAACCATCGAGTCTTTGAACGCA-AGTTGCG-------------CCCCAAGCC-TTCTGGCCGAGGGCACGTCTGCCTGGGCGTC---ACACGT----CGTTG--------------------CC---------------------CC---C---C--CGAC-CCCTT-----C-----------------------GGG---GGT-----------CG--GA-CGGGGCG----GATGATGGCCTTCCCGTGTG--------CCCCGTCACGCGGTTGGCATAAAT---ACCGAGTCC-TCGGCG---ACCGGCG--TCGC-GGCGATCGG----TGGTTGT----------------CA------------AACCTCGG-----…
150	>M01634_72_000000000-C3HGL_1_2111_17353_3697	M01634_72_000000000-C3HGL_1_2111_17353_3697	TGCAGAATCCCGTGAACCATCGACTCTTTGAACGCA-AGTTGCA-------------CCCCAAGCC-TTCTGGCCGAGGGCACGTCTGCCTGGGTGTC---ACAAAT----CATCG--------T-----------CC---------------------CC---C------CATC--CTCT-----C-----------------------AAG---GAT----------------A-TGGGACG----GAAGCTGTTC-TCCCGTGTG----T---TACCG-CACGCGGTTGGCCAAAAT----CCAAGCTA-AGGACG-CCAGGAACG--TCTT-GACATGCGT----TGGTG------------------AA----------------TTCA-----…
229	>M01634_72_000000000-C3HGL_1_2111_20890_2921	M01634_72_000000000-C3HGL_1_2111_20890_2921	TGCAGAATCCCGTGAACCATCGAGTCTTTGAACGCA-AGTTGCG-------------CCCCAAGCC-TTCTGGCCGAGGGCACGTCTGCCTGGGTGTC---ACAAAT----CTTCA-------------------TCC---------------------CC---C------CATC--CTCT-----C-----------------------GAT---GAT----------------A-AGGGACG----GAAGCTGATC-TCCCGTGTG----T---TACCG-CACGTGGTTAGCAAAAAT----CCGAGCTA-AGGATG-CCAGGAGCA--TCTT-GACATGCGG----TGGTG------------------AA----------------TTCA-----…
387	>M01634_72_000000000-C3HGL_1_2111_21361_11869	M01634_72_000000000-C3HGL_1_2111_21361_11869	TGCAGAATCCCGTGAACCATCGAGTCTTTGAACGCA-AGTTGCG-------------CCCGAGGCC-TCCTGGTCGAGGGCACGTCTGCCTGGGTGTC---ACGCAT----CGTCG--------------------CC---------------------CC---C-------CTCCCCTCGGCTCAC-----------------------GAG---GGC------------------GGGGGCG----GATACTGGTC-TCCCGCGCG----C---TCCCG-CCCGTGGTTGGCCTAAAA----TCGAGTCC-CCGGCG---ACGGTCG--CCAC-GACAAGCGG----TGGTTGA----------------GA------------GACCCTCG-----…
453	>M01634_72_000000000-C3HGL_1_2111_21672_23199	M01634_72_000000000-C3HGL_1_2111_21672_23199	TGCAGAATCTCGTGAACCATCGAGTCTTTGAATGCA-AGTTGCG--------------CCCAAGCC-TTCTGACCGAGGGCACGTCTGCCTGGGTGTC---ACAAAT----CGTCG-------T------------CC---------------------CC---C------AATC--CTCT-----C-----------------------GAG---GAT----------------A-TCCGACG----GAAGCTGGTC-TCAAGTGTG----T---TACCG-CACGCGGTTGGCCAAAAT----CCGAGCTA-AGGATG-CCAGGAGCG--TCTT-GACATGCGG----TGGTG------------------AA----------------TTCA-----…
501	>M01634_72_000000000-C3HGL_1_2111_22473_15600	M01634_72_000000000-C3HGL_1_2111_22473_15600	TGCAGAATCCCGTGAACCATCGAGTCTTTGAACGCA-AGTTGCG-------------CCCGAGGCC-TCCTGGTCGAGGGCACGTCTGCCTGGGCGTC---ACGTAT--CCCGTCG-----CAC------------CC---------------------CC---A---ACCCGTCCCAACT-----C-----------------------GGG---AAT--GATGGC---TG--GT-GGGAGCG----GATATTGGCC-TCCCGTGTA--------CTCCC-GTTACGGTTGGTCTATAA----TCGAGCCC-CGAGCG---ACGAACG--TCAC-GACAAGTGG----TGGTC------------TGTAATAG------------CTATTTCG-----…
131	>M01634_72_000000000-C3HGL_1_2111_23166_20178	M01634_72_000000000-C3HGL_1_2111_23166_20178	TGCAGAATCCCATGAACCATCGAGTCTTTGAACGCA-AGTTGCG-------------CCCCAAGCC-TTCTGGCCGAGGGCACGTCTCCCTGGGTGTC---ACAAAT----CGTCG--------T-----------CC---------------------CC---C------CATC--CTCT-----C-----------------------GAG---GAT----------------A-TGGGATG----AAAGCTGATC-TCCCATGTG----T---TACCG-CACGCGGTTGGCCAAAAT----CCAAGCTA-AGGACG-CCAGGAGCG--TCTT-GACATGCGG----TGGTG------------------AA----------------TTCA-----…
613	>M01634_72_000000000-C3HGL_1_2111_23941_11834	M01634_72_000000000-C3HGL_1_2111_23941_11834	TGCAGAATCCCGTGAACCATCGAGTCTTTGAACGCA-AGTTGCG-------------CCCGAAGCC-ATCAGGCCGAGGGCACGCCTGCCTGGGCGTC---ACACGC----CGTTGC-------C-----------CC---------------------CC---C-----CGCGCATCCCT-----C-----------------------GGG---ATC-----------GTC-GG--GGGGCG----GACGATGGCC-TCCCGTGCG----T---CACCT-CGCGCGGTTGGCACAAAT---GTCGGGTCC-TCGGCG---ACGAACG--CCAC-GACAATCGG----TGGTCG--------TCGAACCTCGG-----------------TTG-----…
260	>M01634_72_000000000-C3HGL_1_2111_24438_8532	M01634_72_000000000-C3HGL_1_2111_24438_8532	TGCAGAATCCCGTGAACCATCGAGTCTTTGAACGCA-AGTTGCG-------------CCCCAAGCC-TTCTGGCCGAGGGCACGTCTGCCTGGGTGTC---ACAAAT----CGTCG-------T------------CC---------------------CC---C------CATC--CTCT-----C-----------------------GAG---GAT----------------A-TGGGATG----GAAGCTGATC-TCCCGTGTG----T---TACCG-CACGCGGTTGGCCAAAAT----CCGAGCTA-AGGATG-TCAGAAGCG--TCTT-GACATGCGG----TGGTG------------------AA----------------TCTA-----…
636	>M01634_72_000000000-C3HGL_1_2111_25114_14273	M01634_72_000000000-C3HGL_1_2111_25114_14273	TGCAGAATCCCGTGAACCATCGAGTCTTTGAACGCA-AGTTGCG-------------CCCCAAGCC-TTCTGGCCGAGGGCACGTCTGCCTGGGTGTC---ACAAAC----CGTCG-------------------TCC---------------------CT---C------TCAT--CCTT-----C-----------------------TCG---GAT----------------A-AGGGACG----GAAACTGGTC-TCCCGTGTG----T---TACCG-CACGCGGTTGGCCAAAAT----CCGAGCTA-AGAACG-TCAGGAGCG--TCTT-GACATGCGG----TGGTG------------------AA----------------TTTA-----…
41	>M01634_72_000000000-C3HGL_1_2111_27826_15451	M01634_72_000000000-C3HGL_1_2111_27826_15451	TGCAGAATCCCGTGAACCATCGAGTCTTTGAACGCA-AGTTGCG-------------CCCGAGGCC-TCCTGGTCGAGGGCACGTCTGCCTGGGTGTC---ACGCAT----CGTCG--------------------CC---------------------CC---C------GCTCCCCTCGGCTCAC-----------------------GAG---GGC------------------GGGGGCG----GATACTGGTC-TCCCGCGCG----C---TCCCG-CCCGTGGTTGGCCTAAAA----TCGAGTCC-CCGGCG---ACGGTCG--CCAC-GACAAGCGG----TGGTTGAG---------------AG-------------------------…
328	>M01634_72_000000000-C3HGL_1_2111_2821_20339	M01634_72_000000000-C3HGL_1_2111_2821_20339	TGCAAAATCCCGTGAACCATCGAGTCTTTGAACGCA-AGTTGCG-------------CCCCAAGCT-TTCTGGCTGAGGGCACGTCTGCCTGGGTGTC---ACAAAT----ATTCG-------T------------CC---------------------CC---C------CATA--CTCT-----C-----------------------GAG---GAT----------------A-GGGGACG----GAAGCTGATC-TCCCGTGTG----T---TTCCG-CATGCGGTTGGCCAAAAT----CCGAGCTA-AGGACG-CAAGGAGCG--TCTT-GACATGCGG----TGGTG------------------AA----------------TTCA-----…
32	>M01634_72_000000000-C3HGL_1_2111_5074_14901	M01634_72_000000000-C3HGL_1_2111_5074_14901	TGCAGAATCCCGTGAACCATCGAGTCTTTGAACGCA-AGTTGCG-------------CCCG-AGGC-TTCTGGCCAAGGGCACGTCTGTCTGGGCGTC---ACGCAT----CG-CA------------------ACCC---------------------CC---CACAAC-C-ACTT-C-G-----------------------------GTA---GTT----------------G-AGGGGAG----GAGGATGGTT-TCCCGTGCC--------TCACCGGGCGCGGTTGGCCTAAATA---AGGAGCCT-AAGGCA---TCGGGTTG-CCGC-GGCGATAGG----TGGAGT-----------------------------------ACAA-----…
304	>M01634_72_000000000-C3HGL_1_2111_6326_10600	M01634_72_000000000-C3HGL_1_2111_6326_10600	TGCAGAATCCCGTGAACCATCGAGTCTTTGAACGCA-AGTTGCG-------------CCCCAAGCC-TTCTGGCCGAGGGCACGTCTGCCTGGGTGTC---ACAAAT----CGTCG--------T-----------CC---------------------CC---C------CATC--CTCT-----C-----------------------GAG---GAT----------------A-TGGGACG----GAAGCTGATC-TCCCGTGTG----T---TACCG-CACGCGGTTGGCCAAAAT----CCGAGCTA-AGGACG-TCAGGAGCG--TCTT-GACATGCGC----TGGTG------------------AC----------------TTCA-----…
630	>M01634_72_000000000-C3HGL_1_2111_8040_7851	M01634_72_000000000-C3HGL_1_2111_8040_7851	TGCAGAATCACGTGAACCATCGAGTCTTTGAACGCA-AGTTGCG-------------CCCCAAGCC-TTCTGGCCGAGGGCAAGTCTGCCTGGGTGTC---ACAAAT----CGTCC--------T-----------CC---------------------CC---C------CATC--CTCT-----C-----------------------GAG---GAT----------------A-TGGGACG----GAAGCTGATC-CCCCGTGTG----T---TACCG-CACACGGTTGGCCAAAAT----CCGAGCTA-AGGACG--------------------------------------------------------------------------------…
717	>M01634_72_000000000-C3HGL_1_2111_8073_4623	M01634_72_000000000-C3HGL_1_2111_8073_4623	TGTAGAATCCCGTGAACCATCGAGTCTTTGAACGCA-AGTTGCG-------------CCCCAAGCT-TTCTGGCCGAGGGCACGTCTGGCTGGGTGTC---ACAAAT----ATTCC--------T-----------CC---------------------CC---C------CATC--CTCT-----C-----------------------GAG---GAT----------------A-GGGGACG----GAAGCTGATC-TCCCGTGTG----T---TACCG-CATGCGGTTGGCCAAAAT----CCAAGCTA-AAGACG-CCAGGAGCG--TCTT-GACATGGGG----TGGTG------------------AA----------------TTCA-----…
749	>M01634_72_000000000-C3HGL_1_2111_8913_19162	M01634_72_000000000-C3HGL_1_2111_8913_19162	TGCAGAATCCCGTGAACCATCGAGTCTTTGAACGCA-AGTTGCG-------------CCCCAAGCC-TTCTGGCCGAGGGCACGTCTGCCTGGGTGTC---ACAAAT----CGTCG-------------------TCC---------------------CC---C------CATC--CTCT-----C-----------------------GAG---GAT----------------A-TCGGACG----GAAGCTGGTC-TCCCGTGTG----T---TACCG-CACGCGGTTGGCCAAAAT----CCGAGCTA-AGGACG-CCAGGAGCG--TCTT-GACATGTAG----TGGTG------------------AA----------------TTCA-----…
89	>M01634_72_000000000-C3HGL_1_2111_9554_22025	M01634_72_000000000-C3HGL_1_2111_9554_22025	TGCAGAATCCCGTGAACCATCGAGTCTTTGAACGCA-AGTTGCG-------------CCCCAAGCC-TTCTGGCCGAGGGCACGTCTGCCTGGGTGTC---ACAAAT----CGTCG--------T-----------CC---------------------CC---C------CATC--TTCT-----T-----------------------GAG---GAT----------------A-TGGGACG----GAAACTGATC-TCCCGTGTG----T---TCCCG-CATGCGGTTGGCCAAAAT----CCGAGAAA-AGGACG-TCAGGAGCG--TCTT-GACATGCAG----TGGTG------------------AA----------------TTTA-----…
247	>M01634_72_000000000-C3HGL_1_2112_10844_24152	M01634_72_000000000-C3HGL_1_2112_10844_24152	TGCATAATCCCGTGAACCATCGAGTCTTTGAACGCA-AGTTGCG-------------CCCCAA--------GGCCTAGGGGACGTATGTCTGGGTGTC---ACAAAT----CGTCG-------------------TCC---------------------CC---C------CATC--CTCT-----C-----------------------GAG---GAT----------------A-TGGGACG----GAAGCTGATC-TCCCGTGTG----T---TACCG-CACGCGGTTGGCCAAAAT----CCGAGCTA-AGGACG-TCAGGAGCG--TCTT-GACATGCGG----TGGTG------------------AA----------------TTTA-----…
431	>M01634_72_000000000-C3HGL_1_2112_13051_15257	M01634_72_000000000-C3HGL_1_2112_13051_15257	TGCAGAATCCCATGAACCATCGAGTCTTTGAACGCA-AGTTGCG-------------CCCCAAGCC-TTCGGGCCGAGGGCACGTCTGCCTGGGTGTC---ACATAT----CGTCG-------------------TCC---------------------CC---C------CATC--CTCT-----C-----------------------GAG---GAT----------------A-TGGGACG----GAAGCTGATA-TCCCGTGTG----T---TACCG-CACGTGGTTGGCCAAAAT----CCGAGCTA-AGGACG-TCAGTAGCG--TCGT-GACATGCGG----TGGTG------------------AA----------------TTTA-----…
87	>M01634_72_000000000-C3HGL_1_2112_13797_22771	M01634_72_000000000-C3HGL_1_2112_13797_22771	TGCAGAATCCCGTGAACCATCGAGTCTTTGAACGCA-AGTTGCG-------------CCCCAACCC-TTCTAGCCGAGGGCACGTTTGCCTGGGTGTC---ACAAAT----CTTCA--------------------TC---------------------CC---C------CATC--CTCT-----C-----------------------GAG---GAT----------------A-GGGGACA----GAAGCTGATC-TCCCTTGTG----T---TACCG-CACGTGGTTGGCAAAAAT-------------------------------CCA-----------------------------------------------------------------…
742	>M01634_72_000000000-C3HGL_1_2112_14027_11822	M01634_72_000000000-C3HGL_1_2112_14027_11822	TGCAGAATCCCGTGAACCATCGAGTCTTTGAACGCA-AGTTGCG-------------CCCCAAGCC-TTCTGGCCGAGGGCACGTCTGCCTGGGTGTC---ACAAAT----CGTCG-------T------------CC---------------------CC---C------CATC--CTCT-----C-----------------------GAG---GAT----------------A-TCGGACG----GAAGCTGGTC-TCCCGTGTG----T---TACCG-CACGCGGTTGGCCAAAAT----CCGAGCTA-AGGACG-CCAGGAGCG--CCTT-GACATCCGG----TGGTG------------------AA----------------TTCA-----…
732	>M01634_72_000000000-C3HGL_1_2112_14979_7655	M01634_72_000000000-C3HGL_1_2112_14979_7655	TGC-AGAATC--------------CCGTGAACC-ATCGAGTC-TTTGAACGTCTGCCTGGGTGTC---ACAAAC----CGTCG-------T-C----------CC---------------------TC---T------CATC--CT-T-----C-----------------------TCG---GAT----------------A-TGGGACG----GAAACTGGTC-TCCCGTGTG----T---TACCG-CACGCGGTTGGCCAAAAT----CCGAGCTA-AGGGCG-CCTAGAGCG--TCAC-GACATGCGG----TGGTG------------------AA----------------CTAA--------------------AGC---------------…
211	>M01634_72_000000000-C3HGL_1_2112_15421_12605	M01634_72_000000000-C3HGL_1_2112_15421_12605	TGCAGAATTCCG
170	>M01634_72_000000000-C3HGL_1_2112_15956_4566	M01634_72_000000000-C3HGL_1_2112_15956_4566	TGCAGAATCCCGTGAACCATCGAGTCTTTGAACGCA-AGTTGCG-------------CCCCAAGCC-TTCTGGCCGAGGGCACGTCTGCCTGGGTGTC---ACAAAT----CGTCG-------------------TCC---------------------CC---C------CATC--CTCT-----C-----------------------GAG---GAT----------------A-TGGGACG----GAAGCTGATC-TCCCGTGTG----T---T------AC-C-----G------------C-A--T-------G--CAGGAGCG--TCTT-GACATGTGG----TGGTG------------------AA----------------TTTA-----…
726	>M01634_72_000000000-C3HGL_1_2112_16363_10294	M01634_72_000000000-C3HGL_1_2112_16363_10294	TGCAGAATCCCGTGAACCATCGAGTCTTTAAACGCA-AGTTGCG-------------CCCCAAGCC-TTCTGGCCGAGGGCACGTCTGCCTGGGTGTC---ACAAAT----CGTCG-------------------TCC---------------------CC---C------CATC--CTCT-----C-----------------------GAG---GAT----------------A-TGGGACG----GAAGCTGATC-TCCCGTGTG----T---TACCG-CACGCGGTTGGCCAAAAT----CCGAGCTA-AGGACG-CCAGGAGCG--TCTT-GACATGTAG----TGGTG------------------AA----------------TTCA-----…
53	>M01634_72_000000000-C3HGL_1_2112_16962_4764	M01634_72_000000000-C3HGL_1_2112_16962_4764	TGCAGAATCCCATGAACCATCGAGTCTTTGAACGCA-AGTTGCG-------------CCCCAAGCC-TTCTGGCCGAGGGCACGTCTGCCTGGGTGTC---ACAAAT----CGTCA-----------------T--CC---------------------CC---C------CATC--CTCT-----C-----------------------GAG---GAT----------------A-TGGGACG----GAAGCTGATC-TCCCGTGTG----T---TACCG-CATGCGG------------------------------------------------------------TGGTG------------------AA----------------TTTA-----…
275	>M01634_72_000000000-C3HGL_1_2112_17127_6874	M01634_72_000000000-C3HGL_1_2112_17127_6874	TGCAGAATCCCGTGAACCATCGAGTCTTTGAACGCA-AGTTGCG-------------CCCCAAGCC-TTCTGGCCGAGGGCACGTCTGCCTGGGTGTC---ACAAAT----CGTCG--------T-----------CC---------------------CC---C------CATC--CTCT-----C-----------------------GAG---GAT----------------A-TGGGACG----GAAGCTGATC-TCCCGTGTG----T---TACCG-CACGCGGTTGGCCAAAAT----CCGAGCTA-AGGACG-CCAGGAGCA--TGTT-GACATGCGG----TGGTG------------------AA----------------TTCA-----…
680	>M01634_72_000000000-C3HGL_1_2112_17236_9807	M01634_72_000000000-C3HGL_1_2112_17236_9807	TACAGAATCCCGTGAACCATCGAGTCTTTGAACGTA-AGTTGCG-------------CCCCAAGCC-TTCTGGCCGAGGGCACGTCTGCATGGGTGTC---ACAAAT----CGTCG-------T------------CC---------------------AC---C------CATC--CTCT-----C-----------------------GAG---GAT----------------A-TCGGACG----GAAGCTAGTC-TCCCGTGTG----T---TACCG-CACGCGGTTGGCCAAAAT----CCGAGCTA-AGGATG-CCAGGAGCG--TCTT-GACATGCGG----TGGTG------------------AA----------------TTCA-----…
568	>M01634_72_000000000-C3HGL_1_2112_17470_25176	M01634_72_000000000-C3HGL_1_2112_17470_25176	TGCAGAATCCCGTGAACCATCGAGTCTTTGAACGCA-AGTTGCG-------------CCCCAAGCC-TTCTGGCCGAGGGCACGTCTGCCTGGGTGTC---ACAAAT----CGTCG-------T------------CC---------------------CC---C------CATC--CTCT-----C-----------------------GAG---GAT----------------A-TGGGACG----AAAGCTGATC-TCCCGTGTG----T---TAACG-CACGCGGTTGGCCAAAAT----CCAAGCTA-AGGACG-CCAGGAGCG--TCTT-GACATGCGG----TGGTG------------------AA----------------TTCA-----…
85	>M01634_72_000000000-C3HGL_1_2112_17725_18764	M01634_72_000000000-C3HGL_1_2112_17725_18764	TGCAGAATCCCGTGAACCATCGAATCTTTGAACACA-AGTGGTT-------------CCCCAAGCC-TTCTGGCCGAGGGCACGTCTGCCTGGGTGTC---ACAAAT----CGTCG-------T------------CC---------------------CC---C------CATC--CTCT-----C-----------------------GAG---GAT----------------A-TCGGATG----GAAGCTGGTC-TCCCGTGTG----T---TACCG-CACGCGGTTGGCTAAAAT----CCGAGCTA-AGGATG-CCAGAAGCG--TCTT-GACATGCGG----TGGTG------------------AA----------------TTTA-----…
485	>M01634_72_000000000-C3HGL_1_2112_18867_5153	M01634_72_000000000-C3HGL_1_2112_18867_5153	TACAGAATCCCGTGAATCACCGAGTCTTTGAACGCA-AGTTGTA-------------CCCAAAGCC-TTTAGGCTGAGGGCACGTCTGCCTGGGCATC---ACGTAT--CCTGTCG-----CAC------------CC---------------------CC---A---ACCCATCCCAACT-----C-----------------------AGGTATGAT-----------GGCTGGTGGGAGCG----GATATTGGCC-TCCCGTGTA--------CTCGC-GTTATGGTTGGTTTAAAA----TCGAGCCC-CGAGCG---ACGAACG--TTAC-GATAAGTGG----TGGTC------------TGTAATAG------------TTATTTCG-----…
789	>M01634_72_000000000-C3HGL_1_2112_20142_24390	M01634_72_000000000-C3HGL_1_2112_20142_24390	TGCAGAATCCCGTGAACCATCGAGTCTTTGAACGCA-AGTTGCG-------------CCCCAAGCC-TTCTGGCCGAGGGCACGTCTGCCTGGGTGTC---ACAAAT----CGTCG-------------------TCC---------------------CC---C------CATC--CTCT-----C-----------------------GAG---GAT----------------A-TGGGACG----GAAGCTGATC-TCCCGTGTG----T---TACCG-CACGCGGTTGGCCAAAAT----CCAAGCTA-AGGACG-TCAGAAGCG--TCTT-GACATGCGG----TGGTG------------------AA----------------TTTA-----…
708	>M01634_72_000000000-C3HGL_1_2112_20618_4763	M01634_72_000000000-C3HGL_1_2112_20618_4763	TGCAGTATCCCGTGAACCATTGAGTCTTTGAACGCA-AGTTGCG-------------CCCGAAGCC-ATTAGGCCAAAGGCACGTCTGCCTGGGCGTC---ACGCAT-CT-CGTCA--------------------CC---------------------GC---A---T--CCCTAATTTT-----T-----------------------GTG---TAT--------------------CGGTG----GAATGTGACC-TCCTGG-------T---CCTAGTTGTGCAGTTGGTTAAAAC----TTGAGTATGTGGATT---AGGACT---TCAC-GACAAGTGG----TGGTTGGATA-------------AC------------AACTCTCG-----…
490	>M01634_72_000000000-C3HGL_1_2112_21616_14184	M01634_72_000000000-C3HGL_1_2112_21616_14184	TGTAAAATCCCATGAATCACCGAGTCTTTGAACACA-AGTTGCG-------------CCCAAAGCA-TTTAGGCTTAGGGTACGTCTATCGAGGTGTC---ACATAT--CCCGTCG-----CAT------------CC---------------------CC---A---ACCTGTCCCAACT-----C-----------------------GGGCATGTT-----------GGCTGGTGGTAGCA----GATATTAGCC-TCCCGTGTA--------CTCGC-GTTGTGGTTAGCCTAAAA----TCAAGCCC-CAAGTG---ATGAATG--TCAG-GATAAGTGG----TGGTC------------TGTAATAG------------CTATTTCG-----…
756	>M01634_72_000000000-C3HGL_1_2112_22613_5543	M01634_72_000000000-C3HGL_1_2112_22613_5543	TGCAGAATCCCGTGAACCATCGAGTCTTTGAACGCA-AGTTGCG-------------CCCCAAGCC-TTCTGGCCGAGGGCACGTCTGCCTGGGTGTC---ACAAAT----CATCG----------------T---CC---------------------CC---C------CATC--CTCT-----C-----------------------GAG---GAT----------------A-TGGGATG----GAAGCTGATC-TCCCGTTTG----T---TACCG-CATGCGGTTGGCCAAAAT----CCGAGCTA-AGGATG-TCAGAAGCG--TCTT-GACATGCGG----TGGTG------------------AA----------------TTTA-----…
274	>M01634_72_000000000-C3HGL_1_2112_24178_24244	M01634_72_000000000-C3HGL_1_2112_24178_24244	TGCAGAATCCCGTGAACCATCGAGTCTTTGAACGCA-AGTTGCG-------------CCCCAAGCC-TTCTGGCCGAGGGCACGTCTGCCTGGGTGTC---ACAAAT----CGTCG-------T------------CA---------------------CC---C------CATC--CTCT-----C-----------------------GAG---GTT----------------A-TGGGATG----GAAGCTGATC-TCCTGTGTG----T---TACCG-CACGCGGTTGGCCAAAAT----CCTAGCTA-AGGATG-CCAGGAGCG--TCTT-GACATGCGG----TGGTG------------------AA----------------TTCA-----…
312	>M01634_72_000000000-C3HGL_1_2112_24390_15837	M01634_72_000000000-C3HGL_1_2112_24390_15837	TACAGAATCCCGTGAACCATCGAGTCTTTGAACGTA-AGTTGCG-------------CCCCAAGCC-TTCTGGCCGAGGGCACGTCTGCATGGGTGTC---ACAAAT----CGTCG-------------------TCC---------------------AC---C------CATC--CTCT-----C-----------------------GAG---GAT----------------A-TCGGACG----GAAGCTAGTC-TCCCGTGTG----T---TACCG-CACGCGGTTGGCCAAAAT----CCAAGCTA-AGGACG-TCAGGAGCG--TCTT-GACATGCGG----TGGTG------------------AA----------------TTTA-----…
508	>M01634_72_000000000-C3HGL_1_2112_24702_13107	M01634_72_000000000-C3HGL_1_2112_24702_13107	TGCAGAATCCCGTGAATTACCGAGTCTTTGAATGCA-AGTTGTA-------------CCCAAAGCC-TTTAGGCTGAGGGCACGTCTGCTTGGGCGTA---ACGTAT--CCCGTTG-----CAC------------CC---------------------CC---A---AACCGTACCAACT-----C-----------------------GGGCATGAT-----------GGCTGGTGGGAGCG----GATATTGGCC-TCCCGTGTA--------CTCGC-GTTACGGTTGGTCTAAAA----TTGAGCCC-CGAGCG---ACGAACG--TCAC-GACAAGTGG----TGGTC------------TGTAATAG------------CTATTTCG-----…
532	>M01634_72_000000000-C3HGL_1_2112_25271_8354	M01634_72_000000000-C3HGL_1_2112_25271_8354	TGCAGAATCCCGTGAACCATCGAGTCTTTGAACGCA-AGTTGCG-------------CCCGAAGCC-TTCTGGCTGAGGGCACGTCTGCCTGGGCGTC---ACGCAT--CGCGTCG-----CA-------------TC---------------------CC---A---ACTCGCCTCCTTC-----------------------------GAGAGCAGT-------------AGAGTGGGATCG----GATATTGGTC-CCCCGTGCG--------CACCAGCGCGCGGTCGGCCTAAAT----GCGAACCC-GCGGCG---ACTCGCG--TCGC-GACAAGTGG----TGGTT------------------GA------------ACGCTCAA-----…
620	>M01634_72_000000000-C3HGL_1_2112_5391_23919	M01634_72_000000000-C3HGL_1_2112_5391_23919	GGGGGGGGGGGGGGGGGGGGGGGGGGGGGGGGCGGG-GGGGGCG-------------GCCCAAGCC-TTCTGGCCGAGGGCACGTCTGCCTGGGTGTC---ACAAAC----CGTCG-------T-C----------CC---------------------TC---T------CATC--CT-T-----C-----------------------TCG---GAT----------------A-TGGGACG----GAAACTGGTC-TCCCGTGTG----T---TACCG-CACGCGGTTGGCCAAAAT----CCGAGCTA-AGGGCG-CCTAGAGCG--TCAC-GACATGCGG----TGGTG------------------AA----------------CTAA-----…
629	>M01634_72_000000000-C3HGL_1_2112_6141_22264	M01634_72_000000000-C3HGL_1_2112_6141_22264	TGCAGAATCCCGTGAACCATCGAGTTTTTGAACGCA-AGTTGCG-------------CCCGAGGCC-TCCTGGTCGAGGGCACGTCTGCCTGGGTGTC---ACACAT-TGCCGTTG--------------------CC---------------------CCCTTC------CAATTTCCCA---------------------TTCTTGGGGACGTTGGT----------------AGTCGGGCG----GATATTGGTC-TCCCGTGC---------TCTCG-AGCGCGGTTGGCCCAAAA----GCGAGTCC-CCGACA---ACGGACG--TCAT-GACAAGTGG----TGGTTGA----------------AA------------AGCCTTCT-----…
589	>M01634_72_000000000-C3HGL_1_2112_6581_15935	M01634_72_000000000-C3HGL_1_2112_6581_15935	TGCAGAATCCCGTGAACCATCGAGTCTTTGAACGCA-AGTTGCG-------------CCCGAAGCC-GTTAGGCCGAGGGCACGTCTGCCTGGGTGTC---ACAAAT----CGTCG--------TC----------CC---------------------CC---C------CATC--CTCT-----C-----------------------GAG---GAT----------------A-TGGGACG----GAAGCTGGTC-TCCCGTGTG----T---TACCG-CACGCGGTTGGCCAAAAT----CCTAGCTA-AGGATG-CCAGGAGCG--TCTT-GACATGCGG----TGGTG------------------AA----------------TTTA-----…
86	>M01634_72_000000000-C3HGL_1_2112_8650_19343	M01634_72_000000000-C3HGL_1_2112_8650_19343	TGCAGAATCTCGTAAACCATCGAGTCTTTGAACGCA-AGTTACG-------------CCCCAAGCC-TTCTGGCCGAGGGCACGTCTGCCTGGGTGTC---ACAAAT----CGTCG--------T-----------CC---------------------CC---C------CATC--CTCT-----C-----------------------GAC---GAT----------------A-TGGGACG----GAAGCTGATC-TCTCATGTG----T---TACCG-CATGCGGTTGGCCAAAAT----CCAAGCTA-AGAACG-CCAGGAGCG--TCTT-GACATGCGG----TGGTG------------------AA----------------TTCA-----…
418	>M01634_72_000000000-C3HGL_1_2112_9041_11287	M01634_72_000000000-C3HGL_1_2112_9041_11287	TGCAGAATCCCGTGAACCATCGAGTCTTTGAACGCA-AGTTGCG-------------CCCGAAGCC-ATTAGGCCGAGGGCACGTCTGCCTGGGCGTC---ACACAA----CGTTG-----------------CCCCC---------------------CC---CAAA---CCTCAACCTC-----------------------------GAGGAGGAC----------------G-GGGGGCG----GATGCTGGCC-TCCTGTGCG----C---CACGG-CTCGCGGTTGGCCCAAAT---G-CGAGTGC-TCGGCG---ACGAGCG--CCGC-GGCAATCGG----TGGTTG-----------------------------------TCCA-----…
809	>M01634_72_000000000-C3HGL_1_2112_9189_7291	M01634_72_000000000-C3HGL_1_2112_9189_7291	TGCAGAATCCCGTGAACCATCGAGTCTTTGAACGCA-AGTTGCG-------------CCCGAAGCC-ATTAGGCCGAGGGCACGCCTGCCTGGGCGTC---ACACGT----CGTTGCCC-----------------CC---------------------CC---C---CCAACCCCCCCTC-----------------------------GGG---AGT--------------TGGATGGGACG----GATGATGGCC-TACCGTGTG--------CTCAGTCACGCGGTTGGCATAAAA---AATAAGTCC-TCGGCG---ACTAACG--CCAC-GACAATCGG----TGGTTGTC---------------AA-------------ACCTCTG-----…
765	>M01634_72_000000000-C3HGL_1_2113_12648_23825	M01634_72_000000000-C3HGL_1_2113_12648_23825	TGCAGAATCCCGTCAACCATCGAGTCTTTGAACGCA-AGTTGCA-------------CCCCAAGCC-TTCTGGCCGTGGGCACGTCTGCCTGGGTGTC---ACATAT----CGTCG--------T-----------CC---------------------TC---C------CATC--CTCT-----C-----------------------GAG---GAT----------------A-TGGGACG----GAAGCTGATC-TCCCGTGTG----T---TACCG-CACGTGGTTGGCCAAAAT----CCGAGCTA-AGGACG-CCAAGAGCG--TCTT-GACATGCGG----TGGTG------------------AA----------------TTCA-----…
764	>M01634_72_000000000-C3HGL_1_2113_12716_26253	M01634_72_000000000-C3HGL_1_2113_12716_26253	TGCAGAATCCCGTGAACCATCGAGTCTTTGAACGCA-AGTTGCG-------------CCCCAAGCC-TTCTGGCCGAGGGCACGTCTGCCTGGGTGTC---ACAAAT----ATTCG-------------------TCC---------------------CC---C------CATC--CTCT-----C-----------------------GAG---GAT----------------A-TGGGACG----GAAGCTTATC-TCTTGTGTG----T---TACCG-CACGTGAATGGCCAAAAT----CCGAGCTA-AGGATG-CCAAGAGCG--TCTT-GACATGCAG----TGGTG------------------AA----------------TTTA-----…
430	>M01634_72_000000000-C3HGL_1_2113_15106_2310	M01634_72_000000000-C3HGL_1_2113_15106_2310	TGCAGAATCCCGTGAACCATCGAGTCTTTGAACGCA-AGTTGCA-------------CCCCAAGCC-TTCTGGCCGAGGGCACGTCTGCCTGGGTGTC---ACAAAT----CGTCG-----------------TCCCC---------------------CC---C------CATC--CTCT-----C-----------------------GAG---GAT----------------A-TGGGACG----GAAGCTGATC-TCCCGTGTT----T---TACCG-CACGCGGTTGGCCAAAAT----CCGAGCTA-AGGACG-TCAGTAGTG--TCTT-GACATGCGG----TGGTG------------------AA----------------TTTA-----…
543	>M01634_72_000000000-C3HGL_1_2113_16538_20924	M01634_72_000000000-C3HGL_1_2113_16538_20924	CGCAGAATCCCGTGAACCATCGAGTCTTTGAACGCA-AGTTGCG-------------CCCGAAGCC-TTCTGGCCGAGGGCACATCTGCCTGGGTGTC---ACTAAT----CATCA-------T------------CC---------------------CC---C------CATC--GTCT-----C-----------------------GGA---GAT----------------A-TGGGACG----GAAGCTGATC-TCCCGTGTG----T---TACCG-CACGTGGTTGGCCAAAAT----CCAAGCTA-AGGACG-CCAGGAGCG--TCTT-GACATGCGG----TGGTG------------------AA----------------TTCA-----…
579	>M01634_72_000000000-C3HGL_1_2113_17713_4226	M01634_72_000000000-C3HGL_1_2113_17713_4226	TGCAGAATCCCGTGAACCATAGAGTCTTTGAACGTA-AGTTGCA-------------CCCCAACCC-TTCTGGCCGAGGGCAAGTCTTCCTGGGTGTC---ACAAAT----CATCC-------------------TCC---------------------CC---C------CATC--CTCT-----C-----------------------GAG---GAT----------------A-TGGGACG----GAAGCTGATC-TCCCGTGTG----T---TACCG-CACGCGGTTGGCCAAAAT----CCAAGCTA-AGGACG-TCAGGAGCG--TCTT-GACATGCGG----TGGTG------------------AA----------------TTTA-----…
200	>M01634_72_000000000-C3HGL_1_2113_19627_4448	M01634_72_000000000-C3HGL_1_2113_19627_4448	TGAAGAATCCCGTGAACCATCGAGTCATTGAATGCA-AGTTGCA-------------CTTGAGCCC-TCCTGGTCGAGGGCTCATCTGCCTGGGTGTC---ACAAAT----CGTCG--------------------CC---------------------CC---C------ACTCCCCTCGGCTCAC-----------------------GAG---GGC------------------GGGGGCG----GATACTGGTC-TCCCGCGCG----C---TCCCG-CCCGTGGTTGGCCTAAAA----TCGAGTCC-CCGGCG---ACGGTCG--CCAC-GACAAGCGG----TGGTTGAG---------------AG-------------------------…
298	>M01634_72_000000000-C3HGL_1_2113_19676_3312	M01634_72_000000000-C3HGL_1_2113_19676_3312	TGCAGAATCCCGTGAACCATCGAGTTTTTGAACGCA-AGTTGCG-------------CCCGAAGCC-ATCAGGCCGAGGGCACGTCTGCCTGGGTGTC---ACACGT----CGTTG--------CC----------CC---------------------CC---T------TAGC-CTCCT-----C-----------------------GGA---TGC-----TG--------GG-TGGGACG----GATGATGGCC-TCCCGTGTG----C---TTGGT-CACGCGGTTGGCATAAAT---ATTAAGTCC-TTGGCG---ACTAACG--CCAC-GACAATCGG----TGGTTG---------------TCAA------------A-CCTCTG-----…
290	>M01634_72_000000000-C3HGL_1_2113_19837_7077	M01634_72_000000000-C3HGL_1_2113_19837_7077	TGCAGAATCCCGTGAACCATCGAGTCTTTGAACGCA-AGTTGCG-------------CCTGAAGCC-ATTAGGCCAAGGGCACGTCTGCCTGGGCGTC---ACGCAT-CG-CGTCA--------------------CC---------------------CC---C---TC-CTCCTACTTA-----------------------------------GGT---------------GGATGGGGTG----GAATGTGACC-TCCTGTG----------CCGTGAGGTGCAGTTGGTCGAAAT----TTGAGTCC-GGAGCT---TAGGATG--TCAC-GGCAAGTGG----TGGTTGGA---------------TA------------ACAACTCG-----…
362	>M01634_72_000000000-C3HGL_1_2113_20333_20772	M01634_72_000000000-C3HGL_1_2113_20333_20772	TGCAGAATCCCGTGAACCATCGAGTCTTTGAACGCA-AGTTGCG-------------CCCGAAGCC-ATTAGGCCGAGGGCACGTCTGCCTGGGCGTC---ACACGT----CGTCG-------------------TCC---------------------CC---C------CATC--CTCT-----C-----------------------GAG---GAT----------------A-TGGGACG----GAAGCTGATC-TCCCGTGTG----T---TACCG-CACGCGGTTGGCCAAAAT----CCGAGCTA-AGGACG-TCAGGAGCG--TCTT-GACATGCGG----TGGTG------------------AA----------------TTTA-----…
43	>M01634_72_000000000-C3HGL_1_2113_20918_15615	M01634_72_000000000-C3HGL_1_2113_20918_15615	TGCAGAATCCCGTGAACCATCGAGTTTTTGAACGCA-AGTTGCG-------------CCCTAGGCC-ATCCGGCTGAGGGCACGCCTGCCTGGGCGTC---ACGCAC-TG-AGTCG--------------------CC---------------------CC---T--------TCTTCTCC-----------------------------GAG---GAG------------A--GA-TGGAGCG----GAGATTGGCC-CCCCGTGC---------TTCCG-AGTGCGGTCGGCCTAAAA----CTTGGCCC-TTGGAG---GCCGGCG--TCAC-GATCCGTGG----TGGTTGGC---------------------------------ATCA-----…
166	>M01634_72_000000000-C3HGL_1_2113_21121_7202	M01634_72_000000000-C3HGL_1_2113_21121_7202	TGCATAATCC-CGTGAAC-------------CATCGAGTC-TTTGAACGCAAGTTGCGCCCCAAGCCTTCTA---GCCGAG---GGCACG-------T------------CC---------------------CC---C------CATT--CTCT-----C-----------------------GAG---GAT----------------A-TGGGACG----GAAGCTGATC-TCCCGTGTG----T---TACCG-CATGCGGTTGGCCAAAAT----CCTAGCTA-AGGATG-CCAGGAGCG--TCTT-GACATGCGG----TGGTG------------------AA----------------TTCA--------------------ATT--------…
410	>M01634_72_000000000-C3HGL_1_2113_21441_25274	M01634_72_000000000-C3HGL_1_2113_21441_25274	TGCAGAATCCCGTGAACCATCGAGTCTTTGAACGCA-AGTTGCG-------------CCCGATGCC-ATTAGGTTGAGGGCACGTCTGCCTGGGTGTC---ACATAT----CGAAG--------------------CC---------------------CT---T---CCCCAA-AT--TA-----A-----------------------ACT-----T--------GG---TGTG-CAGGGCG----AATGTTGGCC-TCCCGTGAG--CTT---TATTGCCTCATGGTTGGTTGAAAA----TCGAGACC-TTGGTA---GGGTGTG--CCAT-GATAGGTGG----TGGCTGTG-TTACGCACGAGACCAA------------GTAAGTCA-----…
683	>M01634_72_000000000-C3HGL_1_2113_23918_17588	M01634_72_000000000-C3HGL_1_2113_23918_17588	TGCAGAATCCCGTGAACCATCGAGTCTTTGAACGCA-AGTTGCG-------------CTCCAAGCC-TTCTGGCCGAGGGCACGTCTGCCTGGGTGTC---ACAAAT----CGTCG-------T------------CC---------------------CC---C------CATA--CTCT-----C-----------------------GAG---GAT----------------A-GGGGACG----GAAGCTGATC-TCCCGTGTG----T---TTCCG-CACGCGGTTGGCCAAAAT----CTGAGGTA-AGGACG-CCAGGAGCG--TCTT-GACATGCGG----TGGTG------------------AA----------------TTCA-----…
164	>M01634_72_000000000-C3HGL_1_2113_23981_18347	M01634_72_000000000-C3HGL_1_2113_23981_18347	TGCAGAATCCCGTGAACCATCGAGTCTTTGAACGCA-AGTTGCG-------------CCCGAGGCC-TCCTGGTCGAGGGCACGTCTGCCTGGGTGTC---ACAAAT----CGTCG-----------------T--CC---------------------CC---C------CATC--CTCT-----C-----------------------GAG---GAT----------------A-TGGGATG----GAAGCTGATC-TCCCGTGTG----T---TACCG-CACGCGGTAGGCCAAAAT----CCAAGCTA-AGGACG-TCAGAAGCG--TCTT-GACATGCGG----TGGTG------------------AT----------------TTTA-----…
743	>M01634_72_000000000-C3HGL_1_2113_24927_17782	M01634_72_000000000-C3HGL_1_2113_24927_17782	TGCAGAATCCCGTGAACCATCGAGTCTTTGAACGCA-AGTTGCG-------------CCCCAACCC-TTCTAGCCGA-GGCACGTCTACCTGGGTGTC---ACAAAT----CTTCA--------T-----------CC---------------------CC---C------CATC--CTCT-----C-----------------------GAA---GAT----------------A-GGGTACG----GAAGCTGATC-TCCCGTGTG----T---TACCG-CACGTGGTTGGCAAAAAT----CCGAGCTA-AGGATG-CCAGGAGCA--TCTT-GACATGCGG----TGGTG------------------AA----------------TTCA-----…
770	>M01634_72_000000000-C3HGL_1_2113_26171_9121	M01634_72_000000000-C3HGL_1_2113_26171_9121	TGCAGAATCCCGTGAACCATCGAGTCTTTGAACG-A-AGTTGCG-------------CCCCAAGCC-TTCTGGCCGAGGGCACGTCTGCCTGGGTATC---ACAAAT----CATCG-------------------TCC---------------------CC---C------CATC--CTCT-----C-----------------------GAG---GAT----------------A-TGGGACG----GAAGCTGATC-TCCCGTGTG----T---TACCG-CACGCGGTTGGCCAAAAT----CCGAGCTA-AGGACG-TCAGAAGCA--TCTT-GACATGCGG----TGGTG------------------AA----------------TTTA-----…
415	>M01634_72_000000000-C3HGL_1_2113_26268_15164	M01634_72_000000000-C3HGL_1_2113_26268_15164	TGCAGAATCCCGTGAACCATCGAGTCTTTGAAAGCA-AGTTGCG-------------CCCTAAGCC-ATTAGGCCGAGGGCACGCCTGTCTGGGCATC---ACACGT----CGTTGC-------------------CC---------------------CC---C----CCTAACCCCCTC-----------------------------GGG---AGT--------------TGGGCGGGACG----GATGATGGCC-TCCCGTGTG--------CTCCGTCATGCGGTTGGCATAAAA---AACAAGTCC-TCGGCG---ACTAACA--CCAC-GACAATCGG----TGGTTGTC---------------AA-------------ACCTCTG-----…
572	>M01634_72_000000000-C3HGL_1_2113_7143_18817	M01634_72_000000000-C3HGL_1_2113_7143_18817	TGCAGAATCCCGTGAACCATCGAGTCTTTGAACGTA-AGTTGCA-------------CCCCAACCC-TTCTGGCCGAGGGCAAGTCTTCCTGGGTGTC---ACAAAT----CATCC--------T-----------CC---------------------CC---C------CATC--CTCT-----C-----------------------GAG---GAT----------------A-TGGGACG----GAAGCTGATC-TCCCGTGTG----T---TACCG-CACACGGTTGGCCAAAAT----CCGAGCTA-AGGACG--------------------------------------------------------------------------------…
90	>M01634_72_000000000-C3HGL_1_2113_7156_7944	M01634_72_000000000-C3HGL_1_2113_7156_7944	TGCAGAATCCCGTGAACCATCGAGTCTTTGAACGCA-AGTTGCG-------------CCCCAAGCC-TTCTGGCCGAGGGCTCTTCTGCCTGGGTGTC---ACAAAT----CGTCG--------T-----------CC---------------------CC---C------CATC--CCCT-----C-----------------------GAG---GAT----------------A-TGGGATG----GAAGCTGATC-TCCCGTGTG----T---TACCG-CATGCGGTTGGCTAAAAT----CCAAGC---------------------------------------------------------------------------------TCA-----…
642	>M01634_72_000000000-C3HGL_1_2113_8314_11300	M01634_72_000000000-C3HGL_1_2113_8314_11300	TGCAGAATCCCGTGAACCATCGAGTCTTTGAACGCA-AGTTGCG-------------CCCCAAGCC-TTCTGGCCGAGGGCACGTCTGCCTGGGTGTC---ACAAAT----CGTCG-------T------------CC---------------------CC---C------CATC--CTCT-----C-----------------------GAG---GAT----------------A-TGGGATG----GAAGCTGATC-TCCCGTGTG----T---TACCG-CACGCGGTTGGCCATAAT----CCTAGCTA-AGGATG-CCAGGAGCG--TCTT-GACATGCGG----TGGTG------------------AA----------------TTCA-----…
782	>M01634_72_000000000-C3HGL_1_2113_8952_23570	M01634_72_000000000-C3HGL_1_2113_8952_23570	CGCAGAATCCCGTGAACCACCGAGTCTTTGAACGCA-AGTTGCG-------------CCCCAAGCC-TTCTGGCCGAGGGTACGTCTGCCTGGGTGTC---ACAAAT----CATCG-------------------TCC---------------------CC---C------CATC--CTCT-----C-----------------------GAG---GAT----------------A-TGGGACG----GAAGCTGATC-TCCCGTGTG----T---TACCG-CACGCGGTTGGCCAAAAT----CCGAGCTA-AGGACG-TCAGTAGCG--TCTT-GACATGCGG----TGGTG------------------AA----------------TTTA-----…
682	>M01634_72_000000000-C3HGL_1_2113_9435_26574	M01634_72_000000000-C3HGL_1_2113_9435_26574	TGCAGAATCCCGTGAACCATCGAGTCTTTGAACGCA-AGTTGCG-------------CCCGAAGCC-GTTAGGCCGAGGGCACGTCTGCCTGGGCGTC---ACAAAT----CGTCG-------------------TCC---------------------CC---C------CATC--CTCT-----C-----------------------AAG---GAT----------------A-TGGGACG----GAAGCTGATC-TCCCGTGTG----T---TACCG-CACGCAGTTGGCCAAAAT----CCGAGCTA-AGGACG-TCAGTAGCG--TCTT-GACATGCGG----TGGTG------------------AA----------------TTTA-----…
235	>M01634_72_000000000-C3HGL_1_2113_9465_27078	M01634_72_000000000-C3HGL_1_2113_9465_27078	TGCAGAATCCCGTGAACCATCGAGTCTTTGAACGCA-AGTTGCG-------------CCCCAAGCC-TTCTGGCCGAGGGCACGTCTGCCTGGGTGTC---ACAAAT----CGTCG--------T-----------CC---------------------CC---C------CATC--CTCT-----C-----------------------GAG---GAT----------------A-TGGGACG----GAAGCTGATC-TCCCGTGTG----T---TACCG-CACGCGGTTGGCCAAAAT---CCAATTCTCGTCATATAGTCAGACGT--TCTT-GTCCAAAAG----CTCTT------------------GA----------------TGAC-----…
317	>M01634_72_000000000-C3HGL_1_2114_10627_13567	M01634_72_000000000-C3HGL_1_2114_10627_13567	TGCAAAATCCCGTGAACCATCGAGTCTTTGAACGCA-AGTTGCG-------------CCCCAAGCC-TTCTGGCCGAGGGCACGTCTGGCTGGGTGTC---ACAAAT----CGTCG--------T-----------CC---------------------CC---C------CATC--CTCT-----C-----------------------GAG---GAT----------------A-TGGGACG----GAAGCTGATC-TCCCGTGTG----T---TACCG-CACGCGGTTGGCCAAAAT----CCTAGCTA-AGGACG-TCAGGAGCG--TCTT-GACATTCGG----TGGTG------------------AA----------------TTCA-----…
634	>M01634_72_000000000-C3HGL_1_2114_14312_22228	M01634_72_000000000-C3HGL_1_2114_14312_22228	TG-------------CAGAATCCC-GTGAACAATCGAGTCTTTGAACGCAAGTTGC---ACCCCA----AGCCT--------T-----------CT---------------------GG---C------CGAG--GGCA-----C-----------------------GTG---TGC----------------C-TGGG-TG----TCA-CAAATC--GTCGTGGG----T---TACCG-CACGCGGTTGGCCAAAAT----CCGAGCTA-AGGACC-CCAGGAGCG--TTCT-TACATACGG----TGGTG------------------AA----------------TTCA--------------------ATT-----------------CTCG---…
797	>M01634_72_000000000-C3HGL_1_2114_15139_4424	M01634_72_000000000-C3HGL_1_2114_15139_4424	CCATCGAGTCTTTGAAC----------------GCA-AGTTGCG-------------CCCCAAGCT-TTCTGGCCGAGGGCACGTCTGCCTGGGTGTC---ACAAAT----CGTCG--------T-----------CC---------------------CC---C------AATC--CTCT-----C-----------------------AGG---GAT----------------A-TGGGACG----GAAGCTGATA-TCCCGTGTG----T---TACCA-CATGCAGTTGGCCAAAAT----CCGAGCTA-AGGACG-CCAGGAGCG--TCTT-GACATGCGG----TGGTG------------------AA----------------TTCA-----…
329	>M01634_72_000000000-C3HGL_1_2114_16876_25992	M01634_72_000000000-C3HGL_1_2114_16876_25992	TGCAGAATCCCGTGAACCATCGAGTCTTTGAACGCA-AGTTGCG-------------CCCCAAGGC-TTCTGGCCGAAAGCACGTCTGCCTGGGTGTC---ACAAAT----CGTCG--------T-----------AC---------------------CC---C------CATC--CTCA-----C-----------------------GAG---GAT----------------A-TCGGACG----GAAGCTGGTC-TCCCGTGTG----T---TACCG-CACGCGGTTGGCCAAAAT----CCGAGCTA-AGGATG-CCAGGAGCG--TCTT-GACATGCGG----TGGTG------------------AA----------------TTTA-----…
421	>M01634_72_000000000-C3HGL_1_2114_17071_13571	M01634_72_000000000-C3HGL_1_2114_17071_13571	TGCAGAATCCCGCGAACCATCGAGTCTTTGAACGCA-AGTTGCG-------------CCCGAGGCC-ACTTGGCCGAGGGCACGCCTGCCTGGGCGTCACGCCAAAC-ACGC------------------------T----------------------CC----------CACCCCTCAT-----C-----------------------GGG---TTG---------------TG-GGATGCG----GCATGTGGCT-CCCCGTCT---------TGCAA-GGGGCGGTGGGCCGAAGA----TGCGGCTG-CCGGCGTATCGTGCCG-GACAC-AGCGCGTGG----TGGGCGAACTCGC----------------------------TTTA-----…
173	>M01634_72_000000000-C3HGL_1_2114_18643_23639	M01634_72_000000000-C3HGL_1_2114_18643_23639	TGCAGAATCCCGTGAACCATCGAGTCTTTGAACGCA-AGTTGCG-------------CCCGAAGCC-GTTAGGCCGAGGGCACGTCTGCCTGGGCGTC---ACACGT----CGTTG--------------------CC---------------------CC---C---C--CGAC-CCCTT-----C-----------------------GGG---GGT-----------CG--GA-CGGGACG----GATGATGGCCTTCCCGTGTG--------CCCCGTCACGCGGTTGGCATAAAT---ACCGAGTCC-TCGGCG---ACCGGCG--TCGC-GGCGATCGG----TGGTTGT----------------CA------------AACCTCGG-----…
542	>M01634_72_000000000-C3HGL_1_2114_20993_16024	M01634_72_000000000-C3HGL_1_2114_20993_16024	TGCAGAATCCCGTGAACCATCGAGTCTTTGAACGCA-AGTTGCA-------------CCCCAAGCC-TTCTGGCCGAGGGCACGTCTGCCTGGGTGTC---ACAAAT----CATCG--------T-----------CC---------------------CC---C------CATC--CTCT-----C-----------------------GAG---GAT----------------A-TGGGACG----GAAGCTGATC-TCCCGTGTG----T---TACCG-CATGCGGTTGGCCAAAAT----CCGAGCTA-AGGATG-CCAGGAGCG--TCTT-GACTTGCGG----TGGTG------------------AA----------------TTCA-----…
[truncated: 13 more rows]

## Sheet: Result
Accession Querry	Accession Hit	Identity	Length hit	mismatchlength		start hit querry bp	Lenght querry		Identity	E-value	Score
M01634_72_000000000-C3HGL_1_1101_12995_2137	256093992	100	211	0	0	84	294	1	211	9e-118	418
M01634_72_000000000-C3HGL_1_1102_4321_11316	6855743	100	198	0	0	84	281	1	198	5e-110	392
M01634_72_000000000-C3HGL_1_1102_4321_11316	6752440	100	198	0	0	84	281	1	198	5e-110	392
[truncated: 1,613 more rows]

## Sheet: DATASET
	Representative_Sequence		Family	Genus		E-value	Pers.identity	total	14AR2S33	20AR25S35	20AR2S34	14JA21S41	14JA4S40	20JA21S43	20JA4S42	14SA11S67	14SA12S68	19SA11S69	19SA12S70	14SE3S71	20SE3S72	14VA1S80	14VA28S81	21VA1S82	15HE20S37	15HE8S36	18HE20S39	18HE8S38	15KU24S45	15KU6S44	21KU24S47	21KU6S46	15LA26S49	15LA7S48	21LA26S51	21LA7S50	15LI18S52	18LI18S53	18LI19S54	15PO10S59	15PO17S60	18PO10S61	18PO17S62	15PU27S66	15PU9S65	18PU27S64	18PU9S63	15UN23S74	15UN5S73
[truncated: 732 more rows]
[truncated: 13 more columns]

[truncated: 1 more sheets: Microscopy dataset individual]
