# Supplementary figures and images for: Bumble Bee Foraged Pollen Analyses in Spring Time in Southern Estonia Shows Abundant Food Sources
Source: MDPI journal article supplement (doi:10.3390/insects12100922), 2021-10-09

**Figure S2.** Example of pollen grains (strawberry) seen under light microscopy, magnification x1000.

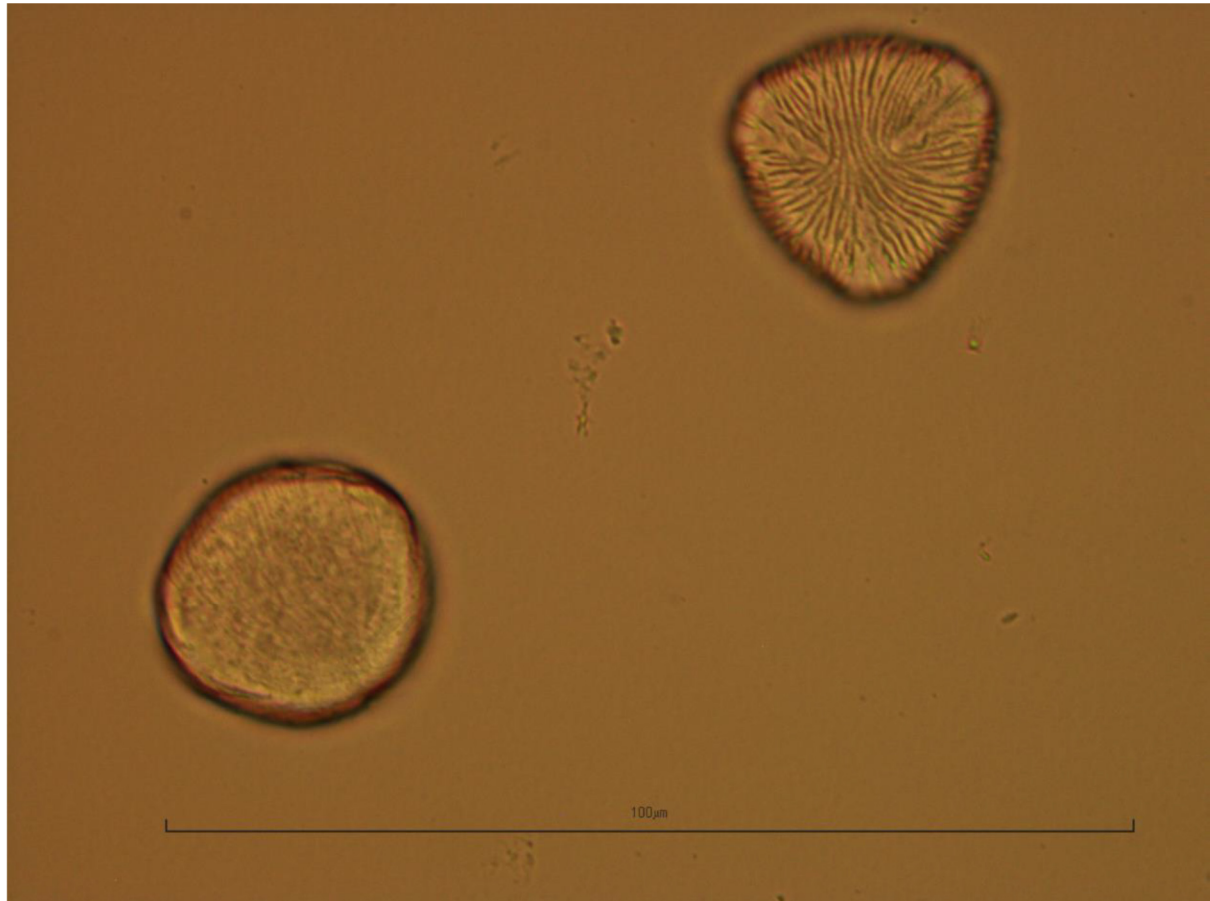

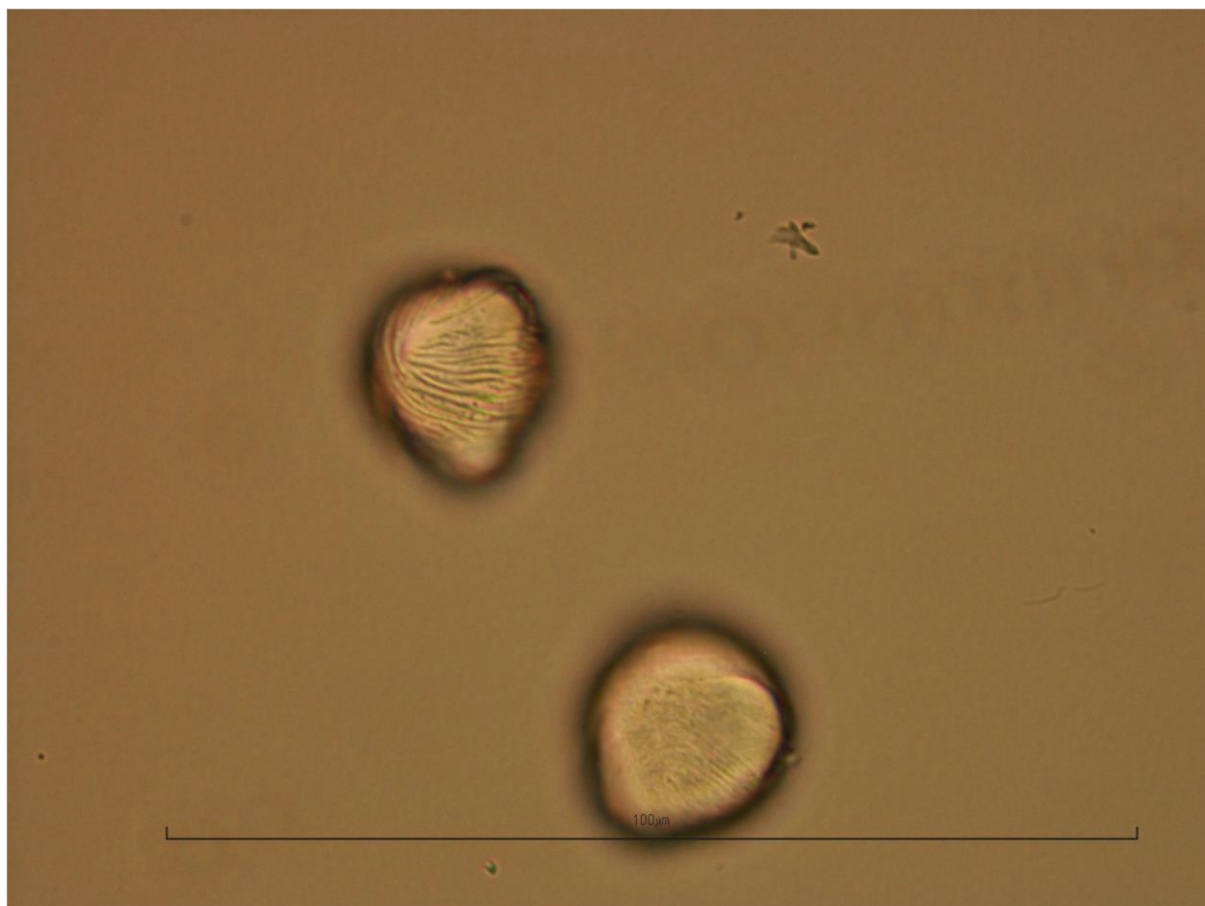

Supplement: s1 [file s1]
